# Supplementary material
Source: MDPI journal article supplement (https://www.mdpi.com/2673-7655/3/1/4)
Supplement: s1 [file s1]

| (2019/Sept– 2019/Nov) |              |                  |                  |
|-----------------------|--------------|------------------|------------------|
| lat                   | long         | date             | temperature (°C) |
| 27 38'45.5 S          | 52 16'19.1 W | 2019-09-01 00:00 | 12.9             |
| 27 38'45.5 S          | 52 16'19.1 W | 2019-09-01 00:10 | 12.8             |
| 27 38'45.5 S          | 52 16'19.1 W | 2019-09-01 00:20 | 12.8             |
| 27 38'45.5 S          | 52 16'19.1 W | 2019-09-01 00:30 | 12.8             |
| 27 38'45.5 S          | 52 16'19.1 W | 2019-09-01 00:40 | 12.7             |
| 27 38'45.5 S          | 52 16'19.1 W | 2019-09-01 00:50 | 12.7             |
| 27 38'45.5 S          | 52 16'19.1 W | 2019-09-01 01:00 | 12.7             |
| 27 38'45.5 S          | 52 16'19.1 W | 2019-09-01 01:10 | 12.6             |
| 27 38'45.5 S          | 52 16'19.1 W | 2019-09-01 01:20 | 12.6             |
| 27 38'45.5 S          | 52 16'19.1 W | 2019-09-01 01:30 | 12.4             |
| 27 38'45.5 S          | 52 16'19.1 W | 2019-09-01 01:40 | 12.4             |
| 27 38'45.5 S          | 52 16'19.1 W | 2019-09-01 01:50 | 12.3             |
| 27 38'45.5 S          | 52 16'19.1 W | 2019-09-01 02:00 | 12.3             |
| 27 38'45.5 S          | 52 16'19.1 W | 2019-09-01 02:10 | 12               |
| 27 38'45.5 S          | 52 16'19.1 W | 2019-09-01 02:20 | 11.9             |
| 27 38'45.5 S          | 52 16'19.1 W | 2019-09-01 02:30 | 11.9             |
| 27 38'45.5 S          | 52 16'19.1 W | 2019-09-01 02:40 | 11.8             |
| 27 38'45.5 S          | 52 16'19.1 W | 2019-09-01 02:50 | 11.4             |
| 27 38'45.5 S          | 52 16'19.1 W | 2019-09-01 03:00 | 11.5             |
| 27 38'45.5 S          | 52 16'19.1 W | 2019-09-01 03:10 | 11.3             |
| 27 38'45.5 S          | 52 16'19.1 W | 2019-09-01 03:20 | 11.2             |
| 27 38'45.5 S          | 52 16'19.1 W | 2019-09-01 03:30 | 10.9             |
| 27 38'45.5 S          | 52 16'19.1 W | 2019-09-01 03:40 | 10.8             |
| 27 38'45.5 S          | 52 16'19.1 W | 2019-09-01 03:50 | 10.8             |
| 27 38'45.5 S          | 52 16'19.1 W | 2019-09-01 04:00 | 10.6             |
| 27 38'45.5 S          | 52 16'19.1 W | 2019-09-01 04:10 | 10.4             |
| 27 38'45.5 S          | 52 16'19.1 W | 2019-09-01 04:20 | 10.1             |
| 27 38'45.5 S          | 52 16'19.1 W | 2019-09-01 04:30 | 9.9              |
| 27 38'45.5 S          | 52 16'19.1 W | 2019-09-01 04:40 | 9.8              |
| 27 38'45.5 S          | 52 16'19.1 W | 2019-09-01 04:50 | 9.9              |
| 27 38'45.5 S          | 52 16'19.1 W | 2019-09-01 05:00 | 10               |
| 27 38'45.5 S          | 52 16'19.1 W | 2019-09-01 05:10 | 10.1             |
| 27 38'45.5 S          | 52 16'19.1 W | 2019-09-01 05:20 | 10.1             |
| 27 38'45.5 S          | 52 16'19.1 W | 2019-09-01 05:30 | 10.1             |
| 27 38'45.5 S          | 52 16'19.1 W | 2019-09-01 05:40 | 10               |
| 27 38'45.5 S          | 52 16'19.1 W | 2019-09-01 05:50 | 9.9              |
| 27 38'45.5 S          | 52 16'19.1 W | 2019-09-01 06:00 | 9.9              |
| 27 38'45.5 S          | 52 16'19.1 W | 2019-09-01 06:10 | 9.7              |
| 27 38'45.5 S          | 52 16'19.1 W | 2019-09-01 06:20 | 9.4              |
| 27 38'45.5 S          | 52 16'19.1 W | 2019-09-01 06:30 | 9.3              |
| 27 38'45.5 S          | 52 16'19.1 W | 2019-09-01 06:40 | 9.1              |
| 27 38'45.5 S          | 52 16'19.1 W | 2019-09-01 06:50 | 8.9              |
| 27 38'45.5 S          | 52 16'19.1 W | 2019-09-01 07:00 | 8.9              |
| 27 38'45.5 S          | 52 16'19.1 W | 2019-09-01 07:10 | 8.8              |
| 27 38'45.5 S          | 52 16'19.1 W | 2019-09-01 07:20 | 8.9              |
| 27 38'45.5 S          | 52 16'19.1 W | 2019-09-01 07:30 | 8.9              |
| 27 38'45.5 S          | 52 16'19.1 W | 2019-09-01 07:40 | 9.3              |
| 27 38'45.5 S          | 52 16'19.1 W | 2019-09-01 07:50 | 9.7              |

[illegible]



















|              |              |                  |      |
|--------------|--------------|------------------|------|
| 27 38'45.5 S | 52 16'19.1 W | 2019-09-02 17:40 | 20.3 |
| 27 38'45.5 S | 52 16'19.1 W | 2019-09-02 17:50 | 19.4 |
| 27 38'45.5 S | 52 16'19.1 W | 2019-09-02 18:00 | 18.4 |
| 27 38'45.5 S | 52 16'19.1 W | 2019-09-02 18:10 | 17.6 |
| 27 38'45.5 S | 52 16'19.1 W | 2019-09-02 18:20 | 16.9 |
| 27 38'45.5 S | 52 16'19.1 W | 2019-09-02 18:30 | 16.3 |
| 27 38'45.5 S | 52 16'19.1 W | 2019-09-02 18:40 | 15.8 |
| 27 38'45.5 S | 52 16'19.1 W | 2019-09-02 18:50 | 15.4 |
| 27 38'45.5 S | 52 16'19.1 W | 2019-09-02 19:00 | 15.1 |
| 27 38'45.5 S | 52 16'19.1 W | 2019-09-02 19:10 | 14.6 |
| 27 38'45.5 S | 52 16'19.1 W | 2019-09-02 19:20 | 13.9 |
| 27 38'45.5 S | 52 16'19.1 W | 2019-09-02 19:30 | 14.2 |
| 27 38'45.5 S | 52 16'19.1 W | 2019-09-02 19:40 | 14   |
| 27 38'45.5 S | 52 16'19.1 W | 2019-09-02 19:50 | 14.1 |
| 27 38'45.5 S | 52 16'19.1 W | 2019-09-02 20:00 | 13.7 |
| 27 38'45.5 S | 52 16'19.1 W | 2019-09-02 20:10 | 13.8 |
| 27 38'45.5 S | 52 16'19.1 W | 2019-09-02 20:20 | 13.5 |
| 27 38'45.5 S | 52 16'19.1 W | 2019-09-02 20:30 | 13.3 |
| 27 38'45.5 S | 52 16'19.1 W | 2019-09-02 20:40 | 13.2 |
| 27 38'45.5 S | 52 16'19.1 W | 2019-09-02 20:50 | 13   |
| 27 38'45.5 S | 52 16'19.1 W | 2019-09-02 21:00 | 12.8 |
| 27 38'45.5 S | 52 16'19.1 W | 2019-09-02 21:10 | 12.8 |
| 27 38'45.5 S | 52 16'19.1 W | 2019-09-02 21:20 | 12.6 |
| 27 38'45.5 S | 52 16'19.1 W | 2019-09-02 21:30 | 12.5 |
| 27 38'45.5 S | 52 16'19.1 W | 2019-09-02 21:40 | 12.3 |
| 27 38'45.5 S | 52 16'19.1 W | 2019-09-02 21:50 | 12.3 |
| 27 38'45.5 S | 52 16'19.1 W | 2019-09-02 22:00 | 12.3 |
| 27 38'45.5 S | 52 16'19.1 W | 2019-09-02 22:10 | 12.4 |
| 27 38'45.5 S | 52 16'19.1 W | 2019-09-02 22:20 | 12.3 |
| 27 38'45.5 S | 52 16'19.1 W | 2019-09-02 22:30 | 12.1 |
| 27 38'45.5 S | 52 16'19.1 W | 2019-09-02 22:40 | 11.8 |
| 27 38'45.5 S | 52 16'19.1 W | 2019-09-02 22:50 | 11.4 |
| 27 38'45.5 S | 52 16'19.1 W | 2019-09-02 23:00 | 11.3 |
| 27 38'45.5 S | 52 16'19.1 W | 2019-09-02 23:10 | 10.9 |
| 27 38'45.5 S | 52 16'19.1 W | 2019-09-02 23:20 | 10.8 |
| 27 38'45.5 S | 52 16'19.1 W | 2019-09-02 23:30 | 10.8 |
| 27 38'45.5 S | 52 16'19.1 W | 2019-09-02 23:40 | 10.7 |
| 27 38'45.5 S | 52 16'19.1 W | 2019-09-02 23:50 | 10.6 |
| 27 38'45.5 S | 52 16'19.1 W | 2019-09-03 00:00 | 10.6 |
| 27 38'45.5 S | 52 16'19.1 W | 2019-09-03 00:10 | 10.6 |
| 27 38'45.5 S | 52 16'19.1 W | 2019-09-03 00:20 | 10.6 |
| 27 38'45.5 S | 52 16'19.1 W | 2019-09-03 00:30 | 10.5 |
| 27 38'45.5 S | 52 16'19.1 W | 2019-09-03 00:40 | 10.4 |
| 27 38'45.5 S | 52 16'19.1 W | 2019-09-03 00:50 | 10.3 |
| 27 38'45.5 S | 52 16'19.1 W | 2019-09-03 01:00 | 10.6 |
| 27 38'45.5 S | 52 16'19.1 W | 2019-09-03 01:10 | 10.7 |
| 27 38'45.5 S | 52 16'19.1 W | 2019-09-03 01:20 | 10.8 |
| 27 38'45.5 S | 52 16'19.1 W | 2019-09-03 01:30 | 10.8 |
| 27 38'45.5 S | 52 16'19.1 W | 2019-09-03 01:40 | 10.6 |
| 27 38'45.5 S | 52 16'19.1 W | 2019-09-03 01:50 | 10.4 |

[illegible]



|              |              |                  |      |
|--------------|--------------|------------------|------|
| 27 38'45.5 S | 52 16'19.1 W | 2019-09-03 02:00 | 10.3 |
| 27 38'45.5 S | 52 16'19.1 W | 2019-09-03 02:10 | 10.2 |
| 27 38'45.5 S | 52 16'19.1 W | 2019-09-03 02:20 | 10.1 |
| 27 38'45.5 S | 52 16'19.1 W | 2019-09-03 02:30 | 10.2 |
| 27 38'45.5 S | 52 16'19.1 W | 2019-09-03 02:40 | 10.1 |
| 27 38'45.5 S | 52 16'19.1 W | 2019-09-03 02:50 | 9.9  |
| 27 38'45.5 S | 52 16'19.1 W | 2019-09-03 03:00 | 9.8  |
| 27 38'45.5 S | 52 16'19.1 W | 2019-09-03 03:10 | 9.6  |
| 27 38'45.5 S | 52 16'19.1 W | 2019-09-03 03:20 | 9.6  |
| 27 38'45.5 S | 52 16'19.1 W | 2019-09-03 03:30 | 9.6  |
| 27 38'45.5 S | 52 16'19.1 W | 2019-09-03 03:40 | 9.6  |
| 27 38'45.5 S | 52 16'19.1 W | 2019-09-03 03:50 | 9.5  |
| 27 38'45.5 S | 52 16'19.1 W | 2019-09-03 04:00 | 9.4  |
| 27 38'45.5 S | 52 16'19.1 W | 2019-09-03 04:10 | 9.3  |
| 27 38'45.5 S | 52 16'19.1 W | 2019-09-03 04:20 | 9.1  |
| 27 38'45.5 S | 52 16'19.1 W | 2019-09-03 04:30 | 8.9  |
| 27 38'45.5 S | 52 16'19.1 W | 2019-09-03 04:40 | 8.8  |
| 27 38'45.5 S | 52 16'19.1 W | 2019-09-03 04:50 | 8.7  |
| 27 38'45.5 S | 52 16'19.1 W | 2019-09-03 05:00 | 8.7  |
| 27 38'45.5 S | 52 16'19.1 W | 2019-09-03 05:10 | 8.6  |
| 27 38'45.5 S | 52 16'19.1 W | 2019-09-03 05:20 | 8.6  |
| 27 38'45.5 S | 52 16'19.1 W | 2019-09-03 05:30 | 8.5  |
| 27 38'45.5 S | 52 16'19.1 W | 2019-09-03 05:40 | 8.2  |
| 27 38'45.5 S | 52 16'19.1 W | 2019-09-03 05:50 | 8.1  |
| 27 38'45.5 S | 52 16'19.1 W | 2019-09-03 06:00 | 8.1  |
| 27 38'45.5 S | 52 16'19.1 W | 2019-09-03 06:00 | 8.1  |
| 27 38'45.5 S | 52 16'19.1 W | 2019-09-03 06:10 | 7.8  |
| 27 38'45.5 S | 52 16'19.1 W | 2019-09-03 06:20 | 7.8  |
| 27 38'45.5 S | 52 16'19.1 W | 2019-09-03 06:30 | 7.8  |
| 27 38'45.5 S | 52 16'19.1 W | 2019-09-03 06:40 | 7.8  |
| 27 38'45.5 S | 52 16'19.1 W | 2019-09-03 06:50 | 7.9  |
| 27 38'45.5 S | 52 16'19.1 W | 2019-09-03 07:00 | 8.1  |
| 27 38'45.5 S | 52 16'19.1 W | 2019-09-03 07:10 | 8.3  |
| 27 38'45.5 S | 52 16'19.1 W | 2019-09-03 07:20 | 8.5  |
| 27 38'45.5 S | 52 16'19.1 W | 2019-09-03 07:30 | 8.7  |
| 27 38'45.5 S | 52 16'19.1 W | 2019-09-03 07:40 | 9.8  |
| 27 38'45.5 S | 52 16'19.1 W | 2019-09-03 07:50 | 10.4 |
| 27 38'45.5 S | 52 16'19.1 W | 2019-09-03 08:00 | 11   |
| 27 38'45.5 S | 52 16'19.1 W | 2019-09-03 08:10 | 11.4 |
| 27 38'45.5 S | 52 16'19.1 W | 2019-09-03 08:20 | 12.1 |
| 27 38'45.5 S | 52 16'19.1 W | 2019-09-03 08:30 | 12.6 |
| 27 38'45.5 S | 52 16'19.1 W | 2019-09-03 08:40 | 12.8 |
| 27 38'45.5 S | 52 16'19.1 W | 2019-09-03 08:50 | 13.3 |
| 27 38'45.5 S | 52 16'19.1 W | 2019-09-03 09:00 | 13.9 |
| 27 38'45.5 S | 52 16'19.1 W | 2019-09-03 09:10 | 14.6 |
| 27 38'45.5 S | 52 16'19.1 W | 2019-09-03 09:20 | 15.1 |
| 27 38'45.5 S | 52 16'19.1 W | 2019-09-03 09:30 | 15.1 |
| 27 38'45.5 S | 52 16'19.1 W | 2019-09-03 09:40 | 15.9 |
| 27 38'45.5 S | 52 16'19.1 W | 2019-09-03 09:50 | 16.7 |
| 27 38'45.5 S | 52 16'19.1 W | 2019-09-03 10:00 | 16.6 |

[illegible]































































|              |              |                  |      |
|--------------|--------------|------------------|------|
| 27 38'45.5 S | 52 16'19.1 W | 2019-09-08 15:30 | 31.3 |
| 27 38'45.5 S | 52 16'19.1 W | 2019-09-08 15:40 | 30.8 |
| 27 38'45.5 S | 52 16'19.1 W | 2019-09-08 15:50 | 31.5 |
| 27 38'45.5 S | 52 16'19.1 W | 2019-09-08 16:00 | 30.4 |
| 27 38'45.5 S | 52 16'19.1 W | 2019-09-08 16:10 | 29.9 |
| 27 38'45.5 S | 52 16'19.1 W | 2019-09-08 16:20 | 30.3 |
| 27 38'45.5 S | 52 16'19.1 W | 2019-09-08 16:30 | 30.6 |
| 27 38'45.5 S | 52 16'19.1 W | 2019-09-08 16:40 | 30.8 |
| 27 38'45.5 S | 52 16'19.1 W | 2019-09-08 16:50 | 29.9 |
| 27 38'45.5 S | 52 16'19.1 W | 2019-09-08 17:00 | 29.6 |
| 27 38'45.5 S | 52 16'19.1 W | 2019-09-08 17:10 | 29.3 |
| 27 38'45.5 S | 52 16'19.1 W | 2019-09-08 17:20 | 29.2 |
| 27 38'45.5 S | 52 16'19.1 W | 2019-09-08 17:30 | 29.1 |
| 27 38'45.5 S | 52 16'19.1 W | 2019-09-08 17:40 | 28.8 |
| 27 38'45.5 S | 52 16'19.1 W | 2019-09-08 17:50 | 28.3 |
| 27 38'45.5 S | 52 16'19.1 W | 2019-09-08 18:00 | 28.1 |
| 27 38'45.5 S | 52 16'19.1 W | 2019-09-08 18:10 | 27.6 |
| 27 38'45.5 S | 52 16'19.1 W | 2019-09-08 18:20 | 27.5 |
| 27 38'45.5 S | 52 16'19.1 W | 2019-09-08 18:30 | 27.3 |
| 27 38'45.5 S | 52 16'19.1 W | 2019-09-08 18:40 | 27.1 |
| 27 38'45.5 S | 52 16'19.1 W | 2019-09-08 18:50 | 27.1 |
| 27 38'45.5 S | 52 16'19.1 W | 2019-09-08 19:00 | 26.9 |
| 27 38'45.5 S | 52 16'19.1 W | 2019-09-08 19:10 | 26.9 |
| 27 38'45.5 S | 52 16'19.1 W | 2019-09-08 19:20 | 26.6 |
| 27 38'45.5 S | 52 16'19.1 W | 2019-09-08 19:30 | 26.2 |
| 27 38'45.5 S | 52 16'19.1 W | 2019-09-08 19:40 | 26.1 |
| 27 38'45.5 S | 52 16'19.1 W | 2019-09-08 19:50 | 26.1 |
| 27 38'45.5 S | 52 16'19.1 W | 2019-09-08 20:00 | 26   |
| 27 38'45.5 S | 52 16'19.1 W | 2019-09-08 20:10 | 25.8 |
| 27 38'45.5 S | 52 16'19.1 W | 2019-09-08 20:20 | 25.8 |
| 27 38'45.5 S | 52 16'19.1 W | 2019-09-08 20:30 | 25.9 |
| 27 38'45.5 S | 52 16'19.1 W | 2019-09-08 20:40 | 25.8 |
| 27 38'45.5 S | 52 16'19.1 W | 2019-09-08 20:50 | 26   |
| 27 38'45.5 S | 52 16'19.1 W | 2019-09-08 21:00 | 25.9 |
| 27 38'45.5 S | 52 16'19.1 W | 2019-09-08 21:10 | 26.1 |
| 27 38'45.5 S | 52 16'19.1 W | 2019-09-08 21:20 | 26.1 |
| 27 38'45.5 S | 52 16'19.1 W | 2019-09-08 21:30 | 25.9 |
| 27 38'45.5 S | 52 16'19.1 W | 2019-09-08 21:40 | 25.7 |
| 27 38'45.5 S | 52 16'19.1 W | 2019-09-08 21:50 | 25.2 |
| 27 38'45.5 S | 52 16'19.1 W | 2019-09-08 22:00 | 25.3 |
| 27 38'45.5 S | 52 16'19.1 W | 2019-09-08 22:10 | 25.5 |
| 27 38'45.5 S | 52 16'19.1 W | 2019-09-08 22:20 | 25.5 |
| 27 38'45.5 S | 52 16'19.1 W | 2019-09-08 22:30 | 25.6 |
| 27 38'45.5 S | 52 16'19.1 W | 2019-09-08 22:40 | 25.6 |
| 27 38'45.5 S | 52 16'19.1 W | 2019-09-08 22:50 | 25.6 |
| 27 38'45.5 S | 52 16'19.1 W | 2019-09-08 23:00 | 25.4 |
| 27 38'45.5 S | 52 16'19.1 W | 2019-09-08 23:10 | 25.5 |
| 27 38'45.5 S | 52 16'19.1 W | 2019-09-08 23:20 | 25.4 |
| 27 38'45.5 S | 52 16'19.1 W | 2019-09-08 23:30 | 25   |
| 27 38'45.5 S | 52 16'19.1 W | 2019-09-08 23:40 | 25   |

[illegible]











|              |              |                  |      |
|--------------|--------------|------------------|------|
| 27 38'45.5 S | 52 16'19.1 W | 2019-09-09 16:00 | 34   |
| 27 38'45.5 S | 52 16'19.1 W | 2019-09-09 16:10 | 33.9 |
| 27 38'45.5 S | 52 16'19.1 W | 2019-09-09 16:20 | 33.7 |
| 27 38'45.5 S | 52 16'19.1 W | 2019-09-09 16:30 | 33.7 |
| 27 38'45.5 S | 52 16'19.1 W | 2019-09-09 16:40 | 33.7 |
| 27 38'45.5 S | 52 16'19.1 W | 2019-09-09 16:50 | 33.5 |
| 27 38'45.5 S | 52 16'19.1 W | 2019-09-09 17:00 | 33.4 |
| 27 38'45.5 S | 52 16'19.1 W | 2019-09-09 17:10 | 33.4 |
| 27 38'45.5 S | 52 16'19.1 W | 2019-09-09 17:20 | 33.  |
| 27 38'45.5 S | 52 16'19.1 W | 2019-09-09 17:30 | 32.7 |
| 27 38'45.5 S | 52 16'19.1 W | 2019-09-09 17:40 | 32.3 |
| 27 38'45.5 S | 52 16'19.1 W | 2019-09-09 17:50 | 31.6 |
| 27 38'45.5 S | 52 16'19.1 W | 2019-09-09 18:00 | 30.9 |
| 27 38'45.5 S | 52 16'19.1 W | 2019-09-09 18:10 | 30.3 |
| 27 38'45.5 S | 52 16'19.1 W | 2019-09-09 18:20 | 29.9 |
| 27 38'45.5 S | 52 16'19.1 W | 2019-09-09 18:30 | 29.7 |
| 27 38'45.5 S | 52 16'19.1 W | 2019-09-09 18:40 | 29.6 |
| 27 38'45.5 S | 52 16'19.1 W | 2019-09-09 18:50 | 29.4 |
| 27 38'45.5 S | 52 16'19.1 W | 2019-09-09 19:00 | 29.3 |
| 27 38'45.5 S | 52 16'19.1 W | 2019-09-09 19:10 | 29.3 |
| 27 38'45.5 S | 52 16'19.1 W | 2019-09-09 19:20 | 29.1 |
| 27 38'45.5 S | 52 16'19.1 W | 2019-09-09 19:30 | 28.9 |
| 27 38'45.5 S | 52 16'19.1 W | 2019-09-09 19:40 | 28.6 |
| 27 38'45.5 S | 52 16'19.1 W | 2019-09-09 19:50 | 28.5 |
| 27 38'45.5 S | 52 16'19.1 W | 2019-09-09 20:00 | 28.4 |
| 27 38'45.5 S | 52 16'19.1 W | 2019-09-09 20:10 | 28.4 |
| 27 38'45.5 S | 52 16'19.1 W | 2019-09-09 20:20 | 28.1 |
| 27 38'45.5 S | 52 16'19.1 W | 2019-09-09 20:30 | 28   |
| 27 38'45.5 S | 52 16'19.1 W | 2019-09-09 20:40 | 27.9 |
| 27 38'45.5 S | 52 16'19.1 W | 2019-09-09 20:50 | 27.9 |
| 27 38'45.5 S | 52 16'19.1 W | 2019-09-09 21:00 | 27.6 |
| 27 38'45.5 S | 52 16'19.1 W | 2019-09-09 21:10 | 27.8 |
| 27 38'45.5 S | 52 16'19.1 W | 2019-09-09 21:20 | 27.6 |
| 27 38'45.5 S | 52 16'19.1 W | 2019-09-09 21:30 | 27.6 |
| 27 38'45.5 S | 52 16'19.1 W | 2019-09-09 21:40 | 27.4 |
| 27 38'45.5 S | 52 16'19.1 W | 2019-09-09 21:50 | 27.4 |
| 27 38'45.5 S | 52 16'19.1 W | 2019-09-09 22:00 | 27.1 |
| 27 38'45.5 S | 52 16'19.1 W | 2019-09-09 22:10 | 26.9 |
| 27 38'45.5 S | 52 16'19.1 W | 2019-09-09 22:20 | 26.7 |
| 27 38'45.5 S | 52 16'19.1 W | 2019-09-09 22:30 | 26.8 |
| 27 38'45.5 S | 52 16'19.1 W | 2019-09-09 22:40 | 26.6 |
| 27 38'45.5 S | 52 16'19.1 W | 2019-09-09 22:50 | 26.8 |
| 27 38'45.5 S | 52 16'19.1 W | 2019-09-09 23:00 | 26.4 |
| 27 38'45.5 S | 52 16'19.1 W | 2019-09-09 23:10 | 26.4 |
| 27 38'45.5 S | 52 16'19.1 W | 2019-09-09 23:20 | 26.2 |
| 27 38'45.5 S | 52 16'19.1 W | 2019-09-09 23:30 | 25.4 |
| 27 38'45.5 S | 52 16'19.1 W | 2019-09-09 23:40 | 25.1 |
| 27 38'45.5 S | 52 16'19.1 W | 2019-09-09 23:50 | 24.9 |
| 27 38'45.5 S | 52 16'19.1 W | 2019-09-10 00:00 | 24.9 |
| 27 38'45.5 S | 52 16'19.1 W | 2019-09-10 00:10 | 24.6 |

[illegible]











































































































































































































|              |              |                  |      |
|--------------|--------------|------------------|------|
| 27 38'45.5 S | 52 16'19.1 W | 2019-09-27 18:30 | 20.6 |
| 27 38'45.5 S | 52 16'19.1 W | 2019-09-27 18:40 | 19.9 |
| 27 38'45.5 S | 52 16'19.1 W | 2019-09-27 18:50 | 19.6 |
| 27 38'45.5 S | 52 16'19.1 W | 2019-09-27 19:00 | 19.4 |
| 27 38'45.5 S | 52 16'19.1 W | 2019-09-27 19:10 | 18.9 |
| 27 38'45.5 S | 52 16'19.1 W | 2019-09-27 19:20 | 18.6 |
| 27 38'45.5 S | 52 16'19.1 W | 2019-09-27 19:30 | 18.5 |
| 27 38'45.5 S | 52 16'19.1 W | 2019-09-27 19:40 | 18.1 |
| 27 38'45.5 S | 52 16'19.1 W | 2019-09-27 19:50 | 17.8 |
| 27 38'45.5 S | 52 16'19.1 W | 2019-09-27 20:00 | 17.6 |
| 27 38'45.5 S | 52 16'19.1 W | 2019-09-27 20:10 | 17.7 |
| 27 38'45.5 S | 52 16'19.1 W | 2019-09-27 20:20 | 17.3 |
| 27 38'45.5 S | 52 16'19.1 W | 2019-09-27 20:30 | 17.3 |
| 27 38'45.5 S | 52 16'19.1 W | 2019-09-27 20:40 | 17   |
| 27 38'45.5 S | 52 16'19.1 W | 2019-09-27 20:50 | 16.9 |
| 27 38'45.5 S | 52 16'19.1 W | 2019-09-27 21:00 | 16.6 |
| 27 38'45.5 S | 52 16'19.1 W | 2019-09-27 21:10 | 16.4 |
| 27 38'45.5 S | 52 16'19.1 W | 2019-09-27 21:20 | 16.1 |
| 27 38'45.5 S | 52 16'19.1 W | 2019-09-27 21:30 | 15.9 |
| 27 38'45.5 S | 52 16'19.1 W | 2019-09-27 21:40 | 15.6 |
| 27 38'45.5 S | 52 16'19.1 W | 2019-09-27 21:50 | 15.4 |
| 27 38'45.5 S | 52 16'19.1 W | 2019-09-27 22:00 | 15.2 |
| 27 38'45.5 S | 52 16'19.1 W | 2019-09-27 22:10 | 14.9 |
| 27 38'45.5 S | 52 16'19.1 W | 2019-09-27 22:20 | 14.9 |
| 27 38'45.5 S | 52 16'19.1 W | 2019-09-27 22:30 | 14.7 |
| 27 38'45.5 S | 52 16'19.1 W | 2019-09-27 22:40 | 14.4 |
| 27 38'45.5 S | 52 16'19.1 W | 2019-09-27 22:50 | 14.2 |
| 27 38'45.5 S | 52 16'19.1 W | 2019-09-27 23:00 | 13.9 |
| 27 38'45.5 S | 52 16'19.1 W | 2019-09-27 23:10 | 13.8 |
| 27 38'45.5 S | 52 16'19.1 W | 2019-09-27 23:20 | 13.5 |
| 27 38'45.5 S | 52 16'19.1 W | 2019-09-27 23:30 | 13.4 |
| 27 38'45.5 S | 52 16'19.1 W | 2019-09-27 23:40 | 13.2 |
| 27 38'45.5 S | 52 16'19.1 W | 2019-09-27 23:50 | 13.2 |
| 27 38'45.5 S | 52 16'19.1 W | 2019-09-28 00:00 | 13   |
| 27 38'45.5 S | 52 16'19.1 W | 2019-09-28 00:10 | 12.9 |
| 27 38'45.5 S | 52 16'19.1 W | 2019-09-28 00:20 | 12.7 |
| 27 38'45.5 S | 52 16'19.1 W | 2019-09-28 00:30 | 12.6 |
| 27 38'45.5 S | 52 16'19.1 W | 2019-09-28 00:40 | 12.4 |
| 27 38'45.5 S | 52 16'19.1 W | 2019-09-28 00:50 | 12.4 |
| 27 38'45.5 S | 52 16'19.1 W | 2019-09-28 01:00 | 12.3 |
| 27 38'45.5 S | 52 16'19.1 W | 2019-09-28 01:10 | 12.2 |
| 27 38'45.5 S | 52 16'19.1 W | 2019-09-28 01:20 | 12.1 |
| 27 38'45.5 S | 52 16'19.1 W | 2019-09-28 01:30 | 12.1 |
| 27 38'45.5 S | 52 16'19.1 W | 2019-09-28 01:40 | 11.9 |
| 27 38'45.5 S | 52 16'19.1 W | 2019-09-28 01:50 | 11.8 |
| 27 38'45.5 S | 52 16'19.1 W | 2019-09-28 02:00 | 11.8 |
| 27 38'45.5 S | 52 16'19.1 W | 2019-09-28 02:10 | 11.8 |
| 27 38'45.5 S | 52 16'19.1 W | 2019-09-28 02:20 | 11.8 |
| 27 38'45.5 S | 52 16'19.1 W | 2019-09-28 02:30 | 11.8 |
| 27 38'45.5 S | 52 16'19.1 W | 2019-09-28 02:40 | 11.8 |

[illegible]































|              |              |                  |      |
|--------------|--------------|------------------|------|
| 27 38'45.5 S | 52 16'19.1 W | 2019-09-30 16:10 | 31.4 |
| 27 38'45.5 S | 52 16'19.1 W | 2019-09-30 16:20 | 31.3 |
| 27 38'45.5 S | 52 16'19.1 W | 2019-09-30 16:30 | 30.8 |
| 27 38'45.5 S | 52 16'19.1 W | 2019-09-30 16:40 | 31.7 |
| 27 38'45.5 S | 52 16'19.1 W | 2019-09-30 16:50 | 31.3 |
| 27 38'45.5 S | 52 16'19.1 W | 2019-09-30 17:00 | 31.1 |
| 27 38'45.5 S | 52 16'19.1 W | 2019-09-30 17:10 | 30.4 |
| 27 38'45.5 S | 52 16'19.1 W | 2019-09-30 17:20 | 30.3 |
| 27 38'45.5 S | 52 16'19.1 W | 2019-09-30 17:30 | 30   |
| 27 38'45.5 S | 52 16'19.1 W | 2019-09-30 17:40 | 30.2 |
| 27 38'45.5 S | 52 16'19.1 W | 2019-09-30 17:50 | 29.6 |
| 27 38'45.5 S | 52 16'19.1 W | 2019-09-30 18:00 | 29.1 |
| 27 38'45.5 S | 52 16'19.1 W | 2019-09-30 18:10 | 28.6 |
| 27 38'45.5 S | 52 16'19.1 W | 2019-09-30 18:20 | 27.8 |
| 27 38'45.5 S | 52 16'19.1 W | 2019-09-30 18:30 | 26.9 |
| 27 38'45.5 S | 52 16'19.1 W | 2019-09-30 18:40 | 26.4 |
| 27 38'45.5 S | 52 16'19.1 W | 2019-09-30 18:50 | 26.1 |
| 27 38'45.5 S | 52 16'19.1 W | 2019-09-30 19:00 | 26   |
| 27 38'45.5 S | 52 16'19.1 W | 2019-09-30 19:10 | 25.9 |
| 27 38'45.5 S | 52 16'19.1 W | 2019-09-30 19:20 | 25.9 |
| 27 38'45.5 S | 52 16'19.1 W | 2019-09-30 19:30 | 25.8 |
| 27 38'45.5 S | 52 16'19.1 W | 2019-09-30 19:40 | 25   |
| 27 38'45.5 S | 52 16'19.1 W | 2019-09-30 19:50 | 24.9 |
| 27 38'45.5 S | 52 16'19.1 W | 2019-09-30 20:00 | 24.9 |
| 27 38'45.5 S | 52 16'19.1 W | 2019-09-30 20:10 | 24.9 |
| 27 38'45.5 S | 52 16'19.1 W | 2019-09-30 20:20 | 24.9 |
| 27 38'45.5 S | 52 16'19.1 W | 2019-09-30 20:30 | 24.7 |
| 27 38'45.5 S | 52 16'19.1 W | 2019-09-30 20:40 | 24.7 |
| 27 38'45.5 S | 52 16'19.1 W | 2019-09-30 20:50 | 24.6 |
| 27 38'45.5 S | 52 16'19.1 W | 2019-09-30 21:00 | 24.3 |
| 27 38'45.5 S | 52 16'19.1 W | 2019-09-30 21:10 | 23.9 |
| 27 38'45.5 S | 52 16'19.1 W | 2019-09-30 21:20 | 23.9 |
| 27 38'45.5 S | 52 16'19.1 W | 2019-09-30 21:30 | 23.6 |
| 27 38'45.5 S | 52 16'19.1 W | 2019-09-30 21:40 | 23.2 |
| 27 38'45.5 S | 52 16'19.1 W | 2019-09-30 21:50 | 22.9 |
| 27 38'45.5 S | 52 16'19.1 W | 2019-09-30 22:00 | 22.4 |
| 27 38'45.5 S | 52 16'19.1 W | 2019-09-30 22:10 | 22.4 |
| 27 38'45.5 S | 52 16'19.1 W | 2019-09-30 22:20 | 23   |
| 27 38'45.5 S | 52 16'19.1 W | 2019-09-30 22:30 | 23.6 |
| 27 38'45.5 S | 52 16'19.1 W | 2019-09-30 22:40 | 23.4 |
| 27 38'45.5 S | 52 16'19.1 W | 2019-09-30 22:50 | 23.1 |
| 27 38'45.5 S | 52 16'19.1 W | 2019-09-30 23:00 | 22.9 |
| 27 38'45.5 S | 52 16'19.1 W | 2019-09-30 23:10 | 22.8 |
| 27 38'45.5 S | 52 16'19.1 W | 2019-09-30 23:10 | 22.8 |
| 27 38'45.5 S | 52 16'19.1 W | 2019-09-30 23:20 | 22.6 |
| 27 38'45.5 S | 52 16'19.1 W | 2019-09-30 23:30 | 22.4 |
| 27 38'45.5 S | 52 16'19.1 W | 2019-09-30 23:40 | 22.3 |
| 27 38'45.5 S | 52 16'19.1 W | 2019-09-30 23:50 | 22.1 |
| 27 38'45.5 S | 52 16'19.1 W | 2019-10-01 00:00 | 21.4 |
| 27 38'45.5 S | 52 16'19.1 W | 2019-10-01 00:10 | 20.7 |

[illegible]











|              |              |                  |      |
|--------------|--------------|------------------|------|
| 27 38'45.5 S | 52 16'19.1 W | 2019-10-01 17:30 | 33.7 |
| 27 38'45.5 S | 52 16'19.1 W | 2019-10-01 17:40 | 33.1 |
| 27 38'45.5 S | 52 16'19.1 W | 2019-10-01 17:50 | 33.1 |
| 27 38'45.5 S | 52 16'19.1 W | 2019-10-01 18:00 | 32.6 |
| 27 38'45.5 S | 52 16'19.1 W | 2019-10-01 18:10 | 31.6 |
| 27 38'45.5 S | 52 16'19.1 W | 2019-10-01 18:20 | 30.8 |
| 27 38'45.5 S | 52 16'19.1 W | 2019-10-01 18:30 | 30.1 |
| 27 38'45.5 S | 52 16'19.1 W | 2019-10-01 18:40 | 29.8 |
| 27 38'45.5 S | 52 16'19.1 W | 2019-10-01 18:50 | 29.9 |
| 27 38'45.5 S | 52 16'19.1 W | 2019-10-01 19:00 | 29.1 |
| 27 38'45.5 S | 52 16'19.1 W | 2019-10-01 19:10 | 29.1 |
| 27 38'45.5 S | 52 16'19.1 W | 2019-10-01 19:20 | 28.9 |
| 27 38'45.5 S | 52 16'19.1 W | 2019-10-01 19:30 | 28.6 |
| 27 38'45.5 S | 52 16'19.1 W | 2019-10-01 19:40 | 28.6 |
| 27 38'45.5 S | 52 16'19.1 W | 2019-10-01 19:50 | 28.3 |
| 27 38'45.5 S | 52 16'19.1 W | 2019-10-01 20:00 | 28.2 |
| 27 38'45.5 S | 52 16'19.1 W | 2019-10-01 20:10 | 28.4 |
| 27 38'45.5 S | 52 16'19.1 W | 2019-10-01 20:20 | 28.2 |
| 27 38'45.5 S | 52 16'19.1 W | 2019-10-01 20:30 | 28.1 |
| 27 38'45.5 S | 52 16'19.1 W | 2019-10-01 20:40 | 28.1 |
| 27 38'45.5 S | 52 16'19.1 W | 2019-10-01 20:50 | 27.4 |
| 27 38'45.5 S | 52 16'19.1 W | 2019-10-01 21:00 | 26.4 |
| 27 38'45.5 S | 52 16'19.1 W | 2019-10-01 21:10 | 27.3 |
| 27 38'45.5 S | 52 16'19.1 W | 2019-10-01 21:20 | 27.4 |
| 27 38'45.5 S | 52 16'19.1 W | 2019-10-01 21:30 | 27.6 |
| 27 38'45.5 S | 52 16'19.1 W | 2019-10-01 21:40 | 27.9 |
| 27 38'45.5 S | 52 16'19.1 W | 2019-10-01 21:50 | 27.9 |
| 27 38'45.5 S | 52 16'19.1 W | 2019-10-01 22:00 | 27.7 |
| 27 38'45.5 S | 52 16'19.1 W | 2019-10-01 22:10 | 27.6 |
| 27 38'45.5 S | 52 16'19.1 W | 2019-10-01 22:20 | 27.4 |
| 27 38'45.5 S | 52 16'19.1 W | 2019-10-01 22:30 | 27.1 |
| 27 38'45.5 S | 52 16'19.1 W | 2019-10-01 22:40 | 26.6 |
| 27 38'45.5 S | 52 16'19.1 W | 2019-10-01 22:50 | 26.4 |
| 27 38'45.5 S | 52 16'19.1 W | 2019-10-01 23:00 | 26.8 |
| 27 38'45.5 S | 52 16'19.1 W | 2019-10-01 23:10 | 26.8 |
| 27 38'45.5 S | 52 16'19.1 W | 2019-10-01 23:20 | 25.1 |
| 27 38'45.5 S | 52 16'19.1 W | 2019-10-01 23:30 | 24.7 |
| 27 38'45.5 S | 52 16'19.1 W | 2019-10-01 23:40 | 23.6 |
| 27 38'45.5 S | 52 16'19.1 W | 2019-10-01 23:50 | 24.1 |
| 27 38'45.5 S | 52 16'19.1 W | 2019-10-02 00:00 | 25.6 |
| 27 38'45.5 S | 52 16'19.1 W | 2019-10-02 00:10 | 25.9 |
| 27 38'45.5 S | 52 16'19.1 W | 2019-10-02 00:20 | 25.6 |
| 27 38'45.5 S | 52 16'19.1 W | 2019-10-02 00:30 | 25.2 |
| 27 38'45.5 S | 52 16'19.1 W | 2019-10-02 00:40 | 24.9 |
| 27 38'45.5 S | 52 16'19.1 W | 2019-10-02 00:50 | 24.8 |
| 27 38'45.5 S | 52 16'19.1 W | 2019-10-02 01:00 | 24.5 |
| 27 38'45.5 S | 52 16'19.1 W | 2019-10-02 01:10 | 24   |
| 27 38'45.5 S | 52 16'19.1 W | 2019-10-02 01:20 | 24.2 |
| 27 38'45.5 S | 52 16'19.1 W | 2019-10-02 01:30 | 23.9 |
| 27 38'45.5 S | 52 16'19.1 W | 2019-10-02 01:40 | 24.3 |

[illegible]























































|              |              |                  |      |
|--------------|--------------|------------------|------|
| 27 38'45.5 S | 52 16'19.1 W | 2019-10-06 15:40 | 17.2 |
| 27 38'45.5 S | 52 16'19.1 W | 2019-10-06 15:50 | 17.1 |
| 27 38'45.5 S | 52 16'19.1 W | 2019-10-06 16:00 | 16.9 |
| 27 38'45.5 S | 52 16'19.1 W | 2019-10-06 16:10 | 16.6 |
| 27 38'45.5 S | 52 16'19.1 W | 2019-10-06 16:20 | 16.8 |
| 27 38'45.5 S | 52 16'19.1 W | 2019-10-06 16:30 | 16.6 |
| 27 38'45.5 S | 52 16'19.1 W | 2019-10-06 16:40 | 16.5 |
| 27 38'45.5 S | 52 16'19.1 W | 2019-10-06 16:50 | 16.3 |
| 27 38'45.5 S | 52 16'19.1 W | 2019-10-06 17:00 | 16.3 |
| 27 38'45.5 S | 52 16'19.1 W | 2019-10-06 17:10 | 16.3 |
| 27 38'45.5 S | 52 16'19.1 W | 2019-10-06 17:20 | 16.4 |
| 27 38'45.5 S | 52 16'19.1 W | 2019-10-06 17:30 | 16.3 |
| 27 38'45.5 S | 52 16'19.1 W | 2019-10-06 17:40 | 16.2 |
| 27 38'45.5 S | 52 16'19.1 W | 2019-10-06 17:50 | 16.1 |
| 27 38'45.5 S | 52 16'19.1 W | 2019-10-06 18:00 | 15.9 |
| 27 38'45.5 S | 52 16'19.1 W | 2019-10-06 18:10 | 15.8 |
| 27 38'45.5 S | 52 16'19.1 W | 2019-10-06 18:20 | 15.7 |
| 27 38'45.5 S | 52 16'19.1 W | 2019-10-06 18:30 | 15.4 |
| 27 38'45.5 S | 52 16'19.1 W | 2019-10-06 18:40 | 15.3 |
| 27 38'45.5 S | 52 16'19.1 W | 2019-10-06 18:50 | 15.2 |
| 27 38'45.5 S | 52 16'19.1 W | 2019-10-06 19:00 | 15.1 |
| 27 38'45.5 S | 52 16'19.1 W | 2019-10-06 19:10 | 15.1 |
| 27 38'45.5 S | 52 16'19.1 W | 2019-10-06 19:20 | 15.1 |
| 27 38'45.5 S | 52 16'19.1 W | 2019-10-06 19:30 | 14.9 |
| 27 38'45.5 S | 52 16'19.1 W | 2019-10-06 19:40 | 15   |
| 27 38'45.5 S | 52 16'19.1 W | 2019-10-06 19:50 | 15.1 |
| 27 38'45.5 S | 52 16'19.1 W | 2019-10-06 20:00 | 15.1 |
| 27 38'45.5 S | 52 16'19.1 W | 2019-10-06 20:10 | 15   |
| 27 38'45.5 S | 52 16'19.1 W | 2019-10-06 20:20 | 14.9 |
| 27 38'45.5 S | 52 16'19.1 W | 2019-10-06 20:30 | 14.9 |
| 27 38'45.5 S | 52 16'19.1 W | 2019-10-06 20:40 | 15   |
| 27 38'45.5 S | 52 16'19.1 W | 2019-10-06 20:50 | 15   |
| 27 38'45.5 S | 52 16'19.1 W | 2019-10-06 21:00 | 14.9 |
| 27 38'45.5 S | 52 16'19.1 W | 2019-10-06 21:10 | 14.8 |
| 27 38'45.5 S | 52 16'19.1 W | 2019-10-06 21:20 | 14.7 |
| 27 38'45.5 S | 52 16'19.1 W | 2019-10-06 21:30 | 14.6 |
| 27 38'45.5 S | 52 16'19.1 W | 2019-10-06 21:40 | 14.6 |
| 27 38'45.5 S | 52 16'19.1 W | 2019-10-06 21:50 | 14.6 |
| 27 38'45.5 S | 52 16'19.1 W | 2019-10-06 22:00 | 14.4 |
| 27 38'45.5 S | 52 16'19.1 W | 2019-10-06 22:10 | 14.4 |
| 27 38'45.5 S | 52 16'19.1 W | 2019-10-06 22:20 | 14.3 |
| 27 38'45.5 S | 52 16'19.1 W | 2019-10-06 22:30 | 14.3 |
| 27 38'45.5 S | 52 16'19.1 W | 2019-10-06 22:40 | 14.2 |
| 27 38'45.5 S | 52 16'19.1 W | 2019-10-06 22:50 | 14.1 |
| 27 38'45.5 S | 52 16'19.1 W | 2019-10-06 23:00 | 14.1 |
| 27 38'45.5 S | 52 16'19.1 W | 2019-10-06 23:10 | 14.1 |
| 27 38'45.5 S | 52 16'19.1 W | 2019-10-06 23:20 | 13.9 |
| 27 38'45.5 S | 52 16'19.1 W | 2019-10-06 23:30 | 14.1 |
| 27 38'45.5 S | 52 16'19.1 W | 2019-10-06 23:40 | 14.1 |
| 27 38'45.5 S | 52 16'19.1 W | 2019-10-06 23:50 | 14   |

[illegible]



























|              |              |                  |      |
|--------------|--------------|------------------|------|
| 27 38'45.5 S | 52 16'19.1 W | 2019-10-09 01:50 | 14.4 |
| 27 38'45.5 S | 52 16'19.1 W | 2019-10-09 02:00 | 14.3 |
| 27 38'45.5 S | 52 16'19.1 W | 2019-10-09 02:10 | 14.6 |
| 27 38'45.5 S | 52 16'19.1 W | 2019-10-09 02:20 | 15.1 |
| 27 38'45.5 S | 52 16'19.1 W | 2019-10-09 02:30 | 15.6 |
| 27 38'45.5 S | 52 16'19.1 W | 2019-10-09 02:40 | 15.4 |
| 27 38'45.5 S | 52 16'19.1 W | 2019-10-09 02:50 | 15.1 |
| 27 38'45.5 S | 52 16'19.1 W | 2019-10-09 03:00 | 15   |
| 27 38'45.5 S | 52 16'19.1 W | 2019-10-09 03:10 | 14.9 |
| 27 38'45.5 S | 52 16'19.1 W | 2019-10-09 03:20 | 14.3 |
| 27 38'45.5 S | 52 16'19.1 W | 2019-10-09 03:30 | 14.6 |
| 27 38'45.5 S | 52 16'19.1 W | 2019-10-09 03:40 | 14.5 |
| 27 38'45.5 S | 52 16'19.1 W | 2019-10-09 03:50 | 14.4 |
| 27 38'45.5 S | 52 16'19.1 W | 2019-10-09 04:00 | 14.4 |
| 27 38'45.5 S | 52 16'19.1 W | 2019-10-09 04:10 | 14.3 |
| 27 38'45.5 S | 52 16'19.1 W | 2019-10-09 04:20 | 14.3 |
| 27 38'45.5 S | 52 16'19.1 W | 2019-10-09 04:30 | 14.1 |
| 27 38'45.5 S | 52 16'19.1 W | 2019-10-09 04:40 | 14.1 |
| 27 38'45.5 S | 52 16'19.1 W | 2019-10-09 04:50 | 14.1 |
| 27 38'45.5 S | 52 16'19.1 W | 2019-10-09 05:00 | 14.1 |
| 27 38'45.5 S | 52 16'19.1 W | 2019-10-09 05:10 | 13.7 |
| 27 38'45.5 S | 52 16'19.1 W | 2019-10-09 05:20 | 13.6 |
| 27 38'45.5 S | 52 16'19.1 W | 2019-10-09 05:30 | 13.9 |
| 27 38'45.5 S | 52 16'19.1 W | 2019-10-09 05:40 | 13.8 |
| 27 38'45.5 S | 52 16'19.1 W | 2019-10-09 05:50 | 13.5 |
| 27 38'45.5 S | 52 16'19.1 W | 2019-10-09 06:00 | 13.4 |
| 27 38'45.5 S | 52 16'19.1 W | 2019-10-09 06:10 | 13.4 |
| 27 38'45.5 S | 52 16'19.1 W | 2019-10-09 06:20 | 13.3 |
| 27 38'45.5 S | 52 16'19.1 W | 2019-10-09 06:30 | 12.9 |
| 27 38'45.5 S | 52 16'19.1 W | 2019-10-09 06:40 | 12.8 |
| 27 38'45.5 S | 52 16'19.1 W | 2019-10-09 06:50 | 12.9 |
| 27 38'45.5 S | 52 16'19.1 W | 2019-10-09 07:00 | 13.8 |
| 27 38'45.5 S | 52 16'19.1 W | 2019-10-09 07:10 | 15.4 |
| 27 38'45.5 S | 52 16'19.1 W | 2019-10-09 07:20 | 16.9 |
| 27 38'45.5 S | 52 16'19.1 W | 2019-10-09 07:30 | 17.9 |
| 27 38'45.5 S | 52 16'19.1 W | 2019-10-09 07:40 | 17.8 |
| 27 38'45.5 S | 52 16'19.1 W | 2019-10-09 07:50 | 18.3 |
| 27 38'45.5 S | 52 16'19.1 W | 2019-10-09 08:00 | 18.7 |
| 27 38'45.5 S | 52 16'19.1 W | 2019-10-09 08:10 | 19.3 |
| 27 38'45.5 S | 52 16'19.1 W | 2019-10-09 08:20 | 19.3 |
| 27 38'45.5 S | 52 16'19.1 W | 2019-10-09 08:30 | 19.9 |
| 27 38'45.5 S | 52 16'19.1 W | 2019-10-09 08:40 | 20.6 |
| 27 38'45.5 S | 52 16'19.1 W | 2019-10-09 08:50 | 21.1 |
| 27 38'45.5 S | 52 16'19.1 W | 2019-10-09 09:00 | 21.6 |
| 27 38'45.5 S | 52 16'19.1 W | 2019-10-09 09:10 | 21.9 |
| 27 38'45.5 S | 52 16'19.1 W | 2019-10-09 09:20 | 22.9 |
| 27 38'45.5 S | 52 16'19.1 W | 2019-10-09 09:30 | 23.7 |
| 27 38'45.5 S | 52 16'19.1 W | 2019-10-09 09:40 | 24.3 |
| 27 38'45.5 S | 52 16'19.1 W | 2019-10-09 09:50 | 24.8 |
| 27 38'45.5 S | 52 16'19.1 W | 2019-10-09 10:00 | 25.8 |

[illegible]



















































|              |              |                  |      |
|--------------|--------------|------------------|------|
| 27 38'45.5 S | 52 16'19.1 W | 2019-10-13 15:50 | 35.4 |
| 27 38'45.5 S | 52 16'19.1 W | 2019-10-13 16:00 | 36.3 |
| 27 38'45.5 S | 52 16'19.1 W | 2019-10-13 16:10 | 34.2 |
| 27 38'45.5 S | 52 16'19.1 W | 2019-10-13 16:20 | 31.8 |
| 27 38'45.5 S | 52 16'19.1 W | 2019-10-13 16:30 | 31.4 |
| 27 38'45.5 S | 52 16'19.1 W | 2019-10-13 16:40 | 32.9 |
| 27 38'45.5 S | 52 16'19.1 W | 2019-10-13 16:50 | 32   |
| 27 38'45.5 S | 52 16'19.1 W | 2019-10-13 17:00 | 30   |
| 27 38'45.5 S | 52 16'19.1 W | 2019-10-13 17:10 | 29.6 |
| 27 38'45.5 S | 52 16'19.1 W | 2019-10-13 17:20 | 29   |
| 27 38'45.5 S | 52 16'19.1 W | 2019-10-13 17:30 | 27.8 |
| 27 38'45.5 S | 52 16'19.1 W | 2019-10-13 17:50 | 28   |
| 27 38'45.5 S | 52 16'19.1 W | 2019-10-13 18:00 | 28.6 |
| 27 38'45.5 S | 52 16'19.1 W | 2019-10-13 18:10 | 28.1 |
| 27 38'45.5 S | 52 16'19.1 W | 2019-10-13 18:20 | 27.8 |
| 27 38'45.5 S | 52 16'19.1 W | 2019-10-13 18:30 | 27.9 |
| 27 38'45.5 S | 52 16'19.1 W | 2019-10-13 18:40 | 27.8 |
| 27 38'45.5 S | 52 16'19.1 W | 2019-10-13 18:50 | 27.8 |
| 27 38'45.5 S | 52 16'19.1 W | 2019-10-13 19:00 | 27.6 |
| 27 38'45.5 S | 52 16'19.1 W | 2019-10-13 19:10 | 27.3 |
| 27 38'45.5 S | 52 16'19.1 W | 2019-10-13 19:20 | 26.9 |
| 27 38'45.5 S | 52 16'19.1 W | 2019-10-13 19:30 | 25.8 |
| 27 38'45.5 S | 52 16'19.1 W | 2019-10-13 19:40 | 24.7 |
| 27 38'45.5 S | 52 16'19.1 W | 2019-10-13 19:50 | 24.2 |
| 27 38'45.5 S | 52 16'19.1 W | 2019-10-13 20:00 | 24   |
| 27 38'45.5 S | 52 16'19.1 W | 2019-10-13 20:10 | 23.9 |
| 27 38'45.5 S | 52 16'19.1 W | 2019-10-13 20:20 | 23.6 |
| 27 38'45.5 S | 52 16'19.1 W | 2019-10-13 20:30 | 23.4 |
| 27 38'45.5 S | 52 16'19.1 W | 2019-10-13 20:40 | 23.2 |
| 27 38'45.5 S | 52 16'19.1 W | 2019-10-13 20:50 | 22.9 |
| 27 38'45.5 S | 52 16'19.1 W | 2019-10-13 21:00 | 22.7 |
| 27 38'45.5 S | 52 16'19.1 W | 2019-10-13 21:10 | 22.4 |
| 27 38'45.5 S | 52 16'19.1 W | 2019-10-13 21:20 | 22.4 |
| 27 38'45.5 S | 52 16'19.1 W | 2019-10-13 21:30 | 22.3 |
| 27 38'45.5 S | 52 16'19.1 W | 2019-10-13 21:40 | 22.1 |
| 27 38'45.5 S | 52 16'19.1 W | 2019-10-13 21:50 | 22   |
| 27 38'45.5 S | 52 16'19.1 W | 2019-10-13 22:00 | 21.9 |
| 27 38'45.5 S | 52 16'19.1 W | 2019-10-13 22:10 | 22   |
| 27 38'45.5 S | 52 16'19.1 W | 2019-10-13 22:20 | 21.9 |
| 27 38'45.5 S | 52 16'19.1 W | 2019-10-13 22:30 | 21.6 |
| 27 38'45.5 S | 52 16'19.1 W | 2019-10-13 22:40 | 21.4 |
| 27 38'45.5 S | 52 16'19.1 W | 2019-10-13 22:50 | 21.1 |
| 27 38'45.5 S | 52 16'19.1 W | 2019-10-13 23:00 | 20.8 |
| 27 38'45.5 S | 52 16'19.1 W | 2019-10-13 23:10 | 20.8 |
| 27 38'45.5 S | 52 16'19.1 W | 2019-10-13 23:20 | 20.7 |
| 27 38'45.5 S | 52 16'19.1 W | 2019-10-13 23:30 | 20.6 |
| 27 38'45.5 S | 52 16'19.1 W | 2019-10-13 23:40 | 20.4 |
| 27 38'45.5 S | 52 16'19.1 W | 2019-10-13 23:50 | 20.3 |
| 27 38'45.5 S | 52 16'19.1 W | 2019-10-14 00:00 | 20.3 |
| 27 38'45.5 S | 52 16'19.1 W | 2019-10-14 00:10 | 20.3 |

[illegible]











































































|              |              |                  |      |
|--------------|--------------|------------------|------|
| 27 38'45.5 S | 52 16'19.1 W | 2019-10-20 07:50 | 10.3 |
| 27 38'45.5 S | 52 16'19.1 W | 2019-10-20 08:00 | 11.7 |
| 27 38'45.5 S | 52 16'19.1 W | 2019-10-20 08:10 | 12.6 |
| 27 38'45.5 S | 52 16'19.1 W | 2019-10-20 08:20 | 13.4 |
| 27 38'45.5 S | 52 16'19.1 W | 2019-10-20 08:30 | 14.6 |
| 27 38'45.5 S | 52 16'19.1 W | 2019-10-20 08:40 | 14.6 |
| 27 38'45.5 S | 52 16'19.1 W | 2019-10-20 08:50 | 14.9 |
| 27 38'45.5 S | 52 16'19.1 W | 2019-10-20 09:00 | 15.8 |
| 27 38'45.5 S | 52 16'19.1 W | 2019-10-20 09:10 | 15.9 |
| 27 38'45.5 S | 52 16'19.1 W | 2019-10-20 09:30 | 16.9 |
| 27 38'45.5 S | 52 16'19.1 W | 2019-10-20 09:40 | 17.5 |
| 27 38'45.5 S | 52 16'19.1 W | 2019-10-20 09:50 | 17.9 |
| 27 38'45.5 S | 52 16'19.1 W | 2019-10-20 10:00 | 18.7 |
| 27 38'45.5 S | 52 16'19.1 W | 2019-10-20 10:10 | 18.9 |
| 27 38'45.5 S | 52 16'19.1 W | 2019-10-20 10:20 | 19.3 |
| 27 38'45.5 S | 52 16'19.1 W | 2019-10-20 10:30 | 19.5 |
| 27 38'45.5 S | 52 16'19.1 W | 2019-10-20 10:40 | 19.9 |
| 27 38'45.5 S | 52 16'19.1 W | 2019-10-20 10:50 | 20.9 |
| 27 38'45.5 S | 52 16'19.1 W | 2019-10-20 11:00 | 21   |
| 27 38'45.5 S | 52 16'19.1 W | 2019-10-20 11:10 | 21.6 |
| 27 38'45.5 S | 52 16'19.1 W | 2019-10-20 11:20 | 21.8 |
| 27 38'45.5 S | 52 16'19.1 W | 2019-10-20 11:30 | 22.7 |
| 27 38'45.5 S | 52 16'19.1 W | 2019-10-20 11:40 | 23.1 |
| 27 38'45.5 S | 52 16'19.1 W | 2019-10-20 11:50 | 23.3 |
| 27 38'45.5 S | 52 16'19.1 W | 2019-10-20 12:10 | 25.3 |
| 27 38'45.5 S | 52 16'19.1 W | 2019-10-20 12:20 | 25.4 |
| 27 38'45.5 S | 52 16'19.1 W | 2019-10-20 12:30 | 25.8 |
| 27 38'45.5 S | 52 16'19.1 W | 2019-10-20 12:30 | 25.2 |
| 27 38'45.5 S | 52 16'19.1 W | 2019-10-20 12:40 | 26.2 |
| 27 38'45.5 S | 52 16'19.1 W | 2019-10-20 12:40 | 25.6 |
| 27 38'45.5 S | 52 16'19.1 W | 2019-10-20 12:50 | 25.4 |
| 27 38'45.5 S | 52 16'19.1 W | 2019-10-20 12:50 | 25.4 |
| 27 38'45.5 S | 52 16'19.1 W | 2019-10-20 13:00 | 26.7 |
| 27 38'45.5 S | 52 16'19.1 W | 2019-10-20 13:00 | 24.4 |
| 27 38'45.5 S | 52 16'19.1 W | 2019-10-20 13:10 | 25.9 |
| 27 38'45.5 S | 52 16'19.1 W | 2019-10-20 13:10 | 23.9 |
| 27 38'45.5 S | 52 16'19.1 W | 2019-10-20 13:20 | 25.4 |
| 27 38'45.5 S | 52 16'19.1 W | 2019-10-20 13:20 | 23.4 |
| 27 38'45.5 S | 52 16'19.1 W | 2019-10-20 13:30 | 25.3 |
| 27 38'45.5 S | 52 16'19.1 W | 2019-10-20 13:30 | 23.4 |
| 27 38'45.5 S | 52 16'19.1 W | 2019-10-20 13:40 | 25.4 |
| 27 38'45.5 S | 52 16'19.1 W | 2019-10-20 13:40 | 23.9 |
| 27 38'45.5 S | 52 16'19.1 W | 2019-10-20 13:50 | 25.3 |
| 27 38'45.5 S | 52 16'19.1 W | 2019-10-20 13:50 | 23.6 |
| 27 38'45.5 S | 52 16'19.1 W | 2019-10-20 14:00 | 24.9 |
| 27 38'45.5 S | 52 16'19.1 W | 2019-10-20 14:00 | 23.9 |
| 27 38'45.5 S | 52 16'19.1 W | 2019-10-20 14:10 | 25.4 |
| 27 38'45.5 S | 52 16'19.1 W | 2019-10-20 14:10 | 24.3 |
| 27 38'45.5 S | 52 16'19.1 W | 2019-10-20 14:20 | 25   |
| 27 38'45.5 S | 52 16'19.1 W | 2019-10-20 14:20 | 24.6 |

[illegible]



|              |              |                  |      |
|--------------|--------------|------------------|------|
| 27 38'45.5 S | 52 16'19.1 W | 2019-10-20 14:30 | 24.7 |
| 27 38'45.5 S | 52 16'19.1 W | 2019-10-20 16:40 | 25.2 |
| 27 38'45.5 S | 52 16'19.1 W | 2019-10-20 16:50 | 25.2 |
| 27 38'45.5 S | 52 16'19.1 W | 2019-10-20 17:00 | 24.6 |
| 27 38'45.5 S | 52 16'19.1 W | 2019-10-20 17:10 | 24.8 |
| 27 38'45.5 S | 52 16'19.1 W | 2019-10-20 17:20 | 25.3 |
| 27 38'45.5 S | 52 16'19.1 W | 2019-10-20 17:30 | 24.6 |
| 27 38'45.5 S | 52 16'19.1 W | 2019-10-20 17:40 | 24.4 |
| 27 38'45.5 S | 52 16'19.1 W | 2019-10-20 17:50 | 24.7 |
| 27 38'45.5 S | 52 16'19.1 W | 2019-10-20 18:00 | 24.1 |
| 27 38'45.5 S | 52 16'19.1 W | 2019-10-20 18:10 | 24.1 |
| 27 38'45.5 S | 52 16'19.1 W | 2019-10-20 18:20 | 23.6 |
| 27 38'45.5 S | 52 16'19.1 W | 2019-10-20 18:30 | 23.3 |
| 27 38'45.5 S | 52 16'19.1 W | 2019-10-20 18:40 | 23.1 |
| 27 38'45.5 S | 52 16'19.1 W | 2019-10-20 18:50 | 22.8 |
| 27 38'45.5 S | 52 16'19.1 W | 2019-10-20 19:00 | 22.6 |
| 27 38'45.5 S | 52 16'19.1 W | 2019-10-20 19:10 | 22.4 |
| 27 38'45.5 S | 52 16'19.1 W | 2019-10-20 19:20 | 22.4 |
| 27 38'45.5 S | 52 16'19.1 W | 2019-10-20 19:30 | 22.2 |
| 27 38'45.5 S | 52 16'19.1 W | 2019-10-20 19:40 | 21.9 |
| 27 38'45.5 S | 52 16'19.1 W | 2019-10-20 19:50 | 21.8 |
| 27 38'45.5 S | 52 16'19.1 W | 2019-10-20 20:00 | 21.7 |
| 27 38'45.5 S | 52 16'19.1 W | 2019-10-20 20:10 | 21.4 |
| 27 38'45.5 S | 52 16'19.1 W | 2019-10-20 20:20 | 21.1 |
| 27 38'45.5 S | 52 16'19.1 W | 2019-10-20 20:30 | 20.6 |
| 27 38'45.5 S | 52 16'19.1 W | 2019-10-20 20:40 | 19.9 |
| 27 38'45.5 S | 52 16'19.1 W | 2019-10-20 20:50 | 19.3 |
| 27 38'45.5 S | 52 16'19.1 W | 2019-10-20 21:00 | 19.1 |
| 27 38'45.5 S | 52 16'19.1 W | 2019-10-20 21:10 | 19.3 |
| 27 38'45.5 S | 52 16'19.1 W | 2019-10-20 21:20 | 19.6 |
| 27 38'45.5 S | 52 16'19.1 W | 2019-10-20 21:30 | 19.4 |
| 27 38'45.5 S | 52 16'19.1 W | 2019-10-20 21:40 | 19.3 |
| 27 38'45.5 S | 52 16'19.1 W | 2019-10-20 21:50 | 18.9 |
| 27 38'45.5 S | 52 16'19.1 W | 2019-10-20 22:00 | 18.8 |
| 27 38'45.5 S | 52 16'19.1 W | 2019-10-20 22:10 | 18.8 |
| 27 38'45.5 S | 52 16'19.1 W | 2019-10-20 22:20 | 17.6 |
| 27 38'45.5 S | 52 16'19.1 W | 2019-10-20 22:30 | 17.3 |
| 27 38'45.5 S | 52 16'19.1 W | 2019-10-20 22:40 | 17.1 |
| 27 38'45.5 S | 52 16'19.1 W | 2019-10-20 22:50 | 16.8 |
| 27 38'45.5 S | 52 16'19.1 W | 2019-10-20 23:00 | 16.3 |
| 27 38'45.5 S | 52 16'19.1 W | 2019-10-20 23:10 | 16.1 |
| 27 38'45.5 S | 52 16'19.1 W | 2019-10-20 23:20 | 16.1 |
| 27 38'45.5 S | 52 16'19.1 W | 2019-10-20 23:30 | 16.2 |
| 27 38'45.5 S | 52 16'19.1 W | 2019-10-20 23:40 | 16.1 |
| 27 38'45.5 S | 52 16'19.1 W | 2019-10-20 23:50 | 16   |
| 27 38'45.5 S | 52 16'19.1 W | 2019-10-21 00:00 | 16.1 |
| 27 38'45.5 S | 52 16'19.1 W | 2019-10-21 00:10 | 15.9 |
| 27 38'45.5 S | 52 16'19.1 W | 2019-10-21 00:20 | 15.8 |
| 27 38'45.5 S | 52 16'19.1 W | 2019-10-21 00:30 | 15.4 |
| 27 38'45.5 S | 52 16'19.1 W | 2019-10-21 00:40 | 15.4 |

[illegible]















































|              |              |                  |      |
|--------------|--------------|------------------|------|
| 27 38'45.5 S | 52 16'19.1 W | 2019-10-24 20:20 | 20.2 |
| 27 38'45.5 S | 52 16'19.1 W | 2019-10-24 20:30 | 19.9 |
| 27 38'45.5 S | 52 16'19.1 W | 2019-10-24 20:40 | 19.9 |
| 27 38'45.5 S | 52 16'19.1 W | 2019-10-24 20:50 | 19.3 |
| 27 38'45.5 S | 52 16'19.1 W | 2019-10-24 21:00 | 18.6 |
| 27 38'45.5 S | 52 16'19.1 W | 2019-10-24 21:10 | 18.5 |
| 27 38'45.5 S | 52 16'19.1 W | 2019-10-24 21:20 | 19.1 |
| 27 38'45.5 S | 52 16'19.1 W | 2019-10-24 21:30 | 18.6 |
| 27 38'45.5 S | 52 16'19.1 W | 2019-10-24 21:40 | 18.6 |
| 27 38'45.5 S | 52 16'19.1 W | 2019-10-24 21:50 | 18.3 |
| 27 38'45.5 S | 52 16'19.1 W | 2019-10-24 22:00 | 18.2 |
| 27 38'45.5 S | 52 16'19.1 W | 2019-10-24 22:10 | 18.1 |
| 27 38'45.5 S | 52 16'19.1 W | 2019-10-24 22:20 | 17.9 |
| 27 38'45.5 S | 52 16'19.1 W | 2019-10-24 22:30 | 17.8 |
| 27 38'45.5 S | 52 16'19.1 W | 2019-10-24 22:40 | 17.7 |
| 27 38'45.5 S | 52 16'19.1 W | 2019-10-24 22:50 | 17.4 |
| 27 38'45.5 S | 52 16'19.1 W | 2019-10-24 23:00 | 17.4 |
| 27 38'45.5 S | 52 16'19.1 W | 2019-10-24 23:10 | 17.3 |
| 27 38'45.5 S | 52 16'19.1 W | 2019-10-24 23:20 | 16.9 |
| 27 38'45.5 S | 52 16'19.1 W | 2019-10-24 23:30 | 16.8 |
| 27 38'45.5 S | 52 16'19.1 W | 2019-10-24 23:40 | 16.5 |
| 27 38'45.5 S | 52 16'19.1 W | 2019-10-24 23:50 | 16.4 |
| 27 38'45.5 S | 52 16'19.1 W | 2019-10-25 00:00 | 16.3 |
| 27 38'45.5 S | 52 16'19.1 W | 2019-10-25 00:10 | 16.1 |
| 27 38'45.5 S | 52 16'19.1 W | 2019-10-25 00:20 | 15.9 |
| 27 38'45.5 S | 52 16'19.1 W | 2019-10-25 00:30 | 15.6 |
| 27 38'45.5 S | 52 16'19.1 W | 2019-10-25 00:40 | 15.4 |
| 27 38'45.5 S | 52 16'19.1 W | 2019-10-25 00:40 | 15.4 |
| 27 38'45.5 S | 52 16'19.1 W | 2019-10-25 00:50 | 15.3 |
| 27 38'45.5 S | 52 16'19.1 W | 2019-10-25 01:00 | 15.1 |
| 27 38'45.5 S | 52 16'19.1 W | 2019-10-25 01:10 | 15   |
| 27 38'45.5 S | 52 16'19.1 W | 2019-10-25 01:20 | 15   |
| 27 38'45.5 S | 52 16'19.1 W | 2019-10-25 01:30 | 14.9 |
| 27 38'45.5 S | 52 16'19.1 W | 2019-10-25 01:40 | 14.9 |
| 27 38'45.5 S | 52 16'19.1 W | 2019-10-25 01:50 | 14.9 |
| 27 38'45.5 S | 52 16'19.1 W | 2019-10-25 02:00 | 14.9 |
| 27 38'45.5 S | 52 16'19.1 W | 2019-10-25 02:10 | 14.7 |
| 27 38'45.5 S | 52 16'19.1 W | 2019-10-25 02:20 | 14.6 |
| 27 38'45.5 S | 52 16'19.1 W | 2019-10-25 02:30 | 14.3 |
| 27 38'45.5 S | 52 16'19.1 W | 2019-10-25 02:40 | 14.2 |
| 27 38'45.5 S | 52 16'19.1 W | 2019-10-25 02:50 | 13.9 |
| 27 38'45.5 S | 52 16'19.1 W | 2019-10-25 03:00 | 13.9 |
| 27 38'45.5 S | 52 16'19.1 W | 2019-10-25 03:10 | 13.9 |
| 27 38'45.5 S | 52 16'19.1 W | 2019-10-25 03:30 | 13.7 |
| 27 38'45.5 S | 52 16'19.1 W | 2019-10-25 03:40 | 13.9 |
| 27 38'45.5 S | 52 16'19.1 W | 2019-10-25 03:50 | 13.8 |
| 27 38'45.5 S | 52 16'19.1 W | 2019-10-25 04:00 | 13.7 |
| 27 38'45.5 S | 52 16'19.1 W | 2019-10-25 04:10 | 13.4 |
| 27 38'45.5 S | 52 16'19.1 W | 2019-10-25 04:20 | 13.3 |
| 27 38'45.5 S | 52 16'19.1 W | 2019-10-25 04:30 | 13.5 |

[illegible]



















|              |              |                  |      |
|--------------|--------------|------------------|------|
| 27 38'45.5 S | 52 16'19.1 W | 2019-10-26 16:30 | 32.6 |
| 27 38'45.5 S | 52 16'19.1 W | 2019-10-26 16:40 | 32.8 |
| 27 38'45.5 S | 52 16'19.1 W | 2019-10-26 16:50 | 33.1 |
| 27 38'45.5 S | 52 16'19.1 W | 2019-10-26 17:00 | 32.9 |
| 27 38'45.5 S | 52 16'19.1 W | 2019-10-26 17:10 | 33.2 |
| 27 38'45.5 S | 52 16'19.1 W | 2019-10-26 17:20 | 32.3 |
| 27 38'45.5 S | 52 16'19.1 W | 2019-10-26 17:30 | 32.4 |
| 27 38'45.5 S | 52 16'19.1 W | 2019-10-26 17:40 | 31.6 |
| 27 38'45.5 S | 52 16'19.1 W | 2019-10-26 17:50 | 31.1 |
| 27 38'45.5 S | 52 16'19.1 W | 2019-10-26 18:00 | 31.1 |
| 27 38'45.5 S | 52 16'19.1 W | 2019-10-26 18:10 | 29.6 |
| 27 38'45.5 S | 52 16'19.1 W | 2019-10-26 18:20 | 28.9 |
| 27 38'45.5 S | 52 16'19.1 W | 2019-10-26 18:30 | 28.4 |
| 27 38'45.5 S | 52 16'19.1 W | 2019-10-26 18:40 | 27.8 |
| 27 38'45.5 S | 52 16'19.1 W | 2019-10-26 18:50 | 27.5 |
| 27 38'45.5 S | 52 16'19.1 W | 2019-10-26 19:00 | 27.1 |
| 27 38'45.5 S | 52 16'19.1 W | 2019-10-26 19:10 | 27.1 |
| 27 38'45.5 S | 52 16'19.1 W | 2019-10-26 19:20 | 27   |
| 27 38'45.5 S | 52 16'19.1 W | 2019-10-26 19:30 | 26.9 |
| 27 38'45.5 S | 52 16'19.1 W | 2019-10-26 19:40 | 26.8 |
| 27 38'45.5 S | 52 16'19.1 W | 2019-10-26 19:50 | 26.6 |
| 27 38'45.5 S | 52 16'19.1 W | 2019-10-26 20:00 | 26.1 |
| 27 38'45.5 S | 52 16'19.1 W | 2019-10-26 20:10 | 26   |
| 27 38'45.5 S | 52 16'19.1 W | 2019-10-26 20:20 | 25.8 |
| 27 38'45.5 S | 52 16'19.1 W | 2019-10-26 20:30 | 25.8 |
| 27 38'45.5 S | 52 16'19.1 W | 2019-10-26 20:40 | 25.6 |
| 27 38'45.5 S | 52 16'19.1 W | 2019-10-26 20:50 | 25.3 |
| 27 38'45.5 S | 52 16'19.1 W | 2019-10-26 21:00 | 25.4 |
| 27 38'45.5 S | 52 16'19.1 W | 2019-10-26 21:10 | 25.3 |
| 27 38'45.5 S | 52 16'19.1 W | 2019-10-26 21:20 | 25   |
| 27 38'45.5 S | 52 16'19.1 W | 2019-10-26 21:30 | 24.6 |
| 27 38'45.5 S | 52 16'19.1 W | 2019-10-26 21:40 | 24.1 |
| 27 38'45.5 S | 52 16'19.1 W | 2019-10-26 21:50 | 23.8 |
| 27 38'45.5 S | 52 16'19.1 W | 2019-10-26 22:00 | 23.3 |
| 27 38'45.5 S | 52 16'19.1 W | 2019-10-26 22:10 | 23.2 |
| 27 38'45.5 S | 52 16'19.1 W | 2019-10-26 22:20 | 23.1 |
| 27 38'45.5 S | 52 16'19.1 W | 2019-10-26 22:30 | 22.8 |
| 27 38'45.5 S | 52 16'19.1 W | 2019-10-26 22:40 | 22.7 |
| 27 38'45.5 S | 52 16'19.1 W | 2019-10-26 22:50 | 22.6 |
| 27 38'45.5 S | 52 16'19.1 W | 2019-10-26 23:00 | 22.4 |
| 27 38'45.5 S | 52 16'19.1 W | 2019-10-26 23:10 | 22.3 |
| 27 38'45.5 S | 52 16'19.1 W | 2019-10-26 23:20 | 22.2 |
| 27 38'45.5 S | 52 16'19.1 W | 2019-10-26 23:30 | 22.1 |
| 27 38'45.5 S | 52 16'19.1 W | 2019-10-26 23:40 | 21.9 |
| 27 38'45.5 S | 52 16'19.1 W | 2019-10-26 23:50 | 21.9 |
| 27 38'45.5 S | 52 16'19.1 W | 2019-10-27 00:00 | 21.8 |
| 27 38'45.5 S | 52 16'19.1 W | 2019-10-27 00:10 | 21.7 |
| 27 38'45.5 S | 52 16'19.1 W | 2019-10-27 00:20 | 21.6 |
| 27 38'45.5 S | 52 16'19.1 W | 2019-10-27 00:30 | 21.4 |
| 27 38'45.5 S | 52 16'19.1 W | 2019-10-27 00:40 | 21.3 |

[illegible]



































































|              |              |                  |      |
|--------------|--------------|------------------|------|
| 27 38'45.5 S | 52 16'19.1 W | 2019-11-01 20:50 | 23   |
| 27 38'45.5 S | 52 16'19.1 W | 2019-11-01 21:00 | 22.8 |
| 27 38'45.5 S | 52 16'19.1 W | 2019-11-01 21:10 | 22.6 |
| 27 38'45.5 S | 52 16'19.1 W | 2019-11-01 21:20 | 22.4 |
| 27 38'45.5 S | 52 16'19.1 W | 2019-11-01 21:30 | 22.3 |
| 27 38'45.5 S | 52 16'19.1 W | 2019-11-01 21:40 | 22.1 |
| 27 38'45.5 S | 52 16'19.1 W | 2019-11-01 21:50 | 21.9 |
| 27 38'45.5 S | 52 16'19.1 W | 2019-11-01 22:00 | 21.9 |
| 27 38'45.5 S | 52 16'19.1 W | 2019-11-01 22:10 | 21.  |
| 27 38'45.5 S | 52 16'19.1 W | 2019-11-01 22:20 | 21.4 |
| 27 38'45.5 S | 52 16'19.1 W | 2019-11-01 22:30 | 21.3 |
| 27 38'45.5 S | 52 16'19.1 W | 2019-11-01 22:40 | 21.1 |
| 27 38'45.5 S | 52 16'19.1 W | 2019-11-01 22:50 | 21   |
| 27 38'45.5 S | 52 16'19.1 W | 2019-11-01 23:00 | 20.9 |
| 27 38'45.5 S | 52 16'19.1 W | 2019-11-01 23:10 | 20.8 |
| 27 38'45.5 S | 52 16'19.1 W | 2019-11-01 23:20 | 20.7 |
| 27 38'45.5 S | 52 16'19.1 W | 2019-11-01 23:30 | 20.6 |
| 27 38'45.5 S | 52 16'19.1 W | 2019-11-01 23:40 | 20.5 |
| 27 38'45.5 S | 52 16'19.1 W | 2019-11-01 23:50 | 20.4 |
| 27 38'45.5 S | 52 16'19.1 W | 2019-11-02 00:00 | 20.2 |
| 27 38'45.5 S | 52 16'19.1 W | 2019-11-02 00:10 | 20.1 |
| 27 38'45.5 S | 52 16'19.1 W | 2019-11-02 00:20 | 20   |
| 27 38'45.5 S | 52 16'19.1 W | 2019-11-02 00:30 | 19.9 |
| 27 38'45.5 S | 52 16'19.1 W | 2019-11-02 00:40 | 19.8 |
| 27 38'45.5 S | 52 16'19.1 W | 2019-11-02 00:50 | 19.7 |
| 27 38'45.5 S | 52 16'19.1 W | 2019-11-02 01:00 | 19.6 |
| 27 38'45.5 S | 52 16'19.1 W | 2019-11-02 01:10 | 19.4 |
| 27 38'45.5 S | 52 16'19.1 W | 2019-11-02 01:20 | 19.3 |
| 27 38'45.5 S | 52 16'19.1 W | 2019-11-02 01:30 | 19.3 |
| 27 38'45.5 S | 52 16'19.1 W | 2019-11-02 01:40 | 19.1 |
| 27 38'45.5 S | 52 16'19.1 W | 2019-11-02 01:50 | 18.9 |
| 27 38'45.5 S | 52 16'19.1 W | 2019-11-02 02:00 | 18.8 |
| 27 38'45.5 S | 52 16'19.1 W | 2019-11-02 02:10 | 18.6 |
| 27 38'45.5 S | 52 16'19.1 W | 2019-11-02 02:20 | 18.5 |
| 27 38'45.5 S | 52 16'19.1 W | 2019-11-02 02:30 | 18.4 |
| 27 38'45.5 S | 52 16'19.1 W | 2019-11-02 02:40 | 18.3 |
| 27 38'45.5 S | 52 16'19.1 W | 2019-11-02 02:50 | 18.1 |
| 27 38'45.5 S | 52 16'19.1 W | 2019-11-02 03:00 | 18.1 |
| 27 38'45.5 S | 52 16'19.1 W | 2019-11-02 03:10 | 17.9 |
| 27 38'45.5 S | 52 16'19.1 W | 2019-11-02 03:20 | 17.9 |
| 27 38'45.5 S | 52 16'19.1 W | 2019-11-02 03:30 | 17.9 |
| 27 38'45.5 S | 52 16'19.1 W | 2019-11-02 03:40 | 18.1 |
| 27 38'45.5 S | 52 16'19.1 W | 2019-11-02 03:50 | 18.1 |
| 27 38'45.5 S | 52 16'19.1 W | 2019-11-02 04:00 | 18.1 |
| 27 38'45.5 S | 52 16'19.1 W | 2019-11-02 04:10 | 18.1 |
| 27 38'45.5 S | 52 16'19.1 W | 2019-11-02 04:20 | 17.9 |
| 27 38'45.5 S | 52 16'19.1 W | 2019-11-02 04:30 | 17.9 |
| 27 38'45.5 S | 52 16'19.1 W | 2019-11-02 04:40 | 17.8 |
| 27 38'45.5 S | 52 16'19.1 W | 2019-11-02 04:50 | 17.8 |
| 27 38'45.5 S | 52 16'19.1 W | 2019-11-02 05:00 | 17.8 |

[illegible]











































































|              |              |                  |      |
|--------------|--------------|------------------|------|
| 27 38'45.5 S | 52 16'19.1 W | 2019-11-08 11:40 | 24.8 |
| 27 38'45.5 S | 52 16'19.1 W | 2019-11-08 11:50 | 25.3 |
| 27 38'45.5 S | 52 16'19.1 W | 2019-11-08 12:00 | 24.7 |
| 27 38'45.5 S | 52 16'19.1 W | 2019-11-08 12:10 | 25.8 |
| 27 38'45.5 S | 52 16'19.1 W | 2019-11-08 12:20 | 25.6 |
| 27 38'45.5 S | 52 16'19.1 W | 2019-11-08 12:30 | 26.3 |
| 27 38'45.5 S | 52 16'19.1 W | 2019-11-08 12:40 | 26.4 |
| 27 38'45.5 S | 52 16'19.1 W | 2019-11-08 12:50 | 26.6 |
| 27 38'45.5 S | 52 16'19.1 W | 2019-11-08 13:00 | 27.1 |
| 27 38'45.5 S | 52 16'19.1 W | 2019-11-08 13:10 | 28.3 |
| 27 38'45.5 S | 52 16'19.1 W | 2019-11-08 13:20 | 28.8 |
| 27 38'45.5 S | 52 16'19.1 W | 2019-11-08 13:30 | 27.9 |
| 27 38'45.5 S | 52 16'19.1 W | 2019-11-08 13:40 | 29.2 |
| 27 38'45.5 S | 52 16'19.1 W | 2019-11-08 13:50 | 30.3 |
| 27 38'45.5 S | 52 16'19.1 W | 2019-11-08 14:00 | 30.4 |
| 27 38'45.5 S | 52 16'19.1 W | 2019-11-08 14:10 | 30   |
| 27 38'45.5 S | 52 16'19.1 W | 2019-11-08 14:20 | 30.1 |
| 27 38'45.5 S | 52 16'19.1 W | 2019-11-08 14:30 | 29.4 |
| 27 38'45.5 S | 52 16'19.1 W | 2019-11-08 14:40 | 30.4 |
| 27 38'45.5 S | 52 16'19.1 W | 2019-11-08 14:50 | 30.3 |
| 27 38'45.5 S | 52 16'19.1 W | 2019-11-08 15:00 | 31   |
| 27 38'45.5 S | 52 16'19.1 W | 2019-11-08 15:10 | 30.3 |
| 27 38'45.5 S | 52 16'19.1 W | 2019-11-08 15:20 | 31.1 |
| 27 38'45.5 S | 52 16'19.1 W | 2019-11-08 15:30 | 30.4 |
| 27 38'45.5 S | 52 16'19.1 W | 2019-11-08 15:40 | 30.9 |
| 27 38'45.5 S | 52 16'19.1 W | 2019-11-08 15:50 | 30.9 |
| 27 38'45.5 S | 52 16'19.1 W | 2019-11-08 16:00 | 31.6 |
| 27 38'45.5 S | 52 16'19.1 W | 2019-11-08 16:10 | 30.7 |
| 27 38'45.5 S | 52 16'19.1 W | 2019-11-08 16:20 | 31.1 |
| 27 38'45.5 S | 52 16'19.1 W | 2019-11-08 16:30 | 30.2 |
| 27 38'45.5 S | 52 16'19.1 W | 2019-11-08 16:40 | 30.2 |
| 27 38'45.5 S | 52 16'19.1 W | 2019-11-08 16:50 | 30.8 |
| 27 38'45.5 S | 52 16'19.1 W | 2019-11-08 17:00 | 30.6 |
| 27 38'45.5 S | 52 16'19.1 W | 2019-11-08 17:10 | 30.1 |
| 27 38'45.5 S | 52 16'19.1 W | 2019-11-08 17:20 | 30.2 |
| 27 38'45.5 S | 52 16'19.1 W | 2019-11-08 17:30 | 29.3 |
| 27 38'45.5 S | 52 16'19.1 W | 2019-11-08 17:40 | 28.9 |
| 27 38'45.5 S | 52 16'19.1 W | 2019-11-08 17:50 | 28.4 |
| 27 38'45.5 S | 52 16'19.1 W | 2019-11-08 18:00 | 27.9 |
| 27 38'45.5 S | 52 16'19.1 W | 2019-11-08 18:10 | 28.1 |
| 27 38'45.5 S | 52 16'19.1 W | 2019-11-08 18:20 | 27.2 |
| 27 38'45.5 S | 52 16'19.1 W | 2019-11-08 18:30 | 26.6 |
| 27 38'45.5 S | 52 16'19.1 W | 2019-11-08 18:40 | 25.6 |
| 27 38'45.5 S | 52 16'19.1 W | 2019-11-08 18:50 | 25   |
| 27 38'45.5 S | 52 16'19.1 W | 2019-11-08 19:00 | 24.4 |
| 27 38'45.5 S | 52 16'19.1 W | 2019-11-08 19:10 | 24   |
| 27 38'45.5 S | 52 16'19.1 W | 2019-11-08 19:20 | 23.8 |
| 27 38'45.5 S | 52 16'19.1 W | 2019-11-08 19:30 | 23.8 |
| 27 38'45.5 S | 52 16'19.1 W | 2019-11-08 19:40 | 23.8 |
| 27 38'45.5 S | 52 16'19.1 W | 2019-11-08 19:50 | 23.6 |

[illegible]











































|              |              |                  |      |
|--------------|--------------|------------------|------|
| 27 38'45.5 S | 52 16'19.1 W | 2019-11-12 08:30 | 20.6 |
| 27 38'45.5 S | 52 16'19.1 W | 2019-11-12 08:40 | 20.4 |
| 27 38'45.5 S | 52 16'19.1 W | 2019-11-12 08:50 | 21.2 |
| 27 38'45.5 S | 52 16'19.1 W | 2019-11-12 09:00 | 21.4 |
| 27 38'45.5 S | 52 16'19.1 W | 2019-11-12 09:10 | 21.4 |
| 27 38'45.5 S | 52 16'19.1 W | 2019-11-12 09:20 | 21.4 |
| 27 38'45.5 S | 52 16'19.1 W | 2019-11-12 09:30 | 22.3 |
| 27 38'45.5 S | 52 16'19.1 W | 2019-11-12 09:40 | 22.3 |
| 27 38'45.5 S | 52 16'19.1 W | 2019-11-12 09:50 | 22.  |
| 27 38'45.5 S | 52 16'19.1 W | 2019-11-12 10:00 | 22.8 |
| 27 38'45.5 S | 52 16'19.1 W | 2019-11-12 10:10 | 22.8 |
| 27 38'45.5 S | 52 16'19.1 W | 2019-11-12 10:20 | 22.7 |
| 27 38'45.5 S | 52 16'19.1 W | 2019-11-12 10:30 | 22.9 |
| 27 38'45.5 S | 52 16'19.1 W | 2019-11-12 10:40 | 23.4 |
| 27 38'45.5 S | 52 16'19.1 W | 2019-11-12 10:50 | 23.9 |
| 27 38'45.5 S | 52 16'19.1 W | 2019-11-12 11:00 | 24.9 |
| 27 38'45.5 S | 52 16'19.1 W | 2019-11-12 11:10 | 24.8 |
| 27 38'45.5 S | 52 16'19.1 W | 2019-11-12 11:20 | 25.1 |
| 27 38'45.5 S | 52 16'19.1 W | 2019-11-12 11:30 | 25.9 |
| 27 38'45.5 S | 52 16'19.1 W | 2019-11-12 11:40 | 26.2 |
| 27 38'45.5 S | 52 16'19.1 W | 2019-11-12 11:50 | 27.3 |
| 27 38'45.5 S | 52 16'19.1 W | 2019-11-12 12:00 | 28   |
| 27 38'45.5 S | 52 16'19.1 W | 2019-11-12 12:10 | 27.6 |
| 27 38'45.5 S | 52 16'19.1 W | 2019-11-12 12:20 | 28.9 |
| 27 38'45.5 S | 52 16'19.1 W | 2019-11-12 12:30 | 28.3 |
| 27 38'45.5 S | 52 16'19.1 W | 2019-11-12 12:40 | 29.3 |
| 27 38'45.5 S | 52 16'19.1 W | 2019-11-12 12:50 | 28.9 |
| 27 38'45.5 S | 52 16'19.1 W | 2019-11-12 13:00 | 29.6 |
| 27 38'45.5 S | 52 16'19.1 W | 2019-11-12 13:10 | 27.8 |
| 27 38'45.5 S | 52 16'19.1 W | 2019-11-12 13:20 | 26.8 |
| 27 38'45.5 S | 52 16'19.1 W | 2019-11-12 13:30 | 29.3 |
| 27 38'45.5 S | 52 16'19.1 W | 2019-11-12 13:40 | 29.7 |
| 27 38'45.5 S | 52 16'19.1 W | 2019-11-12 13:50 | 31.6 |
| 27 38'45.5 S | 52 16'19.1 W | 2019-11-12 14:00 | 31.2 |
| 27 38'45.5 S | 52 16'19.1 W | 2019-11-12 14:10 | 30.5 |
| 27 38'45.5 S | 52 16'19.1 W | 2019-11-12 14:10 | 30.6 |
| 27 38'45.5 S | 52 16'19.1 W | 2019-11-12 14:20 | 30.3 |
| 27 38'45.5 S | 52 16'19.1 W | 2019-11-12 14:30 | 32.4 |
| 27 38'45.5 S | 52 16'19.1 W | 2019-11-12 14:40 | 31.8 |
| 27 38'45.5 S | 52 16'19.1 W | 2019-11-12 14:50 | 32.4 |
| 27 38'45.5 S | 52 16'19.1 W | 2019-11-12 15:00 | 31   |
| 27 38'45.5 S | 52 16'19.1 W | 2019-11-12 15:10 | 31.1 |
| 27 38'45.5 S | 52 16'19.1 W | 2019-11-12 15:20 | 31.3 |
| 27 38'45.5 S | 52 16'19.1 W | 2019-11-12 15:30 | 30.9 |
| 27 38'45.5 S | 52 16'19.1 W | 2019-11-12 15:40 | 32.4 |
| 27 38'45.5 S | 52 16'19.1 W | 2019-11-12 15:50 | 31.7 |
| 27 38'45.5 S | 52 16'19.1 W | 2019-11-12 16:00 | 30.9 |
| 27 38'45.5 S | 52 16'19.1 W | 2019-11-12 16:10 | 30.9 |
| 27 38'45.5 S | 52 16'19.1 W | 2019-11-12 16:20 | 31.6 |
| 27 38'45.5 S | 52 16'19.1 W | 2019-11-12 16:30 | 30   |

[illegible]



















































































































































































































|              |              |                  |      |
|--------------|--------------|------------------|------|
| 27 38'45.5 S | 52 16'19.1 W | 2019-11-30 22:00 | 21.2 |
| 27 38'45.5 S | 52 16'19.1 W | 2019-11-30 22:10 | 21.2 |
| 27 38'45.5 S | 52 16'19.1 W | 2019-11-30 22:20 | 21.1 |
| 27 38'45.5 S | 52 16'19.1 W | 2019-11-30 22:30 | 21   |
| 27 38'45.5 S | 52 16'19.1 W | 2019-11-30 22:40 | 21.1 |
| 27 38'45.5 S | 52 16'19.1 W | 2019-11-30 22:50 | 20.9 |
| 27 38'45.5 S | 52 16'19.1 W | 2019-11-30 23:00 | 21.1 |
| 27 38'45.5 S | 52 16'19.1 W | 2019-11-30 23:10 | 21.1 |
| 27 38'45.5 S | 52 16'19.1 W | 2019-11-30 23:20 | 21.1 |
| 27 38'45.5 S | 52 16'19.1 W | 2019-11-30 23:40 | 21.1 |
| 27 38'45.5 S | 52 16'19.1 W | 2019-11-30 23:50 | 21.1 |

[illegible]



| date             | temperature (°C) |
|------------------|------------------|
| 2020-09-01 00:00 | 12.1             |
| 2020-09-01 00:10 | 12.1             |
| 2020-09-01 00:20 | 12.1             |
| 2020-09-01 00:30 | 12.1             |
| 2020-09-01 00:40 | 12.2             |
| 2020-09-01 00:50 | 12.1             |
| 2020-09-01 01:00 | 12.1             |
| 2020-09-01 01:10 | 12               |
| 2020-09-01 01:20 | 12               |
| 2020-09-01 01:30 | 12               |
| 2020-09-01 01:40 | 11.9             |
| 2020-09-01 01:50 | 11.9             |
| 2020-09-01 02:00 | 11.9             |
| 2020-09-01 02:10 | 11.9             |
| 2020-09-01 02:20 | 11.8             |
| 2020-09-01 02:30 | 11.8             |
| 2020-09-01 02:40 | 11.8             |
| 2020-09-01 02:50 | 11.9             |
| 2020-09-01 03:00 | 11.9             |
| 2020-09-01 03:10 | 12.1             |
| 2020-09-01 03:20 | 12.3             |
| 2020-09-01 03:30 | 12.5             |
| 2020-09-01 03:40 | 12.7             |
| 2020-09-01 03:50 | 12.8             |
| 2020-09-01 04:00 | 12.9             |
| 2020-09-01 04:10 | 12.9             |
| 2020-09-01 04:20 | 13               |
| 2020-09-01 04:30 | 12.9             |
| 2020-09-01 04:40 | 13               |
| 2020-09-01 04:50 | 12.9             |
| 2020-09-01 05:00 | 12.9             |
| 2020-09-01 05:10 | 12.8             |
| 2020-09-01 05:20 | 12.8             |
| 2020-09-01 05:30 | 12.8             |
| 2020-09-01 05:40 | 12.8             |
| 2020-09-01 05:50 | 12.8             |
| 2020-09-01 06:00 | 12.8             |
| 2020-09-01 06:10 | 12.8             |
| 2020-09-01 06:20 | 12.8             |
| 2020-09-01 06:30 | 12.8             |
| 2020-09-01 06:40 | 12.8             |
| 2020-09-01 06:50 | 12.9             |
| 2020-09-01 07:00 | 12.9             |
| 2020-09-01 07:10 | 13.1             |
| 2020-09-01 07:20 | 13.4             |
| 2020-09-01 07:30 | 13.6             |
| 2020-09-01 07:40 | 14.1             |
| 2020-09-01 07:50 | 14.9             |

| (2019/Sept– 2019/Nov) |               |
|-----------------------|---------------|
| date                  | rainfall (mm) |
| 2019/9/1              | 0             |
| 2019/9/2              | 0             |
| 2019/9/3              | 0             |
| 2019/9/4              | 0             |
| 2019/9/5              | 0             |
| 2019/9/6              | 9.6           |
| 2019/9/7              | 0             |
| 2019/9/8              | 0             |
| 2019/9/9              | 0             |
| 2019/9/10             | 0             |
| 2019/9/11             | 0             |
| 2019/9/12             | 5.8           |
| 2019/9/13             | 0             |
| 2019/9/14             | 0             |
| 2019/9/15             | 0             |
| 2019/9/16             | 0             |
| 2019/9/17             | 0             |
| 2019/9/18             | 4.8           |
| 2019/9/19             | 20.6          |
| 2019/9/20             | 0             |
| 2019/9/21             | 0             |
| 2019/9/22             | 0             |
| 2019/9/23             | 0             |
| 2019/9/24             | 0             |
| 2019/9/25             | 0             |
| 2019/9/26             | 0             |
| 2019/9/27             | 0             |
| 2019/9/28             | 0             |
| 2019/9/29             | 0             |
| 2019/9/30             | 0             |
| 2019/10/1             | 0             |
| 2019/10/2             | 14.7          |
| 2019/10/3             | 33.3          |
| 2019/10/4             | 0             |
| 2019/10/5             | 25.7          |
| 2019/10/6             | 2.1           |
| 2019/10/7             | 0             |
| 2019/10/8             | 0             |
| 2019/10/9             | 0             |
| 2019/10/10            | 0             |
| 2019/10/11            | 0             |
| 2019/10/12            | 0             |
| 2019/10/13            | 0             |
| 2019/10/14            | 0             |
| 2019/10/15            | 0.7           |
| 2019/10/16            | 0             |
| 2019/10/17            | 9.3           |
| 2019/10/18            | 13            |

| (2020/Sept– 2020/Oct) |
|-----------------------|
| date                  |
| 2020/9/1              |
| 2020/9/2              |
| 2020/9/3              |
| 2020/9/4              |
| 2020/9/5              |
| 2020/9/6              |
| 2020/9/7              |
| 2020/9/8              |
| 2020/9/9              |
| 2020/9/10             |
| 2020/9/11             |
| 2020/9/12             |
| 2020/9/13             |
| 2020/9/14             |
| 2020/9/15             |
| 2020/9/16             |
| 2020/9/17             |
| 2020/9/18             |
| 2020/9/19             |
| 2020/9/20             |
| 2020/9/21             |
| 2020/9/22             |
| 2020/9/23             |
| 2020/9/24             |
| 2020/9/25             |
| 2020/9/26             |
| 2020/9/27             |
| 2020/9/28             |
| 2020/9/29             |
| 2020/9/30             |
| 2020/10/1             |
| 2020/10/2             |
| 2020/10/3             |
| 2020/10/4             |
| 2020/10/5             |
| 2020/10/6             |
| 2020/10/7             |
| 2020/10/8             |
| 2020/10/9             |
| 2020/10/10            |
| 2020/10/11            |
| 2020/10/12            |
| 2020/10/13            |
| 2020/10/14            |
| 2020/10/15            |
| 2020/10/16            |
| 2020/10/17            |
| 2020/10/18            |



|                  |      |
|------------------|------|
| 2020-09-01 08:00 | 15.2 |
| 2020-09-01 08:10 | 15.8 |
| 2020-09-01 08:20 | 16.2 |
| 2020-09-01 08:30 | 16.8 |
| 2020-09-01 08:40 | 17.3 |
| 2020-09-01 08:50 | 17.9 |
| 2020-09-01 09:00 | 18.1 |
| 2020-09-01 09:10 | 17.9 |
| 2020-09-01 09:20 | 18.6 |
| 2020-09-01 09:30 | 18.6 |
| 2020-09-01 09:40 | 19.2 |
| 2020-09-01 09:50 | 19.3 |
| 2020-09-01 10:00 | 19.8 |
| 2020-09-01 10:10 | 20.3 |
| 2020-09-01 10:20 | 21.1 |
| 2020-09-01 10:30 | 21.3 |
| 2020-09-01 10:40 | 22.1 |
| 2020-09-01 10:50 | 22.1 |
| 2020-09-01 11:00 | 21.6 |
| 2020-09-01 11:10 | 21.6 |
| 2020-09-01 11:20 | 22.1 |
| 2020-09-01 11:30 | 23.1 |
| 2020-09-01 11:40 | 22.9 |
| 2020-09-01 11:50 | 23.1 |
| 2020-09-01 12:00 | 23.1 |
| 2020-09-01 12:10 | 23.5 |
| 2020-09-01 12:20 | 24.1 |
| 2020-09-01 12:30 | 23.8 |
| 2020-09-01 12:40 | 23.8 |
| 2020-09-01 12:50 | 25.2 |
| 2020-09-01 13:00 | 24.1 |
| 2020-09-01 13:10 | 24.6 |
| 2020-09-01 13:20 | 24.8 |
| 2020-09-01 13:30 | 24.6 |
| 2020-09-01 13:40 | 24.1 |
| 2020-09-01 13:50 | 25.1 |
| 2020-09-01 14:00 | 25.9 |
| 2020-09-01 14:10 | 26.3 |
| 2020-09-01 14:20 | 25.8 |
| 2020-09-01 14:30 | 25.3 |
| 2020-09-01 14:40 | 26.7 |
| 2020-09-01 14:50 | 26.3 |
| 2020-09-01 15:00 | 25.7 |
| 2020-09-01 15:10 | 26.1 |
| 2020-09-01 15:20 | 26.8 |
| 2020-09-01 15:30 | 26.5 |
| 2020-09-01 15:40 | 25.7 |
| 2020-09-01 15:50 | 25.8 |
| 2020-09-01 16:00 | 25.2 |
| 2020-09-01 16:10 | 24.9 |

|            |      |
|------------|------|
| 2019/10/19 | 0    |
| 2019/10/20 | 2.4  |
| 2019/10/21 | 19.2 |
| 2019/10/22 | 0    |
| 2019/10/23 | 0    |
| 2019/10/24 | 0    |
| 2019/10/25 | 0    |
| 2019/10/26 | 0    |
| 2019/10/27 | 12.7 |
| 2019/10/28 | 8.2  |
| 2019/10/29 | 0    |
| 2019/10/30 | 0    |
| 2019/10/31 | 31.9 |
| 2019/11/1  | 0    |
| 2019/11/2  | 0    |
| 2019/11/3  | 0    |
| 2019/11/4  | 1    |
| 2019/11/5  | 31.2 |
| 2019/11/6  | 0    |
| 2019/11/7  | 13.4 |
| 2019/11/8  | 0    |
| 2019/11/9  | 0.3  |
| 2019/11/10 | 0    |
| 2019/11/11 | 0    |
| 2019/11/12 | 0    |
| 2019/11/13 | 1.7  |
| 2019/11/14 | 7.2  |
| 2019/11/15 | 0    |
| 2019/11/16 | 0    |
| 2019/11/17 | 0    |
| 2019/11/18 | 0    |
| 2019/11/19 | 0    |
| 2019/11/20 | 0    |
| 2019/11/21 | 0    |
| 2019/11/22 | 0    |
| 2019/11/23 | 0    |
| 2019/11/24 | 0    |
| 2019/11/25 | 0    |
| 2019/11/26 | 42.5 |
| 2019/11/27 | 1.7  |
| 2019/11/28 | 0    |
| 2019/11/29 | 0    |
| 2019/11/30 | 0    |

|            |
|------------|
| 2020/10/19 |
| 2020/10/20 |
| 2020/10/21 |
| 2020/10/22 |
| 2020/10/23 |
| 2020/10/24 |
| 2020/10/25 |
| 2020/10/26 |
| 2020/10/27 |
| 2020/10/28 |
| 2020/10/29 |
| 2020/10/30 |
| 2020/10/31 |
| 2020/11/1  |
| 2020/11/2  |
| 2020/11/3  |
| 2020/11/4  |
| 2020/11/5  |
| 2020/11/6  |
| 2020/11/7  |
| 2020/11/8  |
| 2020/11/9  |
| 2020/11/10 |
| 2020/11/11 |
| 2020/11/12 |
| 2020/11/13 |
| 2020/11/14 |
| 2020/11/15 |
| 2020/11/16 |
| 2020/11/17 |
| 2020/11/18 |
| 2020/11/19 |
| 2020/11/20 |
| 2020/11/21 |
| 2020/11/22 |
| 2020/11/23 |
| 2020/11/24 |
| 2020/11/25 |
| 2020/11/26 |
| 2020/11/27 |
| 2020/11/28 |
| 2020/11/29 |
| 2020/11/30 |



|                  |      |
|------------------|------|
| 2020-09-01 16:20 | 25.1 |
| 2020-09-01 16:30 | 24.4 |
| 2020-09-01 16:40 | 23.8 |
| 2020-09-01 16:50 | 23.6 |
| 2020-09-01 17:00 | 23.1 |
| 2020-09-01 17:10 | 22.9 |
| 2020-09-01 17:20 | 21.9 |
| 2020-09-01 17:30 | 21.7 |
| 2020-09-01 17:40 | 21.1 |
| 2020-09-01 17:50 | 20.7 |
| 2020-09-01 18:00 | 20.3 |
| 2020-09-01 18:10 | 19.8 |
| 2020-09-01 18:20 | 19.4 |
| 2020-09-01 18:30 | 19.1 |
| 2020-09-01 18:40 | 18.8 |
| 2020-09-01 18:50 | 18.6 |
| 2020-09-01 19:00 | 18.3 |
| 2020-09-01 19:10 | 18.1 |
| 2020-09-01 19:20 | 17.9 |
| 2020-09-01 19:30 | 17.9 |
| 2020-09-01 19:40 | 17.8 |
| 2020-09-01 19:50 | 17.6 |
| 2020-09-01 20:00 | 17.6 |
| 2020-09-01 20:10 | 17.4 |
| 2020-09-01 20:20 | 17.3 |
| 2020-09-01 20:30 | 17.3 |
| 2020-09-01 20:40 | 17.2 |
| 2020-09-01 20:50 | 17   |
| 2020-09-01 21:00 | 16.9 |
| 2020-09-01 21:10 | 16.7 |
| 2020-09-01 21:20 | 16.6 |
| 2020-09-01 21:30 | 16.5 |
| 2020-09-01 21:40 | 16.4 |
| 2020-09-01 21:50 | 16.3 |
| 2020-09-01 22:00 | 16.1 |
| 2020-09-01 22:10 | 15.9 |
| 2020-09-01 22:20 | 15.8 |
| 2020-09-01 22:30 | 15.6 |
| 2020-09-01 22:30 | 15.6 |
| 2020-09-01 22:40 | 15.5 |
| 2020-09-01 22:50 | 15.4 |
| 2020-09-01 23:00 | 15.3 |
| 2020-09-01 23:10 | 15.2 |
| 2020-09-01 23:20 | 15.1 |
| 2020-09-01 23:30 | 15   |
| 2020-09-01 23:40 | 15.1 |
| 2020-09-01 23:50 | 15.1 |
| 2020-09-02 00:00 | 15.1 |
| 2020-09-02 00:10 | 15.1 |
| 2020-09-02 00:20 | 15.1 |



|                  |      |
|------------------|------|
| 2020-09-02 00:30 | 15.1 |
| 2020-09-02 00:40 | 15.1 |
| 2020-09-02 00:50 | 15   |
| 2020-09-02 01:00 | 15   |
| 2020-09-02 01:10 | 14.9 |
| 2020-09-02 01:20 | 14.9 |
| 2020-09-02 01:30 | 14.9 |
| 2020-09-02 01:40 | 14.9 |
| 2020-09-02 01:50 | 14.8 |
| 2020-09-02 02:00 | 14.8 |
| 2020-09-02 02:10 | 14.9 |
| 2020-09-02 02:20 | 14.9 |
| 2020-09-02 02:30 | 14.8 |
| 2020-09-02 02:40 | 14.8 |
| 2020-09-02 02:50 | 14.8 |
| 2020-09-02 03:00 | 14.8 |
| 2020-09-02 03:10 | 14.7 |
| 2020-09-02 03:20 | 14.6 |
| 2020-09-02 03:30 | 14.5 |
| 2020-09-02 03:40 | 14.5 |
| 2020-09-02 03:50 | 14.4 |
| 2020-09-02 04:00 | 14.4 |
| 2020-09-02 04:10 | 14.3 |
| 2020-09-02 04:20 | 14.3 |
| 2020-09-02 04:30 | 14.2 |
| 2020-09-02 04:40 | 14.1 |
| 2020-09-02 04:50 | 14.1 |
| 2020-09-02 05:00 | 14.1 |
| 2020-09-02 05:10 | 14.1 |
| 2020-09-02 05:20 | 14.1 |
| 2020-09-02 05:30 | 14.1 |
| 2020-09-02 05:40 | 14.1 |
| 2020-09-02 05:50 | 14.1 |
| 2020-09-02 06:00 | 14.1 |
| 2020-09-02 06:10 | 14.1 |
| 2020-09-02 06:20 | 14.1 |
| 2020-09-02 06:30 | 14.1 |
| 2020-09-02 06:40 | 14.1 |
| 2020-09-02 06:50 | 14.3 |
| 2020-09-02 07:00 | 14.3 |
| 2020-09-02 07:10 | 14.4 |
| 2020-09-02 07:20 | 14.7 |
| 2020-09-02 07:30 | 14.9 |
| 2020-09-02 07:40 | 15.4 |
| 2020-09-02 07:50 | 15.8 |
| 2020-09-02 08:00 | 16.1 |
| 2020-09-02 08:10 | 16.6 |
| 2020-09-02 08:20 | 16.9 |
| 2020-09-02 08:30 | 17.2 |
| 2020-09-02 08:40 | 17.6 |



|                  |      |
|------------------|------|
| 2020-09-02 08:50 | 17.9 |
| 2020-09-02 09:00 | 18.6 |
| 2020-09-02 09:10 | 18.6 |
| 2020-09-02 09:20 | 19.3 |
| 2020-09-02 09:30 | 19.6 |
| 2020-09-02 09:40 | 19.8 |
| 2020-09-02 09:50 | 20.4 |
| 2020-09-02 10:00 | 20.8 |
| 2020-09-02 10:10 | 21.7 |
| 2020-09-02 10:20 | 21.4 |
| 2020-09-02 10:30 | 21.9 |
| 2020-09-02 10:40 | 22.1 |
| 2020-09-02 10:50 | 22.6 |
| 2020-09-02 11:00 | 22.8 |
| 2020-09-02 11:10 | 22.8 |
| 2020-09-02 11:20 | 23.3 |
| 2020-09-02 11:30 | 23.6 |
| 2020-09-02 11:40 | 23.8 |
| 2020-09-02 11:50 | 24.3 |
| 2020-09-02 12:00 | 24.9 |
| 2020-09-02 12:10 | 25.3 |
| 2020-09-02 12:20 | 25.8 |
| 2020-09-02 12:30 | 25.6 |
| 2020-09-02 12:40 | 25.8 |
| 2020-09-02 12:50 | 25.8 |
| 2020-09-02 13:00 | 26.5 |
| 2020-09-02 13:10 | 27.6 |
| 2020-09-02 13:20 | 27.6 |
| 2020-09-02 13:30 | 27.2 |
| 2020-09-02 13:40 | 27.7 |
| 2020-09-02 13:50 | 28.1 |
| 2020-09-02 14:00 | 28.3 |
| 2020-09-02 14:10 | 28.6 |
| 2020-09-02 14:20 | 28.8 |
| 2020-09-02 14:30 | 27.8 |
| 2020-09-02 14:40 | 29.4 |
| 2020-09-02 14:50 | 29.6 |
| 2020-09-02 15:00 | 29.5 |
| 2020-09-02 15:10 | 29   |
| 2020-09-02 15:20 | 28.5 |
| 2020-09-02 15:30 | 28.9 |
| 2020-09-02 15:40 | 29.8 |
| 2020-09-02 15:50 | 29.1 |
| 2020-09-02 16:00 | 29.7 |
| 2020-09-02 16:10 | 29.6 |
| 2020-09-02 16:20 | 28.5 |
| 2020-09-02 16:30 | 28.8 |
| 2020-09-02 16:40 | 27.1 |
| 2020-09-02 16:50 | 27.3 |
| 2020-09-02 17:00 | 28.1 |



|                  |      |
|------------------|------|
| 2020-09-02 17:10 | 26.3 |
| 2020-09-02 17:20 | 26.8 |
| 2020-09-02 17:30 | 27.4 |
| 2020-09-02 17:40 | 26.2 |
| 2020-09-02 17:50 | 25.6 |
| 2020-09-02 18:00 | 25.1 |
| 2020-09-02 18:10 | 24.1 |
| 2020-09-02 18:20 | 23.3 |
| 2020-09-02 18:30 | 22.8 |
| 2020-09-02 18:40 | 22.4 |
| 2020-09-02 18:50 | 22.1 |
| 2020-09-02 19:00 | 21.8 |
| 2020-09-02 19:10 | 21.5 |
| 2020-09-02 19:20 | 21.2 |
| 2020-09-02 19:30 | 20.9 |
| 2020-09-02 19:40 | 20.7 |
| 2020-09-02 19:50 | 20.6 |
| 2020-09-02 20:00 | 20.3 |
| 2020-09-02 20:10 | 20.1 |
| 2020-09-02 20:20 | 19.8 |
| 2020-09-02 20:30 | 20   |
| 2020-09-02 20:40 | 20.4 |
| 2020-09-02 20:50 | 20.4 |
| 2020-09-02 21:00 | 20.5 |
| 2020-09-02 21:10 | 20.5 |
| 2020-09-02 21:20 | 20.2 |
| 2020-09-02 21:30 | 19.9 |
| 2020-09-02 21:40 | 19.6 |
| 2020-09-02 21:50 | 19.4 |
| 2020-09-02 22:00 | 19.4 |
| 2020-09-02 22:10 | 19.6 |
| 2020-09-02 22:20 | 19.6 |
| 2020-09-02 22:30 | 19.4 |
| 2020-09-02 22:40 | 19.4 |
| 2020-09-02 22:50 | 19.4 |
| 2020-09-02 23:00 | 19.4 |
| 2020-09-02 23:10 | 19.3 |
| 2020-09-02 23:20 | 19.1 |
| 2020-09-02 23:30 | 18.9 |
| 2020-09-02 23:40 | 18.9 |
| 2020-09-02 23:50 | 18.8 |
| 2020-09-03 00:00 | 18.6 |
| 2020-09-03 00:10 | 18.6 |
| 2020-09-03 00:20 | 18.6 |
| 2020-09-03 00:30 | 18.4 |
| 2020-09-03 00:40 | 18.4 |
| 2020-09-03 00:50 | 18.2 |
| 2020-09-03 01:00 | 18.3 |
| 2020-09-03 01:10 | 18.1 |
| 2020-09-03 01:20 | 17.9 |



|                  |      |
|------------------|------|
| 2020-09-03 01:30 | 17.8 |
| 2020-09-03 01:40 | 17.6 |
| 2020-09-03 01:50 | 17.4 |
| 2020-09-03 02:00 | 17.2 |
| 2020-09-03 02:10 | 17.2 |
| 2020-09-03 02:20 | 17.1 |
| 2020-09-03 02:30 | 17.1 |
| 2020-09-03 02:40 | 16.9 |
| 2020-09-03 02:50 | 16.9 |
| 2020-09-03 03:00 | 16.9 |
| 2020-09-03 03:10 | 16.9 |
| 2020-09-03 03:20 | 16.8 |
| 2020-09-03 03:30 | 16.7 |
| 2020-09-03 03:40 | 16.6 |
| 2020-09-03 03:50 | 16.6 |
| 2020-09-03 04:00 | 16.6 |
| 2020-09-03 04:10 | 16.6 |
| 2020-09-03 04:20 | 16.6 |
| 2020-09-03 04:30 | 16.6 |
| 2020-09-03 04:40 | 16.4 |
| 2020-09-03 04:50 | 16.4 |
| 2020-09-03 05:00 | 16.4 |
| 2020-09-03 05:10 | 16.3 |
| 2020-09-03 05:20 | 16.3 |
| 2020-09-03 05:30 | 16.2 |
| 2020-09-03 05:40 | 16.3 |
| 2020-09-03 05:50 | 16.1 |
| 2020-09-03 06:00 | 15.9 |
| 2020-09-03 06:10 | 15.9 |
| 2020-09-03 06:20 | 15.9 |
| 2020-09-03 06:30 | 15.9 |
| 2020-09-03 06:40 | 15.9 |
| 2020-09-03 06:50 | 15.8 |
| 2020-09-03 07:00 | 15.8 |
| 2020-09-03 07:10 | 15.9 |
| 2020-09-03 07:20 | 15.9 |
| 2020-09-03 07:30 | 15.8 |
| 2020-09-03 07:40 | 15.8 |
| 2020-09-03 07:50 | 15.8 |
| 2020-09-03 08:00 | 16.1 |
| 2020-09-03 08:10 | 16.4 |
| 2020-09-03 08:20 | 16.8 |
| 2020-09-03 08:30 | 16.3 |
| 2020-09-03 08:40 | 16.5 |
| 2020-09-03 08:50 | 15.9 |
| 2020-09-03 09:00 | 15.8 |
| 2020-09-03 09:10 | 15.4 |
| 2020-09-03 09:20 | 15.3 |
| 2020-09-03 09:30 | 15.3 |
| 2020-09-03 09:40 | 15.3 |



|                  |      |
|------------------|------|
| 2020-09-03 09:50 | 15.8 |
| 2020-09-03 10:00 | 16.9 |
| 2020-09-03 10:10 | 17.1 |
| 2020-09-03 10:20 | 17.3 |
| 2020-09-03 10:30 | 17.1 |
| 2020-09-03 10:40 | 16.9 |
| 2020-09-03 10:50 | 17.5 |
| 2020-09-03 11:00 | 19   |
| 2020-09-03 11:10 | 19.1 |
| 2020-09-03 11:20 | 18.9 |
| 2020-09-03 11:30 | 20.8 |
| 2020-09-03 11:40 | 21.1 |
| 2020-09-03 11:50 | 21   |
| 2020-09-03 12:00 | 22.7 |
| 2020-09-03 12:10 | 23   |
| 2020-09-03 12:20 | 23.5 |
| 2020-09-03 12:20 | 23.9 |
| 2020-09-03 12:30 | 22.3 |
| 2020-09-03 12:40 | 22.9 |
| 2020-09-03 12:50 | 21.8 |
| 2020-09-03 13:00 | 22.9 |
| 2020-09-03 13:10 | 25.1 |
| 2020-09-03 13:20 | 25.3 |
| 2020-09-03 13:30 | 24.4 |
| 2020-09-03 13:40 | 25.2 |
| 2020-09-03 13:50 | 23.6 |
| 2020-09-03 14:00 | 23.3 |
| 2020-09-03 14:10 | 23.4 |
| 2020-09-03 14:20 | 23.9 |
| 2020-09-03 14:30 | 23.4 |
| 2020-09-03 14:40 | 23.4 |
| 2020-09-03 14:50 | 23.3 |
| 2020-09-03 15:00 | 22.9 |
| 2020-09-03 15:10 | 22.8 |
| 2020-09-03 15:20 | 22.6 |
| 2020-09-03 15:30 | 22.6 |
| 2020-09-03 15:40 | 21.6 |
| 2020-09-03 15:50 | 21.1 |
| 2020-09-03 16:00 | 20.8 |
| 2020-09-03 16:10 | 20.4 |
| 2020-09-03 16:20 | 20.4 |
| 2020-09-03 16:30 | 20.4 |
| 2020-09-03 16:40 | 20.9 |
| 2020-09-03 16:50 | 20.5 |
| 2020-09-03 17:00 | 20.3 |
| 2020-09-03 17:10 | 20.3 |
| 2020-09-03 17:20 | 19.9 |
| 2020-09-03 17:30 | 20   |
| 2020-09-03 17:40 | 19.6 |
| 2020-09-03 17:50 | 19.3 |



|                  |      |
|------------------|------|
| 2020-09-03 18:00 | 19   |
| 2020-09-03 18:10 | 18.4 |
| 2020-09-03 18:20 | 18.1 |
| 2020-09-03 18:30 | 17.9 |
| 2020-09-03 18:40 | 17.7 |
| 2020-09-03 18:50 | 17.5 |
| 2020-09-03 19:00 | 17.3 |
| 2020-09-03 19:10 | 17.1 |
| 2020-09-03 19:20 | 17   |
| 2020-09-03 19:30 | 16.9 |
| 2020-09-03 19:40 | 16.9 |
| 2020-09-03 19:50 | 16.9 |
| 2020-09-03 20:00 | 16.8 |
| 2020-09-03 20:10 | 16.4 |
| 2020-09-03 20:20 | 16.1 |
| 2020-09-03 20:30 | 15.9 |
| 2020-09-03 20:40 | 15.9 |
| 2020-09-03 20:50 | 15.7 |
| 2020-09-03 21:00 | 15.6 |
| 2020-09-03 21:10 | 15.4 |
| 2020-09-03 21:20 | 15.3 |
| 2020-09-03 21:30 | 15   |
| 2020-09-03 21:40 | 14.8 |
| 2020-09-03 21:50 | 14.8 |
| 2020-09-03 22:00 | 14.7 |
| 2020-09-03 22:10 | 14.5 |
| 2020-09-03 22:20 | 14.6 |
| 2020-09-03 22:30 | 14.8 |
| 2020-09-03 22:40 | 14.8 |
| 2020-09-03 22:50 | 14.8 |
| 2020-09-03 23:00 | 14.8 |
| 2020-09-03 23:10 | 14.8 |
| 2020-09-03 23:20 | 14.7 |
| 2020-09-03 23:30 | 14.4 |
| 2020-09-03 23:40 | 14.4 |
| 2020-09-04 00:00 | 14.4 |
| 2020-09-04 00:10 | 14.3 |
| 2020-09-04 00:20 | 14.1 |
| 2020-09-04 00:30 | 13.9 |
| 2020-09-04 00:40 | 13.8 |
| 2020-09-04 00:50 | 13.8 |
| 2020-09-04 01:00 | 13.4 |
| 2020-09-04 01:10 | 13.3 |
| 2020-09-04 01:20 | 13.1 |
| 2020-09-04 01:30 | 13.1 |
| 2020-09-04 01:40 | 13.1 |
| 2020-09-04 01:50 | 13.1 |
| 2020-09-04 02:00 | 13.1 |
| 2020-09-04 02:10 | 13.1 |
| 2020-09-04 02:20 | 13.2 |



|                  |      |
|------------------|------|
| 2020-09-04 02:30 | 13.2 |
| 2020-09-04 02:40 | 13.3 |
| 2020-09-04 02:50 | 13.4 |
| 2020-09-04 03:00 | 13.6 |
| 2020-09-04 03:10 | 13.6 |
| 2020-09-04 03:20 | 13.4 |
| 2020-09-04 03:30 | 13.1 |
| 2020-09-04 03:40 | 12.9 |
| 2020-09-04 03:50 | 12.8 |
| 2020-09-04 04:00 | 12.5 |
| 2020-09-04 04:10 | 12.3 |
| 2020-09-04 04:20 | 12.1 |
| 2020-09-04 04:30 | 12   |
| 2020-09-04 04:40 | 11.8 |
| 2020-09-04 04:50 | 11.4 |
| 2020-09-04 05:00 | 11.3 |
| 2020-09-04 05:10 | 11.2 |
| 2020-09-04 05:20 | 11.1 |
| 2020-09-04 05:30 | 10.9 |
| 2020-09-04 05:40 | 10.9 |
| 2020-09-04 05:50 | 10.9 |
| 2020-09-04 06:00 | 10.8 |
| 2020-09-04 06:10 | 10.6 |
| 2020-09-04 06:20 | 10.3 |
| 2020-09-04 06:30 | 10.2 |
| 2020-09-04 06:40 | 9.9  |
| 2020-09-04 06:50 | 10.3 |
| 2020-09-04 07:00 | 10.4 |
| 2020-09-04 07:10 | 10.3 |
| 2020-09-04 07:20 | 10.3 |
| 2020-09-04 07:30 | 10.8 |
| 2020-09-04 07:40 | 12.1 |
| 2020-09-04 07:50 | 13.4 |
| 2020-09-04 08:00 | 14.6 |
| 2020-09-04 08:10 | 15.1 |
| 2020-09-04 08:20 | 15.6 |
| 2020-09-04 08:30 | 16.1 |
| 2020-09-04 08:40 | 16.4 |
| 2020-09-04 08:50 | 16.3 |
| 2020-09-04 09:00 | 17.2 |
| 2020-09-04 09:10 | 17.9 |
| 2020-09-04 09:20 | 18.5 |
| 2020-09-04 09:30 | 18.8 |
| 2020-09-04 09:40 | 19.4 |
| 2020-09-04 09:50 | 19.6 |
| 2020-09-04 10:00 | 20.4 |
| 2020-09-04 10:10 | 21.7 |
| 2020-09-04 10:20 | 21.3 |
| 2020-09-04 10:30 | 20.5 |
| 2020-09-04 10:40 | 21.1 |



|                  |      |
|------------------|------|
| 2020-09-04 10:50 | 22.2 |
| 2020-09-04 11:00 | 22.9 |
| 2020-09-04 11:10 | 24.3 |
| 2020-09-04 11:20 | 24.2 |
| 2020-09-04 11:30 | 25.3 |
| 2020-09-04 11:40 | 24.2 |
| 2020-09-04 11:50 | 23.8 |
| 2020-09-04 12:00 | 25.8 |
| 2020-09-04 12:10 | 25.8 |
| 2020-09-04 12:20 | 25.3 |
| 2020-09-04 12:30 | 24.6 |
| 2020-09-04 12:40 | 25.6 |
| 2020-09-04 12:50 | 26.3 |
| 2020-09-04 13:00 | 27.6 |
| 2020-09-04 13:10 | 26.3 |
| 2020-09-04 13:20 | 27.4 |
| 2020-09-04 13:30 | 27.3 |
| 2020-09-04 13:40 | 27.3 |
| 2020-09-04 13:50 | 28.1 |
| 2020-09-04 14:00 | 27.1 |
| 2020-09-04 14:10 | 28.1 |
| 2020-09-04 14:20 | 28   |
| 2020-09-04 14:30 | 28.1 |
| 2020-09-04 14:40 | 28.1 |
| 2020-09-04 14:50 | 28.9 |
| 2020-09-04 15:00 | 29.2 |
| 2020-09-04 15:10 | 28.2 |
| 2020-09-04 15:20 | 28.6 |
| 2020-09-04 15:30 | 28.1 |
| 2020-09-04 15:40 | 27.6 |
| 2020-09-04 15:50 | 27.8 |
| 2020-09-04 16:00 | 27.4 |
| 2020-09-04 16:10 | 26.8 |
| 2020-09-04 16:20 | 27.4 |
| 2020-09-04 16:30 | 26.8 |
| 2020-09-04 16:40 | 26.4 |
| 2020-09-04 16:50 | 26.9 |
| 2020-09-04 17:00 | 25.9 |
| 2020-09-04 17:10 | 26.3 |
| 2020-09-04 17:20 | 26.2 |
| 2020-09-04 17:30 | 26.2 |
| 2020-09-04 17:40 | 24.9 |
| 2020-09-04 17:50 | 23.4 |
| 2020-09-04 18:00 | 22.5 |
| 2020-09-04 18:10 | 22   |
| 2020-09-04 18:20 | 21.4 |
| 2020-09-04 18:30 | 21.1 |
| 2020-09-04 18:40 | 20.7 |
| 2020-09-04 18:50 | 20.4 |
| 2020-09-04 19:00 | 20.1 |



|                  |      |
|------------------|------|
| 2020-09-04 19:10 | 20.1 |
| 2020-09-04 19:20 | 19.9 |
| 2020-09-04 19:30 | 19.6 |
| 2020-09-04 19:40 | 19.3 |
| 2020-09-04 19:50 | 19.3 |
| 2020-09-04 20:00 | 19.2 |
| 2020-09-04 20:10 | 19.3 |
| 2020-09-04 20:20 | 19.3 |
| 2020-09-04 20:30 | 19.3 |
| 2020-09-04 20:40 | 18.9 |
| 2020-09-04 20:50 | 18.1 |
| 2020-09-04 21:00 | 17.4 |
| 2020-09-04 21:10 | 17.2 |
| 2020-09-04 21:20 | 16.9 |
| 2020-09-04 21:30 | 16.6 |
| 2020-09-04 21:40 | 16.6 |
| 2020-09-04 21:50 | 16.6 |
| 2020-09-04 22:00 | 16.7 |
| 2020-09-04 22:10 | 16.8 |
| 2020-09-04 22:20 | 16.7 |
| 2020-09-04 22:30 | 16.7 |
| 2020-09-04 22:40 | 16.6 |
| 2020-09-04 22:50 | 16.5 |
| 2020-09-04 23:00 | 16.4 |
| 2020-09-04 23:10 | 16.3 |
| 2020-09-04 23:20 | 16.3 |
| 2020-09-04 23:30 | 16.3 |
| 2020-09-04 23:40 | 16.3 |
| 2020-09-04 23:50 | 16.3 |
| 2020-09-05 00:00 | 16.2 |
| 2020-09-05 00:10 | 16.1 |
| 2020-09-05 00:20 | 16.1 |
| 2020-09-05 00:30 | 16.1 |
| 2020-09-05 00:40 | 16   |
| 2020-09-05 00:50 | 16   |
| 2020-09-05 01:00 | 15.9 |
| 2020-09-05 01:10 | 15.7 |
| 2020-09-05 01:20 | 15.6 |
| 2020-09-05 01:30 | 15.6 |
| 2020-09-05 01:40 | 15.4 |
| 2020-09-05 01:50 | 15.3 |
| 2020-09-05 02:00 | 15.1 |
| 2020-09-05 02:10 | 15.1 |
| 2020-09-05 02:20 | 15.1 |
| 2020-09-05 02:30 | 15.1 |
| 2020-09-05 02:40 | 15.1 |
| 2020-09-05 02:40 | 15.1 |
| 2020-09-05 02:50 | 15.1 |
| 2020-09-05 02:50 | 15.1 |
| 2020-09-05 03:00 | 15.1 |



|                  |      |
|------------------|------|
| 2020-09-05 03:10 | 15.1 |
| 2020-09-05 03:20 | 15.2 |
| 2020-09-05 03:30 | 15.2 |
| 2020-09-05 03:40 | 15.2 |
| 2020-09-05 03:50 | 15.3 |
| 2020-09-05 04:00 | 15.3 |
| 2020-09-05 04:10 | 15.3 |
| 2020-09-05 04:20 | 15.4 |
| 2020-09-05 04:30 | 15.6 |
| 2020-09-05 04:40 | 15.9 |
| 2020-09-05 04:50 | 16.1 |
| 2020-09-05 05:00 | 16.1 |
| 2020-09-05 05:10 | 16.2 |
| 2020-09-05 05:20 | 16.3 |
| 2020-09-05 05:30 | 16.4 |
| 2020-09-05 05:40 | 16.3 |
| 2020-09-05 05:50 | 16.4 |
| 2020-09-05 06:00 | 16.3 |
| 2020-09-05 06:10 | 16   |
| 2020-09-05 06:20 | 15.8 |
| 2020-09-05 06:30 | 15.5 |
| 2020-09-05 06:40 | 15.3 |
| 2020-09-05 06:50 | 15.1 |
| 2020-09-05 07:00 | 14.6 |
| 2020-09-05 07:10 | 15.1 |
| 2020-09-05 07:20 | 15.8 |
| 2020-09-05 07:30 | 16.3 |
| 2020-09-05 07:40 | 16.7 |
| 2020-09-05 07:50 | 18.7 |
| 2020-09-05 08:00 | 19.6 |
| 2020-09-05 08:10 | 20   |
| 2020-09-05 08:20 | 20.3 |
| 2020-09-05 08:30 | 20.9 |
| 2020-09-05 08:40 | 21.6 |
| 2020-09-05 08:50 | 22.1 |
| 2020-09-05 09:00 | 21.9 |
| 2020-09-05 09:10 | 23.2 |
| 2020-09-05 09:20 | 23.6 |
| 2020-09-05 09:30 | 24.4 |
| 2020-09-05 09:40 | 23.8 |
| 2020-09-05 09:50 | 23.1 |
| 2020-09-05 10:00 | 23.1 |
| 2020-09-05 10:10 | 23.4 |
| 2020-09-05 10:20 | 23.4 |
| 2020-09-05 10:30 | 24.4 |
| 2020-09-05 10:40 | 25.6 |
| 2020-09-05 10:50 | 27.3 |
| 2020-09-05 11:00 | 27.8 |
| 2020-09-05 11:10 | 28.1 |
| 2020-09-05 11:20 | 29.9 |



|                  |      |
|------------------|------|
| 2020-09-05 11:30 | 29   |
| 2020-09-05 11:40 | 28.6 |
| 2020-09-05 11:50 | 28.9 |
| 2020-09-05 12:00 | 29.8 |
| 2020-09-05 12:10 | 29.3 |
| 2020-09-05 12:20 | 29.8 |
| 2020-09-05 12:30 | 29.4 |
| 2020-09-05 12:40 | 29.1 |
| 2020-09-05 12:50 | 29.3 |
| 2020-09-05 13:00 | 30.9 |
| 2020-09-05 13:10 | 30.7 |
| 2020-09-05 13:20 | 30.7 |
| 2020-09-05 13:30 | 30.8 |
| 2020-09-05 13:40 | 31.3 |
| 2020-09-05 13:50 | 31.6 |
| 2020-09-05 14:00 | 32.2 |
| 2020-09-05 14:10 | 31.3 |
| 2020-09-05 14:20 | 31.6 |
| 2020-09-05 14:30 | 31.6 |
| 2020-09-05 14:40 | 31.9 |
| 2020-09-05 14:50 | 31.5 |
| 2020-09-05 15:00 | 30.4 |
| 2020-09-05 15:10 | 30.6 |
| 2020-09-05 15:20 | 30.4 |
| 2020-09-05 15:30 | 31.3 |
| 2020-09-05 15:40 | 31.3 |
| 2020-09-05 15:50 | 30.8 |
| 2020-09-05 16:00 | 29.9 |
| 2020-09-05 16:10 | 29.7 |
| 2020-09-05 16:20 | 29.6 |
| 2020-09-05 16:30 | 29.3 |
| 2020-09-05 16:40 | 29.3 |
| 2020-09-05 16:50 | 29.3 |
| 2020-09-05 17:00 | 29.2 |
| 2020-09-05 17:10 | 28.8 |
| 2020-09-05 17:20 | 28.6 |
| 2020-09-05 17:30 | 28.1 |
| 2020-09-05 17:40 | 27.9 |
| 2020-09-05 17:50 | 27.5 |
| 2020-09-05 18:00 | 27.4 |
| 2020-09-05 18:10 | 27.1 |
| 2020-09-05 18:20 | 26.8 |
| 2020-09-05 18:30 | 26.3 |
| 2020-09-05 18:40 | 25.7 |
| 2020-09-05 18:50 | 25.3 |
| 2020-09-05 19:00 | 24.9 |
| 2020-09-05 19:10 | 24.5 |
| 2020-09-05 19:20 | 23.9 |
| 2020-09-05 19:30 | 23.4 |
| 2020-09-05 19:40 | 23.1 |



|                  |      |
|------------------|------|
| 2020-09-05 19:50 | 22.9 |
| 2020-09-05 20:00 | 22.8 |
| 2020-09-05 20:10 | 22.6 |
| 2020-09-05 20:20 | 22.2 |
| 2020-09-05 20:30 | 21.9 |
| 2020-09-05 20:40 | 21.9 |
| 2020-09-05 20:50 | 21.9 |
| 2020-09-05 21:00 | 21.6 |
| 2020-09-05 21:10 | 21.4 |
| 2020-09-05 21:20 | 21.1 |
| 2020-09-05 21:30 | 20.8 |
| 2020-09-05 21:40 | 20.7 |
| 2020-09-05 21:50 | 20.4 |
| 2020-09-05 22:00 | 20.3 |
| 2020-09-05 22:10 | 20.1 |
| 2020-09-05 22:20 | 19.9 |
| 2020-09-05 22:30 | 19.8 |
| 2020-09-05 22:40 | 19.6 |
| 2020-09-05 22:50 | 19.4 |
| 2020-09-05 23:00 | 19.4 |
| 2020-09-05 23:10 | 19.3 |
| 2020-09-05 23:20 | 19.2 |
| 2020-09-05 23:30 | 19.1 |
| 2020-09-05 23:40 | 19.1 |
| 2020-09-05 23:50 | 18.9 |
| 2020-09-06 00:00 | 18.9 |
| 2020-09-06 00:10 | 18.8 |
| 2020-09-06 00:20 | 18.8 |
| 2020-09-06 00:30 | 18.8 |
| 2020-09-06 00:40 | 18.7 |
| 2020-09-06 00:50 | 18.5 |
| 2020-09-06 01:00 | 18.3 |
| 2020-09-06 01:10 | 18.1 |
| 2020-09-06 01:20 | 18.1 |
| 2020-09-06 01:30 | 18.1 |
| 2020-09-06 01:40 | 17.9 |
| 2020-09-06 01:50 | 17.9 |
| 2020-09-06 02:00 | 18.1 |
| 2020-09-06 02:10 | 18.4 |
| 2020-09-06 02:20 | 18.4 |
| 2020-09-06 02:30 | 18.2 |
| 2020-09-06 02:40 | 18.3 |
| 2020-09-06 02:50 | 18.1 |
| 2020-09-06 03:00 | 18   |
| 2020-09-06 03:10 | 18   |
| 2020-09-06 03:20 | 17.9 |
| 2020-09-06 03:30 | 17.7 |
| 2020-09-06 03:40 | 17.5 |
| 2020-09-06 03:50 | 17.4 |
| 2020-09-06 04:00 | 17.3 |



|                  |      |
|------------------|------|
| 2020-09-06 04:10 | 17.3 |
| 2020-09-06 04:20 | 17.4 |
| 2020-09-06 04:30 | 17.4 |
| 2020-09-06 04:40 | 17.3 |
| 2020-09-06 04:50 | 17.3 |
| 2020-09-06 05:00 | 17.5 |
| 2020-09-06 05:10 | 17.8 |
| 2020-09-06 05:20 | 18   |
| 2020-09-06 05:30 | 18.9 |
| 2020-09-06 05:40 | 19.8 |
| 2020-09-06 05:50 | 20.4 |
| 2020-09-06 06:00 | 20.6 |
| 2020-09-06 06:10 | 20.6 |
| 2020-09-06 06:20 | 20.8 |
| 2020-09-06 06:30 | 20.8 |
| 2020-09-06 06:40 | 21   |
| 2020-09-06 06:50 | 20.4 |
| 2020-09-06 07:00 | 19.4 |
| 2020-09-06 07:10 | 19.4 |
| 2020-09-06 07:20 | 18.1 |
| 2020-09-06 07:30 | 17.6 |
| 2020-09-06 07:40 | 17.1 |
| 2020-09-06 07:50 | 15.9 |
| 2020-09-06 08:00 | 14.8 |
| 2020-09-06 08:10 | 14.2 |
| 2020-09-06 08:20 | 13.8 |
| 2020-09-06 08:30 | 14   |
| 2020-09-06 08:40 | 13.9 |
| 2020-09-06 08:50 | 14.1 |
| 2020-09-06 09:00 | 14.5 |
| 2020-09-06 09:10 | 14.9 |
| 2020-09-06 09:20 | 15.4 |
| 2020-09-06 09:20 | 15.4 |
| 2020-09-06 09:30 | 16.6 |
| 2020-09-06 09:40 | 16.6 |
| 2020-09-06 09:50 | 16.8 |
| 2020-09-06 10:00 | 17.9 |
| 2020-09-06 10:10 | 17.7 |
| 2020-09-06 10:20 | 17.3 |
| 2020-09-06 10:30 | 17.1 |
| 2020-09-06 10:40 | 17   |
| 2020-09-06 10:50 | 17   |
| 2020-09-06 11:00 | 17.1 |
| 2020-09-06 11:10 | 17.3 |
| 2020-09-06 11:20 | 17.3 |
| 2020-09-06 11:30 | 17.4 |
| 2020-09-06 11:40 | 17.4 |
| 2020-09-06 11:50 | 17.3 |
| 2020-09-06 12:00 | 17.4 |
| 2020-09-06 12:10 | 17.6 |



|                  |      |
|------------------|------|
| 2020-09-06 12:20 | 18.1 |
| 2020-09-06 12:30 | 17.6 |
| 2020-09-06 12:40 | 17.3 |
| 2020-09-06 12:50 | 17   |
| 2020-09-06 13:00 | 17   |
| 2020-09-06 13:10 | 17.1 |
| 2020-09-06 13:20 | 16.9 |
| 2020-09-06 13:30 | 16.7 |
| 2020-09-06 13:40 | 16.6 |
| 2020-09-06 13:50 | 16.6 |
| 2020-09-06 14:00 | 17.2 |
| 2020-09-06 14:10 | 17.4 |
| 2020-09-06 14:20 | 17.4 |
| 2020-09-06 14:30 | 17.8 |
| 2020-09-06 14:40 | 17.3 |
| 2020-09-06 14:50 | 17.2 |
| 2020-09-06 15:00 | 17.1 |
| 2020-09-06 15:10 | 17   |
| 2020-09-06 15:20 | 16.8 |
| 2020-09-06 15:30 | 16.8 |
| 2020-09-06 15:40 | 16.9 |
| 2020-09-06 15:50 | 16.9 |
| 2020-09-06 16:00 | 16.9 |
| 2020-09-06 16:10 | 16.9 |
| 2020-09-06 16:20 | 16.8 |
| 2020-09-06 16:30 | 16.6 |
| 2020-09-06 16:40 | 16.6 |
| 2020-09-06 16:50 | 16.6 |
| 2020-09-06 17:00 | 16.4 |
| 2020-09-06 17:10 | 16.3 |
| 2020-09-06 17:20 | 16.1 |
| 2020-09-06 17:30 | 16.1 |
| 2020-09-06 17:40 | 16   |
| 2020-09-06 17:50 | 15.9 |
| 2020-09-06 18:00 | 15.8 |
| 2020-09-06 18:10 | 15.7 |
| 2020-09-06 18:20 | 15.6 |
| 2020-09-06 18:30 | 15.6 |
| 2020-09-06 18:40 | 15.5 |
| 2020-09-06 18:50 | 15.4 |
| 2020-09-06 19:00 | 15.4 |
| 2020-09-06 19:10 | 15.4 |
| 2020-09-06 19:20 | 15.1 |
| 2020-09-06 19:30 | 14.9 |
| 2020-09-06 19:40 | 14.8 |
| 2020-09-06 19:50 | 14.8 |
| 2020-09-06 20:00 | 14.7 |
| 2020-09-06 20:10 | 14.6 |
| 2020-09-06 20:20 | 14.7 |
| 2020-09-06 20:30 | 14.7 |



|                  |      |
|------------------|------|
| 2020-09-06 20:40 | 14.5 |
| 2020-09-06 20:50 | 14.5 |
| 2020-09-06 21:00 | 14.6 |
| 2020-09-06 21:10 | 14.6 |
| 2020-09-06 21:20 | 14.6 |
| 2020-09-06 21:30 | 14.6 |
| 2020-09-06 21:40 | 14.6 |
| 2020-09-06 21:50 | 14.6 |
| 2020-09-06 22:00 | 14.5 |
| 2020-09-06 22:10 | 14.4 |
| 2020-09-06 22:20 | 14.3 |
| 2020-09-06 22:30 | 14.3 |
| 2020-09-06 22:40 | 14.3 |
| 2020-09-06 22:50 | 14.3 |
| 2020-09-06 23:00 | 14.3 |
| 2020-09-06 23:10 | 14.2 |
| 2020-09-06 23:20 | 14.2 |
| 2020-09-06 23:30 | 14.2 |
| 2020-09-06 23:40 | 14.2 |
| 2020-09-06 23:50 | 14.1 |
| 2020-09-07 00:00 | 14.2 |
| 2020-09-07 00:10 | 14.1 |
| 2020-09-07 00:20 | 14.1 |
| 2020-09-07 00:30 | 14.1 |
| 2020-09-07 00:40 | 14   |
| 2020-09-07 00:50 | 14   |
| 2020-09-07 01:00 | 13.9 |
| 2020-09-07 01:10 | 13.9 |
| 2020-09-07 01:20 | 13.9 |
| 2020-09-07 01:30 | 13.8 |
| 2020-09-07 01:40 | 13.8 |
| 2020-09-07 01:50 | 13.7 |
| 2020-09-07 02:00 | 13.6 |
| 2020-09-07 02:10 | 13.6 |
| 2020-09-07 02:20 | 13.6 |
| 2020-09-07 02:30 | 13.6 |
| 2020-09-07 02:40 | 13.6 |
| 2020-09-07 02:50 | 13.6 |
| 2020-09-07 03:00 | 13.6 |
| 2020-09-07 03:10 | 13.5 |
| 2020-09-07 03:20 | 13.4 |
| 2020-09-07 03:30 | 13.5 |
| 2020-09-07 03:40 | 13.5 |
| 2020-09-07 03:50 | 13.5 |
| 2020-09-07 04:00 | 13.5 |
| 2020-09-07 04:10 | 13.4 |
| 2020-09-07 04:20 | 13.4 |
| 2020-09-07 04:30 | 13.4 |
| 2020-09-07 04:40 | 13.4 |
| 2020-09-07 04:50 | 13.4 |



|                  |      |
|------------------|------|
| 2020-09-07 05:00 | 13.4 |
| 2020-09-07 05:10 | 13.4 |
| 2020-09-07 05:20 | 13.4 |
| 2020-09-07 05:30 | 13.4 |
| 2020-09-07 05:40 | 13.3 |
| 2020-09-07 05:50 | 13.3 |
| 2020-09-07 06:00 | 13.2 |
| 2020-09-07 06:10 | 13.3 |
| 2020-09-07 06:20 | 13.3 |
| 2020-09-07 06:30 | 13.3 |
| 2020-09-07 06:40 | 13.3 |
| 2020-09-07 06:50 | 13.3 |
| 2020-09-07 07:00 | 13.3 |
| 2020-09-07 07:10 | 13.4 |
| 2020-09-07 07:20 | 13.4 |
| 2020-09-07 07:30 | 13.4 |
| 2020-09-07 07:40 | 13.6 |
| 2020-09-07 07:50 | 13.6 |
| 2020-09-07 08:00 | 13.7 |
| 2020-09-07 08:10 | 13.7 |
| 2020-09-07 08:10 | 13.8 |
| 2020-09-07 08:20 | 13.7 |
| 2020-09-07 08:30 | 13.7 |
| 2020-09-07 08:40 | 13.8 |
| 2020-09-07 08:50 | 13.8 |
| 2020-09-07 09:00 | 13.8 |
| 2020-09-07 09:10 | 13.9 |
| 2020-09-07 09:20 | 13.8 |
| 2020-09-07 09:30 | 13.8 |
| 2020-09-07 09:40 | 13.8 |
| 2020-09-07 09:50 | 13.9 |
| 2020-09-07 10:00 | 13.8 |
| 2020-09-07 10:10 | 13.8 |
| 2020-09-07 10:20 | 13.9 |
| 2020-09-07 10:30 | 13.9 |
| 2020-09-07 10:40 | 13.8 |
| 2020-09-07 10:50 | 13.8 |
| 2020-09-07 11:00 | 13.9 |
| 2020-09-07 11:10 | 13.9 |
| 2020-09-07 11:20 | 13.9 |
| 2020-09-07 11:30 | 14.1 |
| 2020-09-07 11:40 | 14.2 |
| 2020-09-07 11:50 | 14.2 |
| 2020-09-07 12:00 | 14.2 |
| 2020-09-07 12:10 | 14.3 |
| 2020-09-07 12:20 | 14.3 |
| 2020-09-07 12:30 | 14.3 |
| 2020-09-07 12:40 | 14.3 |
| 2020-09-07 12:50 | 14.4 |
| 2020-09-07 13:00 | 14.5 |



|                  |      |
|------------------|------|
| 2020-09-07 13:10 | 14.5 |
| 2020-09-07 13:20 | 14.4 |
| 2020-09-07 13:30 | 14.5 |
| 2020-09-07 13:40 | 14.6 |
| 2020-09-07 13:50 | 14.6 |
| 2020-09-07 14:00 | 14.6 |
| 2020-09-07 14:10 | 14.7 |
| 2020-09-07 14:20 | 14.8 |
| 2020-09-07 14:30 | 14.9 |
| 2020-09-07 14:40 | 15   |
| 2020-09-07 14:50 | 15.1 |
| 2020-09-07 15:00 | 15.1 |
| 2020-09-07 15:10 | 15.1 |
| 2020-09-07 15:20 | 15.1 |
| 2020-09-07 15:30 | 15.2 |
| 2020-09-07 15:30 | 15.2 |
| 2020-09-07 15:40 | 15.2 |
| 2020-09-07 15:50 | 15.2 |
| 2020-09-07 16:00 | 15.1 |
| 2020-09-07 16:10 | 15.1 |
| 2020-09-07 16:20 | 15.1 |
| 2020-09-07 16:30 | 15.1 |
| 2020-09-07 16:40 | 15.3 |
| 2020-09-07 16:50 | 15.3 |
| 2020-09-07 17:00 | 15.3 |
| 2020-09-07 17:10 | 15.4 |
| 2020-09-07 17:20 | 15.4 |
| 2020-09-07 17:30 | 15.4 |
| 2020-09-07 17:40 | 15.3 |
| 2020-09-07 17:50 | 15.3 |
| 2020-09-07 18:00 | 15.3 |
| 2020-09-07 18:10 | 15.3 |
| 2020-09-07 18:20 | 15.3 |
| 2020-09-07 18:30 | 15.3 |
| 2020-09-07 18:40 | 15.3 |
| 2020-09-07 18:50 | 15.3 |
| 2020-09-07 19:00 | 15.3 |
| 2020-09-07 19:10 | 15.3 |
| 2020-09-07 19:20 | 15.3 |
| 2020-09-07 19:30 | 15.3 |
| 2020-09-07 19:40 | 15.3 |
| 2020-09-07 19:50 | 15.3 |
| 2020-09-07 20:00 | 15.3 |
| 2020-09-07 20:10 | 15.3 |
| 2020-09-07 20:20 | 15.2 |
| 2020-09-07 20:30 | 15.1 |
| 2020-09-07 20:40 | 15.1 |
| 2020-09-07 20:50 | 15.1 |
| 2020-09-07 21:00 | 15.1 |
| 2020-09-07 21:10 | 15.1 |



|                  |      |
|------------------|------|
| 2020-09-07 21:20 | 15.1 |
| 2020-09-07 21:30 | 15.1 |
| 2020-09-07 21:40 | 15.1 |
| 2020-09-07 21:50 | 15.1 |
| 2020-09-07 22:00 | 15.1 |
| 2020-09-07 22:10 | 15.1 |
| 2020-09-07 22:20 | 15.2 |
| 2020-09-07 22:30 | 15.2 |
| 2020-09-07 22:40 | 15.3 |
| 2020-09-07 22:50 | 15.3 |
| 2020-09-07 23:00 | 15.3 |
| 2020-09-07 23:10 | 15.3 |
| 2020-09-07 23:20 | 15.3 |
| 2020-09-07 23:30 | 15.2 |
| 2020-09-07 23:40 | 15.1 |
| 2020-09-07 23:50 | 15.1 |
| 2020-09-08 00:00 | 15.1 |
| 2020-09-08 00:10 | 15.1 |
| 2020-09-08 00:20 | 15.1 |
| 2020-09-08 00:30 | 15.1 |
| 2020-09-08 00:40 | 15.1 |
| 2020-09-08 00:50 | 15.1 |
| 2020-09-08 01:00 | 15.1 |
| 2020-09-08 01:10 | 15.1 |
| 2020-09-08 01:20 | 15.1 |
| 2020-09-08 01:30 | 15.1 |
| 2020-09-08 01:40 | 15   |
| 2020-09-08 01:50 | 14.9 |
| 2020-09-08 02:00 | 14.7 |
| 2020-09-08 02:10 | 14.6 |
| 2020-09-08 02:20 | 14.4 |
| 2020-09-08 02:30 | 14.4 |
| 2020-09-08 02:40 | 14.4 |
| 2020-09-08 02:50 | 14.4 |
| 2020-09-08 03:00 | 14.3 |
| 2020-09-08 03:10 | 14.3 |
| 2020-09-08 03:20 | 14.3 |
| 2020-09-08 03:30 | 14.2 |
| 2020-09-08 03:40 | 14.1 |
| 2020-09-08 03:50 | 14   |
| 2020-09-08 04:00 | 13.9 |
| 2020-09-08 04:10 | 13.9 |
| 2020-09-08 04:20 | 13.9 |
| 2020-09-08 04:30 | 13.8 |
| 2020-09-08 04:40 | 13.8 |
| 2020-09-08 04:50 | 13.8 |
| 2020-09-08 05:00 | 13.8 |
| 2020-09-08 05:10 | 13.8 |
| 2020-09-08 05:20 | 13.8 |
| 2020-09-08 05:30 | 13.8 |



|                  |      |
|------------------|------|
| 2020-09-08 05:40 | 13.8 |
| 2020-09-08 05:50 | 13.8 |
| 2020-09-08 06:00 | 13.8 |
| 2020-09-08 06:10 | 13.9 |
| 2020-09-08 06:20 | 13.9 |
| 2020-09-08 06:30 | 13.8 |
| 2020-09-08 06:40 | 13.9 |
| 2020-09-08 06:50 | 13.9 |
| 2020-09-08 07:00 | 13.9 |
| 2020-09-08 07:10 | 13.9 |
| 2020-09-08 07:20 | 13.9 |
| 2020-09-08 07:30 | 14   |
| 2020-09-08 07:40 | 14.1 |
| 2020-09-08 07:50 | 14.2 |
| 2020-09-08 08:00 | 14.3 |
| 2020-09-08 08:10 | 14.5 |
| 2020-09-08 08:20 | 14.5 |
| 2020-09-08 08:30 | 14.7 |
| 2020-09-08 08:40 | 14.8 |
| 2020-09-08 08:50 | 14.9 |
| 2020-09-08 09:00 | 14.9 |
| 2020-09-08 09:10 | 15.2 |
| 2020-09-08 09:20 | 15.3 |
| 2020-09-08 09:30 | 15.4 |
| 2020-09-08 09:40 | 15.9 |
| 2020-09-08 09:50 | 15.9 |
| 2020-09-08 10:00 | 16.3 |
| 2020-09-08 10:10 | 16.9 |
| 2020-09-08 10:20 | 17.5 |
| 2020-09-08 10:30 | 18.1 |
| 2020-09-08 10:40 | 18.6 |
| 2020-09-08 10:50 | 18.8 |
| 2020-09-08 11:00 | 18.6 |
| 2020-09-08 11:10 | 18.8 |
| 2020-09-08 11:20 | 19.3 |
| 2020-09-08 11:30 | 19.1 |
| 2020-09-08 11:40 | 19.5 |
| 2020-09-08 11:50 | 19.8 |
| 2020-09-08 12:00 | 19.9 |
| 2020-09-08 12:10 | 20.3 |
| 2020-09-08 12:20 | 20   |
| 2020-09-08 12:30 | 19.8 |
| 2020-09-08 12:40 | 20.2 |
| 2020-09-08 12:50 | 20.4 |
| 2020-09-08 13:00 | 20.6 |
| 2020-09-08 13:10 | 20.8 |
| 2020-09-08 13:20 | 20.6 |
| 2020-09-08 13:30 | 20.4 |
| 2020-09-08 13:40 | 20.3 |
| 2020-09-08 13:50 | 20.1 |



|                  |      |
|------------------|------|
| 2020-09-08 14:00 | 20.3 |
| 2020-09-08 14:10 | 20.1 |
| 2020-09-08 14:20 | 20.4 |
| 2020-09-08 14:30 | 20.9 |
| 2020-09-08 14:40 | 20.8 |
| 2020-09-08 14:50 | 20.6 |
| 2020-09-08 15:00 | 20.2 |
| 2020-09-08 15:10 | 20.4 |
| 2020-09-08 15:20 | 20.8 |
| 2020-09-08 15:30 | 20.9 |
| 2020-09-08 15:40 | 20.6 |
| 2020-09-08 15:50 | 20.1 |
| 2020-09-08 16:00 | 20.3 |
| 2020-09-08 16:10 | 20.1 |
| 2020-09-08 16:20 | 20.6 |
| 2020-09-08 16:30 | 20.4 |
| 2020-09-08 16:40 | 20.6 |
| 2020-09-08 16:50 | 21.1 |
| 2020-09-08 17:00 | 20.6 |
| 2020-09-08 17:10 | 20.7 |
| 2020-09-08 17:20 | 20.3 |
| 2020-09-08 17:30 | 19.9 |
| 2020-09-08 17:40 | 19.6 |
| 2020-09-08 17:50 | 19.3 |
| 2020-09-08 18:00 | 19.1 |
| 2020-09-08 18:10 | 18.8 |
| 2020-09-08 18:20 | 18.6 |
| 2020-09-08 18:30 | 18.4 |
| 2020-09-08 18:40 | 18.3 |
| 2020-09-08 18:50 | 18.2 |
| 2020-09-08 19:00 | 18   |
| 2020-09-08 19:10 | 17.9 |
| 2020-09-08 19:20 | 17.8 |
| 2020-09-08 19:30 | 17.8 |
| 2020-09-08 19:40 | 17.6 |
| 2020-09-08 19:50 | 17.6 |
| 2020-09-08 20:00 | 17.4 |
| 2020-09-08 20:10 | 17.4 |
| 2020-09-08 20:20 | 17.3 |
| 2020-09-08 20:30 | 17.2 |
| 2020-09-08 20:40 | 17.1 |
| 2020-09-08 20:50 | 17.1 |
| 2020-09-08 21:00 | 16.8 |
| 2020-09-08 21:10 | 16.8 |
| 2020-09-08 21:20 | 16.7 |
| 2020-09-08 21:30 | 16.7 |
| 2020-09-08 21:40 | 16.7 |
| 2020-09-08 21:50 | 16.6 |
| 2020-09-08 22:00 | 16.6 |
| 2020-09-08 22:10 | 16.5 |



|                  |      |
|------------------|------|
| 2020-09-08 22:20 | 16.4 |
| 2020-09-08 22:30 | 16.4 |
| 2020-09-08 22:40 | 16.3 |
| 2020-09-08 22:50 | 16.3 |
| 2020-09-08 23:00 | 16.1 |
| 2020-09-08 23:10 | 16.1 |
| 2020-09-08 23:20 | 16.1 |
| 2020-09-08 23:30 | 16.1 |
| 2020-09-08 23:40 | 16.1 |
| 2020-09-08 23:50 | 16   |
| 2020-09-09 00:00 | 15.9 |
| 2020-09-09 00:10 | 15.9 |
| 2020-09-09 00:20 | 16   |
| 2020-09-09 00:30 | 16   |
| 2020-09-09 00:40 | 16   |
| 2020-09-09 00:50 | 16.1 |
| 2020-09-09 01:00 | 16   |
| 2020-09-09 01:10 | 16   |
| 2020-09-09 01:20 | 16   |
| 2020-09-09 01:30 | 16   |
| 2020-09-09 01:40 | 16   |
| 2020-09-09 01:50 | 16   |
| 2020-09-09 02:00 | 16   |
| 2020-09-09 02:10 | 16   |
| 2020-09-09 02:20 | 16   |
| 2020-09-09 02:30 | 15.9 |
| 2020-09-09 02:40 | 15.9 |
| 2020-09-09 02:50 | 15.9 |
| 2020-09-09 03:00 | 15.9 |
| 2020-09-09 03:10 | 15.9 |
| 2020-09-09 03:20 | 15.9 |
| 2020-09-09 03:30 | 15.9 |
| 2020-09-09 03:40 | 15.9 |
| 2020-09-09 03:50 | 16   |
| 2020-09-09 04:00 | 16   |
| 2020-09-09 04:10 | 16.1 |
| 2020-09-09 04:20 | 16.1 |
| 2020-09-09 04:30 | 16.2 |
| 2020-09-09 04:40 | 16.3 |
| 2020-09-09 04:50 | 16.3 |
| 2020-09-09 05:00 | 16.3 |
| 2020-09-09 05:10 | 16.3 |
| 2020-09-09 05:20 | 16.3 |
| 2020-09-09 05:30 | 16.3 |
| 2020-09-09 05:40 | 16.3 |
| 2020-09-09 05:50 | 16.3 |
| 2020-09-09 06:00 | 16.3 |
| 2020-09-09 06:10 | 16.3 |
| 2020-09-09 06:20 | 16.2 |
| 2020-09-09 06:30 | 16.1 |



|                  |      |
|------------------|------|
| 2020-09-09 06:40 | 16.1 |
| 2020-09-09 06:50 | 16.1 |
| 2020-09-09 07:00 | 16.1 |
| 2020-09-09 07:10 | 16.1 |
| 2020-09-09 07:20 | 16.2 |
| 2020-09-09 07:30 | 16.3 |
| 2020-09-09 07:40 | 16.5 |
| 2020-09-09 07:50 | 16.8 |
| 2020-09-09 08:00 | 16.9 |
| 2020-09-09 08:10 | 17.3 |
| 2020-09-09 08:20 | 17.8 |
| 2020-09-09 08:30 | 18.1 |
| 2020-09-09 08:40 | 18.6 |
| 2020-09-09 08:50 | 18.8 |
| 2020-09-09 09:00 | 19.4 |
| 2020-09-09 09:10 | 19.3 |
| 2020-09-09 09:20 | 20   |
| 2020-09-09 09:30 | 20.5 |
| 2020-09-09 09:40 | 20.1 |
| 2020-09-09 09:50 | 20.4 |
| 2020-09-09 10:00 | 20.9 |
| 2020-09-09 10:10 | 21.4 |
| 2020-09-09 10:20 | 21.2 |
| 2020-09-09 10:30 | 21.8 |
| 2020-09-09 10:40 | 22.3 |
| 2020-09-09 10:50 | 22.1 |
| 2020-09-09 11:00 | 22.9 |
| 2020-09-09 11:10 | 22.7 |
| 2020-09-09 11:20 | 22.9 |
| 2020-09-09 11:30 | 22.8 |
| 2020-09-09 11:40 | 23.2 |
| 2020-09-09 11:50 | 23.3 |
| 2020-09-09 12:00 | 24.5 |
| 2020-09-09 12:10 | 24.2 |
| 2020-09-09 12:20 | 24.1 |
| 2020-09-09 12:30 | 24.3 |
| 2020-09-09 12:40 | 24.4 |
| 2020-09-09 12:50 | 25.2 |
| 2020-09-09 13:00 | 27.1 |
| 2020-09-09 13:10 | 26.8 |
| 2020-09-09 13:20 | 27.1 |
| 2020-09-09 13:30 | 27.4 |
| 2020-09-09 13:40 | 27.3 |
| 2020-09-09 13:50 | 27.6 |
| 2020-09-09 14:00 | 26.9 |
| 2020-09-09 14:10 | 25.7 |
| 2020-09-09 14:20 | 25.1 |
| 2020-09-09 14:30 | 25.6 |
| 2020-09-09 14:40 | 26.3 |
| 2020-09-09 14:50 | 25.9 |



|                  |      |
|------------------|------|
| 2020-09-09 15:00 | 26.9 |
| 2020-09-09 15:10 | 26   |
| 2020-09-09 15:20 | 25.8 |
| 2020-09-09 15:30 | 25.2 |
| 2020-09-09 15:40 | 25.3 |
| 2020-09-09 15:50 | 25.9 |
| 2020-09-09 16:00 | 25.7 |
| 2020-09-09 16:10 | 25.7 |
| 2020-09-09 16:20 | 25.3 |
| 2020-09-09 16:30 | 24.7 |
| 2020-09-09 16:40 | 24.4 |
| 2020-09-09 16:50 | 24.2 |
| 2020-09-09 17:00 | 23.8 |
| 2020-09-09 17:10 | 23.5 |
| 2020-09-09 17:20 | 23.3 |
| 2020-09-09 17:30 | 23.1 |
| 2020-09-09 17:40 | 23.1 |
| 2020-09-09 17:50 | 22.7 |
| 2020-09-09 18:00 | 22.4 |
| 2020-09-09 18:10 | 22.1 |
| 2020-09-09 18:20 | 21.8 |
| 2020-09-09 18:30 | 21.5 |
| 2020-09-09 18:40 | 21.4 |
| 2020-09-09 18:50 | 21.3 |
| 2020-09-09 19:00 | 21.1 |
| 2020-09-09 19:10 | 21.1 |
| 2020-09-09 19:20 | 21.1 |
| 2020-09-09 19:30 | 20.8 |
| 2020-09-09 19:40 | 20.8 |
| 2020-09-09 19:50 | 20.6 |
| 2020-09-09 20:00 | 20.3 |
| 2020-09-09 20:10 | 20.2 |
| 2020-09-09 20:20 | 20.2 |
| 2020-09-09 20:30 | 20.1 |
| 2020-09-09 20:40 | 20.1 |
| 2020-09-09 20:50 | 20   |
| 2020-09-09 21:00 | 19.6 |
| 2020-09-09 21:10 | 19.3 |
| 2020-09-09 21:20 | 19.4 |
| 2020-09-09 21:30 | 19.5 |
| 2020-09-09 21:40 | 19.4 |
| 2020-09-09 21:50 | 19.4 |
| 2020-09-09 22:00 | 19.4 |
| 2020-09-09 22:10 | 19.3 |
| 2020-09-09 22:20 | 19.1 |
| 2020-09-09 22:30 | 18.8 |
| 2020-09-09 22:40 | 18.9 |
| 2020-09-09 22:50 | 18.8 |
| 2020-09-09 23:00 | 18.3 |
| 2020-09-09 23:10 | 18.4 |



|                  |      |
|------------------|------|
| 2020-09-09 23:20 | 18.4 |
| 2020-09-09 23:30 | 18.3 |
| 2020-09-09 23:40 | 18.1 |
| 2020-09-09 23:50 | 18.1 |
| 2020-09-10 00:00 | 18.1 |
| 2020-09-10 00:10 | 17.8 |
| 2020-09-10 00:20 | 17.7 |
| 2020-09-10 00:30 | 17.6 |
| 2020-09-10 00:40 | 17.7 |
| 2020-09-10 00:50 | 17.7 |
| 2020-09-10 01:00 | 17.7 |
| 2020-09-10 01:10 | 18.1 |
| 2020-09-10 01:20 | 18.4 |
| 2020-09-10 01:30 | 19.1 |
| 2020-09-10 01:40 | 19.7 |
| 2020-09-10 01:50 | 20.1 |
| 2020-09-10 02:00 | 20.5 |
| 2020-09-10 02:10 | 20.5 |
| 2020-09-10 02:20 | 20.2 |
| 2020-09-10 02:30 | 20.1 |
| 2020-09-10 02:40 | 20   |
| 2020-09-10 02:50 | 19.9 |
| 2020-09-10 03:00 | 19.8 |
| 2020-09-10 03:10 | 19.9 |
| 2020-09-10 03:20 | 19.7 |
| 2020-09-10 03:30 | 19.3 |
| 2020-09-10 03:40 | 18.4 |
| 2020-09-10 03:40 | 18.4 |
| 2020-09-10 03:50 | 17.9 |
| 2020-09-10 04:00 | 17.6 |
| 2020-09-10 04:10 | 17.2 |
| 2020-09-10 04:20 | 17.2 |
| 2020-09-10 04:30 | 17.2 |
| 2020-09-10 04:40 | 17.3 |
| 2020-09-10 04:50 | 17.1 |
| 2020-09-10 05:00 | 16.7 |
| 2020-09-10 05:10 | 17.1 |
| 2020-09-10 05:20 | 17.1 |
| 2020-09-10 05:40 | 16.6 |
| 2020-09-10 05:50 | 17.2 |
| 2020-09-10 06:00 | 17.3 |
| 2020-09-10 06:10 | 17.3 |
| 2020-09-10 06:20 | 17.3 |
| 2020-09-10 06:30 | 17.1 |
| 2020-09-10 06:40 | 17.1 |
| 2020-09-10 06:50 | 17.4 |
| 2020-09-10 07:00 | 17.5 |
| 2020-09-10 07:10 | 17.5 |
| 2020-09-10 07:20 | 17.6 |
| 2020-09-10 07:30 | 17.8 |



|                  |      |
|------------------|------|
| 2020-09-10 07:40 | 17.8 |
| 2020-09-10 07:50 | 18   |
| 2020-09-10 08:00 | 18   |
| 2020-09-10 08:10 | 18.1 |
| 2020-09-10 08:20 | 18.1 |
| 2020-09-10 08:30 | 18.1 |
| 2020-09-10 08:40 | 18.5 |
| 2020-09-10 08:50 | 18.6 |
| 2020-09-10 09:00 | 19   |
| 2020-09-10 09:10 | 19.3 |
| 2020-09-10 09:20 | 19.9 |
| 2020-09-10 09:30 | 19.8 |
| 2020-09-10 09:40 | 20.8 |
| 2020-09-10 09:50 | 21.3 |
| 2020-09-10 10:00 | 22.6 |
| 2020-09-10 10:10 | 22.7 |
| 2020-09-10 10:20 | 22.7 |
| 2020-09-10 10:30 | 23.1 |
| 2020-09-10 10:40 | 23.8 |
| 2020-09-10 10:50 | 24.8 |
| 2020-09-10 11:00 | 25   |
| 2020-09-10 11:10 | 26   |
| 2020-09-10 11:20 | 25.4 |
| 2020-09-10 11:30 | 26.1 |
| 2020-09-10 11:40 | 26.9 |
| 2020-09-10 11:50 | 28.1 |
| 2020-09-10 12:00 | 28.7 |
| 2020-09-10 12:10 | 28.1 |
| 2020-09-10 12:20 | 27.3 |
| 2020-09-10 12:30 | 27.4 |
| 2020-09-10 12:40 | 28.1 |
| 2020-09-10 12:50 | 29.8 |
| 2020-09-10 13:00 | 28.5 |
| 2020-09-10 13:10 | 29.6 |
| 2020-09-10 13:20 | 29.5 |
| 2020-09-10 13:30 | 29   |
| 2020-09-10 13:40 | 28.3 |
| 2020-09-10 13:50 | 29.1 |
| 2020-09-10 14:00 | 30.4 |
| 2020-09-10 14:10 | 30.9 |
| 2020-09-10 14:20 | 28.9 |
| 2020-09-10 14:30 | 28.9 |
| 2020-09-10 14:40 | 29.6 |
| 2020-09-10 14:50 | 29   |
| 2020-09-10 15:00 | 28.8 |
| 2020-09-10 15:10 | 30.5 |
| 2020-09-10 15:20 | 29.1 |
| 2020-09-10 15:30 | 29.1 |
| 2020-09-10 15:40 | 29.5 |
| 2020-09-10 15:50 | 28.6 |



|                  |      |
|------------------|------|
| 2020-09-10 16:00 | 28.4 |
| 2020-09-10 16:10 | 28.5 |
| 2020-09-10 16:20 | 28.4 |
| 2020-09-10 16:30 | 27.7 |
| 2020-09-10 16:40 | 27.9 |
| 2020-09-10 16:50 | 27.9 |
| 2020-09-10 17:00 | 27.1 |
| 2020-09-10 17:10 | 26.8 |
| 2020-09-10 17:20 | 26.5 |
| 2020-09-10 17:30 | 26.2 |
| 2020-09-10 17:40 | 26.1 |
| 2020-09-10 17:50 | 24.9 |
| 2020-09-10 18:00 | 24.6 |
| 2020-09-10 18:10 | 24.1 |
| 2020-09-10 18:20 | 23.6 |
| 2020-09-10 18:30 | 23.3 |
| 2020-09-10 18:40 | 22.9 |
| 2020-09-10 18:50 | 22.6 |
| 2020-09-10 19:00 | 22.4 |
| 2020-09-10 19:10 | 22.1 |
| 2020-09-10 19:20 | 22.1 |
| 2020-09-10 19:30 | 21.9 |
| 2020-09-10 19:40 | 21.7 |
| 2020-09-10 19:50 | 21.4 |
| 2020-09-10 20:00 | 21.1 |
| 2020-09-10 20:10 | 21   |
| 2020-09-10 20:20 | 20.8 |
| 2020-09-10 20:30 | 20.5 |
| 2020-09-10 20:40 | 20.3 |
| 2020-09-10 20:50 | 20.2 |
| 2020-09-10 21:00 | 20.3 |
| 2020-09-10 21:10 | 20.2 |
| 2020-09-10 21:20 | 20.1 |
| 2020-09-10 21:30 | 20.1 |
| 2020-09-10 21:40 | 19.9 |
| 2020-09-10 21:50 | 19.7 |
| 2020-09-10 22:00 | 19.7 |
| 2020-09-10 22:10 | 19.5 |
| 2020-09-10 22:20 | 19.3 |
| 2020-09-10 22:30 | 19.3 |
| 2020-09-10 22:40 | 19.2 |
| 2020-09-10 22:50 | 19   |
| 2020-09-10 23:00 | 18.9 |
| 2020-09-10 23:10 | 18.9 |
| 2020-09-10 23:20 | 18.8 |
| 2020-09-10 23:30 | 18.7 |
| 2020-09-10 23:40 | 18.7 |
| 2020-09-10 23:50 | 18.4 |
| 2020-09-11 00:00 | 18.3 |
| 2020-09-11 00:10 | 18.4 |



|                  |      |
|------------------|------|
| 2020-09-11 00:20 | 18.3 |
| 2020-09-11 00:30 | 18.3 |
| 2020-09-11 00:40 | 18.3 |
| 2020-09-11 00:50 | 18.1 |
| 2020-09-11 01:00 | 17.3 |
| 2020-09-11 01:10 | 17.8 |
| 2020-09-11 01:20 | 17.9 |
| 2020-09-11 01:30 | 17.5 |
| 2020-09-11 01:40 | 18   |
| 2020-09-11 01:50 | 18.2 |
| 2020-09-11 02:00 | 18   |
| 2020-09-11 02:10 | 17.9 |
| 2020-09-11 02:20 | 18.1 |
| 2020-09-11 02:30 | 18.1 |
| 2020-09-11 02:40 | 17.3 |
| 2020-09-11 02:50 | 17.9 |
| 2020-09-11 03:00 | 17.8 |
| 2020-09-11 03:10 | 17.8 |
| 2020-09-11 03:20 | 17.8 |
| 2020-09-11 03:30 | 17.8 |
| 2020-09-11 03:40 | 17.7 |
| 2020-09-11 03:50 | 17.7 |
| 2020-09-11 04:00 | 17.6 |
| 2020-09-11 04:10 | 17.5 |
| 2020-09-11 04:20 | 17.4 |
| 2020-09-11 04:30 | 17.3 |
| 2020-09-11 04:40 | 17.3 |
| 2020-09-11 04:50 | 17.1 |
| 2020-09-11 05:00 | 17.2 |
| 2020-09-11 05:10 | 17.1 |
| 2020-09-11 05:20 | 17   |
| 2020-09-11 05:30 | 16.9 |
| 2020-09-11 05:40 | 16.9 |
| 2020-09-11 05:50 | 16.9 |
| 2020-09-11 06:00 | 16.8 |
| 2020-09-11 06:10 | 16.8 |
| 2020-09-11 06:20 | 16.9 |
| 2020-09-11 06:30 | 16.8 |
| 2020-09-11 06:40 | 16.9 |
| 2020-09-11 06:50 | 16.9 |
| 2020-09-11 07:00 | 17.1 |
| 2020-09-11 07:10 | 17.3 |
| 2020-09-11 07:20 | 17.3 |
| 2020-09-11 07:30 | 17.4 |
| 2020-09-11 07:40 | 17.5 |
| 2020-09-11 07:50 | 17.6 |
| 2020-09-11 08:00 | 17.9 |
| 2020-09-11 08:10 | 18.1 |
| 2020-09-11 08:20 | 18.5 |
| 2020-09-11 08:30 | 18.8 |



|                  |      |
|------------------|------|
| 2020-09-11 08:40 | 19.4 |
| 2020-09-11 08:50 | 20   |
| 2020-09-11 09:00 | 20.2 |
| 2020-09-11 09:10 | 21.3 |
| 2020-09-11 09:20 | 22.1 |
| 2020-09-11 09:30 | 23.3 |
| 2020-09-11 09:40 | 24.9 |
| 2020-09-11 09:50 | 24.8 |
| 2020-09-11 10:00 | 26   |
| 2020-09-11 10:10 | 25   |
| 2020-09-11 10:20 | 26.9 |
| 2020-09-11 10:30 | 27.3 |
| 2020-09-11 10:40 | 27.3 |
| 2020-09-11 10:50 | 27.8 |
| 2020-09-11 11:00 | 28.1 |
| 2020-09-11 11:10 | 28.6 |
| 2020-09-11 11:20 | 28.4 |
| 2020-09-11 11:30 | 28.4 |
| 2020-09-11 11:40 | 29.8 |
| 2020-09-11 11:50 | 30.2 |
| 2020-09-11 12:00 | 29.2 |
| 2020-09-11 12:10 | 29.9 |
| 2020-09-11 12:20 | 29.6 |
| 2020-09-11 12:30 | 29.4 |
| 2020-09-11 12:40 | 29.7 |
| 2020-09-11 12:50 | 29.3 |
| 2020-09-11 13:00 | 31.1 |
| 2020-09-11 13:10 | 30.9 |
| 2020-09-11 13:20 | 31.4 |
| 2020-09-11 13:30 | 31.4 |
| 2020-09-11 13:40 | 30.9 |
| 2020-09-11 13:50 | 32.4 |
| 2020-09-11 14:00 | 32.1 |
| 2020-09-11 14:10 | 32.4 |
| 2020-09-11 14:20 | 31.5 |
| 2020-09-11 14:30 | 32.3 |
| 2020-09-11 14:40 | 31.4 |
| 2020-09-11 14:50 | 31.4 |
| 2020-09-11 15:00 | 31.4 |
| 2020-09-11 15:10 | 31.5 |
| 2020-09-11 15:20 | 31.4 |
| 2020-09-11 15:30 | 31.7 |
| 2020-09-11 15:40 | 31.1 |
| 2020-09-11 15:50 | 31.4 |
| 2020-09-11 16:00 | 31.1 |
| 2020-09-11 16:10 | 30.7 |
| 2020-09-11 16:20 | 30.9 |
| 2020-09-11 16:30 | 30.6 |
| 2020-09-11 16:40 | 29.8 |
| 2020-09-11 16:50 | 29.4 |



|                  |      |
|------------------|------|
| 2020-09-11 17:00 | 28.9 |
| 2020-09-11 17:10 | 28.9 |
| 2020-09-11 17:20 | 28.7 |
| 2020-09-11 17:30 | 28.4 |
| 2020-09-11 17:40 | 28.2 |
| 2020-09-11 17:50 | 27.9 |
| 2020-09-11 18:00 | 27.8 |
| 2020-09-11 18:10 | 27.4 |
| 2020-09-11 18:20 | 27   |
| 2020-09-11 18:30 | 26.8 |
| 2020-09-11 18:40 | 26.7 |
| 2020-09-11 18:50 | 26.4 |
| 2020-09-11 19:00 | 26.3 |
| 2020-09-11 19:10 | 26.1 |
| 2020-09-11 19:20 | 26.1 |
| 2020-09-11 19:30 | 25.9 |
| 2020-09-11 19:40 | 25.9 |
| 2020-09-11 19:50 | 26.1 |
| 2020-09-11 20:00 | 26.2 |
| 2020-09-11 20:10 | 26.2 |
| 2020-09-11 20:20 | 26.4 |
| 2020-09-11 20:30 | 26.1 |
| 2020-09-11 20:40 | 26.4 |
| 2020-09-11 20:50 | 26.6 |
| 2020-09-11 21:00 | 26.6 |
| 2020-09-11 21:10 | 26.4 |
| 2020-09-11 21:20 | 26.4 |
| 2020-09-11 21:30 | 26.4 |
| 2020-09-11 21:40 | 26.3 |
| 2020-09-11 21:50 | 26.1 |
| 2020-09-11 22:00 | 26.4 |
| 2020-09-11 22:10 | 26.1 |
| 2020-09-11 22:20 | 25.9 |
| 2020-09-11 22:30 | 25.9 |
| 2020-09-11 22:40 | 25.9 |
| 2020-09-11 22:50 | 25.8 |
| 2020-09-11 23:00 | 25.8 |
| 2020-09-11 23:10 | 25.3 |
| 2020-09-11 23:20 | 25.3 |
| 2020-09-11 23:30 | 25.2 |
| 2020-09-11 23:40 | 25.1 |
| 2020-09-11 23:50 | 25   |
| 2020-09-12 00:00 | 24.9 |
| 2020-09-12 00:10 | 24.8 |
| 2020-09-12 00:20 | 24.5 |
| 2020-09-12 00:30 | 24.6 |
| 2020-09-12 00:40 | 24.2 |
| 2020-09-12 00:50 | 24   |
| 2020-09-12 01:00 | 23.7 |
| 2020-09-12 01:10 | 23.6 |



|                  |      |
|------------------|------|
| 2020-09-12 01:20 | 23.6 |
| 2020-09-12 01:30 | 23.5 |
| 2020-09-12 01:40 | 23.4 |
| 2020-09-12 01:50 | 23.4 |
| 2020-09-12 02:00 | 23.3 |
| 2020-09-12 02:10 | 23.4 |
| 2020-09-12 02:20 | 23.4 |
| 2020-09-12 02:30 | 23.3 |
| 2020-09-12 02:40 | 23.2 |
| 2020-09-12 02:50 | 23.4 |
| 2020-09-12 03:00 | 23.3 |
| 2020-09-12 03:10 | 23.1 |
| 2020-09-12 03:20 | 23.3 |
| 2020-09-12 03:30 | 23.5 |
| 2020-09-12 03:40 | 23.4 |
| 2020-09-12 03:50 | 23.2 |
| 2020-09-12 04:00 | 23.1 |
| 2020-09-12 04:10 | 23.1 |
| 2020-09-12 04:20 | 23.3 |
| 2020-09-12 04:30 | 23.3 |
| 2020-09-12 04:40 | 23.4 |
| 2020-09-12 04:50 | 23.4 |
| 2020-09-12 05:00 | 23.4 |
| 2020-09-12 05:10 | 23.5 |
| 2020-09-12 05:20 | 23.7 |
| 2020-09-12 05:30 | 23.8 |
| 2020-09-12 05:40 | 24.4 |
| 2020-09-12 05:50 | 24.7 |
| 2020-09-12 06:00 | 24.9 |
| 2020-09-12 06:10 | 23.4 |
| 2020-09-12 06:20 | 22.8 |
| 2020-09-12 06:30 | 23.4 |
| 2020-09-12 06:40 | 24   |
| 2020-09-12 06:50 | 24.7 |
| 2020-09-12 07:00 | 24.6 |
| 2020-09-12 07:10 | 24.4 |
| 2020-09-12 07:20 | 24.3 |
| 2020-09-12 07:30 | 24.4 |
| 2020-09-12 07:40 | 25.1 |
| 2020-09-12 07:50 | 25.7 |
| 2020-09-12 08:00 | 25.3 |
| 2020-09-12 08:10 | 25.8 |
| 2020-09-12 08:20 | 25.9 |
| 2020-09-12 08:30 | 26.8 |
| 2020-09-12 08:40 | 26.8 |
| 2020-09-12 08:50 | 27.3 |
| 2020-09-12 09:00 | 27.9 |
| 2020-09-12 09:10 | 29.3 |
| 2020-09-12 09:20 | 28.7 |
| 2020-09-12 09:30 | 28.4 |



|                  |      |
|------------------|------|
| 2020-09-12 09:40 | 28.4 |
| 2020-09-12 09:50 | 29.2 |
| 2020-09-12 10:00 | 29.1 |
| 2020-09-12 10:10 | 26.1 |
| 2020-09-12 10:20 | 25.9 |
| 2020-09-12 10:30 | 26.1 |
| 2020-09-12 10:40 | 25.6 |
| 2020-09-12 10:50 | 26.4 |
| 2020-09-12 11:00 | 26.4 |
| 2020-09-12 11:10 | 27.3 |
| 2020-09-12 11:20 | 27   |
| 2020-09-12 11:30 | 26.7 |
| 2020-09-12 11:40 | 26.6 |
| 2020-09-12 11:50 | 26.6 |
| 2020-09-12 12:00 | 26.9 |
| 2020-09-12 12:10 | 26.7 |
| 2020-09-12 12:20 | 26.1 |
| 2020-09-12 12:30 | 25.8 |
| 2020-09-12 12:40 | 26.2 |
| 2020-09-12 12:50 | 25.6 |
| 2020-09-12 13:00 | 26.5 |
| 2020-09-12 13:10 | 25.5 |
| 2020-09-12 13:20 | 24.9 |
| 2020-09-12 13:30 | 24.3 |
| 2020-09-12 13:40 | 24.6 |
| 2020-09-12 13:50 | 24.6 |
| 2020-09-12 14:00 | 24.7 |
| 2020-09-12 14:10 | 24.3 |
| 2020-09-12 14:20 | 24.7 |
| 2020-09-12 14:30 | 24.6 |
| 2020-09-12 14:40 | 24.4 |
| 2020-09-12 14:50 | 23.7 |
| 2020-09-12 15:00 | 23.3 |
| 2020-09-12 15:10 | 23.3 |
| 2020-09-12 15:20 | 23.9 |
| 2020-09-12 15:30 | 23.4 |
| 2020-09-12 15:40 | 23.4 |
| 2020-09-12 15:50 | 23.1 |
| 2020-09-12 16:00 | 23.2 |
| 2020-09-12 16:10 | 22.9 |
| 2020-09-12 16:20 | 22.8 |
| 2020-09-12 16:30 | 22.5 |
| 2020-09-12 16:40 | 22.2 |
| 2020-09-12 16:50 | 21.9 |
| 2020-09-12 17:00 | 21.4 |
| 2020-09-12 17:10 | 21.1 |
| 2020-09-12 17:20 | 20.8 |
| 2020-09-12 17:30 | 20.5 |
| 2020-09-12 17:40 | 20.2 |
| 2020-09-12 17:50 | 19.8 |



|                  |      |
|------------------|------|
| 2020-09-12 18:00 | 19.6 |
| 2020-09-12 18:10 | 19.4 |
| 2020-09-12 18:20 | 19.3 |
| 2020-09-12 18:30 | 19.1 |
| 2020-09-12 18:40 | 19.1 |
| 2020-09-12 18:50 | 19   |
| 2020-09-12 19:00 | 18.9 |
| 2020-09-12 19:10 | 18.8 |
| 2020-09-12 19:20 | 18.8 |
| 2020-09-12 19:30 | 18.7 |
| 2020-09-12 19:40 | 18.6 |
| 2020-09-12 19:50 | 18.5 |
| 2020-09-12 20:00 | 18.3 |
| 2020-09-12 20:10 | 18.3 |
| 2020-09-12 20:20 | 18.3 |
| 2020-09-12 20:30 | 18.3 |
| 2020-09-12 20:40 | 18.4 |
| 2020-09-12 20:50 | 18.4 |
| 2020-09-12 21:00 | 18.3 |
| 2020-09-12 21:10 | 18.3 |
| 2020-09-12 21:20 | 18.3 |
| 2020-09-12 21:30 | 18.4 |
| 2020-09-12 21:40 | 18.1 |
| 2020-09-12 21:50 | 18.3 |
| 2020-09-12 22:00 | 18.2 |
| 2020-09-12 22:10 | 18.1 |
| 2020-09-12 22:20 | 17.9 |
| 2020-09-12 22:30 | 17.9 |
| 2020-09-12 22:40 | 17.9 |
| 2020-09-12 22:50 | 17.8 |
| 2020-09-12 23:00 | 17.7 |
| 2020-09-12 23:10 | 17.6 |
| 2020-09-12 23:20 | 17.6 |
| 2020-09-12 23:30 | 17.6 |
| 2020-09-12 23:40 | 17.6 |
| 2020-09-12 23:50 | 17.4 |
| 2020-09-13 00:00 | 17.3 |
| 2020-09-13 00:10 | 17.3 |
| 2020-09-13 00:20 | 17.3 |
| 2020-09-13 00:30 | 17.2 |
| 2020-09-13 00:40 | 17.1 |
| 2020-09-13 00:50 | 17.1 |
| 2020-09-13 01:00 | 17   |
| 2020-09-13 01:10 | 16.8 |
| 2020-09-13 01:20 | 16.8 |
| 2020-09-13 01:30 | 16.6 |
| 2020-09-13 01:40 | 16.6 |
| 2020-09-13 01:50 | 16.5 |
| 2020-09-13 02:00 | 16.4 |
| 2020-09-13 02:10 | 16.4 |



|                  |      |
|------------------|------|
| 2020-09-13 02:20 | 16.4 |
| 2020-09-13 02:30 | 16.4 |
| 2020-09-13 02:40 | 16.6 |
| 2020-09-13 02:50 | 16.8 |
| 2020-09-13 03:00 | 17   |
| 2020-09-13 03:10 | 17.4 |
| 2020-09-13 03:20 | 17.4 |
| 2020-09-13 03:30 | 17.4 |
| 2020-09-13 03:40 | 17.5 |
| 2020-09-13 03:50 | 17.5 |
| 2020-09-13 04:00 | 17.4 |
| 2020-09-13 04:10 | 17.5 |
| 2020-09-13 04:20 | 17.5 |
| 2020-09-13 04:30 | 17.6 |
| 2020-09-13 04:40 | 17.6 |
| 2020-09-13 04:50 | 17.6 |
| 2020-09-13 05:00 | 17.6 |
| 2020-09-13 05:10 | 17.4 |
| 2020-09-13 05:20 | 17.4 |
| 2020-09-13 05:30 | 17.4 |
| 2020-09-13 05:40 | 17.3 |
| 2020-09-13 05:50 | 17.2 |
| 2020-09-13 06:00 | 17.1 |
| 2020-09-13 06:10 | 17.1 |
| 2020-09-13 06:20 | 17   |
| 2020-09-13 06:30 | 16.9 |
| 2020-09-13 06:40 | 17   |
| 2020-09-13 06:50 | 17.1 |
| 2020-09-13 07:00 | 17.3 |
| 2020-09-13 07:10 | 17.3 |
| 2020-09-13 07:20 | 17.4 |
| 2020-09-13 07:30 | 17.8 |
| 2020-09-13 07:40 | 18.4 |
| 2020-09-13 07:50 | 19.1 |
| 2020-09-13 08:00 | 19.9 |
| 2020-09-13 08:10 | 20.6 |
| 2020-09-13 08:20 | 21.3 |
| 2020-09-13 08:30 | 22.3 |
| 2020-09-13 08:40 | 23.1 |
| 2020-09-13 08:50 | 23.7 |
| 2020-09-13 09:00 | 24.6 |
| 2020-09-13 09:10 | 24.9 |
| 2020-09-13 09:20 | 24.9 |
| 2020-09-13 09:30 | 25.4 |
| 2020-09-13 09:40 | 25.6 |
| 2020-09-13 09:50 | 25.1 |
| 2020-09-13 10:00 | 24.8 |
| 2020-09-13 10:10 | 25.6 |
| 2020-09-13 10:20 | 26.2 |
| 2020-09-13 10:30 | 26.6 |



|                  |      |
|------------------|------|
| 2020-09-13 10:40 | 25.8 |
| 2020-09-13 10:50 | 25.5 |
| 2020-09-13 11:00 | 25.5 |
| 2020-09-13 11:10 | 27.4 |
| 2020-09-13 11:20 | 27.3 |
| 2020-09-13 11:30 | 28.2 |
| 2020-09-13 11:40 | 27.9 |
| 2020-09-13 11:50 | 28.1 |
| 2020-09-13 12:00 | 28.2 |
| 2020-09-13 12:10 | 28.7 |
| 2020-09-13 12:20 | 30.4 |
| 2020-09-13 12:30 | 30.2 |
| 2020-09-13 12:40 | 30.4 |
| 2020-09-13 12:50 | 30.2 |
| 2020-09-13 13:00 | 30   |
| 2020-09-13 13:10 | 29.7 |
| 2020-09-13 13:20 | 30.1 |
| 2020-09-13 13:30 | 30.3 |
| 2020-09-13 13:40 | 30.9 |
| 2020-09-13 13:50 | 30.9 |
| 2020-09-13 14:00 | 30.9 |
| 2020-09-13 14:10 | 31   |
| 2020-09-13 14:20 | 30.8 |
| 2020-09-13 14:30 | 30.3 |
| 2020-09-13 14:40 | 30.6 |
| 2020-09-13 14:50 | 31.3 |
| 2020-09-13 15:00 | 31.9 |
| 2020-09-13 15:10 | 32.8 |
| 2020-09-13 15:20 | 31.4 |
| 2020-09-13 15:30 | 31.8 |
| 2020-09-13 15:40 | 32.7 |
| 2020-09-13 15:50 | 33.3 |
| 2020-09-13 16:00 | 33.3 |
| 2020-09-13 16:10 | 33.8 |
| 2020-09-13 16:20 | 32.8 |
| 2020-09-13 16:30 | 32.8 |
| 2020-09-13 16:40 | 32.1 |
| 2020-09-13 16:50 | 32.1 |
| 2020-09-13 17:00 | 31.6 |
| 2020-09-13 17:10 | 30.4 |
| 2020-09-13 17:20 | 30.2 |
| 2020-09-13 17:40 | 29.8 |
| 2020-09-13 17:50 | 29.3 |
| 2020-09-13 18:00 | 28.9 |
| 2020-09-13 18:10 | 28.6 |
| 2020-09-13 18:20 | 28.3 |
| 2020-09-13 18:30 | 27.9 |
| 2020-09-13 18:40 | 27.6 |
| 2020-09-13 18:50 | 27.6 |
| 2020-09-13 19:00 | 27.7 |



|                  |      |
|------------------|------|
| 2020-09-13 19:10 | 27.2 |
| 2020-09-13 19:20 | 27.5 |
| 2020-09-13 19:30 | 27.3 |
| 2020-09-13 19:40 | 26.8 |
| 2020-09-13 19:50 | 27.1 |
| 2020-09-13 20:00 | 26.9 |
| 2020-09-13 20:10 | 26.6 |
| 2020-09-13 20:20 | 26.5 |
| 2020-09-13 20:30 | 26.1 |
| 2020-09-13 20:40 | 25.6 |
| 2020-09-13 20:50 | 25.4 |
| 2020-09-13 21:10 | 25   |
| 2020-09-13 21:20 | 24.7 |
| 2020-09-13 21:30 | 24.6 |
| 2020-09-13 21:40 | 24.3 |
| 2020-09-13 21:50 | 24.3 |
| 2020-09-13 22:00 | 24.3 |
| 2020-09-13 22:10 | 24.7 |
| 2020-09-13 22:20 | 24.7 |
| 2020-09-13 22:30 | 24.6 |
| 2020-09-13 22:40 | 23.7 |
| 2020-09-13 22:50 | 23.9 |
| 2020-09-13 23:00 | 24   |
| 2020-09-13 23:10 | 23.7 |
| 2020-09-13 23:20 | 23.6 |
| 2020-09-13 23:30 | 23.8 |
| 2020-09-13 23:40 | 24.4 |
| 2020-09-13 23:50 | 24.6 |
| 2020-09-14 00:00 | 24.6 |
| 2020-09-14 00:10 | 24.6 |
| 2020-09-14 00:20 | 24.8 |
| 2020-09-14 00:30 | 24.9 |
| 2020-09-14 00:40 | 24.8 |
| 2020-09-14 00:50 | 23.4 |
| 2020-09-14 01:00 | 22.6 |
| 2020-09-14 01:10 | 21.9 |
| 2020-09-14 01:20 | 21.4 |
| 2020-09-14 01:30 | 20.9 |
| 2020-09-14 01:40 | 20.6 |
| 2020-09-14 01:50 | 20.4 |
| 2020-09-14 02:00 | 20.3 |
| 2020-09-14 02:10 | 20.4 |
| 2020-09-14 02:20 | 20.1 |
| 2020-09-14 02:30 | 19.6 |
| 2020-09-14 02:40 | 19.7 |
| 2020-09-14 02:50 | 19.6 |
| 2020-09-14 03:00 | 19.6 |
| 2020-09-14 03:10 | 19.6 |
| 2020-09-14 03:20 | 19.6 |
| 2020-09-14 03:30 | 19.6 |



|                  |      |
|------------------|------|
| 2020-09-14 03:40 | 19.6 |
| 2020-09-14 03:50 | 19.6 |
| 2020-09-14 04:00 | 19.5 |
| 2020-09-14 04:10 | 19.6 |
| 2020-09-14 04:20 | 19.4 |
| 2020-09-14 04:30 | 19.3 |
| 2020-09-14 04:30 | 19.3 |
| 2020-09-14 04:40 | 19.1 |
| 2020-09-14 04:50 | 18.9 |
| 2020-09-14 05:00 | 18.8 |
| 2020-09-14 05:10 | 18.9 |
| 2020-09-14 05:20 | 18.8 |
| 2020-09-14 05:30 | 18.8 |
| 2020-09-14 05:40 | 18.7 |
| 2020-09-14 05:50 | 18.8 |
| 2020-09-14 06:00 | 18.7 |
| 2020-09-14 06:10 | 18.6 |
| 2020-09-14 06:20 | 18.5 |
| 2020-09-14 06:30 | 18.4 |
| 2020-09-14 06:40 | 18.6 |
| 2020-09-14 06:50 | 18.6 |
| 2020-09-14 07:00 | 18.5 |
| 2020-09-14 07:10 | 18.3 |
| 2020-09-14 07:20 | 18.1 |
| 2020-09-14 07:30 | 17.9 |
| 2020-09-14 07:40 | 17.8 |
| 2020-09-14 07:50 | 17.8 |
| 2020-09-14 08:00 | 17.8 |
| 2020-09-14 08:10 | 17.9 |
| 2020-09-14 08:20 | 17.9 |
| 2020-09-14 08:30 | 18.1 |
| 2020-09-14 08:40 | 18.1 |
| 2020-09-14 08:50 | 18   |
| 2020-09-14 09:00 | 17.9 |
| 2020-09-14 09:10 | 18   |
| 2020-09-14 09:20 | 18   |
| 2020-09-14 09:30 | 18.2 |
| 2020-09-14 09:40 | 18.4 |
| 2020-09-14 09:50 | 18.5 |
| 2020-09-14 10:00 | 17.9 |
| 2020-09-14 10:10 | 17.8 |
| 2020-09-14 10:20 | 17.9 |
| 2020-09-14 10:30 | 17.9 |
| 2020-09-14 10:40 | 17.9 |
| 2020-09-14 10:50 | 18.3 |
| 2020-09-14 11:00 | 18.4 |
| 2020-09-14 11:10 | 18.5 |
| 2020-09-14 11:20 | 18.5 |
| 2020-09-14 11:30 | 18.4 |
| 2020-09-14 11:40 | 18.3 |



|                  |      |
|------------------|------|
| 2020-09-14 11:50 | 18.9 |
| 2020-09-14 12:00 | 18.8 |
| 2020-09-14 12:10 | 18.7 |
| 2020-09-14 12:20 | 18.7 |
| 2020-09-14 12:30 | 18.4 |
| 2020-09-14 12:40 | 18.6 |
| 2020-09-14 12:50 | 18.6 |
| 2020-09-14 13:00 | 18.4 |
| 2020-09-14 13:10 | 18.3 |
| 2020-09-14 13:20 | 18.4 |
| 2020-09-14 13:30 | 18.1 |
| 2020-09-14 13:40 | 17.8 |
| 2020-09-14 13:50 | 17.3 |
| 2020-09-14 14:00 | 16.6 |
| 2020-09-14 14:10 | 16.4 |
| 2020-09-14 14:20 | 16.3 |
| 2020-09-14 14:30 | 16.1 |
| 2020-09-14 14:40 | 16.1 |
| 2020-09-14 14:50 | 15.9 |
| 2020-09-14 15:00 | 15.8 |
| 2020-09-14 15:10 | 15.8 |
| 2020-09-14 15:20 | 15.6 |
| 2020-09-14 15:30 | 15.5 |
| 2020-09-14 15:40 | 15.3 |
| 2020-09-14 15:50 | 14.7 |
| 2020-09-14 16:00 | 14.5 |
| 2020-09-14 16:10 | 14.5 |
| 2020-09-14 16:20 | 14.4 |
| 2020-09-14 16:30 | 14.3 |
| 2020-09-14 16:40 | 14.3 |
| 2020-09-14 16:50 | 14.4 |
| 2020-09-14 17:00 | 14.3 |
| 2020-09-14 17:10 | 14.4 |
| 2020-09-14 17:20 | 14.3 |
| 2020-09-14 17:30 | 14.3 |
| 2020-09-14 17:40 | 13.5 |
| 2020-09-14 17:50 | 13.1 |
| 2020-09-14 18:00 | 12.9 |
| 2020-09-14 18:10 | 12.7 |
| 2020-09-14 18:20 | 12.3 |
| 2020-09-14 18:30 | 12.1 |
| 2020-09-14 18:40 | 12.1 |
| 2020-09-14 18:50 | 12.1 |
| 2020-09-14 19:00 | 12.1 |
| 2020-09-14 19:10 | 12   |
| 2020-09-14 19:20 | 12.1 |
| 2020-09-14 19:30 | 11.9 |
| 2020-09-14 19:40 | 12.1 |
| 2020-09-14 19:50 | 12.1 |
| 2020-09-14 20:00 | 12.1 |



|                  |      |
|------------------|------|
| 2020-09-14 20:10 | 12.1 |
| 2020-09-14 20:20 | 12.1 |
| 2020-09-14 20:30 | 12.1 |
| 2020-09-14 20:40 | 12.1 |
| 2020-09-14 20:50 | 11.9 |
| 2020-09-14 21:00 | 11.6 |
| 2020-09-14 21:10 | 11.4 |
| 2020-09-14 21:20 | 11.3 |
| 2020-09-14 21:30 | 11.3 |
| 2020-09-14 21:40 | 11.3 |
| 2020-09-14 21:50 | 11.3 |
| 2020-09-14 22:00 | 11.2 |
| 2020-09-14 22:10 | 11   |
| 2020-09-14 22:20 | 10.9 |
| 2020-09-14 22:30 | 10.8 |
| 2020-09-14 22:40 | 10.6 |
| 2020-09-14 22:50 | 10.3 |
| 2020-09-14 23:00 | 10.1 |
| 2020-09-14 23:10 | 9.9  |
| 2020-09-14 23:20 | 9.9  |
| 2020-09-14 23:30 | 10   |
| 2020-09-14 23:40 | 10   |
| 2020-09-14 23:50 | 9.8  |
| 2020-09-15 00:00 | 9.8  |
| 2020-09-15 00:10 | 9.8  |
| 2020-09-15 00:20 | 9.6  |
| 2020-09-15 00:30 | 9.4  |
| 2020-09-15 00:40 | 9.4  |
| 2020-09-15 00:50 | 9.3  |
| 2020-09-15 01:00 | 9.3  |
| 2020-09-15 01:10 | 9.1  |
| 2020-09-15 01:20 | 9.1  |
| 2020-09-15 01:30 | 9.1  |
| 2020-09-15 01:40 | 9    |
| 2020-09-15 01:50 | 8.9  |
| 2020-09-15 02:00 | 8.7  |
| 2020-09-15 02:10 | 8.6  |
| 2020-09-15 02:20 | 8.6  |
| 2020-09-15 02:30 | 8.6  |
| 2020-09-15 02:40 | 8.6  |
| 2020-09-15 02:50 | 8.6  |
| 2020-09-15 03:00 | 8.4  |
| 2020-09-15 03:10 | 8.4  |
| 2020-09-15 03:20 | 8.3  |
| 2020-09-15 03:30 | 8.3  |
| 2020-09-15 03:40 | 8.3  |
| 2020-09-15 03:50 | 8.3  |
| 2020-09-15 04:00 | 8.2  |
| 2020-09-15 04:10 | 8.1  |
| 2020-09-15 04:20 | 8.1  |



|                  |      |
|------------------|------|
| 2020-09-15 04:30 | 8.1  |
| 2020-09-15 04:40 | 7.9  |
| 2020-09-15 04:50 | 7.8  |
| 2020-09-15 05:00 | 7.8  |
| 2020-09-15 05:10 | 7.6  |
| 2020-09-15 05:20 | 7.5  |
| 2020-09-15 05:30 | 7.4  |
| 2020-09-15 05:40 | 7.4  |
| 2020-09-15 05:50 | 7.5  |
| 2020-09-15 06:00 | 7.5  |
| 2020-09-15 06:10 | 7.5  |
| 2020-09-15 06:20 | 7.6  |
| 2020-09-15 06:30 | 7.5  |
| 2020-09-15 06:40 | 7.6  |
| 2020-09-15 06:50 | 7.6  |
| 2020-09-15 07:00 | 7.8  |
| 2020-09-15 07:10 | 7.9  |
| 2020-09-15 07:20 | 8.1  |
| 2020-09-15 07:30 | 8.4  |
| 2020-09-15 07:40 | 8.9  |
| 2020-09-15 07:50 | 9.1  |
| 2020-09-15 08:00 | 9.9  |
| 2020-09-15 08:10 | 10.7 |
| 2020-09-15 08:20 | 11.1 |
| 2020-09-15 08:30 | 12.3 |
| 2020-09-15 08:40 | 13.7 |
| 2020-09-15 08:50 | 14.4 |
| 2020-09-15 09:00 | 15.1 |
| 2020-09-15 09:10 | 16.9 |
| 2020-09-15 09:20 | 16.6 |
| 2020-09-15 09:30 | 15.9 |
| 2020-09-15 09:40 | 15.4 |
| 2020-09-15 09:50 | 15.3 |
| 2020-09-15 10:00 | 16.6 |
| 2020-09-15 10:10 | 16.4 |
| 2020-09-15 10:20 | 16.8 |
| 2020-09-15 10:30 | 17.1 |
| 2020-09-15 10:40 | 18.7 |
| 2020-09-15 10:50 | 19.2 |
| 2020-09-15 11:00 | 18.9 |
| 2020-09-15 11:10 | 18.6 |
| 2020-09-15 11:20 | 17.9 |
| 2020-09-15 11:30 | 17.9 |
| 2020-09-15 11:40 | 18.8 |
| 2020-09-15 11:50 | 18.9 |
| 2020-09-15 12:00 | 19.1 |
| 2020-09-15 12:10 | 18.5 |
| 2020-09-15 12:20 | 18   |
| 2020-09-15 12:30 | 17.8 |
| 2020-09-15 12:40 | 17.6 |



|                  |      |
|------------------|------|
| 2020-09-15 12:50 | 17.4 |
| 2020-09-15 13:00 | 17.3 |
| 2020-09-15 13:10 | 17.3 |
| 2020-09-15 13:20 | 17.4 |
| 2020-09-15 13:30 | 17.3 |
| 2020-09-15 13:40 | 17.1 |
| 2020-09-15 13:50 | 17.1 |
| 2020-09-15 14:00 | 17   |
| 2020-09-15 14:10 | 17.4 |
| 2020-09-15 14:20 | 18.2 |
| 2020-09-15 14:30 | 18.2 |
| 2020-09-15 14:40 | 18.5 |
| 2020-09-15 14:50 | 18.1 |
| 2020-09-15 15:00 | 18.1 |
| 2020-09-15 15:10 | 17.9 |
| 2020-09-15 15:20 | 17.4 |
| 2020-09-15 15:30 | 17.5 |
| 2020-09-15 15:40 | 17.7 |
| 2020-09-15 15:50 | 17.6 |
| 2020-09-15 16:00 | 17.2 |
| 2020-09-15 16:10 | 17.3 |
| 2020-09-15 16:20 | 17   |
| 2020-09-15 16:30 | 16.5 |
| 2020-09-15 16:40 | 16.3 |
| 2020-09-15 16:50 | 16.1 |
| 2020-09-15 17:00 | 16   |
| 2020-09-15 17:10 | 15.8 |
| 2020-09-15 17:20 | 15.6 |
| 2020-09-15 17:30 | 15.4 |
| 2020-09-15 17:40 | 15.3 |
| 2020-09-15 17:50 | 15.2 |
| 2020-09-15 18:00 | 15.1 |
| 2020-09-15 18:10 | 15   |
| 2020-09-15 18:30 | 14.8 |
| 2020-09-15 18:40 | 14.7 |
| 2020-09-15 18:50 | 14.6 |
| 2020-09-15 19:00 | 14.5 |
| 2020-09-15 19:10 | 14.4 |
| 2020-09-15 19:20 | 14.4 |
| 2020-09-15 19:30 | 14.4 |
| 2020-09-15 19:40 | 14.4 |
| 2020-09-15 19:50 | 14.4 |
| 2020-09-15 20:00 | 14.4 |
| 2020-09-15 20:10 | 14.3 |
| 2020-09-15 20:20 | 14.3 |
| 2020-09-15 20:30 | 14.3 |
| 2020-09-15 20:40 | 14.3 |
| 2020-09-15 20:50 | 14.4 |
| 2020-09-15 21:00 | 14.4 |
| 2020-09-15 21:10 | 14.5 |



|                  |      |
|------------------|------|
| 2020-09-15 21:20 | 14.4 |
| 2020-09-15 21:30 | 14.4 |
| 2020-09-15 21:40 | 14.3 |
| 2020-09-15 21:50 | 14.3 |
| 2020-09-15 22:00 | 14.3 |
| 2020-09-15 22:10 | 14.3 |
| 2020-09-15 22:20 | 14.3 |
| 2020-09-15 22:30 | 14.3 |
| 2020-09-15 22:40 | 14.3 |
| 2020-09-15 22:50 | 14.1 |
| 2020-09-15 23:00 | 14.1 |
| 2020-09-15 23:10 | 14.1 |
| 2020-09-15 23:20 | 14.1 |
| 2020-09-15 23:30 | 13.9 |
| 2020-09-15 23:40 | 13.9 |
| 2020-09-15 23:50 | 14   |
| 2020-09-16 00:00 | 14.1 |
| 2020-09-16 00:10 | 14   |
| 2020-09-16 00:20 | 13.9 |
| 2020-09-16 00:30 | 14   |
| 2020-09-16 00:40 | 13.9 |
| 2020-09-16 00:50 | 13.9 |
| 2020-09-16 01:00 | 13.8 |
| 2020-09-16 01:10 | 13.8 |
| 2020-09-16 01:20 | 13.8 |
| 2020-09-16 01:30 | 13.8 |
| 2020-09-16 01:40 | 13.8 |
| 2020-09-16 01:50 | 13.8 |
| 2020-09-16 02:00 | 13.8 |
| 2020-09-16 02:10 | 13.8 |
| 2020-09-16 02:20 | 13.8 |
| 2020-09-16 02:30 | 13.8 |
| 2020-09-16 02:40 | 13.8 |
| 2020-09-16 02:50 | 13.9 |
| 2020-09-16 03:00 | 13.8 |
| 2020-09-16 03:10 | 13.8 |
| 2020-09-16 03:20 | 13.8 |
| 2020-09-16 03:30 | 13.8 |
| 2020-09-16 03:40 | 13.8 |
| 2020-09-16 03:50 | 13.8 |
| 2020-09-16 04:00 | 13.8 |
| 2020-09-16 04:10 | 13.6 |
| 2020-09-16 04:20 | 13.4 |
| 2020-09-16 04:30 | 13.3 |
| 2020-09-16 04:40 | 13.1 |
| 2020-09-16 04:50 | 12.9 |
| 2020-09-16 05:00 | 13   |
| 2020-09-16 05:10 | 13   |
| 2020-09-16 05:20 | 12.9 |
| 2020-09-16 05:30 | 12.9 |



|                  |      |
|------------------|------|
| 2020-09-16 05:40 | 12.9 |
| 2020-09-16 05:50 | 13   |
| 2020-09-16 06:00 | 12.9 |
| 2020-09-16 06:10 | 12.9 |
| 2020-09-16 06:20 | 12.7 |
| 2020-09-16 06:30 | 12.6 |
| 2020-09-16 06:40 | 12.5 |
| 2020-09-16 06:50 | 12.5 |
| 2020-09-16 07:00 | 12.6 |
| 2020-09-16 07:10 | 12.7 |
| 2020-09-16 07:20 | 12.7 |
| 2020-09-16 07:30 | 12.8 |
| 2020-09-16 07:40 | 12.9 |
| 2020-09-16 07:50 | 13.1 |
| 2020-09-16 08:00 | 13.1 |
| 2020-09-16 08:10 | 13.2 |
| 2020-09-16 08:20 | 13.2 |
| 2020-09-16 08:30 | 13.3 |
| 2020-09-16 08:40 | 13.4 |
| 2020-09-16 08:50 | 13.6 |
| 2020-09-16 09:00 | 13.6 |
| 2020-09-16 09:10 | 13.8 |
| 2020-09-16 09:20 | 13.6 |
| 2020-09-16 09:30 | 13.6 |
| 2020-09-16 09:40 | 13.6 |
| 2020-09-16 09:50 | 13.8 |
| 2020-09-16 10:00 | 13.9 |
| 2020-09-16 10:10 | 13.9 |
| 2020-09-16 10:20 | 13.9 |
| 2020-09-16 10:30 | 13.9 |
| 2020-09-16 10:40 | 13.9 |
| 2020-09-16 10:50 | 14   |
| 2020-09-16 11:00 | 14   |
| 2020-09-16 11:10 | 14.1 |
| 2020-09-16 11:20 | 14.2 |
| 2020-09-16 11:30 | 14.3 |
| 2020-09-16 11:40 | 14.4 |
| 2020-09-16 11:50 | 14.5 |
| 2020-09-16 12:00 | 14.6 |
| 2020-09-16 12:10 | 14.9 |
| 2020-09-16 12:20 | 14.9 |
| 2020-09-16 12:30 | 14.9 |
| 2020-09-16 12:40 | 14.8 |
| 2020-09-16 12:50 | 14.7 |
| 2020-09-16 13:00 | 14.4 |
| 2020-09-16 13:10 | 14.3 |
| 2020-09-16 13:20 | 14.5 |
| 2020-09-16 13:30 | 14.6 |
| 2020-09-16 13:40 | 14.6 |
| 2020-09-16 13:50 | 14.7 |



|                  |      |
|------------------|------|
| 2020-09-16 14:00 | 14.8 |
| 2020-09-16 14:10 | 14.9 |
| 2020-09-16 14:20 | 14.8 |
| 2020-09-16 14:30 | 14.6 |
| 2020-09-16 14:40 | 14.6 |
| 2020-09-16 14:50 | 14.6 |
| 2020-09-16 15:00 | 14.6 |
| 2020-09-16 15:10 | 14.6 |
| 2020-09-16 15:20 | 14.6 |
| 2020-09-16 15:30 | 14.4 |
| 2020-09-16 15:40 | 14.6 |
| 2020-09-16 15:50 | 14.5 |
| 2020-09-16 16:00 | 14.6 |
| 2020-09-16 16:10 | 14.5 |
| 2020-09-16 16:20 | 14.6 |
| 2020-09-16 16:30 | 14.5 |
| 2020-09-16 16:40 | 14.4 |
| 2020-09-16 16:50 | 14.4 |
| 2020-09-16 17:00 | 14.4 |
| 2020-09-16 17:10 | 14.4 |
| 2020-09-16 17:20 | 14.3 |
| 2020-09-16 17:30 | 14.3 |
| 2020-09-16 17:40 | 14.3 |
| 2020-09-16 17:50 | 14.2 |
| 2020-09-16 18:00 | 14.2 |
| 2020-09-16 18:10 | 14.1 |
| 2020-09-16 18:20 | 14.1 |
| 2020-09-16 18:30 | 14.1 |
| 2020-09-16 18:40 | 13.9 |
| 2020-09-16 18:50 | 13.9 |
| 2020-09-16 19:00 | 13.9 |
| 2020-09-16 19:10 | 13.8 |
| 2020-09-16 19:20 | 13.8 |
| 2020-09-16 19:30 | 13.8 |
| 2020-09-16 19:40 | 13.8 |
| 2020-09-16 19:50 | 13.8 |
| 2020-09-16 20:00 | 13.9 |
| 2020-09-16 20:10 | 13.9 |
| 2020-09-16 20:20 | 13.9 |
| 2020-09-16 20:30 | 13.9 |
| 2020-09-16 20:30 | 13.9 |
| 2020-09-16 20:40 | 13.9 |
| 2020-09-16 20:50 | 14   |
| 2020-09-16 21:00 | 14   |
| 2020-09-16 21:10 | 14   |
| 2020-09-16 21:20 | 13.9 |
| 2020-09-16 21:30 | 13.9 |
| 2020-09-16 21:40 | 13.9 |
| 2020-09-16 21:50 | 13.9 |
| 2020-09-16 22:00 | 13.9 |



|                  |      |
|------------------|------|
| 2020-09-16 22:10 | 13.9 |
| 2020-09-16 22:20 | 13.9 |
| 2020-09-16 22:30 | 13.8 |
| 2020-09-16 22:40 | 13.8 |
| 2020-09-16 22:50 | 13.8 |
| 2020-09-16 23:00 | 13.8 |
| 2020-09-16 23:10 | 13.8 |
| 2020-09-16 23:20 | 13.9 |
| 2020-09-16 23:30 | 14   |
| 2020-09-16 23:40 | 13.9 |
| 2020-09-16 23:50 | 13.9 |
| 2020-09-17 00:00 | 13.9 |
| 2020-09-17 00:10 | 13.9 |
| 2020-09-17 00:20 | 13.9 |
| 2020-09-17 00:30 | 13.9 |
| 2020-09-17 00:40 | 13.9 |
| 2020-09-17 00:50 | 13.9 |
| 2020-09-17 01:00 | 13.9 |
| 2020-09-17 01:10 | 13.9 |
| 2020-09-17 01:20 | 13.9 |
| 2020-09-17 01:30 | 13.8 |
| 2020-09-17 01:40 | 13.8 |
| 2020-09-17 01:50 | 13.8 |
| 2020-09-17 02:00 | 13.8 |
| 2020-09-17 02:10 | 13.8 |
| 2020-09-17 02:20 | 13.9 |
| 2020-09-17 02:30 | 13.9 |
| 2020-09-17 02:40 | 13.9 |
| 2020-09-17 02:50 | 13.9 |
| 2020-09-17 03:00 | 13.9 |
| 2020-09-17 03:10 | 14   |
| 2020-09-17 03:20 | 13.9 |
| 2020-09-17 03:30 | 13.9 |
| 2020-09-17 03:40 | 13.9 |
| 2020-09-17 03:50 | 13.8 |
| 2020-09-17 04:00 | 13.9 |
| 2020-09-17 04:10 | 13.8 |
| 2020-09-17 04:20 | 13.8 |
| 2020-09-17 04:30 | 13.6 |
| 2020-09-17 04:40 | 13.6 |
| 2020-09-17 04:50 | 13.6 |
| 2020-09-17 05:00 | 13.6 |
| 2020-09-17 05:10 | 13.6 |
| 2020-09-17 05:20 | 13.6 |
| 2020-09-17 05:30 | 13.5 |
| 2020-09-17 05:40 | 13.5 |
| 2020-09-17 05:50 | 13.4 |
| 2020-09-17 06:00 | 13.6 |
| 2020-09-17 06:10 | 13.6 |
| 2020-09-17 06:20 | 13.6 |



|                  |      |
|------------------|------|
| 2020-09-17 06:30 | 13.6 |
| 2020-09-17 06:40 | 13.6 |
| 2020-09-17 06:50 | 13.6 |
| 2020-09-17 07:00 | 13.8 |
| 2020-09-17 07:10 | 13.8 |
| 2020-09-17 07:20 | 13.8 |
| 2020-09-17 07:30 | 13.9 |
| 2020-09-17 07:40 | 14.2 |
| 2020-09-17 07:50 | 14.3 |
| 2020-09-17 08:00 | 14.3 |
| 2020-09-17 08:10 | 14.4 |
| 2020-09-17 08:20 | 14.6 |
| 2020-09-17 08:30 | 14.7 |
| 2020-09-17 08:40 | 14.7 |
| 2020-09-17 08:50 | 14.8 |
| 2020-09-17 09:00 | 14.8 |
| 2020-09-17 09:10 | 14.9 |
| 2020-09-17 09:20 | 14.9 |
| 2020-09-17 09:30 | 15   |
| 2020-09-17 09:40 | 15.3 |
| 2020-09-17 09:50 | 15.3 |
| 2020-09-17 10:00 | 15.4 |
| 2020-09-17 10:10 | 15.9 |
| 2020-09-17 10:20 | 15.9 |
| 2020-09-17 10:30 | 16.1 |
| 2020-09-17 10:40 | 16.5 |
| 2020-09-17 10:50 | 16.6 |
| 2020-09-17 11:00 | 16.4 |
| 2020-09-17 11:10 | 16.4 |
| 2020-09-17 11:20 | 16.8 |
| 2020-09-17 11:30 | 16.9 |
| 2020-09-17 11:40 | 17.4 |
| 2020-09-17 11:50 | 17.9 |
| 2020-09-17 12:00 | 18.8 |
| 2020-09-17 12:10 | 19.1 |
| 2020-09-17 12:20 | 19.3 |
| 2020-09-17 12:30 | 19.6 |
| 2020-09-17 12:40 | 20.1 |
| 2020-09-17 12:50 | 20.5 |
| 2020-09-17 13:00 | 20.7 |
| 2020-09-17 13:10 | 21.3 |
| 2020-09-17 13:20 | 22.3 |
| 2020-09-17 13:30 | 22.9 |
| 2020-09-17 13:40 | 22.1 |
| 2020-09-17 13:50 | 22   |
| 2020-09-17 14:00 | 21.8 |
| 2020-09-17 14:10 | 22.4 |
| 2020-09-17 14:20 | 23.5 |
| 2020-09-17 14:30 | 23.4 |
| 2020-09-17 14:40 | 23.3 |



|                  |      |
|------------------|------|
| 2020-09-17 14:50 | 22.7 |
| 2020-09-17 15:00 | 21.8 |
| 2020-09-17 15:10 | 22.6 |
| 2020-09-17 15:20 | 22   |
| 2020-09-17 15:30 | 22.2 |
| 2020-09-17 15:40 | 22.1 |
| 2020-09-17 15:50 | 22.3 |
| 2020-09-17 16:00 | 23.7 |
| 2020-09-17 16:10 | 22.4 |
| 2020-09-17 16:20 | 22.5 |
| 2020-09-17 16:30 | 22.6 |
| 2020-09-17 16:40 | 22.6 |
| 2020-09-17 16:50 | 21.9 |
| 2020-09-17 17:00 | 20.6 |
| 2020-09-17 17:10 | 20.2 |
| 2020-09-17 17:20 | 20.6 |
| 2020-09-17 17:30 | 20.5 |
| 2020-09-17 17:40 | 19.9 |
| 2020-09-17 17:50 | 19.5 |
| 2020-09-17 18:00 | 19.1 |
| 2020-09-17 18:10 | 18.8 |
| 2020-09-17 18:20 | 18.5 |
| 2020-09-17 18:30 | 18.3 |
| 2020-09-17 18:40 | 18.1 |
| 2020-09-17 18:50 | 18   |
| 2020-09-17 19:00 | 17.8 |
| 2020-09-17 19:10 | 17.7 |
| 2020-09-17 19:20 | 17.4 |
| 2020-09-17 19:30 | 17.6 |
| 2020-09-17 19:40 | 17.3 |
| 2020-09-17 19:50 | 17   |
| 2020-09-17 20:00 | 17.1 |
| 2020-09-17 20:10 | 17   |
| 2020-09-17 20:20 | 16.8 |
| 2020-09-17 20:30 | 16.8 |
| 2020-09-17 20:40 | 16.6 |
| 2020-09-17 20:50 | 16.3 |
| 2020-09-17 21:00 | 16.8 |
| 2020-09-17 21:10 | 16.9 |
| 2020-09-17 21:20 | 17.1 |
| 2020-09-17 21:30 | 17.3 |
| 2020-09-17 21:40 | 17.3 |
| 2020-09-17 21:50 | 17   |
| 2020-09-17 22:00 | 16.9 |
| 2020-09-17 22:10 | 16.8 |
| 2020-09-17 22:20 | 16.8 |
| 2020-09-17 22:30 | 17.1 |
| 2020-09-17 22:40 | 16.9 |
| 2020-09-17 22:50 | 16.7 |
| 2020-09-17 23:00 | 16.1 |



|                  |      |
|------------------|------|
| 2020-09-17 23:10 | 15.8 |
| 2020-09-17 23:20 | 15.6 |
| 2020-09-17 23:30 | 15.3 |
| 2020-09-17 23:40 | 15   |
| 2020-09-17 23:50 | 15.4 |
| 2020-09-18 00:00 | 15.1 |
| 2020-09-18 00:10 | 14.8 |
| 2020-09-18 00:20 | 14.9 |
| 2020-09-18 00:30 | 15.3 |
| 2020-09-18 00:40 | 15.3 |
| 2020-09-18 00:50 | 15.1 |
| 2020-09-18 01:00 | 14.8 |
| 2020-09-18 01:10 | 15.1 |
| 2020-09-18 01:20 | 14.5 |
| 2020-09-18 01:30 | 13.9 |
| 2020-09-18 01:40 | 13.6 |
| 2020-09-18 01:50 | 13.6 |
| 2020-09-18 02:00 | 13.4 |
| 2020-09-18 02:10 | 13.4 |
| 2020-09-18 02:20 | 13.3 |
| 2020-09-18 02:30 | 13.3 |
| 2020-09-18 02:40 | 13.4 |
| 2020-09-18 02:50 | 13.4 |
| 2020-09-18 03:00 | 13.1 |
| 2020-09-18 03:10 | 13.4 |
| 2020-09-18 03:20 | 13.4 |
| 2020-09-18 03:30 | 13.2 |
| 2020-09-18 03:40 | 13.6 |
| 2020-09-18 03:50 | 13.6 |
| 2020-09-18 04:00 | 13.3 |
| 2020-09-18 04:10 | 13.2 |
| 2020-09-18 04:20 | 13.1 |
| 2020-09-18 04:30 | 13   |
| 2020-09-18 04:40 | 13.2 |
| 2020-09-18 04:50 | 13.2 |
| 2020-09-18 05:00 | 12.9 |
| 2020-09-18 05:10 | 12.8 |
| 2020-09-18 05:20 | 12.6 |
| 2020-09-18 05:30 | 12.4 |
| 2020-09-18 05:40 | 12.2 |
| 2020-09-18 05:50 | 11.9 |
| 2020-09-18 06:00 | 11.9 |
| 2020-09-18 06:10 | 11.8 |
| 2020-09-18 06:20 | 11.8 |
| 2020-09-18 06:30 | 12   |
| 2020-09-18 06:40 | 12.2 |
| 2020-09-18 06:50 | 12.4 |
| 2020-09-18 07:00 | 12.6 |
| 2020-09-18 07:10 | 12.9 |
| 2020-09-18 07:20 | 13.3 |



|                  |      |
|------------------|------|
| 2020-09-18 07:30 | 13.6 |
| 2020-09-18 07:40 | 13.8 |
| 2020-09-18 07:50 | 14.3 |
| 2020-09-18 08:00 | 14.6 |
| 2020-09-18 08:10 | 14.6 |
| 2020-09-18 08:20 | 14.8 |
| 2020-09-18 08:30 | 14.8 |
| 2020-09-18 08:40 | 14.9 |
| 2020-09-18 08:50 | 15.2 |
| 2020-09-18 09:00 | 15.4 |
| 2020-09-18 09:10 | 15.4 |
| 2020-09-18 09:20 | 15.7 |
| 2020-09-18 09:30 | 15.8 |
| 2020-09-18 09:40 | 16.1 |
| 2020-09-18 09:50 | 16.3 |
| 2020-09-18 10:00 | 16.8 |
| 2020-09-18 10:10 | 16.8 |
| 2020-09-18 10:20 | 17.3 |
| 2020-09-18 10:30 | 17.2 |
| 2020-09-18 10:40 | 17.4 |
| 2020-09-18 10:50 | 17.9 |
| 2020-09-18 11:00 | 18.4 |
| 2020-09-18 11:10 | 18.3 |
| 2020-09-18 11:20 | 18.6 |
| 2020-09-18 11:30 | 18.9 |
| 2020-09-18 11:40 | 19   |
| 2020-09-18 11:50 | 20.6 |
| 2020-09-18 12:00 | 21.8 |
| 2020-09-18 12:10 | 22.1 |
| 2020-09-18 12:20 | 23.3 |
| 2020-09-18 12:30 | 24.4 |
| 2020-09-18 12:40 | 24.8 |
| 2020-09-18 12:50 | 25.1 |
| 2020-09-18 13:00 | 24.4 |
| 2020-09-18 13:10 | 25   |
| 2020-09-18 13:20 | 27.2 |
| 2020-09-18 13:30 | 24.2 |
| 2020-09-18 13:40 | 23.6 |
| 2020-09-18 13:50 | 24.5 |
| 2020-09-18 14:00 | 26.4 |
| 2020-09-18 14:10 | 28.6 |
| 2020-09-18 14:20 | 26.4 |
| 2020-09-18 14:30 | 24.7 |
| 2020-09-18 14:40 | 25.6 |
| 2020-09-18 14:50 | 25.9 |
| 2020-09-18 15:00 | 27.2 |
| 2020-09-18 15:10 | 27.2 |
| 2020-09-18 15:20 | 26.4 |
| 2020-09-18 15:30 | 27.3 |
| 2020-09-18 15:40 | 26.6 |



|                  |      |
|------------------|------|
| 2020-09-18 15:50 | 25.8 |
| 2020-09-18 16:00 | 26.3 |
| 2020-09-18 16:10 | 27.2 |
| 2020-09-18 16:20 | 26.1 |
| 2020-09-18 16:30 | 25.8 |
| 2020-09-18 16:40 | 25   |
| 2020-09-18 16:50 | 25.3 |
| 2020-09-18 17:00 | 23.5 |
| 2020-09-18 17:10 | 22.4 |
| 2020-09-18 17:20 | 22.4 |
| 2020-09-18 17:30 | 23   |
| 2020-09-18 17:40 | 22.9 |
| 2020-09-18 17:50 | 22.2 |
| 2020-09-18 18:00 | 21.9 |
| 2020-09-18 18:10 | 21.6 |
| 2020-09-18 18:20 | 20.9 |
| 2020-09-18 18:30 | 20.3 |
| 2020-09-18 18:40 | 20   |
| 2020-09-18 18:50 | 19.7 |
| 2020-09-18 19:00 | 19.6 |
| 2020-09-18 19:10 | 19.3 |
| 2020-09-18 19:20 | 19.3 |
| 2020-09-18 19:30 | 18.8 |
| 2020-09-18 19:40 | 18.4 |
| 2020-09-18 19:50 | 18.4 |
| 2020-09-18 20:00 | 18.3 |
| 2020-09-18 20:10 | 18   |
| 2020-09-18 20:20 | 17.6 |
| 2020-09-18 20:30 | 17.3 |
| 2020-09-18 20:40 | 16.8 |
| 2020-09-18 20:50 | 16.8 |
| 2020-09-18 20:50 | 16.6 |
| 2020-09-18 21:00 | 16.6 |
| 2020-09-18 21:10 | 16.8 |
| 2020-09-18 21:10 | 16.9 |
| 2020-09-18 21:20 | 16.6 |
| 2020-09-18 21:30 | 16.9 |
| 2020-09-18 21:40 | 16.6 |
| 2020-09-18 21:50 | 16.1 |
| 2020-09-18 22:00 | 16.2 |
| 2020-09-18 22:10 | 16.5 |
| 2020-09-18 22:20 | 16.4 |
| 2020-09-18 22:30 | 16.8 |
| 2020-09-18 22:40 | 16.9 |
| 2020-09-18 22:50 | 16.5 |
| 2020-09-18 23:00 | 16.8 |
| 2020-09-18 23:10 | 16.6 |
| 2020-09-18 23:20 | 16.6 |
| 2020-09-18 23:30 | 16.6 |
| 2020-09-18 23:40 | 16.4 |



|                  |      |
|------------------|------|
| 2020-09-18 23:50 | 16.6 |
| 2020-09-19 00:00 | 16.8 |
| 2020-09-19 00:10 | 16.6 |
| 2020-09-19 00:20 | 16.7 |
| 2020-09-19 00:30 | 16.6 |
| 2020-09-19 00:40 | 16.3 |
| 2020-09-19 00:50 | 16.6 |
| 2020-09-19 01:00 | 17   |
| 2020-09-19 01:10 | 16.3 |
| 2020-09-19 01:20 | 15.9 |
| 2020-09-19 01:30 | 16.1 |
| 2020-09-19 01:40 | 15.7 |
| 2020-09-19 01:50 | 15.9 |
| 2020-09-19 02:00 | 16.1 |
| 2020-09-19 02:10 | 15.9 |
| 2020-09-19 02:20 | 15.7 |
| 2020-09-19 02:30 | 15.2 |
| 2020-09-19 02:40 | 14.8 |
| 2020-09-19 02:50 | 14.1 |
| 2020-09-19 03:00 | 13.9 |
| 2020-09-19 03:10 | 13.9 |
| 2020-09-19 03:20 | 13.9 |
| 2020-09-19 03:30 | 13.4 |
| 2020-09-19 03:40 | 13.3 |
| 2020-09-19 03:50 | 13   |
| 2020-09-19 04:00 | 13.1 |
| 2020-09-19 04:10 | 13   |
| 2020-09-19 04:20 | 13.2 |
| 2020-09-19 04:30 | 13.5 |
| 2020-09-19 04:40 | 13.8 |
| 2020-09-19 04:50 | 13.4 |
| 2020-09-19 05:00 | 13.6 |
| 2020-09-19 05:10 | 13.5 |
| 2020-09-19 05:20 | 13.1 |
| 2020-09-19 05:30 | 12.8 |
| 2020-09-19 05:40 | 12.6 |
| 2020-09-19 05:50 | 12.7 |
| 2020-09-19 06:00 | 13   |
| 2020-09-19 06:10 | 12.8 |
| 2020-09-19 06:20 | 13.8 |
| 2020-09-19 06:30 | 13.7 |
| 2020-09-19 06:40 | 13.6 |
| 2020-09-19 06:50 | 13.4 |
| 2020-09-19 07:00 | 13.6 |
| 2020-09-19 07:10 | 14.2 |
| 2020-09-19 07:20 | 15.8 |
| 2020-09-19 07:30 | 17.6 |
| 2020-09-19 07:40 | 18.8 |
| 2020-09-19 07:50 | 19.6 |
| 2020-09-19 08:00 | 20.8 |



|                  |      |
|------------------|------|
| 2020-09-19 08:10 | 21.6 |
| 2020-09-19 08:20 | 23.1 |
| 2020-09-19 08:30 | 23.3 |
| 2020-09-19 08:40 | 22.6 |
| 2020-09-19 08:50 | 22.7 |
| 2020-09-19 09:00 | 22.8 |
| 2020-09-19 09:10 | 23.7 |
| 2020-09-19 09:20 | 23.3 |
| 2020-09-19 09:30 | 23.7 |
| 2020-09-19 09:40 | 24.3 |
| 2020-09-19 09:50 | 22.6 |
| 2020-09-19 10:00 | 23.6 |
| 2020-09-19 10:10 | 23.1 |
| 2020-09-19 10:20 | 22.8 |
| 2020-09-19 10:30 | 23.2 |
| 2020-09-19 10:40 | 24.3 |
| 2020-09-19 10:50 | 24   |
| 2020-09-19 11:00 | 24.2 |
| 2020-09-19 11:10 | 24.7 |
| 2020-09-19 11:20 | 23.8 |
| 2020-09-19 11:30 | 25   |
| 2020-09-19 11:40 | 25.6 |
| 2020-09-19 11:50 | 25.9 |
| 2020-09-19 12:00 | 25.8 |
| 2020-09-19 12:10 | 26.3 |
| 2020-09-19 12:20 | 25.8 |
| 2020-09-19 12:30 | 26.4 |
| 2020-09-19 12:40 | 26.8 |
| 2020-09-19 12:50 | 26.8 |
| 2020-09-19 13:00 | 26.6 |
| 2020-09-19 13:10 | 25.9 |
| 2020-09-19 13:20 | 27.1 |
| 2020-09-19 13:30 | 27.1 |
| 2020-09-19 13:40 | 27.4 |
| 2020-09-19 13:50 | 26.3 |
| 2020-09-19 14:00 | 25.9 |
| 2020-09-19 14:10 | 26.8 |
| 2020-09-19 14:20 | 26.8 |
| 2020-09-19 14:30 | 25.9 |
| 2020-09-19 14:40 | 26.7 |
| 2020-09-19 14:50 | 26.7 |
| 2020-09-19 15:00 | 25.4 |
| 2020-09-19 15:10 | 25.3 |
| 2020-09-19 15:20 | 25.5 |
| 2020-09-19 15:30 | 23.8 |
| 2020-09-19 15:40 | 25.1 |
| 2020-09-19 15:50 | 23.3 |
| 2020-09-19 16:00 | 23.8 |
| 2020-09-19 16:10 | 22.9 |
| 2020-09-19 16:20 | 23.8 |



|                  |      |
|------------------|------|
| 2020-09-19 16:30 | 23.8 |
| 2020-09-19 16:40 | 23.5 |
| 2020-09-19 16:50 | 23.8 |
| 2020-09-19 17:00 | 23   |
| 2020-09-19 17:10 | 22.3 |
| 2020-09-19 17:20 | 21.8 |
| 2020-09-19 17:30 | 21.1 |
| 2020-09-19 17:40 | 21.1 |
| 2020-09-19 17:50 | 20.6 |
| 2020-09-19 18:00 | 19.9 |
| 2020-09-19 18:10 | 19.3 |
| 2020-09-19 18:20 | 18.7 |
| 2020-09-19 18:30 | 18.4 |
| 2020-09-19 18:40 | 17.9 |
| 2020-09-19 18:50 | 17.7 |
| 2020-09-19 19:00 | 17.4 |
| 2020-09-19 19:10 | 17.3 |
| 2020-09-19 19:20 | 17.1 |
| 2020-09-19 19:20 | 17.1 |
| 2020-09-19 19:30 | 16.8 |
| 2020-09-19 19:40 | 16.6 |
| 2020-09-19 19:50 | 16.3 |
| 2020-09-19 20:00 | 16.1 |
| 2020-09-19 20:10 | 15.8 |
| 2020-09-19 20:20 | 15.4 |
| 2020-09-19 20:30 | 15.2 |
| 2020-09-19 20:40 | 15   |
| 2020-09-19 20:50 | 14.9 |
| 2020-09-19 21:00 | 14.7 |
| 2020-09-19 21:10 | 14.5 |
| 2020-09-19 21:20 | 14.3 |
| 2020-09-19 21:30 | 14.1 |
| 2020-09-19 21:40 | 13.9 |
| 2020-09-19 21:50 | 13.8 |
| 2020-09-19 22:00 | 13.6 |
| 2020-09-19 22:10 | 13.4 |
| 2020-09-19 22:20 | 13.3 |
| 2020-09-19 22:30 | 13.1 |
| 2020-09-19 22:40 | 12.8 |
| 2020-09-19 22:50 | 12.6 |
| 2020-09-19 23:00 | 12.6 |
| 2020-09-19 23:10 | 12.5 |
| 2020-09-19 23:20 | 12.5 |
| 2020-09-19 23:30 | 12.4 |
| 2020-09-19 23:40 | 12.3 |
| 2020-09-19 23:50 | 12.3 |
| 2020-09-20 00:00 | 12.1 |
| 2020-09-20 00:10 | 12.2 |
| 2020-09-20 00:20 | 12.2 |
| 2020-09-20 00:30 | 12.2 |



|                  |      |
|------------------|------|
| 2020-09-20 00:40 | 12.1 |
| 2020-09-20 00:50 | 12.1 |
| 2020-09-20 01:00 | 11.8 |
| 2020-09-20 01:10 | 11.7 |
| 2020-09-20 01:20 | 11.5 |
| 2020-09-20 01:30 | 11.5 |
| 2020-09-20 01:40 | 11.4 |
| 2020-09-20 01:50 | 11.2 |
| 2020-09-20 02:00 | 11.1 |
| 2020-09-20 02:10 | 10.9 |
| 2020-09-20 02:20 | 10.8 |
| 2020-09-20 02:30 | 10.5 |
| 2020-09-20 02:40 | 10.4 |
| 2020-09-20 02:50 | 10.3 |
| 2020-09-20 03:00 | 10.2 |
| 2020-09-20 03:10 | 10.3 |
| 2020-09-20 03:20 | 10.1 |
| 2020-09-20 03:30 | 10.1 |
| 2020-09-20 03:40 | 10.2 |
| 2020-09-20 03:50 | 10.1 |
| 2020-09-20 04:00 | 10.2 |
| 2020-09-20 04:10 | 10.1 |
| 2020-09-20 04:20 | 10.1 |
| 2020-09-20 04:30 | 10.1 |
| 2020-09-20 04:40 | 9.9  |
| 2020-09-20 04:50 | 9.9  |
| 2020-09-20 05:00 | 9.9  |
| 2020-09-20 05:10 | 9.9  |
| 2020-09-20 05:20 | 9.7  |
| 2020-09-20 05:30 | 9.7  |
| 2020-09-20 05:40 | 9.4  |
| 2020-09-20 05:50 | 9.1  |
| 2020-09-20 06:00 | 9.1  |
| 2020-09-20 06:10 | 9    |
| 2020-09-20 06:20 | 8.8  |
| 2020-09-20 06:30 | 8.8  |
| 2020-09-20 06:40 | 8.6  |
| 2020-09-20 06:50 | 8.3  |
| 2020-09-20 07:00 | 7.9  |
| 2020-09-20 07:10 | 7.9  |
| 2020-09-20 07:20 | 7.9  |
| 2020-09-20 07:30 | 8.3  |
| 2020-09-20 07:40 | 8.8  |
| 2020-09-20 07:50 | 9    |
| 2020-09-20 08:00 | 9.4  |
| 2020-09-20 08:10 | 9.4  |
| 2020-09-20 08:20 | 9.6  |
| 2020-09-20 08:30 | 10.3 |
| 2020-09-20 08:40 | 10.6 |
| 2020-09-20 08:50 | 11   |



|                  |      |
|------------------|------|
| 2020-09-20 09:00 | 11.3 |
| 2020-09-20 09:10 | 11.4 |
| 2020-09-20 09:20 | 11.7 |
| 2020-09-20 09:30 | 12.3 |
| 2020-09-20 09:40 | 12.9 |
| 2020-09-20 09:50 | 13.1 |
| 2020-09-20 10:00 | 14.5 |
| 2020-09-20 10:10 | 14.3 |
| 2020-09-20 10:20 | 15.1 |
| 2020-09-20 10:30 | 16.3 |
| 2020-09-20 10:40 | 15.8 |
| 2020-09-20 10:50 | 15.9 |
| 2020-09-20 11:00 | 16.2 |
| 2020-09-20 11:10 | 17.2 |
| 2020-09-20 11:20 | 17.8 |
| 2020-09-20 11:30 | 17.2 |
| 2020-09-20 11:40 | 17.4 |
| 2020-09-20 11:50 | 17.5 |
| 2020-09-20 12:00 | 18.6 |
| 2020-09-20 12:10 | 18.7 |
| 2020-09-20 12:20 | 18.1 |
| 2020-09-20 12:30 | 18.1 |
| 2020-09-20 12:40 | 18.5 |
| 2020-09-20 12:50 | 19.7 |
| 2020-09-20 13:00 | 19.4 |
| 2020-09-20 13:10 | 19.6 |
| 2020-09-20 13:20 | 20.1 |
| 2020-09-20 13:30 | 20.4 |
| 2020-09-20 13:40 | 20.8 |
| 2020-09-20 13:50 | 20.6 |
| 2020-09-20 14:00 | 21   |
| 2020-09-20 14:10 | 20.8 |
| 2020-09-20 14:20 | 20.3 |
| 2020-09-20 14:30 | 20.8 |
| 2020-09-20 14:40 | 21.8 |
| 2020-09-20 14:50 | 20.3 |
| 2020-09-20 15:00 | 20.6 |
| 2020-09-20 15:10 | 20.9 |
| 2020-09-20 15:20 | 20.9 |
| 2020-09-20 15:30 | 21.3 |
| 2020-09-20 15:40 | 20.3 |
| 2020-09-20 15:50 | 21.2 |
| 2020-09-20 16:00 | 21.3 |
| 2020-09-20 16:10 | 20.1 |
| 2020-09-20 16:20 | 20.6 |
| 2020-09-20 16:30 | 20.1 |
| 2020-09-20 16:40 | 19.9 |
| 2020-09-20 16:50 | 20.7 |
| 2020-09-20 17:00 | 20.6 |
| 2020-09-20 17:10 | 19.6 |



|                  |      |
|------------------|------|
| 2020-09-20 17:20 | 18.9 |
| 2020-09-20 17:30 | 18.5 |
| 2020-09-20 17:40 | 18.6 |
| 2020-09-20 17:50 | 18.4 |
| 2020-09-20 18:00 | 17.6 |
| 2020-09-20 18:10 | 16.7 |
| 2020-09-20 18:20 | 15.8 |
| 2020-09-20 18:30 | 14.7 |
| 2020-09-20 18:40 | 14.2 |
| 2020-09-20 18:50 | 13.8 |
| 2020-09-20 19:00 | 13.3 |
| 2020-09-20 19:10 | 13.1 |
| 2020-09-20 19:20 | 12.9 |
| 2020-09-20 19:30 | 12.6 |
| 2020-09-20 19:40 | 12.2 |
| 2020-09-20 19:50 | 11.9 |
| 2020-09-20 20:00 | 11.7 |
| 2020-09-20 20:10 | 11.6 |
| 2020-09-20 20:20 | 11.1 |
| 2020-09-20 20:30 | 11   |
| 2020-09-20 20:40 | 10.9 |
| 2020-09-20 20:50 | 10.8 |
| 2020-09-20 21:00 | 10.8 |
| 2020-09-20 21:10 | 10.6 |
| 2020-09-20 21:20 | 10.6 |
| 2020-09-20 21:30 | 10.3 |
| 2020-09-20 21:40 | 10.1 |
| 2020-09-20 21:50 | 9.9  |
| 2020-09-20 22:00 | 9.7  |
| 2020-09-20 22:10 | 9.6  |
| 2020-09-20 22:20 | 9.4  |
| 2020-09-20 22:30 | 9.1  |
| 2020-09-20 22:40 | 8.9  |
| 2020-09-20 22:50 | 8.8  |
| 2020-09-20 23:00 | 8.4  |
| 2020-09-20 23:10 | 8.1  |
| 2020-09-20 23:20 | 7.9  |
| 2020-09-20 23:30 | 7.7  |
| 2020-09-20 23:40 | 7.6  |
| 2020-09-20 23:50 | 7.4  |
| 2020-09-21 00:10 | 7.1  |
| 2020-09-21 00:20 | 6.8  |
| 2020-09-21 00:30 | 6.6  |
| 2020-09-21 00:40 | 6.4  |
| 2020-09-21 00:50 | 6.3  |
| 2020-09-21 01:00 | 6.3  |
| 2020-09-21 01:10 | 6.3  |
| 2020-09-21 01:20 | 6.2  |
| 2020-09-21 01:30 | 6.1  |
| 2020-09-21 01:40 | 5.9  |



|                  |      |
|------------------|------|
| 2020-09-21 01:50 | 5.8  |
| 2020-09-21 02:00 | 5.9  |
| 2020-09-21 02:10 | 5.8  |
| 2020-09-21 02:20 | 5.8  |
| 2020-09-21 02:30 | 5.7  |
| 2020-09-21 02:40 | 5.6  |
| 2020-09-21 02:50 | 5.5  |
| 2020-09-21 03:00 | 5.4  |
| 2020-09-21 03:10 | 5.3  |
| 2020-09-21 03:20 | 5.3  |
| 2020-09-21 03:30 | 5.3  |
| 2020-09-21 03:40 | 5.3  |
| 2020-09-21 03:50 | 5    |
| 2020-09-21 04:00 | 4.9  |
| 2020-09-21 04:10 | 4.8  |
| 2020-09-21 04:20 | 4.8  |
| 2020-09-21 04:30 | 4.7  |
| 2020-09-21 04:40 | 4.7  |
| 2020-09-21 04:50 | 4.6  |
| 2020-09-21 05:00 | 4.6  |
| 2020-09-21 05:10 | 4.8  |
| 2020-09-21 05:20 | 5    |
| 2020-09-21 05:30 | 5.2  |
| 2020-09-21 05:40 | 5.4  |
| 2020-09-21 05:50 | 5.4  |
| 2020-09-21 06:00 | 5.6  |
| 2020-09-21 06:10 | 5.6  |
| 2020-09-21 06:20 | 5.7  |
| 2020-09-21 06:30 | 5.8  |
| 2020-09-21 06:40 | 5.9  |
| 2020-09-21 06:50 | 5.8  |
| 2020-09-21 07:00 | 5.9  |
| 2020-09-21 07:10 | 6.3  |
| 2020-09-21 07:20 | 6.5  |
| 2020-09-21 07:30 | 6.7  |
| 2020-09-21 07:40 | 7.1  |
| 2020-09-21 07:50 | 7.1  |
| 2020-09-21 08:00 | 7.1  |
| 2020-09-21 08:10 | 7.1  |
| 2020-09-21 08:20 | 7.3  |
| 2020-09-21 08:30 | 7.1  |
| 2020-09-21 08:40 | 7.8  |
| 2020-09-21 08:50 | 7.8  |
| 2020-09-21 09:00 | 8.3  |
| 2020-09-21 09:10 | 9.3  |
| 2020-09-21 09:20 | 9.8  |
| 2020-09-21 09:30 | 11.4 |
| 2020-09-21 09:40 | 12.1 |
| 2020-09-21 09:50 | 13.3 |
| 2020-09-21 10:00 | 13.7 |



|                  |      |
|------------------|------|
| 2020-09-21 10:10 | 13.9 |
| 2020-09-21 10:20 | 14.2 |
| 2020-09-21 10:30 | 14.9 |
| 2020-09-21 10:40 | 15.2 |
| 2020-09-21 10:50 | 16.1 |
| 2020-09-21 11:00 | 15.6 |
| 2020-09-21 11:10 | 17.1 |
| 2020-09-21 11:20 | 16.6 |
| 2020-09-21 11:30 | 17.3 |
| 2020-09-21 11:40 | 16.9 |
| 2020-09-21 11:50 | 17.4 |
| 2020-09-21 12:00 | 18.6 |
| 2020-09-21 12:10 | 20.1 |
| 2020-09-21 12:20 | 18.8 |
| 2020-09-21 12:30 | 19.1 |
| 2020-09-21 12:40 | 20.5 |
| 2020-09-21 12:50 | 20.9 |
| 2020-09-21 13:00 | 20.7 |
| 2020-09-21 13:10 | 19.8 |
| 2020-09-21 13:20 | 20.9 |
| 2020-09-21 13:30 | 20.4 |
| 2020-09-21 13:40 | 20.4 |
| 2020-09-21 13:50 | 20.4 |
| 2020-09-21 14:00 | 21.9 |
| 2020-09-21 14:10 | 21.4 |
| 2020-09-21 14:20 | 21.1 |
| 2020-09-21 14:30 | 21.3 |
| 2020-09-21 14:40 | 20.7 |
| 2020-09-21 14:50 | 21.6 |
| 2020-09-21 15:00 | 21.1 |
| 2020-09-21 15:10 | 21.5 |
| 2020-09-21 15:20 | 22.7 |
| 2020-09-21 15:30 | 21.1 |
| 2020-09-21 15:40 | 21.1 |
| 2020-09-21 15:50 | 21.7 |
| 2020-09-21 16:00 | 21.8 |
| 2020-09-21 16:10 | 20.8 |
| 2020-09-21 16:20 | 21.3 |
| 2020-09-21 16:30 | 20.9 |
| 2020-09-21 16:40 | 19.6 |
| 2020-09-21 16:50 | 20.4 |
| 2020-09-21 17:00 | 19.4 |
| 2020-09-21 17:10 | 19.1 |
| 2020-09-21 17:20 | 18.9 |
| 2020-09-21 17:30 | 18.1 |
| 2020-09-21 17:40 | 17.8 |
| 2020-09-21 17:50 | 17.6 |
| 2020-09-21 18:00 | 17   |
| 2020-09-21 18:10 | 16.4 |
| 2020-09-21 18:20 | 16   |



|                  |      |
|------------------|------|
| 2020-09-21 18:30 | 15.3 |
| 2020-09-21 18:40 | 14.6 |
| 2020-09-21 18:50 | 14.3 |
| 2020-09-21 19:00 | 13.8 |
| 2020-09-21 19:10 | 13.4 |
| 2020-09-21 19:20 | 13.1 |
| 2020-09-21 19:30 | 12.9 |
| 2020-09-21 19:40 | 12.6 |
| 2020-09-21 19:50 | 12.3 |
| 2020-09-21 20:00 | 12.3 |
| 2020-09-21 20:10 | 11.9 |
| 2020-09-21 20:20 | 11.8 |
| 2020-09-21 20:30 | 11.8 |
| 2020-09-21 20:40 | 11.5 |
| 2020-09-21 20:50 | 11.4 |
| 2020-09-21 21:00 | 11.1 |
| 2020-09-21 21:10 | 11.3 |
| 2020-09-21 21:20 | 11.3 |
| 2020-09-21 21:30 | 11.1 |
| 2020-09-21 21:40 | 10.7 |
| 2020-09-21 21:50 | 10.6 |
| 2020-09-21 22:00 | 10.4 |
| 2020-09-21 22:10 | 10.2 |
| 2020-09-21 22:20 | 10.1 |
| 2020-09-21 22:30 | 9.8  |
| 2020-09-21 22:40 | 9.6  |
| 2020-09-21 22:50 | 9.3  |
| 2020-09-21 23:00 | 9.1  |
| 2020-09-21 23:10 | 8.8  |
| 2020-09-21 23:20 | 8.8  |
| 2020-09-21 23:30 | 8.6  |
| 2020-09-21 23:40 | 8.3  |
| 2020-09-21 23:50 | 8.4  |
| 2020-09-22 00:00 | 8.3  |
| 2020-09-22 00:10 | 8.3  |
| 2020-09-22 00:20 | 8.3  |
| 2020-09-22 00:30 | 8.1  |
| 2020-09-22 00:40 | 8    |
| 2020-09-22 00:50 | 8.1  |
| 2020-09-22 01:00 | 8.2  |
| 2020-09-22 01:10 | 8.1  |
| 2020-09-22 01:20 | 7.8  |
| 2020-09-22 01:30 | 7.6  |
| 2020-09-22 01:40 | 7.4  |
| 2020-09-22 01:50 | 7.4  |
| 2020-09-22 02:00 | 7.2  |
| 2020-09-22 02:10 | 7    |
| 2020-09-22 02:20 | 6.9  |
| 2020-09-22 02:30 | 6.8  |
| 2020-09-22 02:40 | 6.4  |



|                  |      |
|------------------|------|
| 2020-09-22 02:50 | 6.4  |
| 2020-09-22 03:00 | 6.5  |
| 2020-09-22 03:10 | 6.4  |
| 2020-09-22 03:20 | 6.4  |
| 2020-09-22 03:30 | 6.4  |
| 2020-09-22 03:40 | 6.3  |
| 2020-09-22 03:50 | 6.1  |
| 2020-09-22 04:00 | 5.9  |
| 2020-09-22 04:10 | 5.4  |
| 2020-09-22 04:20 | 5.4  |
| 2020-09-22 04:30 | 5.3  |
| 2020-09-22 04:40 | 4.8  |
| 2020-09-22 04:50 | 4.8  |
| 2020-09-22 05:00 | 4.2  |
| 2020-09-22 05:10 | 4.4  |
| 2020-09-22 05:20 | 4.4  |
| 2020-09-22 05:30 | 4.7  |
| 2020-09-22 05:40 | 4.5  |
| 2020-09-22 05:50 | 4.6  |
| 2020-09-22 06:00 | 4.6  |
| 2020-09-22 06:10 | 4.7  |
| 2020-09-22 06:20 | 4.8  |
| 2020-09-22 06:30 | 4.9  |
| 2020-09-22 06:40 | 5.3  |
| 2020-09-22 06:50 | 4.9  |
| 2020-09-22 07:00 | 5    |
| 2020-09-22 07:10 | 5.7  |
| 2020-09-22 07:20 | 7.1  |
| 2020-09-22 07:30 | 9.8  |
| 2020-09-22 07:40 | 10.9 |
| 2020-09-22 07:50 | 11.6 |
| 2020-09-22 08:00 | 12.4 |
| 2020-09-22 08:10 | 12.6 |
| 2020-09-22 08:20 | 12.8 |
| 2020-09-22 08:30 | 13.3 |
| 2020-09-22 08:40 | 14.1 |
| 2020-09-22 08:50 | 14.1 |
| 2020-09-22 09:00 | 14.6 |
| 2020-09-22 09:10 | 15.2 |
| 2020-09-22 09:20 | 16.1 |
| 2020-09-22 09:30 | 16.7 |
| 2020-09-22 09:40 | 17.4 |
| 2020-09-22 09:50 | 17.1 |
| 2020-09-22 10:00 | 17.8 |
| 2020-09-22 10:10 | 18.2 |
| 2020-09-22 10:10 | 18.3 |
| 2020-09-22 10:20 | 19.6 |
| 2020-09-22 10:30 | 20.6 |
| 2020-09-22 10:40 | 20.1 |
| 2020-09-22 10:50 | 20.1 |



|                  |      |
|------------------|------|
| 2020-09-22 11:00 | 20.8 |
| 2020-09-22 11:10 | 21.1 |
| 2020-09-22 11:20 | 22.1 |
| 2020-09-22 11:30 | 22.6 |
| 2020-09-22 11:40 | 22.2 |
| 2020-09-22 11:50 | 22.8 |
| 2020-09-22 12:00 | 23.1 |
| 2020-09-22 12:10 | 23.3 |
| 2020-09-22 12:10 | 23.2 |
| 2020-09-22 12:20 | 24.4 |
| 2020-09-22 12:30 | 24.1 |
| 2020-09-22 12:40 | 25.6 |
| 2020-09-22 12:50 | 25.3 |
| 2020-09-22 13:00 | 25.8 |
| 2020-09-22 13:10 | 25.8 |
| 2020-09-22 13:20 | 25   |
| 2020-09-22 13:30 | 26.4 |
| 2020-09-22 13:50 | 26.8 |
| 2020-09-22 14:00 | 25.9 |
| 2020-09-22 14:10 | 27.8 |
| 2020-09-22 14:20 | 26.9 |
| 2020-09-22 14:30 | 27.4 |
| 2020-09-22 14:40 | 26.8 |
| 2020-09-22 14:50 | 27.2 |
| 2020-09-22 15:00 | 26.1 |
| 2020-09-22 15:10 | 27   |
| 2020-09-22 15:20 | 28.5 |
| 2020-09-22 15:30 | 26.6 |
| 2020-09-22 15:40 | 26.8 |
| 2020-09-22 15:50 | 26.9 |
| 2020-09-22 16:00 | 26.2 |
| 2020-09-22 16:10 | 26.6 |
| 2020-09-22 16:20 | 26.8 |
| 2020-09-22 16:30 | 26   |
| 2020-09-22 16:40 | 26.1 |
| 2020-09-22 16:50 | 26.1 |
| 2020-09-22 17:00 | 25.8 |
| 2020-09-22 17:10 | 25.1 |
| 2020-09-22 17:20 | 25.3 |
| 2020-09-22 17:30 | 24.3 |
| 2020-09-22 17:40 | 23.6 |
| 2020-09-22 17:50 | 22.4 |
| 2020-09-22 18:00 | 22   |
| 2020-09-22 18:10 | 21.8 |
| 2020-09-22 18:20 | 20.5 |
| 2020-09-22 18:30 | 19.7 |
| 2020-09-22 18:40 | 19.3 |
| 2020-09-22 18:50 | 19   |
| 2020-09-22 19:00 | 18.9 |
| 2020-09-22 19:10 | 18.4 |



|                  |      |
|------------------|------|
| 2020-09-22 19:30 | 18.1 |
| 2020-09-22 19:40 | 17.5 |
| 2020-09-22 19:50 | 17   |
| 2020-09-22 20:00 | 17.1 |
| 2020-09-22 20:10 | 16.9 |
| 2020-09-22 20:20 | 16.6 |
| 2020-09-22 20:30 | 17.4 |
| 2020-09-22 20:40 | 16.9 |
| 2020-09-22 20:50 | 16.6 |
| 2020-09-22 21:00 | 16.4 |
| 2020-09-22 21:10 | 15.9 |
| 2020-09-22 21:20 | 15.6 |
| 2020-09-22 21:30 | 15.1 |
| 2020-09-22 21:40 | 14.9 |
| 2020-09-22 21:50 | 14.6 |
| 2020-09-22 22:00 | 14.6 |
| 2020-09-22 22:10 | 14.8 |
| 2020-09-22 22:20 | 14.9 |
| 2020-09-22 22:30 | 14.9 |
| 2020-09-22 22:40 | 14.9 |
| 2020-09-22 22:50 | 14.7 |
| 2020-09-22 23:00 | 14.5 |
| 2020-09-22 23:10 | 14.4 |
| 2020-09-22 23:20 | 14.3 |
| 2020-09-22 23:30 | 14.1 |
| 2020-09-22 23:40 | 14   |
| 2020-09-22 23:50 | 13.9 |
| 2020-09-23 00:00 | 13.7 |
| 2020-09-23 00:10 | 13.6 |
| 2020-09-23 00:20 | 13.3 |
| 2020-09-23 00:30 | 13.2 |
| 2020-09-23 00:40 | 12.9 |
| 2020-09-23 00:50 | 12.8 |
| 2020-09-23 01:00 | 12.6 |
| 2020-09-23 01:10 | 12.3 |
| 2020-09-23 01:20 | 11.9 |
| 2020-09-23 01:30 | 11.6 |
| 2020-09-23 01:40 | 11.4 |
| 2020-09-23 01:50 | 11.2 |
| 2020-09-23 02:00 | 11   |
| 2020-09-23 02:10 | 10.9 |
| 2020-09-23 02:30 | 10.7 |
| 2020-09-23 02:40 | 10.6 |
| 2020-09-23 02:50 | 10.4 |
| 2020-09-23 03:00 | 10.4 |
| 2020-09-23 03:10 | 10.3 |
| 2020-09-23 03:20 | 10.2 |
| 2020-09-23 03:30 | 10.1 |
| 2020-09-23 03:40 | 10.1 |
| 2020-09-23 03:50 | 9.9  |



|                  |      |
|------------------|------|
| 2020-09-23 04:00 | 9.9  |
| 2020-09-23 04:10 | 9.9  |
| 2020-09-23 04:20 | 9.8  |
| 2020-09-23 04:30 | 9.8  |
| 2020-09-23 04:40 | 9.6  |
| 2020-09-23 04:50 | 9.6  |
| 2020-09-23 05:00 | 9.5  |
| 2020-09-23 05:10 | 9.4  |
| 2020-09-23 05:20 | 9.3  |
| 2020-09-23 05:30 | 9.2  |
| 2020-09-23 05:40 | 9.3  |
| 2020-09-23 05:50 | 9.1  |
| 2020-09-23 06:00 | 9.1  |
| 2020-09-23 06:10 | 9.1  |
| 2020-09-23 06:20 | 9    |
| 2020-09-23 06:30 | 9.1  |
| 2020-09-23 06:40 | 9.1  |
| 2020-09-23 06:50 | 9.3  |
| 2020-09-23 07:00 | 9.4  |
| 2020-09-23 07:10 | 9.9  |
| 2020-09-23 07:10 | 10   |
| 2020-09-23 07:20 | 10.6 |
| 2020-09-23 07:30 | 11.3 |
| 2020-09-23 07:40 | 11.9 |
| 2020-09-23 07:50 | 12.6 |
| 2020-09-23 08:00 | 13.3 |
| 2020-09-23 08:10 | 13.9 |
| 2020-09-23 08:20 | 14.8 |
| 2020-09-23 08:30 | 15.4 |
| 2020-09-23 08:40 | 15.6 |
| 2020-09-23 08:50 | 16.1 |
| 2020-09-23 09:00 | 15.9 |
| 2020-09-23 09:10 | 16.3 |
| 2020-09-23 09:20 | 17.4 |
| 2020-09-23 09:30 | 18.4 |
| 2020-09-23 09:50 | 19.1 |
| 2020-09-23 10:00 | 19.8 |
| 2020-09-23 10:10 | 20.1 |
| 2020-09-23 10:20 | 20.5 |
| 2020-09-23 10:30 | 21.4 |
| 2020-09-23 10:40 | 21.8 |
| 2020-09-23 10:50 | 22.1 |
| 2020-09-23 11:00 | 23.6 |
| 2020-09-23 11:10 | 22.6 |
| 2020-09-23 11:20 | 24.3 |
| 2020-09-23 11:30 | 24.3 |
| 2020-09-23 11:40 | 24.6 |
| 2020-09-23 11:50 | 25.4 |
| 2020-09-23 12:10 | 25.2 |
| 2020-09-23 12:20 | 26.1 |



|                  |      |
|------------------|------|
| 2020-09-23 12:30 | 26.6 |
| 2020-09-23 12:40 | 27.3 |
| 2020-09-23 12:50 | 27.4 |
| 2020-09-23 13:00 | 26.1 |
| 2020-09-23 13:10 | 27.8 |
| 2020-09-23 13:20 | 27.8 |
| 2020-09-23 13:30 | 26.4 |
| 2020-09-23 13:40 | 28.9 |
| 2020-09-23 13:50 | 28.1 |
| 2020-09-23 14:00 | 27.7 |
| 2020-09-23 14:10 | 28.4 |
| 2020-09-23 14:20 | 29   |
| 2020-09-23 14:30 | 27.4 |
| 2020-09-23 14:40 | 26.4 |
| 2020-09-23 14:50 | 25.1 |
| 2020-09-23 15:00 | 25.4 |
| 2020-09-23 15:10 | 24.8 |
| 2020-09-23 15:20 | 24.6 |
| 2020-09-23 15:30 | 24.8 |
| 2020-09-23 15:40 | 26.1 |
| 2020-09-23 15:50 | 28.8 |
| 2020-09-23 16:00 | 28.7 |
| 2020-09-23 16:10 | 27.4 |
| 2020-09-23 16:20 | 27.3 |
| 2020-09-23 16:30 | 26.1 |
| 2020-09-23 16:40 | 25.1 |
| 2020-09-23 16:50 | 24.3 |
| 2020-09-23 17:00 | 24.1 |
| 2020-09-23 17:10 | 25.4 |
| 2020-09-23 17:20 | 26.1 |
| 2020-09-23 17:30 | 25.8 |
| 2020-09-23 17:40 | 25.4 |
| 2020-09-23 17:50 | 24.4 |
| 2020-09-23 18:00 | 23.8 |
| 2020-09-23 18:10 | 23   |
| 2020-09-23 18:20 | 22.3 |
| 2020-09-23 18:30 | 21.7 |
| 2020-09-23 18:40 | 21.3 |
| 2020-09-23 18:50 | 20.8 |
| 2020-09-23 19:00 | 20.6 |
| 2020-09-23 19:10 | 20.6 |
| 2020-09-23 19:20 | 20.5 |
| 2020-09-23 19:30 | 20.3 |
| 2020-09-23 19:40 | 20.2 |
| 2020-09-23 19:50 | 19.8 |
| 2020-09-23 20:00 | 19.6 |
| 2020-09-23 20:10 | 19.3 |
| 2020-09-23 20:20 | 19   |
| 2020-09-23 20:30 | 18.9 |
| 2020-09-23 20:40 | 19.1 |



|                  |      |
|------------------|------|
| 2020-09-23 20:50 | 18.8 |
| 2020-09-23 21:00 | 18.6 |
| 2020-09-23 21:10 | 18.5 |
| 2020-09-23 21:20 | 18.3 |
| 2020-09-23 21:30 | 17.4 |
| 2020-09-23 21:40 | 16.7 |
| 2020-09-23 21:50 | 16.5 |
| 2020-09-23 22:00 | 16.4 |
| 2020-09-23 22:10 | 15.7 |
| 2020-09-23 22:20 | 16.7 |
| 2020-09-23 22:30 | 17.6 |
| 2020-09-23 22:40 | 17.1 |
| 2020-09-23 22:50 | 16.6 |
| 2020-09-23 23:00 | 16.2 |
| 2020-09-23 23:10 | 15.9 |
| 2020-09-23 23:20 | 15.4 |
| 2020-09-23 23:30 | 14.9 |
| 2020-09-23 23:40 | 14.3 |
| 2020-09-23 23:50 | 14.6 |
| 2020-09-24 00:00 | 15   |
| 2020-09-24 00:10 | 15.1 |
| 2020-09-24 00:20 | 14.9 |
| 2020-09-24 00:30 | 14.8 |
| 2020-09-24 00:40 | 14.8 |
| 2020-09-24 00:50 | 14.8 |
| 2020-09-24 01:00 | 14.6 |
| 2020-09-24 01:10 | 14.6 |
| 2020-09-24 01:20 | 14.5 |
| 2020-09-24 01:30 | 14.3 |
| 2020-09-24 01:40 | 14.1 |
| 2020-09-24 01:50 | 14.1 |
| 2020-09-24 02:00 | 14.1 |
| 2020-09-24 02:10 | 14.1 |
| 2020-09-24 02:20 | 13.8 |
| 2020-09-24 02:30 | 13.8 |
| 2020-09-24 02:40 | 13.6 |
| 2020-09-24 02:50 | 13.5 |
| 2020-09-24 03:00 | 13.4 |
| 2020-09-24 03:10 | 13.4 |
| 2020-09-24 03:20 | 13.3 |
| 2020-09-24 03:30 | 13.1 |
| 2020-09-24 03:40 | 13.1 |
| 2020-09-24 03:50 | 13.1 |
| 2020-09-24 04:00 | 12.9 |
| 2020-09-24 04:10 | 12.9 |
| 2020-09-24 04:20 | 12.8 |
| 2020-09-24 04:30 | 12.6 |
| 2020-09-24 04:40 | 12.4 |
| 2020-09-24 04:50 | 12.3 |
| 2020-09-24 05:00 | 12.1 |



|                  |      |
|------------------|------|
| 2020-09-24 05:10 | 11.9 |
| 2020-09-24 05:20 | 11.4 |
| 2020-09-24 05:30 | 11.6 |
| 2020-09-24 05:40 | 11.6 |
| 2020-09-24 05:50 | 11.4 |
| 2020-09-24 06:00 | 11.5 |
| 2020-09-24 06:10 | 11.3 |
| 2020-09-24 06:20 | 11.2 |
| 2020-09-24 06:30 | 11.3 |
| 2020-09-24 06:40 | 11.3 |
| 2020-09-24 06:50 | 11.4 |
| 2020-09-24 07:00 | 11.6 |
| 2020-09-24 07:10 | 12.4 |
| 2020-09-24 07:20 | 13.1 |
| 2020-09-24 07:30 | 13.9 |
| 2020-09-24 07:40 | 14.7 |
| 2020-09-24 07:50 | 15.1 |
| 2020-09-24 08:00 | 15.4 |
| 2020-09-24 08:10 | 15.9 |
| 2020-09-24 08:20 | 16.6 |
| 2020-09-24 08:30 | 16.8 |
| 2020-09-24 08:40 | 17.5 |
| 2020-09-24 08:50 | 18.3 |
| 2020-09-24 09:00 | 18.8 |
| 2020-09-24 09:10 | 19.8 |
| 2020-09-24 09:20 | 19.8 |
| 2020-09-24 09:30 | 20.9 |
| 2020-09-24 09:40 | 21.1 |
| 2020-09-24 09:50 | 22.8 |
| 2020-09-24 10:00 | 22.6 |
| 2020-09-24 10:10 | 23   |
| 2020-09-24 10:20 | 24   |
| 2020-09-24 10:30 | 23.8 |
| 2020-09-24 10:40 | 24.9 |
| 2020-09-24 10:50 | 25.4 |
| 2020-09-24 11:00 | 26.1 |
| 2020-09-24 11:10 | 27.9 |
| 2020-09-24 11:20 | 28   |
| 2020-09-24 11:30 | 27.8 |
| 2020-09-24 11:40 | 28.2 |
| 2020-09-24 11:50 | 29.1 |
| 2020-09-24 12:00 | 30.3 |
| 2020-09-24 12:10 | 28.6 |
| 2020-09-24 12:20 | 29.3 |
| 2020-09-24 12:30 | 28.8 |
| 2020-09-24 12:40 | 29.3 |
| 2020-09-24 12:50 | 29.8 |
| 2020-09-24 13:00 | 29.6 |
| 2020-09-24 13:10 | 28.9 |
| 2020-09-24 13:20 | 29.1 |



|                  |      |
|------------------|------|
| 2020-09-24 13:30 | 29.1 |
| 2020-09-24 13:40 | 29.5 |
| 2020-09-24 13:50 | 31   |
| 2020-09-24 14:00 | 30.4 |
| 2020-09-24 14:10 | 31.9 |
| 2020-09-24 14:20 | 30   |
| 2020-09-24 14:30 | 29.9 |
| 2020-09-24 14:40 | 31.6 |
| 2020-09-24 14:50 | 31.3 |
| 2020-09-24 15:00 | 31   |
| 2020-09-24 15:10 | 29.6 |
| 2020-09-24 15:20 | 29.9 |
| 2020-09-24 15:30 | 30.2 |
| 2020-09-24 15:40 | 31.8 |
| 2020-09-24 15:50 | 30.7 |
| 2020-09-24 16:00 | 31.1 |
| 2020-09-24 16:10 | 30.6 |
| 2020-09-24 16:20 | 29.4 |
| 2020-09-24 16:30 | 29.8 |
| 2020-09-24 16:40 | 29.4 |
| 2020-09-24 16:50 | 29.1 |
| 2020-09-24 17:00 | 28.8 |
| 2020-09-24 17:10 | 28.6 |
| 2020-09-24 17:20 | 28.4 |
| 2020-09-24 17:30 | 27.9 |
| 2020-09-24 17:40 | 26.2 |
| 2020-09-24 17:50 | 25.5 |
| 2020-09-24 18:00 | 24.9 |
| 2020-09-24 18:10 | 24.6 |
| 2020-09-24 18:20 | 23.9 |
| 2020-09-24 18:30 | 23.3 |
| 2020-09-24 18:40 | 22.8 |
| 2020-09-24 18:50 | 22.4 |
| 2020-09-24 19:00 | 22.1 |
| 2020-09-24 19:10 | 21.7 |
| 2020-09-24 19:20 | 21.6 |
| 2020-09-24 19:30 | 21.1 |
| 2020-09-24 19:40 | 20.7 |
| 2020-09-24 19:50 | 20.9 |
| 2020-09-24 20:00 | 21.1 |
| 2020-09-24 20:10 | 20.6 |
| 2020-09-24 20:20 | 19.7 |
| 2020-09-24 20:30 | 19.1 |
| 2020-09-24 20:40 | 19.7 |
| 2020-09-24 20:50 | 19.8 |
| 2020-09-24 21:00 | 20   |
| 2020-09-24 21:10 | 19.8 |
| 2020-09-24 21:20 | 19.8 |
| 2020-09-24 21:30 | 20.1 |
| 2020-09-24 21:40 | 19.6 |



|                  |      |
|------------------|------|
| 2020-09-24 21:50 | 19.8 |
| 2020-09-24 22:00 | 18.5 |
| 2020-09-24 22:10 | 17.9 |
| 2020-09-24 22:20 | 18.8 |
| 2020-09-24 22:30 | 19.4 |
| 2020-09-24 22:40 | 19.4 |
| 2020-09-24 22:50 | 19.6 |
| 2020-09-24 23:00 | 19.5 |
| 2020-09-24 23:10 | 19.4 |
| 2020-09-24 23:20 | 19.4 |
| 2020-09-24 23:30 | 19.1 |
| 2020-09-24 23:40 | 19.4 |
| 2020-09-24 23:50 | 19.7 |
| 2020-09-25 00:00 | 19.8 |
| 2020-09-25 00:10 | 19.4 |
| 2020-09-25 00:20 | 19.1 |
| 2020-09-25 00:30 | 18.9 |
| 2020-09-25 00:40 | 18.6 |
| 2020-09-25 00:50 | 18.1 |
| 2020-09-25 01:00 | 17.6 |
| 2020-09-25 01:10 | 17.1 |
| 2020-09-25 01:20 | 16.9 |
| 2020-09-25 01:30 | 16.7 |
| 2020-09-25 01:40 | 16.2 |
| 2020-09-25 01:50 | 15.9 |
| 2020-09-25 02:00 | 15.8 |
| 2020-09-25 02:10 | 15.8 |
| 2020-09-25 02:20 | 15.6 |
| 2020-09-25 02:30 | 15.4 |
| 2020-09-25 02:40 | 15.3 |
| 2020-09-25 02:50 | 15   |
| 2020-09-25 03:00 | 15.3 |
| 2020-09-25 03:10 | 15.1 |
| 2020-09-25 03:20 | 15   |
| 2020-09-25 03:30 | 14.8 |
| 2020-09-25 03:40 | 14.6 |
| 2020-09-25 03:50 | 14.6 |
| 2020-09-25 04:00 | 14.4 |
| 2020-09-25 04:10 | 14.2 |
| 2020-09-25 04:20 | 14.1 |
| 2020-09-25 04:30 | 14   |
| 2020-09-25 04:40 | 13.9 |
| 2020-09-25 04:50 | 13.8 |
| 2020-09-25 05:00 | 13.7 |
| 2020-09-25 05:10 | 13.4 |
| 2020-09-25 05:20 | 13.6 |
| 2020-09-25 05:30 | 13.6 |
| 2020-09-25 05:40 | 13.6 |
| 2020-09-25 05:50 | 13.6 |
| 2020-09-25 06:00 | 13.4 |



|                  |      |
|------------------|------|
| 2020-09-25 06:10 | 13.4 |
| 2020-09-25 06:20 | 13.6 |
| 2020-09-25 06:30 | 13.7 |
| 2020-09-25 06:40 | 13.8 |
| 2020-09-25 06:50 | 13.9 |
| 2020-09-25 07:00 | 14.2 |
| 2020-09-25 07:10 | 14.6 |
| 2020-09-25 07:20 | 14.8 |
| 2020-09-25 07:30 | 15.1 |
| 2020-09-25 07:40 | 15.4 |
| 2020-09-25 07:50 | 16.2 |
| 2020-09-25 08:00 | 16.6 |
| 2020-09-25 08:10 | 17.4 |
| 2020-09-25 08:20 | 17.7 |
| 2020-09-25 08:30 | 18   |
| 2020-09-25 08:40 | 18.9 |
| 2020-09-25 08:50 | 18.9 |
| 2020-09-25 09:00 | 20.1 |
| 2020-09-25 09:10 | 20.4 |
| 2020-09-25 09:20 | 21.4 |
| 2020-09-25 09:30 | 22.6 |
| 2020-09-25 09:40 | 22.9 |
| 2020-09-25 09:50 | 24.3 |
| 2020-09-25 10:00 | 24.7 |
| 2020-09-25 10:10 | 25.7 |
| 2020-09-25 10:20 | 26.4 |
| 2020-09-25 10:30 | 27.4 |
| 2020-09-25 10:40 | 26.3 |
| 2020-09-25 10:50 | 27.6 |
| 2020-09-25 11:00 | 27.4 |
| 2020-09-25 11:10 | 27.9 |
| 2020-09-25 11:20 | 28.4 |
| 2020-09-25 11:30 | 27.4 |
| 2020-09-25 11:40 | 28.5 |
| 2020-09-25 11:50 | 27.9 |
| 2020-09-25 12:00 | 29.7 |
| 2020-09-25 12:10 | 28.9 |
| 2020-09-25 12:20 | 29.4 |
| 2020-09-25 12:30 | 29.4 |
| 2020-09-25 12:40 | 28.1 |
| 2020-09-25 12:50 | 28.8 |
| 2020-09-25 13:00 | 30.1 |
| 2020-09-25 13:10 | 31.6 |
| 2020-09-25 13:20 | 30.5 |
| 2020-09-25 13:30 | 30.3 |
| 2020-09-25 13:40 | 30   |
| 2020-09-25 13:50 | 29.7 |
| 2020-09-25 14:00 | 30.8 |
| 2020-09-25 14:10 | 31.3 |
| 2020-09-25 14:20 | 30.1 |



|                  |      |
|------------------|------|
| 2020-09-25 14:30 | 31.4 |
| 2020-09-25 14:40 | 29.9 |
| 2020-09-25 14:50 | 31.1 |
| 2020-09-25 15:00 | 31.7 |
| 2020-09-25 15:10 | 32.9 |
| 2020-09-25 15:20 | 33.3 |
| 2020-09-25 15:30 | 32.3 |
| 2020-09-25 15:40 | 31.5 |
| 2020-09-25 15:50 | 30.5 |
| 2020-09-25 16:00 | 28.7 |
| 2020-09-25 16:10 | 29.1 |
| 2020-09-25 16:20 | 29.9 |
| 2020-09-25 16:30 | 31.4 |
| 2020-09-25 16:40 | 30.3 |
| 2020-09-25 16:50 | 29.9 |
| 2020-09-25 17:00 | 29.3 |
| 2020-09-25 17:10 | 29.3 |
| 2020-09-25 17:20 | 28.9 |
| 2020-09-25 17:30 | 27.7 |
| 2020-09-25 17:40 | 27.5 |
| 2020-09-25 17:50 | 26.8 |
| 2020-09-25 18:00 | 25.9 |
| 2020-09-25 18:10 | 25.4 |
| 2020-09-25 18:20 | 25   |
| 2020-09-25 18:30 | 24.7 |
| 2020-09-25 18:40 | 24.3 |
| 2020-09-25 18:50 | 24.1 |
| 2020-09-25 19:00 | 23.9 |
| 2020-09-25 19:10 | 23.6 |
| 2020-09-25 19:20 | 23.3 |
| 2020-09-25 19:30 | 23   |
| 2020-09-25 19:40 | 22.6 |
| 2020-09-25 19:50 | 22.3 |
| 2020-09-25 20:00 | 22.1 |
| 2020-09-25 20:10 | 22.2 |
| 2020-09-25 20:20 | 22.1 |
| 2020-09-25 20:30 | 22.2 |
| 2020-09-25 20:40 | 22   |
| 2020-09-25 20:50 | 21.8 |
| 2020-09-25 21:00 | 21.6 |
| 2020-09-25 21:10 | 21.6 |
| 2020-09-25 21:20 | 21.3 |
| 2020-09-25 21:30 | 20.8 |
| 2020-09-25 21:40 | 20.7 |
| 2020-09-25 21:50 | 21   |
| 2020-09-25 22:00 | 20.9 |
| 2020-09-25 22:10 | 21.1 |
| 2020-09-25 22:20 | 21.1 |
| 2020-09-25 22:30 | 20.9 |
| 2020-09-25 22:40 | 20.8 |



|                  |      |
|------------------|------|
| 2020-09-25 22:50 | 20.8 |
| 2020-09-25 23:00 | 20.5 |
| 2020-09-25 23:10 | 20.3 |
| 2020-09-25 23:20 | 19.6 |
| 2020-09-25 23:30 | 18.9 |
| 2020-09-25 23:40 | 18.9 |
| 2020-09-25 23:50 | 18.9 |
| 2020-09-26 00:00 | 18.8 |
| 2020-09-26 00:10 | 18.6 |
| 2020-09-26 00:20 | 18.7 |
| 2020-09-26 00:30 | 18.9 |
| 2020-09-26 00:40 | 19.4 |
| 2020-09-26 00:50 | 19.4 |
| 2020-09-26 01:00 | 19.6 |
| 2020-09-26 01:10 | 19   |
| 2020-09-26 01:20 | 18.8 |
| 2020-09-26 01:30 | 18.9 |
| 2020-09-26 01:40 | 20.1 |
| 2020-09-26 01:50 | 20.7 |
| 2020-09-26 02:00 | 20.7 |
| 2020-09-26 02:10 | 20.8 |
| 2020-09-26 02:20 | 20.4 |
| 2020-09-26 02:30 | 20.4 |
| 2020-09-26 02:40 | 20.3 |
| 2020-09-26 02:50 | 20   |
| 2020-09-26 03:00 | 19.8 |
| 2020-09-26 03:10 | 19.7 |
| 2020-09-26 03:20 | 19.9 |
| 2020-09-26 03:30 | 20.1 |
| 2020-09-26 03:40 | 19.9 |
| 2020-09-26 03:50 | 19.9 |
| 2020-09-26 04:00 | 19.7 |
| 2020-09-26 04:10 | 19.3 |
| 2020-09-26 04:20 | 18   |
| 2020-09-26 04:30 | 17.4 |
| 2020-09-26 04:40 | 17.6 |
| 2020-09-26 04:50 | 17.3 |
| 2020-09-26 05:00 | 17.7 |
| 2020-09-26 05:10 | 16.9 |
| 2020-09-26 05:20 | 16.8 |
| 2020-09-26 05:30 | 17.1 |
| 2020-09-26 05:40 | 16.7 |
| 2020-09-26 05:50 | 16   |
| 2020-09-26 06:00 | 16   |
| 2020-09-26 06:10 | 16   |
| 2020-09-26 06:20 | 16.1 |
| 2020-09-26 06:30 | 16.1 |
| 2020-09-26 06:40 | 16.1 |
| 2020-09-26 06:50 | 17.7 |
| 2020-09-26 07:00 | 18.8 |



|                  |      |
|------------------|------|
| 2020-09-26 07:10 | 18.8 |
| 2020-09-26 07:20 | 18.7 |
| 2020-09-26 07:30 | 19.3 |
| 2020-09-26 07:40 | 19.9 |
| 2020-09-26 07:50 | 20.5 |
| 2020-09-26 08:00 | 21   |
| 2020-09-26 08:10 | 21.4 |
| 2020-09-26 08:20 | 22.5 |
| 2020-09-26 08:30 | 23.3 |
| 2020-09-26 08:40 | 23.8 |
| 2020-09-26 08:50 | 23.6 |
| 2020-09-26 09:00 | 23.4 |
| 2020-09-26 09:10 | 23.4 |
| 2020-09-26 09:20 | 24.1 |
| 2020-09-26 09:30 | 24.6 |
| 2020-09-26 09:40 | 24.6 |
| 2020-09-26 09:50 | 25.1 |
| 2020-09-26 10:00 | 25.3 |
| 2020-09-26 10:10 | 26.3 |
| 2020-09-26 10:20 | 27.3 |
| 2020-09-26 10:30 | 27.3 |
| 2020-09-26 10:40 | 28.9 |
| 2020-09-26 10:50 | 28.8 |
| 2020-09-26 11:00 | 29.3 |
| 2020-09-26 11:10 | 29.6 |
| 2020-09-26 11:20 | 30.4 |
| 2020-09-26 11:30 | 30.8 |
| 2020-09-26 11:40 | 30.8 |
| 2020-09-26 11:50 | 31.4 |
| 2020-09-26 12:00 | 32.2 |
| 2020-09-26 12:10 | 32.3 |
| 2020-09-26 12:20 | 32   |
| 2020-09-26 12:30 | 32.2 |
| 2020-09-26 12:40 | 33.5 |
| 2020-09-26 12:50 | 33.7 |
| 2020-09-26 13:00 | 35   |
| 2020-09-26 13:10 | 33.9 |
| 2020-09-26 13:20 | 34.5 |
| 2020-09-26 13:30 | 34.4 |
| 2020-09-26 13:40 | 33.5 |
| 2020-09-26 13:50 | 34.1 |
| 2020-09-26 14:00 | 33.6 |
| 2020-09-26 14:10 | 33.6 |
| 2020-09-26 14:20 | 33.6 |
| 2020-09-26 14:30 | 33.9 |
| 2020-09-26 14:40 | 33.9 |
| 2020-09-26 14:50 | 33.3 |
| 2020-09-26 15:00 | 33.8 |
| 2020-09-26 15:10 | 32.8 |
| 2020-09-26 15:20 | 32.7 |



|                  |      |
|------------------|------|
| 2020-09-26 15:30 | 33.1 |
| 2020-09-26 15:40 | 32.1 |
| 2020-09-26 15:50 | 32.4 |
| 2020-09-26 16:00 | 33.4 |
| 2020-09-26 16:10 | 33.2 |
| 2020-09-26 16:20 | 34.1 |
| 2020-09-26 16:30 | 33.5 |
| 2020-09-26 16:40 | 33.3 |
| 2020-09-26 16:50 | 32.8 |
| 2020-09-26 17:00 | 32.2 |
| 2020-09-26 17:10 | 32.4 |
| 2020-09-26 17:20 | 32.3 |
| 2020-09-26 17:40 | 31.8 |
| 2020-09-26 17:50 | 31.4 |
| 2020-09-26 18:00 | 30.8 |
| 2020-09-26 18:10 | 30.1 |
| 2020-09-26 18:20 | 29.6 |
| 2020-09-26 18:30 | 28.9 |
| 2020-09-26 18:40 | 28.4 |
| 2020-09-26 18:50 | 28.5 |
| 2020-09-26 19:00 | 28.3 |
| 2020-09-26 19:10 | 28.1 |
| 2020-09-26 19:20 | 27.9 |
| 2020-09-26 19:30 | 27.9 |
| 2020-09-26 19:40 | 27.9 |
| 2020-09-26 19:50 | 27.9 |
| 2020-09-26 20:00 | 27.7 |
| 2020-09-26 20:10 | 27.5 |
| 2020-09-26 20:20 | 27.2 |
| 2020-09-26 20:30 | 27.2 |
| 2020-09-26 20:40 | 27.2 |
| 2020-09-26 20:50 | 26.9 |
| 2020-09-26 21:00 | 27.3 |
| 2020-09-26 21:10 | 26.9 |
| 2020-09-26 21:20 | 27.2 |
| 2020-09-26 21:30 | 27.3 |
| 2020-09-26 21:40 | 27.3 |
| 2020-09-26 21:50 | 27.1 |
| 2020-09-26 22:00 | 26.9 |
| 2020-09-26 22:10 | 26.8 |
| 2020-09-26 22:20 | 26.8 |
| 2020-09-26 22:30 | 26.8 |
| 2020-09-26 22:40 | 26.6 |
| 2020-09-26 22:50 | 26.6 |
| 2020-09-26 23:00 | 26.6 |
| 2020-09-26 23:10 | 26.5 |
| 2020-09-26 23:20 | 26.3 |
| 2020-09-26 23:30 | 26.2 |
| 2020-09-26 23:40 | 26   |
| 2020-09-26 23:50 | 25.9 |



|                  |      |
|------------------|------|
| 2020-09-27 00:00 | 26.1 |
| 2020-09-27 00:10 | 25.8 |
| 2020-09-27 00:20 | 25.9 |
| 2020-09-27 00:30 | 25.6 |
| 2020-09-27 00:40 | 25.3 |
| 2020-09-27 00:50 | 25.2 |
| 2020-09-27 01:00 | 25.3 |
| 2020-09-27 01:10 | 25.2 |
| 2020-09-27 01:20 | 24.8 |
| 2020-09-27 01:30 | 24.6 |
| 2020-09-27 01:40 | 24.6 |
| 2020-09-27 01:50 | 24.4 |
| 2020-09-27 02:00 | 24.4 |
| 2020-09-27 02:10 | 24.1 |
| 2020-09-27 02:20 | 24.1 |
| 2020-09-27 02:30 | 23.9 |
| 2020-09-27 02:40 | 23.6 |
| 2020-09-27 02:50 | 23.8 |
| 2020-09-27 03:00 | 23.6 |
| 2020-09-27 03:10 | 23.6 |
| 2020-09-27 03:20 | 23.6 |
| 2020-09-27 03:30 | 23.6 |
| 2020-09-27 03:40 | 23.6 |
| 2020-09-27 03:50 | 23.5 |
| 2020-09-27 04:00 | 23.3 |
| 2020-09-27 04:10 | 23.4 |
| 2020-09-27 04:20 | 23.3 |
| 2020-09-27 04:30 | 23.4 |
| 2020-09-27 04:40 | 23.3 |
| 2020-09-27 04:50 | 23.1 |
| 2020-09-27 05:00 | 23.1 |
| 2020-09-27 05:10 | 23.1 |
| 2020-09-27 05:20 | 23.1 |
| 2020-09-27 05:30 | 23.3 |
| 2020-09-27 05:40 | 23   |
| 2020-09-27 05:50 | 23.3 |
| 2020-09-27 06:00 | 23.3 |
| 2020-09-27 06:10 | 23.4 |
| 2020-09-27 06:20 | 23.4 |
| 2020-09-27 06:30 | 23.2 |
| 2020-09-27 06:40 | 23.1 |
| 2020-09-27 06:50 | 23.3 |
| 2020-09-27 07:00 | 23.8 |
| 2020-09-27 07:10 | 24.1 |
| 2020-09-27 07:20 | 24.4 |
| 2020-09-27 07:30 | 24.4 |
| 2020-09-27 07:40 | 24.3 |
| 2020-09-27 07:50 | 24.4 |
| 2020-09-27 08:00 | 24.6 |
| 2020-09-27 08:10 | 25.1 |



|                  |      |
|------------------|------|
| 2020-09-27 08:20 | 25.1 |
| 2020-09-27 08:30 | 25.1 |
| 2020-09-27 08:40 | 25.2 |
| 2020-09-27 08:50 | 25.3 |
| 2020-09-27 09:00 | 24.9 |
| 2020-09-27 09:10 | 24.9 |
| 2020-09-27 09:20 | 25.1 |
| 2020-09-27 09:30 | 25.1 |
| 2020-09-27 09:40 | 21.4 |
| 2020-09-27 09:50 | 18.7 |
| 2020-09-27 10:00 | 18.1 |
| 2020-09-27 10:10 | 17.9 |
| 2020-09-27 10:20 | 17.8 |
| 2020-09-27 10:30 | 17.8 |
| 2020-09-27 10:40 | 17.8 |
| 2020-09-27 10:50 | 17.7 |
| 2020-09-27 11:00 | 17.8 |
| 2020-09-27 11:10 | 17.9 |
| 2020-09-27 11:20 | 18.2 |
| 2020-09-27 11:30 | 18.8 |
| 2020-09-27 11:40 | 19.1 |
| 2020-09-27 11:50 | 19.5 |
| 2020-09-27 12:00 | 20.4 |
| 2020-09-27 12:10 | 20.6 |
| 2020-09-27 12:20 | 22.9 |
| 2020-09-27 12:30 | 23.2 |
| 2020-09-27 12:40 | 23.8 |
| 2020-09-27 12:50 | 24.5 |
| 2020-09-27 13:00 | 22.9 |
| 2020-09-27 13:10 | 22.8 |
| 2020-09-27 13:20 | 24.1 |
| 2020-09-27 13:30 | 24.8 |
| 2020-09-27 13:40 | 24.7 |
| 2020-09-27 13:50 | 24.9 |
| 2020-09-27 14:00 | 26.1 |
| 2020-09-27 14:10 | 26.3 |
| 2020-09-27 14:20 | 27.4 |
| 2020-09-27 14:30 | 27.1 |
| 2020-09-27 14:40 | 28.4 |
| 2020-09-27 14:50 | 28   |
| 2020-09-27 15:00 | 28.2 |
| 2020-09-27 15:10 | 27.4 |
| 2020-09-27 15:20 | 28.2 |
| 2020-09-27 15:30 | 28.4 |
| 2020-09-27 15:40 | 27.8 |
| 2020-09-27 15:50 | 27.9 |
| 2020-09-27 16:00 | 27.6 |
| 2020-09-27 16:10 | 27.6 |
| 2020-09-27 16:20 | 28.1 |
| 2020-09-27 16:30 | 28.4 |



|                  |      |
|------------------|------|
| 2020-09-27 16:40 | 27.4 |
| 2020-09-27 16:50 | 27.6 |
| 2020-09-27 17:00 | 27.8 |
| 2020-09-27 17:10 | 27.8 |
| 2020-09-27 17:20 | 26.6 |
| 2020-09-27 17:30 | 26.3 |
| 2020-09-27 17:40 | 25.3 |
| 2020-09-27 17:50 | 24.4 |
| 2020-09-27 18:00 | 24   |
| 2020-09-27 18:10 | 23.6 |
| 2020-09-27 18:20 | 23.2 |
| 2020-09-27 18:30 | 22.5 |
| 2020-09-27 18:40 | 22.3 |
| 2020-09-27 18:50 | 22.1 |
| 2020-09-27 19:00 | 21.9 |
| 2020-09-27 19:10 | 21.8 |
| 2020-09-27 19:20 | 21.6 |
| 2020-09-27 19:30 | 21.4 |
| 2020-09-27 19:40 | 21.1 |
| 2020-09-27 19:50 | 21.2 |
| 2020-09-27 20:00 | 21.4 |
| 2020-09-27 20:10 | 21.4 |
| 2020-09-27 20:20 | 21.4 |
| 2020-09-27 20:30 | 21.6 |
| 2020-09-27 20:40 | 21.3 |
| 2020-09-27 20:50 | 21.1 |
| 2020-09-27 21:00 | 21.1 |
| 2020-09-27 21:10 | 21.3 |
| 2020-09-27 21:20 | 21.3 |
| 2020-09-27 21:30 | 21.6 |
| 2020-09-27 21:40 | 21.6 |
| 2020-09-27 21:50 | 22.1 |
| 2020-09-27 22:00 | 22   |
| 2020-09-27 22:10 | 21.3 |
| 2020-09-27 22:20 | 20.8 |
| 2020-09-27 22:30 | 19.9 |
| 2020-09-27 22:40 | 19.7 |
| 2020-09-27 22:50 | 19.6 |
| 2020-09-27 23:00 | 19.4 |
| 2020-09-27 23:10 | 19.4 |
| 2020-09-27 23:20 | 19.3 |
| 2020-09-27 23:30 | 19.3 |
| 2020-09-27 23:40 | 19.3 |
| 2020-09-27 23:50 | 19.2 |
| 2020-09-28 00:00 | 19.1 |
| 2020-09-28 00:10 | 19.1 |
| 2020-09-28 00:20 | 19.1 |
| 2020-09-28 00:30 | 19   |
| 2020-09-28 00:40 | 18.9 |
| 2020-09-28 00:50 | 18.8 |



|                  |      |
|------------------|------|
| 2020-09-28 01:00 | 18.5 |
| 2020-09-28 01:10 | 18.4 |
| 2020-09-28 01:20 | 18   |
| 2020-09-28 01:30 | 17.6 |
| 2020-09-28 01:40 | 17.4 |
| 2020-09-28 01:50 | 17.2 |
| 2020-09-28 02:00 | 16.6 |
| 2020-09-28 02:10 | 16.4 |
| 2020-09-28 02:20 | 16.1 |
| 2020-09-28 02:30 | 15.8 |
| 2020-09-28 02:40 | 15.6 |
| 2020-09-28 02:50 | 15.6 |
| 2020-09-28 03:00 | 15.5 |
| 2020-09-28 03:10 | 15.5 |
| 2020-09-28 03:20 | 15.5 |
| 2020-09-28 03:30 | 15.6 |
| 2020-09-28 03:40 | 15.5 |
| 2020-09-28 03:50 | 15.6 |
| 2020-09-28 04:00 | 15.5 |
| 2020-09-28 04:10 | 15.5 |
| 2020-09-28 04:20 | 15.4 |
| 2020-09-28 04:30 | 15.4 |
| 2020-09-28 04:40 | 15.4 |
| 2020-09-28 04:50 | 15.4 |
| 2020-09-28 05:00 | 15.5 |
| 2020-09-28 05:10 | 15.6 |
| 2020-09-28 05:20 | 15.6 |
| 2020-09-28 05:30 | 15.3 |
| 2020-09-28 05:40 | 14.8 |
| 2020-09-28 05:50 | 14.4 |
| 2020-09-28 06:00 | 13.8 |
| 2020-09-28 06:10 | 13.3 |
| 2020-09-28 06:20 | 12   |
| 2020-09-28 06:30 | 11.6 |
| 2020-09-28 06:40 | 11.7 |
| 2020-09-28 06:50 | 11.6 |
| 2020-09-28 07:00 | 11.6 |
| 2020-09-28 07:10 | 12.1 |
| 2020-09-28 07:20 | 12.1 |
| 2020-09-28 07:30 | 12.4 |
| 2020-09-28 07:40 | 12.6 |
| 2020-09-28 07:50 | 12.9 |
| 2020-09-28 08:00 | 12.7 |
| 2020-09-28 08:10 | 12.8 |
| 2020-09-28 08:20 | 12.9 |
| 2020-09-28 08:30 | 13.3 |
| 2020-09-28 08:40 | 13.3 |
| 2020-09-28 08:50 | 13.1 |
| 2020-09-28 09:00 | 13.1 |
| 2020-09-28 09:10 | 13.3 |



|                  |      |
|------------------|------|
| 2020-09-28 09:20 | 13.4 |
| 2020-09-28 09:30 | 13.8 |
| 2020-09-28 09:40 | 13.7 |
| 2020-09-28 09:50 | 14.6 |
| 2020-09-28 10:00 | 14.4 |
| 2020-09-28 10:10 | 16.2 |
| 2020-09-28 10:20 | 16.3 |
| 2020-09-28 10:30 | 17.6 |
| 2020-09-28 10:40 | 16.8 |
| 2020-09-28 10:50 | 16.8 |
| 2020-09-28 11:00 | 18.2 |
| 2020-09-28 11:10 | 18.1 |
| 2020-09-28 11:20 | 17.6 |
| 2020-09-28 11:30 | 18.6 |
| 2020-09-28 11:40 | 18.9 |
| 2020-09-28 11:50 | 19.4 |
| 2020-09-28 12:00 | 19.2 |
| 2020-09-28 12:10 | 20.3 |
| 2020-09-28 12:20 | 20.1 |
| 2020-09-28 12:30 | 19.3 |
| 2020-09-28 12:40 | 20.7 |
| 2020-09-28 12:50 | 20.4 |
| 2020-09-28 13:00 | 21.9 |
| 2020-09-28 13:10 | 21.2 |
| 2020-09-28 13:20 | 21.1 |
| 2020-09-28 13:30 | 21.1 |
| 2020-09-28 13:40 | 23.3 |
| 2020-09-28 13:50 | 22.6 |
| 2020-09-28 14:00 | 22.9 |
| 2020-09-28 14:10 | 22.8 |
| 2020-09-28 14:20 | 22.9 |
| 2020-09-28 14:30 | 23.8 |
| 2020-09-28 14:40 | 22.6 |
| 2020-09-28 14:50 | 23.1 |
| 2020-09-28 15:00 | 23.8 |
| 2020-09-28 15:10 | 22.6 |
| 2020-09-28 15:20 | 23.1 |
| 2020-09-28 15:30 | 22.8 |
| 2020-09-28 15:40 | 21.7 |
| 2020-09-28 15:50 | 23.3 |
| 2020-09-28 16:00 | 21.8 |
| 2020-09-28 16:10 | 22.8 |
| 2020-09-28 16:20 | 22.8 |
| 2020-09-28 16:30 | 22.2 |
| 2020-09-28 16:40 | 22.4 |
| 2020-09-28 16:50 | 22.1 |
| 2020-09-28 17:00 | 22.3 |
| 2020-09-28 17:10 | 21.2 |
| 2020-09-28 17:20 | 21.5 |
| 2020-09-28 17:30 | 21.4 |



|                  |      |
|------------------|------|
| 2020-09-28 17:40 | 21.4 |
| 2020-09-28 17:50 | 20.7 |
| 2020-09-28 18:00 | 20.6 |
| 2020-09-28 18:10 | 19.8 |
| 2020-09-28 18:20 | 18.6 |
| 2020-09-28 18:30 | 17.8 |
| 2020-09-28 18:40 | 17.2 |
| 2020-09-28 18:50 | 16.6 |
| 2020-09-28 19:00 | 16.3 |
| 2020-09-28 19:10 | 15.7 |
| 2020-09-28 19:20 | 15.3 |
| 2020-09-28 19:30 | 15.5 |
| 2020-09-28 19:40 | 15.1 |
| 2020-09-28 19:50 | 15.1 |
| 2020-09-28 20:00 | 14.9 |
| 2020-09-28 20:10 | 14.9 |
| 2020-09-28 20:20 | 14.6 |
| 2020-09-28 20:30 | 14.4 |
| 2020-09-28 20:40 | 14.5 |
| 2020-09-28 20:50 | 14.5 |
| 2020-09-28 21:00 | 14.4 |
| 2020-09-28 21:10 | 14.1 |
| 2020-09-28 21:20 | 13.8 |
| 2020-09-28 21:30 | 13.6 |
| 2020-09-28 21:40 | 13.6 |
| 2020-09-28 21:50 | 13.4 |
| 2020-09-28 22:00 | 13.3 |
| 2020-09-28 22:10 | 13.1 |
| 2020-09-28 22:20 | 13.1 |
| 2020-09-28 22:30 | 13.1 |
| 2020-09-28 22:40 | 12.9 |
| 2020-09-28 22:50 | 12.9 |
| 2020-09-28 23:00 | 12.9 |
| 2020-09-28 23:10 | 12.6 |
| 2020-09-28 23:20 | 12.6 |
| 2020-09-28 23:30 | 12.4 |
| 2020-09-28 23:40 | 12.3 |
| 2020-09-28 23:50 | 12.2 |
| 2020-09-29 00:00 | 12.3 |
| 2020-09-29 00:10 | 12.4 |
| 2020-09-29 00:20 | 12.1 |
| 2020-09-29 00:30 | 11.9 |
| 2020-09-29 00:40 | 11.7 |
| 2020-09-29 00:50 | 11.5 |
| 2020-09-29 01:00 | 11.4 |
| 2020-09-29 01:10 | 11.3 |
| 2020-09-29 01:20 | 11.3 |
| 2020-09-29 01:30 | 11.2 |
| 2020-09-29 01:40 | 11.4 |
| 2020-09-29 01:50 | 11.3 |



|                  |      |
|------------------|------|
| 2020-09-29 02:00 | 11   |
| 2020-09-29 02:10 | 11.2 |
| 2020-09-29 02:20 | 11.3 |
| 2020-09-29 02:30 | 11.4 |
| 2020-09-29 02:40 | 11.4 |
| 2020-09-29 02:50 | 11.4 |
| 2020-09-29 03:00 | 11.4 |
| 2020-09-29 03:10 | 11.3 |
| 2020-09-29 03:20 | 11.2 |
| 2020-09-29 03:30 | 11.3 |
| 2020-09-29 03:40 | 11.3 |
| 2020-09-29 03:50 | 11.4 |
| 2020-09-29 04:00 | 11.3 |
| 2020-09-29 04:10 | 11.3 |
| 2020-09-29 04:20 | 11.3 |
| 2020-09-29 04:30 | 11.2 |
| 2020-09-29 04:40 | 11.1 |
| 2020-09-29 04:50 | 11.1 |
| 2020-09-29 05:00 | 11.1 |
| 2020-09-29 05:10 | 10.9 |
| 2020-09-29 05:20 | 10.8 |
| 2020-09-29 05:30 | 10.7 |
| 2020-09-29 05:40 | 10.6 |
| 2020-09-29 05:50 | 10.4 |
| 2020-09-29 06:00 | 10.4 |
| 2020-09-29 06:10 | 10.3 |
| 2020-09-29 06:20 | 10.4 |
| 2020-09-29 06:30 | 10.4 |
| 2020-09-29 06:40 | 10.4 |
| 2020-09-29 06:50 | 10.6 |
| 2020-09-29 07:00 | 10.8 |
| 2020-09-29 07:10 | 11.4 |
| 2020-09-29 07:20 | 12.2 |
| 2020-09-29 07:30 | 12.6 |
| 2020-09-29 07:40 | 13.1 |
| 2020-09-29 07:50 | 13.7 |
| 2020-09-29 08:00 | 14.6 |
| 2020-09-29 08:10 | 14.6 |
| 2020-09-29 08:20 | 14.6 |
| 2020-09-29 08:30 | 15.1 |
| 2020-09-29 08:40 | 15.4 |
| 2020-09-29 08:50 | 15.7 |
| 2020-09-29 09:00 | 16.1 |
| 2020-09-29 09:10 | 16.7 |
| 2020-09-29 09:20 | 17.7 |
| 2020-09-29 09:30 | 18.3 |
| 2020-09-29 09:40 | 19.1 |
| 2020-09-29 09:50 | 20.2 |
| 2020-09-29 10:00 | 21.4 |
| 2020-09-29 10:10 | 22.5 |



|                  |      |
|------------------|------|
| 2020-09-29 10:20 | 21.6 |
| 2020-09-29 10:30 | 22.9 |
| 2020-09-29 10:40 | 22.9 |
| 2020-09-29 10:50 | 24.2 |
| 2020-09-29 11:00 | 24.8 |
| 2020-09-29 11:10 | 24.8 |
| 2020-09-29 11:20 | 26.4 |
| 2020-09-29 11:30 | 25.8 |
| 2020-09-29 11:40 | 25.6 |
| 2020-09-29 11:50 | 27.6 |
| 2020-09-29 12:00 | 27.3 |
| 2020-09-29 12:10 | 27.9 |
| 2020-09-29 12:20 | 27.4 |
| 2020-09-29 12:30 | 26.9 |
| 2020-09-29 12:40 | 27.9 |
| 2020-09-29 12:50 | 29.1 |
| 2020-09-29 13:00 | 29.2 |
| 2020-09-29 13:10 | 28.1 |
| 2020-09-29 13:20 | 30   |
| 2020-09-29 13:30 | 30.4 |
| 2020-09-29 13:40 | 29.9 |
| 2020-09-29 13:50 | 30.7 |
| 2020-09-29 14:00 | 30.8 |
| 2020-09-29 14:10 | 30.7 |
| 2020-09-29 14:20 | 30.9 |
| 2020-09-29 14:30 | 31.3 |
| 2020-09-29 14:40 | 31.3 |
| 2020-09-29 14:50 | 31.4 |
| 2020-09-29 15:00 | 31.5 |
| 2020-09-29 15:10 | 30.9 |
| 2020-09-29 15:20 | 31.9 |
| 2020-09-29 15:30 | 31.4 |
| 2020-09-29 15:40 | 31.6 |
| 2020-09-29 15:50 | 30.8 |
| 2020-09-29 16:00 | 30.9 |
| 2020-09-29 16:10 | 31.1 |
| 2020-09-29 16:20 | 31.8 |
| 2020-09-29 16:30 | 30.5 |
| 2020-09-29 16:40 | 31   |
| 2020-09-29 16:50 | 30.9 |
| 2020-09-29 17:00 | 31.3 |
| 2020-09-29 17:10 | 30.6 |
| 2020-09-29 17:20 | 30.7 |
| 2020-09-29 17:30 | 29.6 |
| 2020-09-29 17:40 | 29.5 |
| 2020-09-29 17:50 | 28.8 |
| 2020-09-29 18:00 | 27.9 |
| 2020-09-29 18:10 | 27.6 |
| 2020-09-29 18:20 | 27.2 |
| 2020-09-29 18:30 | 26.8 |



|                  |      |
|------------------|------|
| 2020-09-29 18:40 | 26.6 |
| 2020-09-29 18:50 | 26.1 |
| 2020-09-29 19:00 | 25.6 |
| 2020-09-29 19:10 | 25.5 |
| 2020-09-29 19:20 | 25.4 |
| 2020-09-29 19:30 | 25.1 |
| 2020-09-29 19:40 | 24.9 |
| 2020-09-29 19:50 | 24.5 |
| 2020-09-29 20:00 | 23.8 |
| 2020-09-29 20:10 | 23.4 |
| 2020-09-29 20:20 | 23.3 |
| 2020-09-29 20:30 | 22.9 |
| 2020-09-29 20:40 | 22.8 |
| 2020-09-29 20:50 | 23   |
| 2020-09-29 21:00 | 22.9 |
| 2020-09-29 21:10 | 22.6 |
| 2020-09-29 21:20 | 22.6 |
| 2020-09-29 21:30 | 23.3 |
| 2020-09-29 21:40 | 23.6 |
| 2020-09-29 21:50 | 23.4 |
| 2020-09-29 22:00 | 22.9 |
| 2020-09-29 22:10 | 22.8 |
| 2020-09-29 22:20 | 22.6 |
| 2020-09-29 22:30 | 22.3 |
| 2020-09-29 22:40 | 21.9 |
| 2020-09-29 22:50 | 21.7 |
| 2020-09-29 23:00 | 21.4 |
| 2020-09-29 23:10 | 21.3 |
| 2020-09-29 23:20 | 21.3 |
| 2020-09-29 23:30 | 21.1 |
| 2020-09-29 23:40 | 21   |
| 2020-09-29 23:50 | 20.9 |
| 2020-09-30 00:00 | 20.8 |
| 2020-09-30 00:10 | 20.8 |
| 2020-09-30 00:20 | 20.6 |
| 2020-09-30 00:30 | 20.5 |
| 2020-09-30 00:40 | 20.4 |
| 2020-09-30 00:50 | 20.3 |
| 2020-09-30 01:00 | 20.2 |
| 2020-09-30 01:10 | 20.1 |
| 2020-09-30 01:20 | 20.1 |
| 2020-09-30 01:30 | 20.1 |
| 2020-09-30 01:40 | 20   |
| 2020-09-30 01:50 | 19.9 |
| 2020-09-30 02:00 | 19.9 |
| 2020-09-30 02:10 | 19.9 |
| 2020-09-30 02:20 | 19.8 |
| 2020-09-30 02:30 | 19.8 |
| 2020-09-30 02:40 | 19.7 |
| 2020-09-30 02:50 | 19.7 |



|                  |      |
|------------------|------|
| 2020-09-30 03:00 | 19.6 |
| 2020-09-30 03:10 | 19.5 |
| 2020-09-30 03:20 | 19.4 |
| 2020-09-30 03:30 | 19.4 |
| 2020-09-30 03:40 | 19.3 |
| 2020-09-30 03:50 | 19.3 |
| 2020-09-30 04:00 | 19.3 |
| 2020-09-30 04:10 | 19.3 |
| 2020-09-30 04:20 | 19.3 |
| 2020-09-30 04:30 | 19.2 |
| 2020-09-30 04:40 | 19.2 |
| 2020-09-30 04:50 | 19.1 |
| 2020-09-30 05:00 | 19.1 |
| 2020-09-30 05:10 | 19.1 |
| 2020-09-30 05:20 | 19.1 |
| 2020-09-30 05:30 | 18.9 |
| 2020-09-30 05:40 | 18.9 |
| 2020-09-30 05:50 | 18.9 |
| 2020-09-30 06:00 | 18.8 |
| 2020-09-30 06:10 | 18.8 |
| 2020-09-30 06:20 | 18.8 |
| 2020-09-30 06:30 | 18.8 |
| 2020-09-30 06:40 | 18.8 |
| 2020-09-30 06:50 | 18.9 |
| 2020-09-30 07:00 | 19.4 |
| 2020-09-30 07:10 | 20.7 |
| 2020-09-30 07:20 | 21.9 |
| 2020-09-30 07:30 | 22.6 |
| 2020-09-30 07:40 | 23.4 |
| 2020-09-30 07:50 | 23.8 |
| 2020-09-30 08:00 | 24.1 |
| 2020-09-30 08:10 | 24.2 |
| 2020-09-30 08:20 | 24.4 |
| 2020-09-30 08:30 | 24.3 |
| 2020-09-30 08:40 | 24.6 |
| 2020-09-30 08:50 | 24.8 |
| 2020-09-30 09:00 | 25.8 |
| 2020-09-30 09:10 | 26.3 |
| 2020-09-30 09:20 | 26.8 |
| 2020-09-30 09:30 | 28.1 |
| 2020-09-30 09:40 | 27.9 |
| 2020-09-30 09:50 | 28.3 |
| 2020-09-30 10:00 | 28.6 |
| 2020-09-30 10:10 | 29.7 |
| 2020-09-30 10:20 | 29.8 |
| 2020-09-30 10:30 | 30.2 |
| 2020-09-30 10:30 | 30.4 |
| 2020-09-30 10:40 | 31.3 |
| 2020-09-30 10:50 | 32.6 |
| 2020-09-30 11:00 | 31.9 |



|                  |      |
|------------------|------|
| 2020-09-30 11:10 | 31.9 |
| 2020-09-30 11:10 | 31.8 |
| 2020-09-30 11:20 | 31.8 |
| 2020-09-30 11:30 | 32.6 |
| 2020-09-30 11:40 | 32.4 |
| 2020-09-30 11:50 | 32.3 |
| 2020-09-30 12:10 | 33.4 |
| 2020-09-30 12:20 | 34.1 |
| 2020-09-30 12:30 | 33.9 |
| 2020-09-30 12:40 | 33.9 |
| 2020-09-30 12:50 | 34.5 |
| 2020-09-30 13:00 | 34.4 |
| 2020-09-30 13:10 | 35.5 |
| 2020-09-30 13:20 | 34.6 |
| 2020-09-30 13:30 | 34.9 |
| 2020-09-30 13:40 | 35.3 |
| 2020-09-30 13:50 | 35.7 |
| 2020-09-30 14:00 | 35.2 |
| 2020-09-30 14:10 | 34.9 |
| 2020-09-30 14:20 | 35.1 |
| 2020-09-30 14:30 | 35.6 |
| 2020-09-30 14:40 | 35   |
| 2020-09-30 14:50 | 35.7 |
| 2020-09-30 15:00 | 35.9 |
| 2020-09-30 15:10 | 36.6 |
| 2020-09-30 15:20 | 35.8 |
| 2020-09-30 15:30 | 35.4 |
| 2020-09-30 15:40 | 35.3 |
| 2020-09-30 15:50 | 35.1 |
| 2020-09-30 16:00 | 35.1 |
| 2020-09-30 16:10 | 35.1 |
| 2020-09-30 16:20 | 35.8 |
| 2020-09-30 16:40 | 35.1 |
| 2020-09-30 16:50 | 34.9 |
| 2020-09-30 17:00 | 34.5 |
| 2020-09-30 17:10 | 34.4 |
| 2020-09-30 17:20 | 33.9 |
| 2020-09-30 17:30 | 34.2 |
| 2020-09-30 17:40 | 33.6 |
| 2020-09-30 17:50 | 33.1 |
| 2020-09-30 18:00 | 32.7 |
| 2020-09-30 18:10 | 32.2 |
| 2020-09-30 18:20 | 31.4 |
| 2020-09-30 18:30 | 30.9 |
| 2020-09-30 18:40 | 30.6 |
| 2020-09-30 18:50 | 30.4 |
| 2020-09-30 19:00 | 30.3 |
| 2020-09-30 19:10 | 30.1 |
| 2020-09-30 19:20 | 30.1 |
| 2020-09-30 19:30 | 30   |



|                  |      |
|------------------|------|
| 2020-09-30 19:40 | 29.9 |
| 2020-09-30 19:50 | 29.6 |
| 2020-09-30 20:00 | 29.3 |
| 2020-09-30 20:10 | 29.6 |
| 2020-09-30 20:20 | 29.9 |
| 2020-09-30 20:30 | 29.8 |
| 2020-09-30 20:40 | 29.6 |
| 2020-09-30 20:50 | 29.5 |
| 2020-09-30 21:00 | 29.6 |
| 2020-09-30 21:10 | 29.5 |
| 2020-09-30 21:20 | 29.4 |
| 2020-09-30 21:30 | 28.3 |
| 2020-09-30 21:40 | 28.3 |
| 2020-09-30 21:50 | 27.4 |
| 2020-09-30 22:00 | 26.3 |
| 2020-09-30 22:10 | 25.5 |
| 2020-09-30 22:20 | 25   |
| 2020-09-30 22:30 | 24.6 |
| 2020-09-30 22:40 | 24.4 |
| 2020-09-30 22:50 | 24.1 |
| 2020-09-30 23:00 | 23.8 |
| 2020-09-30 23:10 | 23.4 |
| 2020-09-30 23:20 | 23.1 |
| 2020-09-30 23:30 | 22.9 |
| 2020-09-30 23:40 | 22.7 |
| 2020-09-30 23:50 | 22.5 |
| 2020-10-01 00:00 | 22.3 |
| 2020-10-01 00:10 | 22.1 |
| 2020-10-01 00:20 | 21.9 |
| 2020-10-01 00:30 | 21.8 |
| 2020-10-01 00:40 | 21.7 |
| 2020-10-01 00:50 | 21.6 |
| 2020-10-01 01:00 | 21.4 |
| 2020-10-01 01:10 | 21.4 |
| 2020-10-01 01:20 | 21.3 |
| 2020-10-01 01:30 | 21.1 |
| 2020-10-01 01:40 | 21   |
| 2020-10-01 01:50 | 20.8 |
| 2020-10-01 02:00 | 20.6 |
| 2020-10-01 02:10 | 20.5 |
| 2020-10-01 02:20 | 20.4 |
| 2020-10-01 02:30 | 20.4 |
| 2020-10-01 02:40 | 20.3 |
| 2020-10-01 02:50 | 20.2 |
| 2020-10-01 03:00 | 20.1 |
| 2020-10-01 03:10 | 20   |
| 2020-10-01 03:20 | 19.9 |
| 2020-10-01 03:30 | 19.8 |
| 2020-10-01 03:40 | 19.7 |
| 2020-10-01 03:50 | 19.4 |



|                  |      |
|------------------|------|
| 2020-10-01 04:00 | 19.4 |
| 2020-10-01 04:10 | 19.3 |
| 2020-10-01 04:20 | 19.3 |
| 2020-10-01 04:30 | 19.2 |
| 2020-10-01 04:40 | 19.1 |
| 2020-10-01 04:50 | 18.9 |
| 2020-10-01 05:00 | 18.7 |
| 2020-10-01 05:10 | 18.6 |
| 2020-10-01 05:20 | 18.6 |
| 2020-10-01 05:30 | 18.6 |
| 2020-10-01 05:40 | 18.6 |
| 2020-10-01 05:50 | 18.4 |
| 2020-10-01 06:00 | 18.4 |
| 2020-10-01 06:10 | 18.4 |
| 2020-10-01 06:20 | 18.4 |
| 2020-10-01 06:30 | 18.4 |
| 2020-10-01 06:40 | 18.6 |
| 2020-10-01 06:50 | 18.8 |
| 2020-10-01 07:00 | 19.1 |
| 2020-10-01 07:10 | 19.8 |
| 2020-10-01 07:20 | 20.4 |
| 2020-10-01 07:30 | 20.9 |
| 2020-10-01 07:40 | 21.3 |
| 2020-10-01 07:50 | 21.6 |
| 2020-10-01 08:00 | 22.1 |
| 2020-10-01 08:10 | 22.4 |
| 2020-10-01 08:20 | 23.4 |
| 2020-10-01 08:30 | 23.8 |
| 2020-10-01 08:40 | 24.3 |
| 2020-10-01 08:50 | 24.9 |
| 2020-10-01 09:00 | 26.3 |
| 2020-10-01 09:10 | 26.6 |
| 2020-10-01 09:20 | 26.8 |
| 2020-10-01 09:30 | 26.9 |
| 2020-10-01 09:40 | 26.4 |
| 2020-10-01 09:50 | 27.8 |
| 2020-10-01 10:00 | 27.8 |
| 2020-10-01 10:10 | 28.3 |
| 2020-10-01 10:20 | 28.1 |
| 2020-10-01 10:30 | 28.6 |
| 2020-10-01 10:40 | 29.3 |
| 2020-10-01 10:50 | 30.2 |
| 2020-10-01 11:00 | 30.9 |
| 2020-10-01 11:10 | 32.2 |
| 2020-10-01 11:20 | 30.9 |
| 2020-10-01 11:30 | 33.4 |
| 2020-10-01 11:40 | 32.2 |
| 2020-10-01 11:50 | 32.3 |
| 2020-10-01 12:00 | 33.5 |
| 2020-10-01 12:10 | 33.3 |



|                  |      |
|------------------|------|
| 2020-10-01 12:20 | 33.3 |
| 2020-10-01 12:30 | 32.8 |
| 2020-10-01 12:40 | 33.7 |
| 2020-10-01 12:50 | 34.6 |
| 2020-10-01 13:00 | 35.2 |
| 2020-10-01 13:10 | 34.6 |
| 2020-10-01 13:20 | 33.6 |
| 2020-10-01 13:30 | 33.8 |
| 2020-10-01 13:40 | 34.3 |
| 2020-10-01 13:50 | 35.1 |
| 2020-10-01 14:00 | 35.5 |
| 2020-10-01 14:10 | 35.2 |
| 2020-10-01 14:20 | 35.4 |
| 2020-10-01 14:30 | 35.7 |
| 2020-10-01 14:40 | 35.2 |
| 2020-10-01 14:50 | 35.3 |
| 2020-10-01 15:00 | 35.4 |
| 2020-10-01 15:10 | 35.4 |
| 2020-10-01 15:20 | 35.9 |
| 2020-10-01 15:30 | 36.1 |
| 2020-10-01 15:40 | 35.7 |
| 2020-10-01 15:50 | 35.7 |
| 2020-10-01 16:00 | 36.1 |
| 2020-10-01 16:10 | 35.3 |
| 2020-10-01 16:20 | 35.3 |
| 2020-10-01 16:30 | 35.2 |
| 2020-10-01 16:40 | 34.6 |
| 2020-10-01 16:50 | 35   |
| 2020-10-01 17:00 | 34.8 |
| 2020-10-01 17:10 | 34.8 |
| 2020-10-01 17:20 | 34.2 |
| 2020-10-01 17:30 | 33.9 |
| 2020-10-01 17:40 | 33.5 |
| 2020-10-01 17:50 | 32.8 |
| 2020-10-01 18:00 | 32.4 |
| 2020-10-01 18:10 | 31.9 |
| 2020-10-01 18:20 | 31.3 |
| 2020-10-01 18:30 | 30.7 |
| 2020-10-01 18:40 | 30.3 |
| 2020-10-01 18:50 | 29.8 |
| 2020-10-01 19:00 | 29.6 |
| 2020-10-01 19:10 | 29.4 |
| 2020-10-01 19:20 | 29.7 |
| 2020-10-01 19:30 | 29.4 |
| 2020-10-01 19:40 | 29.3 |
| 2020-10-01 19:50 | 29.1 |
| 2020-10-01 20:00 | 28.9 |
| 2020-10-01 20:10 | 28.6 |
| 2020-10-01 20:20 | 28.8 |
| 2020-10-01 20:30 | 28.4 |



|                  |      |
|------------------|------|
| 2020-10-01 20:50 | 27.9 |
| 2020-10-01 21:00 | 27.6 |
| 2020-10-01 21:10 | 27.4 |
| 2020-10-01 21:20 | 27.7 |
| 2020-10-01 21:30 | 28.3 |
| 2020-10-01 21:40 | 28.3 |
| 2020-10-01 21:50 | 28.2 |
| 2020-10-01 22:00 | 27.6 |
| 2020-10-01 22:10 | 27.3 |
| 2020-10-01 22:20 | 27.4 |
| 2020-10-01 22:30 | 27.2 |
| 2020-10-01 22:40 | 27.4 |
| 2020-10-01 22:50 | 27.4 |
| 2020-10-01 23:00 | 27.2 |
| 2020-10-01 23:10 | 27   |
| 2020-10-01 23:20 | 26.9 |
| 2020-10-01 23:30 | 26.9 |
| 2020-10-01 23:40 | 26.9 |
| 2020-10-01 23:50 | 26.5 |
| 2020-10-02 00:00 | 26.6 |
| 2020-10-02 00:10 | 26.4 |
| 2020-10-02 00:20 | 26.4 |
| 2020-10-02 00:30 | 26.6 |
| 2020-10-02 00:40 | 26.5 |
| 2020-10-02 00:50 | 26.6 |
| 2020-10-02 01:00 | 26.6 |
| 2020-10-02 01:10 | 26.6 |
| 2020-10-02 01:20 | 26.5 |
| 2020-10-02 01:30 | 26.3 |
| 2020-10-02 01:50 | 26.1 |
| 2020-10-02 02:00 | 26   |
| 2020-10-02 02:10 | 25.8 |
| 2020-10-02 02:20 | 25.6 |
| 2020-10-02 02:30 | 25.5 |
| 2020-10-02 02:40 | 25.4 |
| 2020-10-02 02:50 | 25.6 |
| 2020-10-02 03:00 | 25.5 |
| 2020-10-02 03:10 | 25.4 |
| 2020-10-02 03:20 | 25.1 |
| 2020-10-02 03:30 | 24.9 |
| 2020-10-02 03:40 | 24.6 |
| 2020-10-02 03:50 | 24.7 |
| 2020-10-02 04:00 | 24.6 |
| 2020-10-02 04:10 | 24.4 |
| 2020-10-02 04:20 | 24.3 |
| 2020-10-02 04:30 | 24.3 |
| 2020-10-02 04:40 | 24.2 |
| 2020-10-02 04:50 | 23.9 |
| 2020-10-02 05:00 | 23.9 |
| 2020-10-02 05:10 | 24.1 |



|                  |      |
|------------------|------|
| 2020-10-02 05:20 | 24.1 |
| 2020-10-02 05:30 | 24.3 |
| 2020-10-02 05:40 | 24.2 |
| 2020-10-02 05:50 | 24.1 |
| 2020-10-02 06:00 | 24.1 |
| 2020-10-02 06:10 | 24.1 |
| 2020-10-02 06:20 | 23.6 |
| 2020-10-02 06:30 | 24.2 |
| 2020-10-02 06:40 | 24.6 |
| 2020-10-02 06:50 | 24.8 |
| 2020-10-02 07:00 | 25   |
| 2020-10-02 07:10 | 25.4 |
| 2020-10-02 07:20 | 25.8 |
| 2020-10-02 07:30 | 25.9 |
| 2020-10-02 07:40 | 26.1 |
| 2020-10-02 07:50 | 26.2 |
| 2020-10-02 08:00 | 26.3 |
| 2020-10-02 08:10 | 26.6 |
| 2020-10-02 08:20 | 26.8 |
| 2020-10-02 08:30 | 27   |
| 2020-10-02 08:40 | 27.4 |
| 2020-10-02 08:50 | 27.9 |
| 2020-10-02 09:00 | 28.3 |
| 2020-10-02 09:10 | 28.5 |
| 2020-10-02 09:20 | 28.9 |
| 2020-10-02 09:30 | 29.3 |
| 2020-10-02 09:40 | 29.8 |
| 2020-10-02 09:50 | 29.9 |
| 2020-10-02 10:00 | 30.6 |
| 2020-10-02 10:10 | 30.4 |
| 2020-10-02 10:20 | 30.9 |
| 2020-10-02 10:30 | 31.3 |
| 2020-10-02 10:40 | 31.6 |
| 2020-10-02 10:50 | 31.9 |
| 2020-10-02 11:00 | 32.1 |
| 2020-10-02 11:10 | 33   |
| 2020-10-02 11:20 | 32.6 |
| 2020-10-02 11:30 | 32.8 |
| 2020-10-02 11:40 | 33   |
| 2020-10-02 11:50 | 33.3 |
| 2020-10-02 12:00 | 33.5 |
| 2020-10-02 12:10 | 34.4 |
| 2020-10-02 12:20 | 34.9 |
| 2020-10-02 12:30 | 34.8 |
| 2020-10-02 12:40 | 35.3 |
| 2020-10-02 12:50 | 35.3 |
| 2020-10-02 13:00 | 35.1 |
| 2020-10-02 13:10 | 35.4 |
| 2020-10-02 13:20 | 35.2 |
| 2020-10-02 13:30 | 35.7 |



|                  |      |
|------------------|------|
| 2020-10-02 13:40 | 35.4 |
| 2020-10-02 13:50 | 35.3 |
| 2020-10-02 14:00 | 35   |
| 2020-10-02 14:10 | 35.1 |
| 2020-10-02 14:20 | 35.1 |
| 2020-10-02 14:30 | 35.1 |
| 2020-10-02 14:40 | 35.1 |
| 2020-10-02 14:50 | 35.6 |
| 2020-10-02 15:00 | 34.7 |
| 2020-10-02 15:10 | 34   |
| 2020-10-02 15:20 | 35   |
| 2020-10-02 15:30 | 35   |
| 2020-10-02 15:40 | 34.4 |
| 2020-10-02 15:50 | 33.8 |
| 2020-10-02 16:00 | 33.7 |
| 2020-10-02 16:10 | 33.8 |
| 2020-10-02 16:20 | 33.8 |
| 2020-10-02 16:30 | 33.8 |
| 2020-10-02 16:40 | 33.5 |
| 2020-10-02 16:50 | 33.8 |
| 2020-10-02 17:00 | 33   |
| 2020-10-02 17:10 | 33.2 |
| 2020-10-02 17:20 | 32.6 |
| 2020-10-02 17:30 | 32.4 |
| 2020-10-02 17:40 | 31.9 |
| 2020-10-02 17:50 | 31.6 |
| 2020-10-02 18:00 | 31.2 |
| 2020-10-02 18:10 | 30.8 |
| 2020-10-02 18:20 | 30.2 |
| 2020-10-02 18:30 | 29.9 |
| 2020-10-02 18:50 | 29.1 |
| 2020-10-02 19:00 | 28.8 |
| 2020-10-02 19:10 | 28.4 |
| 2020-10-02 19:20 | 28.3 |
| 2020-10-02 19:30 | 24.8 |
| 2020-10-02 19:40 | 22.9 |
| 2020-10-02 19:50 | 21.3 |
| 2020-10-02 20:00 | 20.8 |
| 2020-10-02 20:10 | 20.1 |
| 2020-10-02 20:20 | 19.9 |
| 2020-10-02 20:30 | 19.7 |
| 2020-10-02 20:40 | 19.6 |
| 2020-10-02 20:50 | 19.5 |
| 2020-10-02 21:00 | 19.4 |
| 2020-10-02 21:10 | 19.3 |
| 2020-10-02 21:20 | 19.2 |
| 2020-10-02 21:30 | 18.8 |
| 2020-10-02 21:40 | 18.4 |
| 2020-10-02 21:50 | 18.3 |
| 2020-10-02 22:00 | 18.2 |



|                  |      |
|------------------|------|
| 2020-10-02 22:10 | 18.1 |
| 2020-10-02 22:20 | 17.9 |
| 2020-10-02 22:30 | 17.4 |
| 2020-10-02 22:40 | 17.2 |
| 2020-10-02 22:50 | 17.2 |
| 2020-10-02 23:00 | 17.1 |
| 2020-10-02 23:10 | 17.2 |
| 2020-10-02 23:20 | 17.1 |
| 2020-10-02 23:30 | 16.9 |
| 2020-10-02 23:40 | 16.8 |
| 2020-10-02 23:50 | 16.6 |
| 2020-10-03 00:00 | 16.4 |
| 2020-10-03 00:10 | 16.3 |
| 2020-10-03 00:20 | 16.1 |
| 2020-10-03 00:30 | 16   |
| 2020-10-03 00:40 | 15.9 |
| 2020-10-03 00:50 | 15.8 |
| 2020-10-03 01:00 | 15.8 |
| 2020-10-03 01:10 | 15.7 |
| 2020-10-03 01:20 | 15.6 |
| 2020-10-03 01:30 | 15.6 |
| 2020-10-03 01:40 | 15.4 |
| 2020-10-03 01:50 | 15.4 |
| 2020-10-03 02:00 | 15.4 |
| 2020-10-03 02:10 | 15.3 |
| 2020-10-03 02:20 | 15.4 |
| 2020-10-03 02:30 | 15.3 |
| 2020-10-03 02:40 | 15.4 |
| 2020-10-03 02:50 | 15.4 |
| 2020-10-03 03:00 | 15.4 |
| 2020-10-03 03:10 | 15.5 |
| 2020-10-03 03:20 | 15.5 |
| 2020-10-03 03:30 | 15.5 |
| 2020-10-03 03:40 | 15.5 |
| 2020-10-03 03:50 | 15.6 |
| 2020-10-03 04:00 | 15.6 |
| 2020-10-03 04:10 | 15.6 |
| 2020-10-03 04:20 | 15.6 |
| 2020-10-03 04:30 | 15.6 |
| 2020-10-03 04:40 | 15.6 |
| 2020-10-03 04:50 | 15.6 |
| 2020-10-03 05:00 | 15.6 |
| 2020-10-03 05:10 | 15.6 |
| 2020-10-03 05:20 | 15.6 |
| 2020-10-03 05:30 | 15.6 |
| 2020-10-03 05:40 | 15.6 |
| 2020-10-03 05:50 | 15.6 |
| 2020-10-03 06:00 | 15.4 |
| 2020-10-03 06:10 | 15.3 |
| 2020-10-03 06:20 | 15.3 |



|                  |      |
|------------------|------|
| 2020-10-03 06:30 | 15.3 |
| 2020-10-03 06:40 | 15.3 |
| 2020-10-03 06:50 | 15.3 |
| 2020-10-03 07:00 | 15.5 |
| 2020-10-03 07:10 | 15.8 |
| 2020-10-03 07:20 | 16   |
| 2020-10-03 07:30 | 16.1 |
| 2020-10-03 07:40 | 16.1 |
| 2020-10-03 07:50 | 16.3 |
| 2020-10-03 08:00 | 16.4 |
| 2020-10-03 14:40 | 19.2 |
| 2020-10-03 14:50 | 18.9 |
| 2020-10-03 15:00 | 19.3 |
| 2020-10-03 15:10 | 19.6 |
| 2020-10-03 15:20 | 19.2 |
| 2020-10-03 15:30 | 19.4 |
| 2020-10-03 15:40 | 19.4 |
| 2020-10-03 15:50 | 18.7 |
| 2020-10-03 16:00 | 19.1 |
| 2020-10-03 16:10 | 18.9 |
| 2020-10-03 16:20 | 18.3 |
| 2020-10-03 16:30 | 18.1 |
| 2020-10-03 16:40 | 17.4 |
| 2020-10-03 16:50 | 16.8 |
| 2020-10-03 17:00 | 16.3 |
| 2020-10-03 17:10 | 16.5 |
| 2020-10-03 17:20 | 16.3 |
| 2020-10-03 17:30 | 16   |
| 2020-10-03 17:40 | 15.7 |
| 2020-10-03 17:50 | 15.4 |
| 2020-10-03 18:00 | 15.3 |
| 2020-10-03 18:10 | 15   |
| 2020-10-03 18:20 | 14.8 |
| 2020-10-03 18:30 | 14.8 |
| 2020-10-03 18:40 | 14.8 |
| 2020-10-03 18:50 | 14.7 |
| 2020-10-03 19:00 | 14.6 |
| 2020-10-03 19:10 | 14.6 |
| 2020-10-03 19:20 | 14.5 |
| 2020-10-03 19:30 | 14.4 |
| 2020-10-03 19:40 | 14.3 |
| 2020-10-03 19:50 | 14.3 |
| 2020-10-03 20:00 | 14.3 |
| 2020-10-03 20:10 | 14.3 |
| 2020-10-03 20:20 | 14.1 |
| 2020-10-03 20:30 | 14.1 |
| 2020-10-03 20:40 | 14.1 |
| 2020-10-03 20:50 | 14.1 |
| 2020-10-03 21:00 | 14.1 |
| 2020-10-03 21:10 | 13.9 |



|                  |      |
|------------------|------|
| 2020-10-03 21:20 | 13.9 |
| 2020-10-03 21:30 | 13.8 |
| 2020-10-03 21:40 | 13.8 |
| 2020-10-03 21:50 | 13.9 |
| 2020-10-03 22:00 | 13.9 |
| 2020-10-03 22:10 | 13.8 |
| 2020-10-03 22:20 | 13.8 |
| 2020-10-03 22:30 | 13.8 |
| 2020-10-03 22:40 | 13.9 |
| 2020-10-03 22:50 | 14   |
| 2020-10-03 23:00 | 14.1 |
| 2020-10-03 23:10 | 14.3 |
| 2020-10-03 23:20 | 14.4 |
| 2020-10-03 23:30 | 14.6 |
| 2020-10-03 23:40 | 15.1 |
| 2020-10-03 23:50 | 15.6 |
| 2020-10-04 00:00 | 15.9 |
| 2020-10-04 00:10 | 15.9 |
| 2020-10-04 00:20 | 15.9 |
| 2020-10-04 00:30 | 15.9 |
| 2020-10-04 00:40 | 15.8 |
| 2020-10-04 00:50 | 15.8 |
| 2020-10-04 01:00 | 15.8 |
| 2020-10-04 01:10 | 15.7 |
| 2020-10-04 01:20 | 15.6 |
| 2020-10-04 01:30 | 15.5 |
| 2020-10-04 01:40 | 15.4 |
| 2020-10-04 01:50 | 15.4 |
| 2020-10-04 02:00 | 15.4 |
| 2020-10-04 02:10 | 15.3 |
| 2020-10-04 02:20 | 15.3 |
| 2020-10-04 02:30 | 15.1 |
| 2020-10-04 02:40 | 15   |
| 2020-10-04 02:50 | 14.9 |
| 2020-10-04 03:00 | 14.8 |
| 2020-10-04 03:10 | 14.8 |
| 2020-10-04 03:20 | 14.7 |
| 2020-10-04 03:30 | 14.6 |
| 2020-10-04 03:40 | 14.5 |
| 2020-10-04 03:50 | 14.4 |
| 2020-10-04 04:00 | 14.4 |
| 2020-10-04 04:10 | 14.3 |
| 2020-10-04 04:20 | 14.3 |
| 2020-10-04 04:30 | 14.3 |
| 2020-10-04 04:40 | 14.2 |
| 2020-10-04 04:50 | 14.1 |
| 2020-10-04 05:00 | 14.1 |
| 2020-10-04 05:10 | 14   |
| 2020-10-04 05:20 | 13.9 |
| 2020-10-04 05:30 | 13.9 |



|                  |      |
|------------------|------|
| 2020-10-04 05:40 | 14   |
| 2020-10-04 05:50 | 14   |
| 2020-10-04 06:00 | 14   |
| 2020-10-04 06:10 | 13.9 |
| 2020-10-04 06:20 | 13.9 |
| 2020-10-04 06:30 | 13.9 |
| 2020-10-04 06:40 | 14   |
| 2020-10-04 06:50 | 14.1 |
| 2020-10-04 07:00 | 14.1 |
| 2020-10-04 07:10 | 14.3 |
| 2020-10-04 07:20 | 14.4 |
| 2020-10-04 07:30 | 14.7 |
| 2020-10-04 07:40 | 14.8 |
| 2020-10-04 07:50 | 15.1 |
| 2020-10-04 08:00 | 15.3 |
| 2020-10-04 08:10 | 15.3 |
| 2020-10-04 08:20 | 16.1 |
| 2020-10-04 08:30 | 16.7 |
| 2020-10-04 08:40 | 16.2 |
| 2020-10-04 08:50 | 16.3 |
| 2020-10-04 09:00 | 16.4 |
| 2020-10-04 09:10 | 16.6 |
| 2020-10-04 09:20 | 16.9 |
| 2020-10-04 09:30 | 17.3 |
| 2020-10-04 09:40 | 18.8 |
| 2020-10-04 09:50 | 19.1 |
| 2020-10-04 10:00 | 19.8 |
| 2020-10-04 10:10 | 19.9 |
| 2020-10-04 10:20 | 20.7 |
| 2020-10-04 10:30 | 21.6 |
| 2020-10-04 10:40 | 21.2 |
| 2020-10-04 10:50 | 22.1 |
| 2020-10-04 11:00 | 22.1 |
| 2020-10-04 11:10 | 21.8 |
| 2020-10-04 11:20 | 22.9 |
| 2020-10-04 11:30 | 22.9 |
| 2020-10-04 11:40 | 23.5 |
| 2020-10-04 11:50 | 23.9 |
| 2020-10-04 12:00 | 22.8 |
| 2020-10-04 12:10 | 23.1 |
| 2020-10-04 12:20 | 22.9 |
| 2020-10-04 12:30 | 24.1 |
| 2020-10-04 12:40 | 24.1 |
| 2020-10-04 12:50 | 23.6 |
| 2020-10-04 13:00 | 24.5 |
| 2020-10-04 13:10 | 23.9 |
| 2020-10-04 13:20 | 24.9 |
| 2020-10-04 13:30 | 24.1 |
| 2020-10-04 13:40 | 24.1 |
| 2020-10-04 13:50 | 24.3 |



|                  |      |
|------------------|------|
| 2020-10-04 14:00 | 24.4 |
| 2020-10-04 14:10 | 23.6 |
| 2020-10-04 14:20 | 23.6 |
| 2020-10-04 14:30 | 24.1 |
| 2020-10-04 14:40 | 24.3 |
| 2020-10-04 14:50 | 25.6 |
| 2020-10-04 15:00 | 25.1 |
| 2020-10-04 15:10 | 24.6 |
| 2020-10-04 15:20 | 24.4 |
| 2020-10-04 15:30 | 23.7 |
| 2020-10-04 15:40 | 23.8 |
| 2020-10-04 15:50 | 23.6 |
| 2020-10-04 16:00 | 23.4 |
| 2020-10-04 16:10 | 24.1 |
| 2020-10-04 16:20 | 24.3 |
| 2020-10-04 16:30 | 24.2 |
| 2020-10-04 16:40 | 24   |
| 2020-10-04 16:50 | 23.9 |
| 2020-10-04 17:00 | 23.6 |
| 2020-10-04 17:10 | 23.3 |
| 2020-10-04 17:20 | 22.6 |
| 2020-10-04 17:30 | 22.4 |
| 2020-10-04 17:40 | 22.3 |
| 2020-10-04 17:50 | 21.9 |
| 2020-10-04 18:00 | 21.5 |
| 2020-10-04 18:10 | 21.2 |
| 2020-10-04 18:20 | 20.9 |
| 2020-10-04 18:30 | 20.6 |
| 2020-10-04 18:40 | 20.4 |
| 2020-10-04 18:50 | 20.1 |
| 2020-10-04 19:00 | 19.9 |
| 2020-10-04 19:10 | 19.8 |
| 2020-10-04 19:20 | 19.6 |
| 2020-10-04 19:30 | 19.4 |
| 2020-10-04 19:40 | 19.2 |
| 2020-10-04 19:50 | 19.1 |
| 2020-10-04 20:00 | 18.9 |
| 2020-10-04 20:10 | 18.8 |
| 2020-10-04 20:20 | 18.8 |
| 2020-10-04 20:30 | 18.7 |
| 2020-10-04 20:40 | 18.6 |
| 2020-10-04 20:50 | 18.5 |
| 2020-10-04 21:00 | 18.4 |
| 2020-10-04 21:10 | 18.3 |
| 2020-10-04 21:20 | 18.3 |
| 2020-10-04 21:30 | 18.1 |
| 2020-10-04 21:40 | 18.1 |
| 2020-10-04 21:50 | 17.9 |
| 2020-10-04 22:00 | 17.8 |
| 2020-10-04 22:10 | 17.8 |



|                  |      |
|------------------|------|
| 2020-10-04 22:20 | 17.7 |
| 2020-10-04 22:30 | 17.6 |
| 2020-10-04 22:40 | 17.6 |
| 2020-10-04 22:50 | 17.5 |
| 2020-10-04 23:00 | 17.4 |
| 2020-10-04 23:10 | 17.3 |
| 2020-10-04 23:20 | 17.2 |
| 2020-10-04 23:30 | 17.1 |
| 2020-10-04 23:40 | 17.1 |
| 2020-10-04 23:50 | 16.9 |
| 2020-10-05 00:00 | 16.9 |
| 2020-10-05 00:10 | 16.8 |
| 2020-10-05 00:20 | 16.8 |
| 2020-10-05 00:30 | 16.7 |
| 2020-10-05 00:40 | 16.6 |
| 2020-10-05 00:50 | 16.6 |
| 2020-10-05 01:00 | 16.6 |
| 2020-10-05 01:10 | 16.4 |
| 2020-10-05 01:20 | 16.4 |
| 2020-10-05 01:30 | 16.4 |
| 2020-10-05 01:40 | 16.4 |
| 2020-10-05 01:50 | 16.4 |
| 2020-10-05 02:00 | 16.3 |
| 2020-10-05 02:10 | 16.2 |
| 2020-10-05 02:20 | 16.1 |
| 2020-10-05 02:30 | 16.1 |
| 2020-10-05 02:40 | 16.1 |
| 2020-10-05 02:50 | 16   |
| 2020-10-05 03:00 | 15.9 |
| 2020-10-05 03:10 | 15.9 |
| 2020-10-05 03:20 | 15.8 |
| 2020-10-05 03:30 | 15.8 |
| 2020-10-05 03:40 | 15.7 |
| 2020-10-05 03:50 | 15.6 |
| 2020-10-05 04:00 | 15.6 |
| 2020-10-05 04:10 | 15.6 |
| 2020-10-05 04:20 | 15.6 |
| 2020-10-05 04:30 | 15.5 |
| 2020-10-05 04:40 | 15.4 |
| 2020-10-05 04:50 | 15.3 |
| 2020-10-05 05:00 | 15.3 |
| 2020-10-05 05:10 | 15.3 |
| 2020-10-05 05:20 | 15.3 |
| 2020-10-05 05:30 | 15.2 |
| 2020-10-05 05:40 | 15.2 |
| 2020-10-05 05:50 | 15.2 |
| 2020-10-05 06:00 | 15.1 |
| 2020-10-05 06:10 | 15.1 |
| 2020-10-05 06:20 | 15.1 |
| 2020-10-05 06:30 | 15.2 |



|                  |      |
|------------------|------|
| 2020-10-05 06:40 | 15.3 |
| 2020-10-05 06:50 | 15.4 |
| 2020-10-05 07:00 | 15.6 |
| 2020-10-05 07:10 | 16.1 |
| 2020-10-05 07:20 | 16.6 |
| 2020-10-05 07:30 | 17.3 |
| 2020-10-05 07:40 | 18   |
| 2020-10-05 07:50 | 18.4 |
| 2020-10-05 08:00 | 18.9 |
| 2020-10-05 08:10 | 19.6 |
| 2020-10-05 08:20 | 19.9 |
| 2020-10-05 08:30 | 20   |
| 2020-10-05 08:40 | 20.6 |
| 2020-10-05 08:50 | 21.1 |
| 2020-10-05 09:00 | 21.9 |
| 2020-10-05 09:10 | 22.5 |
| 2020-10-05 09:20 | 23.2 |
| 2020-10-05 09:30 | 23.6 |
| 2020-10-05 09:40 | 23.9 |
| 2020-10-05 09:50 | 23.3 |
| 2020-10-05 10:00 | 23.6 |
| 2020-10-05 10:10 | 24.4 |
| 2020-10-05 10:20 | 24.8 |
| 2020-10-05 10:30 | 25.6 |
| 2020-10-05 10:40 | 25.6 |
| 2020-10-05 10:50 | 26.9 |
| 2020-10-05 11:00 | 26.6 |
| 2020-10-05 11:10 | 26.8 |
| 2020-10-05 11:20 | 26.8 |
| 2020-10-05 11:30 | 27.5 |
| 2020-10-05 11:40 | 27.9 |
| 2020-10-05 11:50 | 28.6 |
| 2020-10-05 12:00 | 27.8 |
| 2020-10-05 12:10 | 28.8 |
| 2020-10-05 12:20 | 28.8 |
| 2020-10-05 12:30 | 29.3 |
| 2020-10-05 12:40 | 28.4 |
| 2020-10-05 12:50 | 28.6 |
| 2020-10-05 13:00 | 29.3 |
| 2020-10-05 13:10 | 29.8 |
| 2020-10-05 13:20 | 29.4 |
| 2020-10-05 13:30 | 29.3 |
| 2020-10-05 13:40 | 30.1 |
| 2020-10-05 13:50 | 29.8 |
| 2020-10-05 14:00 | 29   |
| 2020-10-05 14:10 | 30.2 |
| 2020-10-05 14:20 | 29.4 |
| 2020-10-05 14:30 | 29.1 |
| 2020-10-05 14:40 | 28.7 |
| 2020-10-05 14:50 | 28.5 |



|                  |      |
|------------------|------|
| 2020-10-05 15:00 | 28.8 |
| 2020-10-05 15:10 | 29.1 |
| 2020-10-05 15:20 | 27.8 |
| 2020-10-05 15:30 | 27.9 |
| 2020-10-05 15:40 | 27.3 |
| 2020-10-05 15:50 | 28.4 |
| 2020-10-05 16:00 | 28.3 |
| 2020-10-05 16:10 | 27.4 |
| 2020-10-05 16:20 | 27.6 |
| 2020-10-05 16:30 | 26.8 |
| 2020-10-05 16:40 | 26.4 |
| 2020-10-05 16:50 | 26.2 |
| 2020-10-05 17:00 | 26.2 |
| 2020-10-05 17:10 | 26   |
| 2020-10-05 17:20 | 25.6 |
| 2020-10-05 17:30 | 24.9 |
| 2020-10-05 17:40 | 24.5 |
| 2020-10-05 17:50 | 23.9 |
| 2020-10-05 18:00 | 23.4 |
| 2020-10-05 18:10 | 22.8 |
| 2020-10-05 18:20 | 22.5 |
| 2020-10-05 18:30 | 22.2 |
| 2020-10-05 18:40 | 21.8 |
| 2020-10-05 18:50 | 21.5 |
| 2020-10-05 19:00 | 21.3 |
| 2020-10-05 19:10 | 21.1 |
| 2020-10-05 19:20 | 20.5 |
| 2020-10-05 19:30 | 20.1 |
| 2020-10-05 19:40 | 19.8 |
| 2020-10-05 19:50 | 19.5 |
| 2020-10-05 20:00 | 19.3 |
| 2020-10-05 20:10 | 19.1 |
| 2020-10-05 20:20 | 18.8 |
| 2020-10-05 20:30 | 18.4 |
| 2020-10-05 20:40 | 18.3 |
| 2020-10-05 20:50 | 18.1 |
| 2020-10-05 21:00 | 17.9 |
| 2020-10-05 21:10 | 17.7 |
| 2020-10-05 21:20 | 17.5 |
| 2020-10-05 21:30 | 17.3 |
| 2020-10-05 21:40 | 17.1 |
| 2020-10-05 21:50 | 16.9 |
| 2020-10-05 22:00 | 16.8 |
| 2020-10-05 22:10 | 16.8 |
| 2020-10-05 22:20 | 16.6 |
| 2020-10-05 22:30 | 16.6 |
| 2020-10-05 22:40 | 16.4 |
| 2020-10-05 22:50 | 16.3 |
| 2020-10-05 23:00 | 16.1 |
| 2020-10-05 23:10 | 16   |



|                  |      |
|------------------|------|
| 2020-10-05 23:20 | 15.9 |
| 2020-10-05 23:30 | 15.8 |
| 2020-10-05 23:40 | 15.7 |
| 2020-10-05 23:50 | 15.6 |
| 2020-10-06 00:00 | 15.4 |
| 2020-10-06 00:10 | 15.3 |
| 2020-10-06 00:20 | 15.3 |
| 2020-10-06 00:30 | 15.1 |
| 2020-10-06 00:40 | 14.8 |
| 2020-10-06 00:50 | 14.6 |
| 2020-10-06 01:00 | 14.5 |
| 2020-10-06 01:10 | 14.4 |
| 2020-10-06 01:20 | 14.4 |
| 2020-10-06 01:30 | 14.3 |
| 2020-10-06 01:40 | 14.3 |
| 2020-10-06 01:50 | 14.4 |
| 2020-10-06 02:00 | 14.4 |
| 2020-10-06 02:10 | 14.4 |
| 2020-10-06 02:20 | 14.3 |
| 2020-10-06 02:30 | 14.1 |
| 2020-10-06 02:40 | 14.2 |
| 2020-10-06 02:50 | 14.2 |
| 2020-10-06 03:00 | 14.1 |
| 2020-10-06 03:10 | 14.1 |
| 2020-10-06 03:20 | 14.3 |
| 2020-10-06 03:30 | 14.2 |
| 2020-10-06 03:40 | 14.2 |
| 2020-10-06 03:50 | 14.1 |
| 2020-10-06 04:00 | 14.1 |
| 2020-10-06 04:10 | 14.1 |
| 2020-10-06 04:20 | 14.1 |
| 2020-10-06 04:30 | 13.9 |
| 2020-10-06 04:40 | 13.9 |
| 2020-10-06 04:50 | 14   |
| 2020-10-06 05:00 | 13.9 |
| 2020-10-06 05:10 | 13.9 |
| 2020-10-06 05:20 | 13.9 |
| 2020-10-06 05:30 | 14   |
| 2020-10-06 05:40 | 14   |
| 2020-10-06 05:50 | 14.1 |
| 2020-10-06 06:00 | 14.1 |
| 2020-10-06 06:10 | 14.2 |
| 2020-10-06 06:20 | 14.1 |
| 2020-10-06 06:30 | 14.3 |
| 2020-10-06 06:40 | 14.2 |
| 2020-10-06 06:50 | 14.1 |
| 2020-10-06 07:00 | 14.3 |
| 2020-10-06 07:10 | 14.8 |
| 2020-10-06 07:20 | 14.9 |
| 2020-10-06 07:30 | 15.3 |



|                  |      |
|------------------|------|
| 2020-10-06 07:40 | 15.6 |
| 2020-10-06 07:50 | 16.2 |
| 2020-10-06 08:00 | 16.4 |
| 2020-10-06 08:10 | 16.8 |
| 2020-10-06 08:20 | 16.8 |
| 2020-10-06 08:30 | 17.4 |
| 2020-10-06 08:40 | 18.1 |
| 2020-10-06 08:50 | 18   |
| 2020-10-06 09:00 | 18.8 |
| 2020-10-06 09:10 | 19.7 |
| 2020-10-06 09:20 | 20.4 |
| 2020-10-06 09:30 | 21.8 |
| 2020-10-06 09:40 | 21.2 |
| 2020-10-06 09:50 | 22.4 |
| 2020-10-06 10:00 | 22.6 |
| 2020-10-06 10:10 | 23   |
| 2020-10-06 10:20 | 24.3 |
| 2020-10-06 10:30 | 25   |
| 2020-10-06 10:40 | 25   |
| 2020-10-06 10:50 | 24.9 |
| 2020-10-06 11:00 | 24.9 |
| 2020-10-06 11:10 | 26.6 |
| 2020-10-06 11:20 | 27.3 |
| 2020-10-06 11:30 | 26.9 |
| 2020-10-06 11:40 | 27.9 |
| 2020-10-06 11:50 | 28.6 |
| 2020-10-06 12:00 | 29.1 |
| 2020-10-06 12:10 | 29.8 |
| 2020-10-06 12:20 | 30.5 |
| 2020-10-06 12:30 | 29.9 |
| 2020-10-06 12:40 | 29.6 |
| 2020-10-06 12:50 | 29.4 |
| 2020-10-06 13:00 | 31.8 |
| 2020-10-06 13:10 | 32.1 |
| 2020-10-06 13:20 | 32.3 |
| 2020-10-06 13:30 | 30.9 |
| 2020-10-06 13:40 | 31.1 |
| 2020-10-06 13:50 | 31.5 |
| 2020-10-06 14:00 | 33.6 |
| 2020-10-06 14:10 | 32   |
| 2020-10-06 14:20 | 32.6 |
| 2020-10-06 14:30 | 32.8 |
| 2020-10-06 14:40 | 32.4 |
| 2020-10-06 14:50 | 33.3 |
| 2020-10-06 15:10 | 33.1 |
| 2020-10-06 15:20 | 32.5 |
| 2020-10-06 15:30 | 33.2 |
| 2020-10-06 15:40 | 33   |
| 2020-10-06 15:50 | 34.6 |
| 2020-10-06 16:00 | 32.5 |



|                  |      |
|------------------|------|
| 2020-10-06 16:10 | 32.1 |
| 2020-10-06 16:20 | 32.4 |
| 2020-10-06 16:30 | 31.2 |
| 2020-10-06 16:40 | 31.9 |
| 2020-10-06 17:00 | 31.3 |
| 2020-10-06 17:10 | 30.4 |
| 2020-10-06 17:20 | 30.1 |
| 2020-10-06 17:30 | 29.1 |
| 2020-10-06 17:40 | 28.7 |
| 2020-10-06 17:50 | 28.1 |
| 2020-10-06 18:00 | 27.6 |
| 2020-10-06 18:20 | 26.6 |
| 2020-10-06 18:30 | 26.3 |
| 2020-10-06 18:40 | 25.8 |
| 2020-10-06 18:50 | 25.8 |
| 2020-10-06 19:00 | 25.2 |
| 2020-10-06 19:10 | 24.8 |
| 2020-10-06 19:20 | 24.6 |
| 2020-10-06 19:30 | 24.8 |
| 2020-10-06 19:40 | 24.4 |
| 2020-10-06 19:50 | 23.9 |
| 2020-10-06 20:20 | 23.6 |
| 2020-10-06 20:30 | 23.3 |
| 2020-10-06 20:40 | 23   |
| 2020-10-06 20:50 | 22.8 |
| 2020-10-06 21:00 | 22.8 |
| 2020-10-06 21:10 | 22.6 |
| 2020-10-06 21:20 | 22.5 |
| 2020-10-06 21:30 | 22.6 |
| 2020-10-06 21:40 | 22.8 |
| 2020-10-06 21:50 | 22.6 |
| 2020-10-06 22:00 | 22.6 |
| 2020-10-06 22:10 | 22.6 |
| 2020-10-06 22:20 | 22.8 |
| 2020-10-06 22:30 | 23.3 |
| 2020-10-06 22:40 | 23.5 |
| 2020-10-06 22:50 | 23.8 |
| 2020-10-06 23:00 | 22.9 |
| 2020-10-06 23:10 | 22.2 |
| 2020-10-06 23:20 | 22.1 |
| 2020-10-06 23:30 | 21.8 |
| 2020-10-06 23:40 | 21.7 |
| 2020-10-06 23:50 | 21.4 |
| 2020-10-07 00:00 | 21.2 |
| 2020-10-07 00:10 | 21   |
| 2020-10-07 00:20 | 20.9 |
| 2020-10-07 00:30 | 20.7 |
| 2020-10-07 00:40 | 20.4 |
| 2020-10-07 00:50 | 20   |
| 2020-10-07 01:00 | 19.8 |



|                  |      |
|------------------|------|
| 2020-10-07 01:10 | 19.4 |
| 2020-10-07 01:20 | 20.1 |
| 2020-10-07 01:30 | 20.3 |
| 2020-10-07 01:40 | 20.2 |
| 2020-10-07 01:50 | 20.4 |
| 2020-10-07 02:00 | 20.1 |
| 2020-10-07 02:10 | 19.7 |
| 2020-10-07 02:30 | 19.4 |
| 2020-10-07 02:40 | 19.2 |
| 2020-10-07 02:50 | 19.1 |
| 2020-10-07 03:00 | 19.8 |
| 2020-10-07 03:10 | 19.8 |
| 2020-10-07 03:20 | 19.3 |
| 2020-10-07 03:30 | 19.5 |
| 2020-10-07 03:40 | 20   |
| 2020-10-07 03:50 | 19.7 |
| 2020-10-07 04:00 | 19.4 |
| 2020-10-07 04:10 | 19.3 |
| 2020-10-07 04:20 | 19.3 |
| 2020-10-07 04:30 | 19.5 |
| 2020-10-07 04:40 | 19.6 |
| 2020-10-07 04:50 | 19.8 |
| 2020-10-07 05:00 | 19.9 |
| 2020-10-07 05:10 | 19.9 |
| 2020-10-07 05:20 | 20.1 |
| 2020-10-07 05:30 | 20.1 |
| 2020-10-07 05:40 | 19.8 |
| 2020-10-07 05:50 | 19.6 |
| 2020-10-07 06:00 | 19.6 |
| 2020-10-07 06:10 | 19.6 |
| 2020-10-07 06:20 | 19.4 |
| 2020-10-07 06:30 | 19.4 |
| 2020-10-07 06:40 | 19.5 |
| 2020-10-07 06:50 | 19.6 |
| 2020-10-07 07:00 | 20.1 |
| 2020-10-07 07:10 | 20.6 |
| 2020-10-07 07:20 | 21.1 |
| 2020-10-07 07:30 | 21.8 |
| 2020-10-07 07:40 | 22.4 |
| 2020-10-07 07:50 | 23.5 |
| 2020-10-07 08:00 | 24.3 |
| 2020-10-07 08:10 | 25.4 |
| 2020-10-07 08:20 | 26   |
| 2020-10-07 08:30 | 25.4 |
| 2020-10-07 08:40 | 26.6 |
| 2020-10-07 08:50 | 27.8 |
| 2020-10-07 09:00 | 27.1 |
| 2020-10-07 09:10 | 26.9 |
| 2020-10-07 09:20 | 26.9 |
| 2020-10-07 09:30 | 27.8 |



|                  |      |
|------------------|------|
| 2020-10-07 09:40 | 28.7 |
| 2020-10-07 09:50 | 27.9 |
| 2020-10-07 10:00 | 28.2 |
| 2020-10-07 10:10 | 28.3 |
| 2020-10-07 10:20 | 29.4 |
| 2020-10-07 10:30 | 29.6 |
| 2020-10-07 10:40 | 29.8 |
| 2020-10-07 10:50 | 29.8 |
| 2020-10-07 11:00 | 30.4 |
| 2020-10-07 11:10 | 31   |
| 2020-10-07 11:20 | 30.5 |
| 2020-10-07 11:30 | 30.9 |
| 2020-10-07 11:40 | 30.8 |
| 2020-10-07 12:00 | 31.4 |
| 2020-10-07 12:10 | 31.4 |
| 2020-10-07 12:20 | 31.1 |
| 2020-10-07 12:30 | 31.3 |
| 2020-10-07 12:40 | 31.2 |
| 2020-10-07 12:50 | 31.8 |
| 2020-10-07 13:00 | 31.2 |
| 2020-10-07 13:10 | 31.6 |
| 2020-10-07 13:20 | 31.6 |
| 2020-10-07 13:30 | 31.4 |
| 2020-10-07 13:40 | 31.7 |
| 2020-10-07 13:50 | 31.4 |
| 2020-10-07 14:00 | 31.7 |
| 2020-10-07 14:10 | 31.7 |
| 2020-10-07 14:20 | 32.2 |
| 2020-10-07 14:30 | 31.5 |
| 2020-10-07 14:40 | 31.6 |
| 2020-10-07 14:50 | 31.6 |
| 2020-10-07 15:00 | 31.8 |
| 2020-10-07 15:10 | 30.9 |
| 2020-10-07 15:30 | 30.6 |
| 2020-10-07 15:40 | 31   |
| 2020-10-07 15:50 | 30.7 |
| 2020-10-07 16:00 | 30.4 |
| 2020-10-07 16:10 | 30.6 |
| 2020-10-07 16:20 | 29.9 |
| 2020-10-07 16:30 | 29.6 |
| 2020-10-07 16:40 | 28.9 |
| 2020-10-07 16:50 | 29.2 |
| 2020-10-07 17:00 | 28.6 |
| 2020-10-07 17:10 | 28.4 |
| 2020-10-07 17:20 | 28.1 |
| 2020-10-07 17:30 | 27.4 |
| 2020-10-07 17:40 | 27.3 |
| 2020-10-07 17:50 | 26.6 |
| 2020-10-07 18:00 | 26.1 |
| 2020-10-07 18:10 | 25.3 |



|                  |      |
|------------------|------|
| 2020-10-07 18:20 | 24.8 |
| 2020-10-07 18:30 | 24.4 |
| 2020-10-07 18:50 | 23.5 |
| 2020-10-07 19:00 | 22.9 |
| 2020-10-07 19:10 | 22.6 |
| 2020-10-07 19:20 | 22.4 |
| 2020-10-07 19:30 | 22.2 |
| 2020-10-07 19:40 | 22   |
| 2020-10-07 19:50 | 21.9 |
| 2020-10-07 20:00 | 21.7 |
| 2020-10-07 20:10 | 21.6 |
| 2020-10-07 20:20 | 21.4 |
| 2020-10-07 20:30 | 21.1 |
| 2020-10-07 20:40 | 21   |
| 2020-10-07 20:50 | 20.8 |
| 2020-10-07 21:00 | 20.6 |
| 2020-10-07 21:10 | 20.4 |
| 2020-10-07 21:20 | 20.4 |
| 2020-10-07 21:30 | 20.4 |
| 2020-10-07 21:40 | 20.5 |
| 2020-10-07 21:50 | 20.3 |
| 2020-10-07 22:00 | 19.9 |
| 2020-10-07 22:10 | 20.2 |
| 2020-10-07 22:20 | 20   |
| 2020-10-07 22:30 | 20.1 |
| 2020-10-07 22:40 | 19.9 |
| 2020-10-07 22:50 | 19.9 |
| 2020-10-07 23:00 | 19.8 |
| 2020-10-07 23:10 | 19.8 |
| 2020-10-07 23:20 | 19.1 |
| 2020-10-07 23:30 | 18.8 |
| 2020-10-07 23:40 | 18.7 |
| 2020-10-08 00:00 | 18.3 |
| 2020-10-08 00:10 | 18.5 |
| 2020-10-08 00:20 | 18.6 |
| 2020-10-08 00:30 | 18.3 |
| 2020-10-08 00:40 | 18.1 |
| 2020-10-08 00:50 | 18.4 |
| 2020-10-08 01:00 | 18.4 |
| 2020-10-08 01:10 | 18.5 |
| 2020-10-08 01:20 | 18.4 |
| 2020-10-08 01:30 | 18.3 |
| 2020-10-08 01:40 | 18.1 |
| 2020-10-08 01:50 | 17.9 |
| 2020-10-08 02:00 | 17.9 |
| 2020-10-08 02:10 | 17.8 |
| 2020-10-08 02:20 | 17.8 |
| 2020-10-08 02:30 | 17.8 |
| 2020-10-08 02:40 | 18.1 |
| 2020-10-08 02:50 | 18   |



|                  |      |
|------------------|------|
| 2020-10-08 03:00 | 18.2 |
| 2020-10-08 03:10 | 18.4 |
| 2020-10-08 03:20 | 18.5 |
| 2020-10-08 03:30 | 18.9 |
| 2020-10-08 03:40 | 19.1 |
| 2020-10-08 03:50 | 18.9 |
| 2020-10-08 04:00 | 19.1 |
| 2020-10-08 04:10 | 18.9 |
| 2020-10-08 04:20 | 18.3 |
| 2020-10-08 04:30 | 18.6 |
| 2020-10-08 04:40 | 20.4 |
| 2020-10-08 04:50 | 19.4 |
| 2020-10-08 05:00 | 18.3 |
| 2020-10-08 05:10 | 18.1 |
| 2020-10-08 05:20 | 18.3 |
| 2020-10-08 05:30 | 18   |
| 2020-10-08 05:40 | 18.8 |
| 2020-10-08 05:50 | 18.9 |
| 2020-10-08 06:00 | 17.9 |
| 2020-10-08 06:10 | 18   |
| 2020-10-08 06:20 | 18   |
| 2020-10-08 06:30 | 17.9 |
| 2020-10-08 06:40 | 17.8 |
| 2020-10-08 06:50 | 17.8 |
| 2020-10-08 07:00 | 17.8 |
| 2020-10-08 07:10 | 17.6 |
| 2020-10-08 07:20 | 17.6 |
| 2020-10-08 07:30 | 17.9 |
| 2020-10-08 07:40 | 17.9 |
| 2020-10-08 07:50 | 17.9 |
| 2020-10-08 08:00 | 18.2 |
| 2020-10-08 08:10 | 18.7 |
| 2020-10-08 08:20 | 19.6 |
| 2020-10-08 08:30 | 19.8 |
| 2020-10-08 08:40 | 19.7 |
| 2020-10-08 08:50 | 19.4 |
| 2020-10-08 09:00 | 19.1 |
| 2020-10-08 09:10 | 18.9 |
| 2020-10-08 09:30 | 19.2 |
| 2020-10-08 09:40 | 19.8 |
| 2020-10-08 09:50 | 20.5 |
| 2020-10-08 10:00 | 20.3 |
| 2020-10-08 10:10 | 20.9 |
| 2020-10-08 10:20 | 21.3 |
| 2020-10-08 10:30 | 21.4 |
| 2020-10-08 10:40 | 21.3 |
| 2020-10-08 10:50 | 21.4 |
| 2020-10-08 11:00 | 23.4 |
| 2020-10-08 11:10 | 24.4 |
| 2020-10-08 11:20 | 23.8 |



|                  |      |
|------------------|------|
| 2020-10-08 11:40 | 23.8 |
| 2020-10-08 11:50 | 23.4 |
| 2020-10-08 12:00 | 22.3 |
| 2020-10-08 12:10 | 23.2 |
| 2020-10-08 12:20 | 23.8 |
| 2020-10-08 12:30 | 22.9 |
| 2020-10-08 12:40 | 22.8 |
| 2020-10-08 12:50 | 24.9 |
| 2020-10-08 13:00 | 23.9 |
| 2020-10-08 13:10 | 22.9 |
| 2020-10-08 13:20 | 22.6 |
| 2020-10-08 13:30 | 22.9 |
| 2020-10-08 13:40 | 22.7 |
| 2020-10-08 13:50 | 22.6 |
| 2020-10-08 14:00 | 22.8 |
| 2020-10-08 14:10 | 23   |
| 2020-10-08 14:20 | 23.4 |
| 2020-10-08 14:30 | 22.4 |
| 2020-10-08 14:40 | 22   |
| 2020-10-08 14:50 | 22.1 |
| 2020-10-08 15:00 | 21.9 |
| 2020-10-08 15:10 | 21.6 |
| 2020-10-08 15:20 | 21.1 |
| 2020-10-08 15:30 | 20.9 |
| 2020-10-08 15:40 | 21   |
| 2020-10-08 15:50 | 21.1 |
| 2020-10-08 16:00 | 20.6 |
| 2020-10-08 16:10 | 20.3 |
| 2020-10-08 16:20 | 20   |
| 2020-10-08 16:30 | 19.8 |
| 2020-10-08 16:40 | 19.4 |
| 2020-10-08 16:50 | 19.2 |
| 2020-10-08 17:00 | 18.9 |
| 2020-10-08 17:10 | 18.7 |
| 2020-10-08 17:20 | 18.5 |
| 2020-10-08 17:30 | 18.3 |
| 2020-10-08 17:40 | 18.3 |
| 2020-10-08 17:50 | 18.3 |
| 2020-10-08 18:00 | 18.2 |
| 2020-10-08 18:10 | 18.1 |
| 2020-10-08 18:20 | 17.9 |
| 2020-10-08 18:40 | 17.7 |
| 2020-10-08 18:50 | 17.6 |
| 2020-10-08 19:00 | 17.5 |
| 2020-10-08 19:10 | 17.4 |
| 2020-10-08 19:20 | 17.3 |
| 2020-10-08 19:30 | 17.1 |
| 2020-10-08 19:40 | 17.1 |
| 2020-10-08 19:50 | 16.9 |
| 2020-10-08 20:00 | 16.8 |



|                  |      |
|------------------|------|
| 2020-10-08 20:10 | 16.8 |
| 2020-10-08 20:20 | 16.8 |
| 2020-10-08 20:30 | 16.5 |
| 2020-10-08 20:40 | 16.3 |
| 2020-10-08 20:50 | 16.2 |
| 2020-10-08 21:00 | 16.1 |
| 2020-10-08 21:10 | 16.1 |
| 2020-10-08 21:20 | 15.9 |
| 2020-10-08 21:30 | 16   |
| 2020-10-08 21:40 | 15.9 |
| 2020-10-08 21:50 | 15.9 |
| 2020-10-08 22:00 | 15.8 |
| 2020-10-08 22:10 | 15.8 |
| 2020-10-08 22:20 | 15.7 |
| 2020-10-08 22:30 | 15.6 |
| 2020-10-08 22:40 | 15.6 |
| 2020-10-08 22:50 | 15.4 |
| 2020-10-08 23:00 | 15.4 |
| 2020-10-08 23:10 | 15.4 |
| 2020-10-08 23:20 | 15.3 |
| 2020-10-08 23:30 | 15.3 |
| 2020-10-08 23:40 | 15.2 |
| 2020-10-08 23:50 | 15.2 |
| 2020-10-09 00:00 | 15.1 |
| 2020-10-09 00:10 | 15.1 |
| 2020-10-09 00:20 | 15   |
| 2020-10-09 00:30 | 14.9 |
| 2020-10-09 00:40 | 15.1 |
| 2020-10-09 01:00 | 14.9 |
| 2020-10-09 01:10 | 14.8 |
| 2020-10-09 01:20 | 14.8 |
| 2020-10-09 01:30 | 14.6 |
| 2020-10-09 01:40 | 14.6 |
| 2020-10-09 01:50 | 14.8 |
| 2020-10-09 02:00 | 14.8 |
| 2020-10-09 02:10 | 14.7 |
| 2020-10-09 02:20 | 14.4 |
| 2020-10-09 02:30 | 14.3 |
| 2020-10-09 02:40 | 14.2 |
| 2020-10-09 02:50 | 14.1 |
| 2020-10-09 03:00 | 14   |
| 2020-10-09 03:10 | 14.2 |
| 2020-10-09 03:20 | 14.3 |
| 2020-10-09 03:30 | 14.4 |
| 2020-10-09 03:50 | 14.7 |
| 2020-10-09 04:00 | 14.7 |
| 2020-10-09 04:10 | 14.8 |
| 2020-10-09 04:20 | 14.8 |
| 2020-10-09 04:30 | 14.9 |
| 2020-10-09 04:40 | 14.8 |



|                  |      |
|------------------|------|
| 2020-10-09 04:50 | 14.9 |
| 2020-10-09 05:00 | 14.9 |
| 2020-10-09 05:10 | 14.8 |
| 2020-10-09 05:20 | 14.8 |
| 2020-10-09 05:30 | 14.8 |
| 2020-10-09 05:40 | 14.8 |
| 2020-10-09 05:50 | 14.8 |
| 2020-10-09 06:00 | 14.9 |
| 2020-10-09 06:10 | 14.9 |
| 2020-10-09 06:20 | 14.9 |
| 2020-10-09 06:30 | 15   |
| 2020-10-09 06:40 | 15   |
| 2020-10-09 06:50 | 15.1 |
| 2020-10-09 07:10 | 15.2 |
| 2020-10-09 07:20 | 15.1 |
| 2020-10-09 07:30 | 15.3 |
| 2020-10-09 07:40 | 15.1 |
| 2020-10-09 07:50 | 15.2 |
| 2020-10-09 08:00 | 15.2 |
| 2020-10-09 08:10 | 15.4 |
| 2020-10-09 08:20 | 15.4 |
| 2020-10-09 08:30 | 15.7 |
| 2020-10-09 08:40 | 15.7 |
| 2020-10-09 08:50 | 15.7 |
| 2020-10-09 09:00 | 16   |
| 2020-10-09 09:20 | 16.3 |
| 2020-10-09 09:30 | 16.3 |
| 2020-10-09 09:40 | 16   |
| 2020-10-09 09:50 | 16.3 |
| 2020-10-09 10:00 | 16.2 |
| 2020-10-09 10:10 | 16.3 |
| 2020-10-09 10:20 | 16.4 |
| 2020-10-09 10:30 | 16.6 |
| 2020-10-09 10:40 | 16.6 |
| 2020-10-09 10:50 | 16.7 |
| 2020-10-09 11:00 | 16.9 |
| 2020-10-09 11:10 | 17.3 |
| 2020-10-09 11:20 | 17.4 |
| 2020-10-09 11:30 | 17.1 |
| 2020-10-09 11:40 | 17.3 |
| 2020-10-09 11:50 | 17.3 |
| 2020-10-09 12:00 | 17.4 |
| 2020-10-09 12:10 | 17.3 |
| 2020-10-09 12:20 | 17.4 |
| 2020-10-09 12:30 | 17.3 |
| 2020-10-09 12:40 | 17.4 |
| 2020-10-09 12:50 | 17.6 |
| 2020-10-09 13:00 | 17.6 |
| 2020-10-09 13:10 | 18.6 |
| 2020-10-09 13:20 | 18.4 |



|                  |      |
|------------------|------|
| 2020-10-09 13:30 | 18.4 |
| 2020-10-09 13:40 | 18.6 |
| 2020-10-09 13:50 | 19   |
| 2020-10-09 14:00 | 18.6 |
| 2020-10-09 14:10 | 18.3 |
| 2020-10-09 14:20 | 18.4 |
| 2020-10-09 14:30 | 18.6 |
| 2020-10-09 14:40 | 18.5 |
| 2020-10-09 14:50 | 18.6 |
| 2020-10-09 15:00 | 18.6 |
| 2020-10-09 15:10 | 17.6 |
| 2020-10-09 15:20 | 17.5 |
| 2020-10-09 15:30 | 17.6 |
| 2020-10-09 15:40 | 17.8 |
| 2020-10-09 15:50 | 17.9 |
| 2020-10-09 16:00 | 17.9 |
| 2020-10-09 16:10 | 17.8 |
| 2020-10-09 16:20 | 17.8 |
| 2020-10-09 16:30 | 17.8 |
| 2020-10-09 16:40 | 17.8 |
| 2020-10-09 16:50 | 17.8 |
| 2020-10-09 17:00 | 17.9 |
| 2020-10-09 17:10 | 17.9 |
| 2020-10-09 17:20 | 17.9 |
| 2020-10-09 17:30 | 17.8 |
| 2020-10-09 17:40 | 17.8 |
| 2020-10-09 17:50 | 18.2 |
| 2020-10-09 18:00 | 17.9 |
| 2020-10-09 18:10 | 17.7 |
| 2020-10-09 18:20 | 17.3 |
| 2020-10-09 18:30 | 16.9 |
| 2020-10-09 18:40 | 16.3 |
| 2020-10-09 18:50 | 15.8 |
| 2020-10-09 19:00 | 15.3 |
| 2020-10-09 19:10 | 15.1 |
| 2020-10-09 19:20 | 15.1 |
| 2020-10-09 19:30 | 15.1 |
| 2020-10-09 19:40 | 15.2 |
| 2020-10-09 19:50 | 15   |
| 2020-10-09 20:00 | 14.8 |
| 2020-10-09 20:10 | 14.3 |
| 2020-10-09 20:20 | 14.4 |
| 2020-10-09 20:30 | 14.4 |
| 2020-10-09 20:40 | 13.9 |
| 2020-10-09 20:50 | 13.4 |
| 2020-10-09 21:00 | 13.4 |
| 2020-10-09 21:10 | 13.1 |
| 2020-10-09 21:20 | 12.8 |
| 2020-10-09 21:30 | 12.9 |
| 2020-10-09 21:40 | 12.6 |



|                  |      |
|------------------|------|
| 2020-10-09 21:50 | 12.8 |
| 2020-10-09 22:00 | 13.6 |
| 2020-10-09 22:10 | 13.6 |
| 2020-10-09 22:20 | 12.9 |
| 2020-10-09 22:30 | 12.9 |
| 2020-10-09 22:40 | 12.9 |
| 2020-10-09 22:50 | 13.3 |
| 2020-10-09 23:00 | 13.6 |
| 2020-10-09 23:10 | 13.5 |
| 2020-10-09 23:20 | 13.9 |
| 2020-10-09 23:30 | 13.4 |
| 2020-10-09 23:40 | 13.3 |
| 2020-10-09 23:50 | 13.6 |
| 2020-10-10 00:00 | 13.4 |
| 2020-10-10 00:10 | 13.6 |
| 2020-10-10 00:20 | 13.2 |
| 2020-10-10 00:30 | 13.3 |
| 2020-10-10 00:40 | 13.1 |
| 2020-10-10 00:50 | 13.4 |
| 2020-10-10 01:00 | 13.1 |
| 2020-10-10 01:10 | 12.9 |
| 2020-10-10 01:20 | 12.6 |
| 2020-10-10 01:30 | 12.8 |
| 2020-10-10 01:40 | 12.5 |
| 2020-10-10 02:10 | 12.2 |
| 2020-10-10 02:20 | 12.1 |
| 2020-10-10 02:30 | 11.8 |
| 2020-10-10 02:40 | 11.8 |
| 2020-10-10 02:50 | 11.7 |
| 2020-10-10 03:00 | 11.4 |
| 2020-10-10 03:10 | 11.6 |
| 2020-10-10 03:20 | 11.6 |
| 2020-10-10 03:30 | 11.2 |
| 2020-10-10 03:40 | 11.6 |
| 2020-10-10 03:50 | 11.6 |
| 2020-10-10 04:10 | 11.4 |
| 2020-10-10 04:20 | 11.3 |
| 2020-10-10 04:30 | 11.2 |
| 2020-10-10 04:40 | 10.9 |
| 2020-10-10 04:50 | 10.8 |
| 2020-10-10 05:00 | 10.8 |
| 2020-10-10 05:10 | 10.4 |
| 2020-10-10 05:20 | 10.6 |
| 2020-10-10 05:30 | 10.5 |
| 2020-10-10 05:40 | 10.3 |
| 2020-10-10 05:50 | 10.1 |
| 2020-10-10 06:00 | 9.9  |
| 2020-10-10 06:10 | 9.9  |
| 2020-10-10 06:20 | 9.9  |
| 2020-10-10 06:30 | 10.1 |



|                  |      |
|------------------|------|
| 2020-10-10 06:40 | 10.5 |
| 2020-10-10 06:50 | 10.7 |
| 2020-10-10 07:00 | 11.4 |
| 2020-10-10 07:10 | 12.3 |
| 2020-10-10 07:20 | 12.4 |
| 2020-10-10 07:30 | 12.7 |
| 2020-10-10 07:40 | 13.1 |
| 2020-10-10 07:50 | 12.9 |
| 2020-10-10 08:00 | 13.3 |
| 2020-10-10 08:10 | 13.8 |
| 2020-10-10 08:20 | 13.4 |
| 2020-10-10 08:30 | 13.9 |
| 2020-10-10 08:40 | 14.4 |
| 2020-10-10 08:50 | 15.3 |
| 2020-10-10 09:00 | 15.4 |
| 2020-10-10 09:10 | 16.2 |
| 2020-10-10 09:20 | 16.1 |
| 2020-10-10 09:30 | 16.9 |
| 2020-10-10 09:40 | 17.1 |
| 2020-10-10 09:50 | 17.5 |
| 2020-10-10 10:00 | 17.9 |
| 2020-10-10 10:10 | 17.9 |
| 2020-10-10 10:20 | 18.6 |
| 2020-10-10 10:30 | 19.1 |
| 2020-10-10 10:40 | 19.9 |
| 2020-10-10 10:50 | 20.6 |
| 2020-10-10 11:00 | 20.3 |
| 2020-10-10 11:10 | 21   |
| 2020-10-10 11:20 | 21.4 |
| 2020-10-10 11:30 | 21.3 |
| 2020-10-10 11:40 | 21.8 |
| 2020-10-10 11:50 | 21.9 |
| 2020-10-10 12:10 | 21.4 |
| 2020-10-10 12:20 | 22.4 |
| 2020-10-10 12:30 | 23.5 |
| 2020-10-10 12:40 | 22.9 |
| 2020-10-10 12:50 | 23.4 |
| 2020-10-10 13:00 | 23.9 |
| 2020-10-10 13:10 | 22.6 |
| 2020-10-10 13:20 | 22.7 |
| 2020-10-10 13:30 | 23.5 |
| 2020-10-10 13:40 | 24.9 |
| 2020-10-10 14:00 | 26   |
| 2020-10-10 14:10 | 24   |
| 2020-10-10 14:20 | 26.3 |
| 2020-10-10 14:30 | 26   |
| 2020-10-10 14:40 | 25.3 |
| 2020-10-10 14:50 | 26.4 |
| 2020-10-10 15:00 | 25.6 |
| 2020-10-10 15:10 | 26.9 |



|                  |      |
|------------------|------|
| 2020-10-10 15:20 | 26.8 |
| 2020-10-10 15:40 | 25.9 |
| 2020-10-10 15:50 | 26.3 |
| 2020-10-10 16:00 | 26.3 |
| 2020-10-10 16:10 | 24.9 |
| 2020-10-10 16:30 | 24.5 |
| 2020-10-10 16:40 | 24.3 |
| 2020-10-10 16:50 | 25.4 |
| 2020-10-10 17:00 | 24.9 |
| 2020-10-10 17:10 | 24.8 |
| 2020-10-10 17:20 | 25.1 |
| 2020-10-10 17:30 | 24.3 |
| 2020-10-10 17:40 | 24.7 |
| 2020-10-10 17:50 | 23.8 |
| 2020-10-10 18:00 | 23.3 |
| 2020-10-10 18:10 | 21.8 |
| 2020-10-10 18:20 | 20.6 |
| 2020-10-10 18:30 | 20.1 |
| 2020-10-10 18:40 | 19.2 |
| 2020-10-10 18:50 | 18.5 |
| 2020-10-10 19:00 | 17.8 |
| 2020-10-10 19:10 | 17.8 |
| 2020-10-10 19:20 | 16.8 |
| 2020-10-10 19:30 | 16.6 |
| 2020-10-10 19:50 | 15.6 |
| 2020-10-10 20:00 | 15.9 |
| 2020-10-10 20:10 | 15.6 |
| 2020-10-10 20:20 | 15.3 |
| 2020-10-10 20:30 | 15.1 |
| 2020-10-10 20:40 | 15   |
| 2020-10-10 20:50 | 14.6 |
| 2020-10-10 21:00 | 14.7 |
| 2020-10-10 21:10 | 15.6 |
| 2020-10-10 21:20 | 15.8 |
| 2020-10-10 21:30 | 16   |
| 2020-10-10 21:40 | 15.9 |
| 2020-10-10 21:50 | 15.6 |
| 2020-10-10 22:00 | 15.6 |
| 2020-10-10 22:10 | 15.7 |
| 2020-10-10 22:20 | 15.6 |
| 2020-10-10 22:30 | 15.3 |
| 2020-10-10 22:40 | 14.9 |
| 2020-10-10 22:50 | 14.5 |
| 2020-10-10 23:00 | 14.2 |
| 2020-10-10 23:10 | 13.9 |
| 2020-10-10 23:20 | 14   |
| 2020-10-10 23:30 | 14.1 |
| 2020-10-10 23:40 | 13.8 |
| 2020-10-10 23:50 | 13.5 |
| 2020-10-11 00:00 | 13.2 |



|                  |      |
|------------------|------|
| 2020-10-11 00:10 | 12.9 |
| 2020-10-11 00:20 | 12.9 |
| 2020-10-11 00:30 | 12.7 |
| 2020-10-11 00:40 | 12.6 |
| 2020-10-11 00:50 | 12.6 |
| 2020-10-11 01:00 | 12.4 |
| 2020-10-11 01:10 | 12.3 |
| 2020-10-11 01:20 | 11.9 |
| 2020-10-11 01:30 | 11.8 |
| 2020-10-11 01:40 | 11.6 |
| 2020-10-11 01:50 | 11.4 |
| 2020-10-11 02:00 | 11.4 |
| 2020-10-11 02:10 | 11.2 |
| 2020-10-11 02:20 | 11.1 |
| 2020-10-11 02:30 | 11   |
| 2020-10-11 02:40 | 10.9 |
| 2020-10-11 03:00 | 10.8 |
| 2020-10-11 03:10 | 10.6 |
| 2020-10-11 03:20 | 10.4 |
| 2020-10-11 03:30 | 10.4 |
| 2020-10-11 03:40 | 10.4 |
| 2020-10-11 03:50 | 10.1 |
| 2020-10-11 04:00 | 10   |
| 2020-10-11 04:10 | 9.9  |
| 2020-10-11 04:20 | 9.9  |
| 2020-10-11 04:30 | 9.8  |
| 2020-10-11 04:40 | 9.4  |
| 2020-10-11 04:50 | 9.3  |
| 2020-10-11 05:00 | 9    |
| 2020-10-11 05:20 | 9.4  |
| 2020-10-11 05:30 | 9.6  |
| 2020-10-11 05:40 | 10.1 |
| 2020-10-11 05:50 | 9.8  |
| 2020-10-11 06:00 | 9.7  |
| 2020-10-11 06:10 | 9.6  |
| 2020-10-11 06:20 | 9.6  |
| 2020-10-11 06:30 | 10.2 |
| 2020-10-11 06:40 | 10.4 |
| 2020-10-11 06:50 | 10.7 |
| 2020-10-11 07:00 | 11.4 |
| 2020-10-11 07:10 | 12.4 |
| 2020-10-11 07:20 | 13.3 |
| 2020-10-11 07:30 | 13.9 |
| 2020-10-11 07:40 | 14.3 |
| 2020-10-11 07:50 | 14.9 |
| 2020-10-11 08:00 | 15.3 |
| 2020-10-11 08:10 | 16.1 |
| 2020-10-11 08:30 | 17.2 |
| 2020-10-11 08:40 | 17.7 |
| 2020-10-11 08:50 | 18.7 |



|                  |      |
|------------------|------|
| 2020-10-11 09:00 | 19.1 |
| 2020-10-11 09:10 | 19.3 |
| 2020-10-11 09:20 | 19.8 |
| 2020-10-11 09:30 | 21.1 |
| 2020-10-11 09:40 | 21.3 |
| 2020-10-11 09:50 | 21.4 |
| 2020-10-11 10:00 | 21.7 |
| 2020-10-11 10:10 | 21.8 |
| 2020-10-11 10:30 | 22.8 |
| 2020-10-11 10:40 | 23.2 |
| 2020-10-11 10:50 | 23.4 |
| 2020-10-11 11:00 | 24.4 |
| 2020-10-11 11:10 | 25.2 |
| 2020-10-11 11:20 | 24.9 |
| 2020-10-11 11:30 | 24.5 |
| 2020-10-11 11:50 | 26.1 |
| 2020-10-11 12:00 | 26.7 |
| 2020-10-11 12:10 | 26   |
| 2020-10-11 12:20 | 26.5 |
| 2020-10-11 12:30 | 26.1 |
| 2020-10-11 12:40 | 26.6 |
| 2020-10-11 12:50 | 27.6 |
| 2020-10-11 13:00 | 27.6 |
| 2020-10-11 13:10 | 28.3 |
| 2020-10-11 13:20 | 28.6 |
| 2020-10-11 13:30 | 28.8 |
| 2020-10-11 13:40 | 29.9 |
| 2020-10-11 13:50 | 28.9 |
| 2020-10-11 14:00 | 30.4 |
| 2020-10-11 14:10 | 29.9 |
| 2020-10-11 14:20 | 28.4 |
| 2020-10-11 14:40 | 31.6 |
| 2020-10-11 15:00 | 30.4 |
| 2020-10-11 15:10 | 28.4 |
| 2020-10-11 15:20 | 31.1 |
| 2020-10-11 15:30 | 32.3 |
| 2020-10-11 15:40 | 31.5 |
| 2020-10-11 15:50 | 29.8 |
| 2020-10-11 16:00 | 31.6 |
| 2020-10-11 16:10 | 29.2 |
| 2020-10-11 16:20 | 29.2 |
| 2020-10-11 16:30 | 30.1 |
| 2020-10-11 16:40 | 30.9 |
| 2020-10-11 16:50 | 29.7 |
| 2020-10-11 17:00 | 28.8 |
| 2020-10-11 17:10 | 28.8 |
| 2020-10-11 17:20 | 28.7 |
| 2020-10-11 17:30 | 29.7 |
| 2020-10-11 17:40 | 28.8 |
| 2020-10-11 17:50 | 28.5 |



|                  |      |
|------------------|------|
| 2020-10-11 18:00 | 27.6 |
| 2020-10-11 18:10 | 25.8 |
| 2020-10-11 18:20 | 24.4 |
| 2020-10-11 18:30 | 23.9 |
| 2020-10-11 18:40 | 23.4 |
| 2020-10-11 19:00 | 22.9 |
| 2020-10-11 19:10 | 22.7 |
| 2020-10-11 19:20 | 22.6 |
| 2020-10-11 19:30 | 22.3 |
| 2020-10-11 19:40 | 22.2 |
| 2020-10-11 19:50 | 21.9 |
| 2020-10-11 20:10 | 20.6 |
| 2020-10-11 20:20 | 20.4 |
| 2020-10-11 20:30 | 20.1 |
| 2020-10-11 20:40 | 20   |
| 2020-10-11 20:50 | 19.6 |
| 2020-10-11 21:00 | 19   |
| 2020-10-11 21:10 | 19.1 |
| 2020-10-11 21:20 | 19.7 |
| 2020-10-11 21:30 | 20.3 |
| 2020-10-11 21:40 | 20.4 |
| 2020-10-11 21:50 | 20.3 |
| 2020-10-11 22:00 | 20.3 |
| 2020-10-11 22:10 | 19.6 |
| 2020-10-11 22:20 | 18.8 |
| 2020-10-11 22:30 | 18.1 |
| 2020-10-11 22:40 | 18.2 |
| 2020-10-11 22:50 | 19.1 |
| 2020-10-11 23:00 | 19.8 |
| 2020-10-11 23:10 | 19.8 |
| 2020-10-11 23:20 | 19.4 |
| 2020-10-11 23:30 | 18.9 |
| 2020-10-11 23:40 | 18.9 |
| 2020-10-11 23:50 | 18.1 |
| 2020-10-12 00:00 | 16.6 |
| 2020-10-12 00:10 | 16.1 |
| 2020-10-12 00:20 | 15.9 |
| 2020-10-12 00:30 | 16.1 |
| 2020-10-12 00:40 | 16.3 |
| 2020-10-12 00:50 | 16.3 |
| 2020-10-12 01:00 | 16.2 |
| 2020-10-12 01:10 | 15.9 |
| 2020-10-12 01:20 | 16.3 |
| 2020-10-12 01:30 | 16.3 |
| 2020-10-12 01:40 | 16.1 |
| 2020-10-12 01:50 | 16.1 |
| 2020-10-12 02:00 | 15.9 |
| 2020-10-12 02:20 | 15.8 |
| 2020-10-12 02:30 | 15.5 |
| 2020-10-12 02:40 | 15.3 |



|                  |      |
|------------------|------|
| 2020-10-12 02:50 | 15.1 |
| 2020-10-12 03:00 | 15.2 |
| 2020-10-12 03:10 | 15.1 |
| 2020-10-12 03:20 | 15   |
| 2020-10-12 03:30 | 14.9 |
| 2020-10-12 03:40 | 14.8 |
| 2020-10-12 03:50 | 13.6 |
| 2020-10-12 04:00 | 13.3 |
| 2020-10-12 04:10 | 13.8 |
| 2020-10-12 04:20 | 13.6 |
| 2020-10-12 04:30 | 14   |
| 2020-10-12 04:50 | 14.2 |
| 2020-10-12 05:00 | 14.1 |
| 2020-10-12 05:10 | 14   |
| 2020-10-12 05:20 | 13.9 |
| 2020-10-12 05:30 | 13.7 |
| 2020-10-12 05:40 | 13.8 |
| 2020-10-12 05:50 | 13.9 |
| 2020-10-12 06:00 | 14.1 |
| 2020-10-12 06:10 | 13.5 |
| 2020-10-12 06:20 | 13.6 |
| 2020-10-12 06:30 | 13.1 |
| 2020-10-12 06:40 | 13.8 |
| 2020-10-12 06:50 | 13.9 |
| 2020-10-12 07:00 | 15.4 |
| 2020-10-12 07:10 | 16.8 |
| 2020-10-12 07:20 | 17.6 |
| 2020-10-12 07:30 | 17.5 |
| 2020-10-12 07:40 | 17.9 |
| 2020-10-12 07:50 | 18.4 |
| 2020-10-12 08:00 | 18.8 |
| 2020-10-12 08:10 | 18.9 |
| 2020-10-12 08:20 | 19.9 |
| 2020-10-12 08:30 | 20.9 |
| 2020-10-12 08:40 | 22.1 |
| 2020-10-12 08:50 | 23.3 |
| 2020-10-12 09:00 | 23.1 |
| 2020-10-12 09:10 | 24.4 |
| 2020-10-12 09:20 | 24.2 |
| 2020-10-12 09:30 | 24.8 |
| 2020-10-12 09:40 | 24   |
| 2020-10-12 09:50 | 24.9 |
| 2020-10-12 10:00 | 25.1 |
| 2020-10-12 10:10 | 26.2 |
| 2020-10-12 10:20 | 26.5 |
| 2020-10-12 10:30 | 26.8 |
| 2020-10-12 10:40 | 26.1 |
| 2020-10-12 10:50 | 27.4 |
| 2020-10-12 11:00 | 27.9 |
| 2020-10-12 11:10 | 28.9 |



|                  |      |
|------------------|------|
| 2020-10-12 11:20 | 28.7 |
| 2020-10-12 11:30 | 29.1 |
| 2020-10-12 11:40 | 28.3 |
| 2020-10-12 11:50 | 28.6 |
| 2020-10-12 12:00 | 29.6 |
| 2020-10-12 12:10 | 29.6 |
| 2020-10-12 12:20 | 29.7 |
| 2020-10-12 12:30 | 30.4 |
| 2020-10-12 12:40 | 30.1 |
| 2020-10-12 12:50 | 30.4 |
| 2020-10-12 13:00 | 30.6 |
| 2020-10-12 13:10 | 30.1 |
| 2020-10-12 13:20 | 30.7 |
| 2020-10-12 13:30 | 30.4 |
| 2020-10-12 13:40 | 30.6 |
| 2020-10-12 13:50 | 30.9 |
| 2020-10-12 14:00 | 30.1 |
| 2020-10-12 14:10 | 30.5 |
| 2020-10-12 14:30 | 30.8 |
| 2020-10-12 14:40 | 31.6 |
| 2020-10-12 14:50 | 29.9 |
| 2020-10-12 15:00 | 30.9 |
| 2020-10-12 15:10 | 30.4 |
| 2020-10-12 15:20 | 30.3 |
| 2020-10-12 15:30 | 30.9 |
| 2020-10-12 15:50 | 31.3 |
| 2020-10-12 16:00 | 31.3 |
| 2020-10-12 16:10 | 29.9 |
| 2020-10-12 16:20 | 30.4 |
| 2020-10-12 16:30 | 29.9 |
| 2020-10-12 16:40 | 30   |
| 2020-10-12 16:50 | 29.4 |
| 2020-10-12 17:00 | 29.3 |
| 2020-10-12 17:10 | 29.1 |
| 2020-10-12 17:20 | 29   |
| 2020-10-12 17:30 | 28.8 |
| 2020-10-12 17:40 | 28.5 |
| 2020-10-12 17:50 | 28.3 |
| 2020-10-12 18:00 | 27.5 |
| 2020-10-12 18:10 | 26.8 |
| 2020-10-12 18:20 | 26.3 |
| 2020-10-12 18:40 | 25.3 |
| 2020-10-12 18:50 | 24.7 |
| 2020-10-12 19:00 | 24.2 |
| 2020-10-12 19:10 | 23.9 |
| 2020-10-12 19:20 | 23.6 |
| 2020-10-12 19:30 | 23.4 |
| 2020-10-12 19:40 | 22.9 |
| 2020-10-12 20:00 | 22.3 |
| 2020-10-12 20:10 | 22   |



|                  |      |
|------------------|------|
| 2020-10-12 20:20 | 21.8 |
| 2020-10-12 20:30 | 21.5 |
| 2020-10-12 20:40 | 21.3 |
| 2020-10-12 20:50 | 20.9 |
| 2020-10-12 21:00 | 20.8 |
| 2020-10-12 21:10 | 20.5 |
| 2020-10-12 21:20 | 20.3 |
| 2020-10-12 21:30 | 19.9 |
| 2020-10-12 21:40 | 19.7 |
| 2020-10-12 21:50 | 19.4 |
| 2020-10-12 22:00 | 19.6 |
| 2020-10-12 22:10 | 19.4 |
| 2020-10-12 22:20 | 19.1 |
| 2020-10-12 22:30 | 18.9 |
| 2020-10-12 22:40 | 18.8 |
| 2020-10-12 22:50 | 18.4 |
| 2020-10-12 23:00 | 18.7 |
| 2020-10-12 23:10 | 18.6 |
| 2020-10-12 23:20 | 18.4 |
| 2020-10-12 23:30 | 18.3 |
| 2020-10-12 23:40 | 18   |
| 2020-10-12 23:50 | 18.1 |
| 2020-10-13 00:00 | 18.1 |
| 2020-10-13 00:10 | 17.9 |
| 2020-10-13 00:20 | 17.7 |
| 2020-10-13 00:30 | 17.4 |
| 2020-10-13 00:40 | 17.4 |
| 2020-10-13 00:50 | 17.3 |
| 2020-10-13 01:00 | 17.3 |
| 2020-10-13 01:10 | 16.9 |
| 2020-10-13 01:20 | 16.8 |
| 2020-10-13 01:30 | 16.6 |
| 2020-10-13 01:40 | 16.3 |
| 2020-10-13 01:50 | 15.9 |
| 2020-10-13 02:00 | 15.9 |
| 2020-10-13 02:10 | 15.6 |
| 2020-10-13 02:20 | 15.2 |
| 2020-10-13 02:30 | 15.3 |
| 2020-10-13 02:40 | 15.3 |
| 2020-10-13 02:50 | 14.9 |
| 2020-10-13 03:00 | 14.4 |
| 2020-10-13 03:10 | 14.8 |
| 2020-10-13 03:20 | 14.7 |
| 2020-10-13 03:30 | 14.4 |
| 2020-10-13 03:40 | 14.1 |
| 2020-10-13 03:50 | 14.4 |
| 2020-10-13 04:00 | 13.9 |
| 2020-10-13 04:10 | 13.6 |
| 2020-10-13 04:20 | 13.9 |
| 2020-10-13 04:30 | 13.3 |



|                  |      |
|------------------|------|
| 2020-10-13 04:40 | 12.8 |
| 2020-10-13 04:50 | 13   |
| 2020-10-13 05:00 | 13   |
| 2020-10-13 05:10 | 12.8 |
| 2020-10-13 05:20 | 12.4 |
| 2020-10-13 05:30 | 12.3 |
| 2020-10-13 05:40 | 12.4 |
| 2020-10-13 05:50 | 12.6 |
| 2020-10-13 06:00 | 12.8 |
| 2020-10-13 06:10 | 13.1 |
| 2020-10-13 06:20 | 13.3 |
| 2020-10-13 06:30 | 13.7 |
| 2020-10-13 06:40 | 14.1 |
| 2020-10-13 06:50 | 14.6 |
| 2020-10-13 07:00 | 15.6 |
| 2020-10-13 07:10 | 16.4 |
| 2020-10-13 07:20 | 17.3 |
| 2020-10-13 07:40 | 18.5 |
| 2020-10-13 07:50 | 19.2 |
| 2020-10-13 08:00 | 19.6 |
| 2020-10-13 08:10 | 20.3 |
| 2020-10-13 08:20 | 21   |
| 2020-10-13 08:30 | 21.9 |
| 2020-10-13 08:40 | 22.4 |
| 2020-10-13 08:50 | 22.1 |
| 2020-10-13 09:00 | 22.2 |
| 2020-10-13 09:10 | 23.3 |
| 2020-10-13 09:20 | 24.6 |
| 2020-10-13 09:30 | 25.1 |
| 2020-10-13 09:40 | 24.3 |
| 2020-10-13 09:50 | 24.7 |
| 2020-10-13 10:00 | 25.1 |
| 2020-10-13 10:10 | 25.4 |
| 2020-10-13 10:20 | 25.2 |
| 2020-10-13 10:30 | 25.5 |
| 2020-10-13 10:40 | 26.6 |
| 2020-10-13 10:50 | 26.3 |
| 2020-10-13 11:00 | 25.9 |
| 2020-10-13 11:10 | 27   |
| 2020-10-13 11:20 | 27.2 |
| 2020-10-13 11:30 | 27.3 |
| 2020-10-13 11:40 | 27.3 |
| 2020-10-13 11:50 | 27.9 |
| 2020-10-13 12:00 | 27.9 |
| 2020-10-13 12:10 | 28.5 |
| 2020-10-13 12:20 | 29.8 |
| 2020-10-13 12:30 | 28.7 |
| 2020-10-13 12:40 | 28.2 |
| 2020-10-13 12:50 | 29.7 |
| 2020-10-13 13:00 | 29.2 |



|                  |      |
|------------------|------|
| 2020-10-13 13:20 | 29.9 |
| 2020-10-13 13:30 | 30.2 |
| 2020-10-13 13:40 | 29.3 |
| 2020-10-13 13:50 | 30.9 |
| 2020-10-13 14:00 | 29.8 |
| 2020-10-13 14:10 | 29.5 |
| 2020-10-13 14:20 | 29.9 |
| 2020-10-13 14:30 | 30.4 |
| 2020-10-13 14:40 | 29.8 |
| 2020-10-13 14:50 | 29.7 |
| 2020-10-13 15:00 | 29.9 |
| 2020-10-13 15:10 | 30.8 |
| 2020-10-13 15:20 | 29.7 |
| 2020-10-13 15:30 | 29.4 |
| 2020-10-13 15:40 | 30.3 |
| 2020-10-13 15:50 | 29.8 |
| 2020-10-13 16:00 | 28.7 |
| 2020-10-13 16:10 | 29.2 |
| 2020-10-13 16:20 | 27.6 |
| 2020-10-13 16:30 | 28.4 |
| 2020-10-13 16:40 | 28.8 |
| 2020-10-13 16:50 | 27.4 |
| 2020-10-13 17:00 | 28.2 |
| 2020-10-13 17:10 | 28.4 |
| 2020-10-13 17:20 | 28.6 |
| 2020-10-13 17:30 | 27.9 |
| 2020-10-13 17:40 | 27.3 |
| 2020-10-13 17:50 | 26.9 |
| 2020-10-13 18:00 | 26.4 |
| 2020-10-13 18:10 | 25.4 |
| 2020-10-13 18:20 | 24.8 |
| 2020-10-13 18:30 | 24.3 |
| 2020-10-13 18:40 | 23.3 |
| 2020-10-13 18:50 | 22.7 |
| 2020-10-13 19:00 | 22.3 |
| 2020-10-13 19:10 | 22   |
| 2020-10-13 19:20 | 21.1 |
| 2020-10-13 19:40 | 20.4 |
| 2020-10-13 19:50 | 20.2 |
| 2020-10-13 20:10 | 19.8 |
| 2020-10-13 20:20 | 19.4 |
| 2020-10-13 20:30 | 19.1 |
| 2020-10-13 20:40 | 19   |
| 2020-10-13 20:50 | 19   |
| 2020-10-13 21:00 | 18.8 |
| 2020-10-13 21:10 | 18.5 |
| 2020-10-13 21:20 | 18.3 |
| 2020-10-13 21:30 | 18.9 |
| 2020-10-13 21:40 | 18.6 |
| 2020-10-13 21:50 | 18.4 |



|                  |      |
|------------------|------|
| 2020-10-13 22:00 | 18.1 |
| 2020-10-13 22:10 | 18.2 |
| 2020-10-13 22:20 | 17.8 |
| 2020-10-13 22:30 | 17.8 |
| 2020-10-13 22:40 | 17.6 |
| 2020-10-13 22:50 | 17.4 |
| 2020-10-13 23:00 | 17.1 |
| 2020-10-13 23:10 | 17.1 |
| 2020-10-13 23:20 | 16.9 |
| 2020-10-13 23:30 | 16.8 |
| 2020-10-13 23:40 | 16.6 |
| 2020-10-13 23:50 | 16.4 |
| 2020-10-14 00:00 | 16.3 |
| 2020-10-14 00:10 | 16.3 |
| 2020-10-14 00:20 | 16.1 |
| 2020-10-14 00:30 | 15.9 |
| 2020-10-14 00:40 | 15.7 |
| 2020-10-14 00:50 | 15.8 |
| 2020-10-14 01:00 | 15.6 |
| 2020-10-14 01:10 | 15.4 |
| 2020-10-14 01:20 | 15.3 |
| 2020-10-14 01:30 | 15.3 |
| 2020-10-14 01:40 | 15.1 |
| 2020-10-14 01:50 | 14.7 |
| 2020-10-14 02:00 | 14.6 |
| 2020-10-14 02:10 | 14.6 |
| 2020-10-14 02:20 | 14.3 |
| 2020-10-14 02:30 | 14.2 |
| 2020-10-14 02:40 | 14.1 |
| 2020-10-14 07:40 | 18.1 |
| 2020-10-14 07:50 | 18.1 |
| 2020-10-14 08:00 | 18.6 |
| 2020-10-14 08:10 | 19.6 |
| 2020-10-14 08:20 | 19.7 |
| 2020-10-14 08:30 | 20.8 |
| 2020-10-14 08:40 | 21.8 |
| 2020-10-14 08:50 | 21.8 |
| 2020-10-14 09:00 | 22.1 |
| 2020-10-14 09:10 | 22.6 |
| 2020-10-14 09:20 | 23.9 |
| 2020-10-14 09:30 | 24.7 |
| 2020-10-14 09:40 | 25.1 |
| 2020-10-14 09:50 | 24.8 |
| 2020-10-14 10:00 | 25.5 |
| 2020-10-14 10:10 | 25.6 |
| 2020-10-14 10:20 | 26.1 |
| 2020-10-14 10:30 | 26.4 |
| 2020-10-14 10:40 | 27.2 |
| 2020-10-14 10:50 | 27.2 |
| 2020-10-14 11:00 | 28.3 |



|                  |      |
|------------------|------|
| 2020-10-14 11:10 | 28.9 |
| 2020-10-14 11:20 | 30.1 |
| 2020-10-14 11:30 | 30.5 |
| 2020-10-14 11:40 | 31.3 |
| 2020-10-14 11:50 | 30.8 |
| 2020-10-14 12:00 | 31.1 |
| 2020-10-14 12:10 | 30.7 |
| 2020-10-14 12:20 | 31.2 |
| 2020-10-14 12:30 | 32.2 |
| 2020-10-14 12:40 | 33.1 |
| 2020-10-14 12:50 | 32.6 |
| 2020-10-14 13:00 | 30.9 |
| 2020-10-14 13:10 | 31.9 |
| 2020-10-14 13:20 | 32.9 |
| 2020-10-14 13:30 | 32   |
| 2020-10-14 13:40 | 32.6 |
| 2020-10-14 13:50 | 31.9 |
| 2020-10-14 14:00 | 32.1 |
| 2020-10-14 14:10 | 31.3 |
| 2020-10-14 14:20 | 30.6 |
| 2020-10-14 14:30 | 30.4 |
| 2020-10-14 14:40 | 29.7 |
| 2020-10-14 14:50 | 29.1 |
| 2020-10-14 15:00 | 28.8 |
| 2020-10-14 15:10 | 28.7 |
| 2020-10-14 15:20 | 28.3 |
| 2020-10-14 15:30 | 28.3 |
| 2020-10-14 15:40 | 28.3 |
| 2020-10-14 15:50 | 28.1 |
| 2020-10-14 16:00 | 28.1 |
| 2020-10-14 16:10 | 27.7 |
| 2020-10-14 16:20 | 27.4 |
| 2020-10-14 16:30 | 27.2 |
| 2020-10-14 16:40 | 26.8 |
| 2020-10-14 16:50 | 26.7 |
| 2020-10-14 17:00 | 26.4 |
| 2020-10-14 17:10 | 26   |
| 2020-10-14 17:20 | 25.6 |
| 2020-10-14 17:30 | 25.3 |
| 2020-10-14 17:40 | 24.9 |
| 2020-10-14 17:50 | 24.8 |
| 2020-10-14 18:00 | 24.4 |
| 2020-10-14 18:10 | 24.3 |
| 2020-10-14 18:20 | 23.6 |
| 2020-10-14 18:30 | 23.1 |
| 2020-10-14 18:40 | 22.9 |
| 2020-10-14 18:50 | 22.7 |
| 2020-10-14 19:00 | 22.6 |
| 2020-10-14 19:10 | 22.4 |
| 2020-10-14 19:20 | 22.4 |



|                  |      |
|------------------|------|
| 2020-10-14 19:30 | 22.3 |
| 2020-10-14 19:40 | 22.1 |
| 2020-10-14 19:50 | 21.8 |
| 2020-10-14 20:00 | 21.6 |
| 2020-10-14 20:10 | 21.4 |
| 2020-10-14 20:20 | 21.3 |
| 2020-10-14 20:30 | 21.1 |
| 2020-10-14 20:40 | 20.9 |
| 2020-10-14 20:40 | 20.9 |
| 2020-10-14 20:50 | 20.8 |
| 2020-10-14 21:00 | 20.5 |
| 2020-10-14 21:10 | 20.3 |
| 2020-10-14 21:20 | 20.2 |
| 2020-10-14 21:30 | 20.1 |
| 2020-10-14 21:40 | 19.9 |
| 2020-10-14 21:50 | 19.9 |
| 2020-10-14 22:00 | 19.7 |
| 2020-10-14 22:10 | 19.6 |
| 2020-10-14 22:20 | 19.5 |
| 2020-10-14 22:30 | 19.4 |
| 2020-10-14 22:40 | 19.3 |
| 2020-10-14 22:50 | 19.3 |
| 2020-10-14 23:00 | 19.2 |
| 2020-10-14 23:10 | 18.9 |
| 2020-10-14 23:20 | 18.6 |
| 2020-10-14 23:30 | 18.1 |
| 2020-10-14 23:40 | 18.1 |
| 2020-10-14 23:50 | 17.9 |
| 2020-10-15 00:00 | 18.1 |
| 2020-10-15 00:10 | 17.9 |
| 2020-10-15 00:20 | 17.6 |
| 2020-10-15 00:30 | 17.4 |
| 2020-10-15 00:40 | 17.4 |
| 2020-10-15 00:50 | 17.5 |
| 2020-10-15 01:00 | 17.4 |
| 2020-10-15 01:10 | 17.3 |
| 2020-10-15 01:20 | 17.3 |
| 2020-10-15 01:30 | 17.2 |
| 2020-10-15 01:40 | 17.1 |
| 2020-10-15 01:50 | 17   |
| 2020-10-15 02:00 | 16.8 |
| 2020-10-15 02:10 | 16.4 |
| 2020-10-15 02:20 | 16.3 |
| 2020-10-15 02:30 | 16   |
| 2020-10-15 02:40 | 15.8 |
| 2020-10-15 02:50 | 15.6 |
| 2020-10-15 03:00 | 15.5 |
| 2020-10-15 03:10 | 15.4 |
| 2020-10-15 03:20 | 15.4 |
| 2020-10-15 03:30 | 15.3 |



|                  |      |
|------------------|------|
| 2020-10-15 03:40 | 15.4 |
| 2020-10-15 03:50 | 15.4 |
| 2020-10-15 04:00 | 15.4 |
| 2020-10-15 04:10 | 15.4 |
| 2020-10-15 04:20 | 15.3 |
| 2020-10-15 04:30 | 15.1 |
| 2020-10-15 04:40 | 14.9 |
| 2020-10-15 04:50 | 14.8 |
| 2020-10-15 05:00 | 14.8 |
| 2020-10-15 05:10 | 14.6 |
| 2020-10-15 05:20 | 14.6 |
| 2020-10-15 05:30 | 14.4 |
| 2020-10-15 05:40 | 14.3 |
| 2020-10-15 05:50 | 14.2 |
| 2020-10-15 06:00 | 14.2 |
| 2020-10-15 06:10 | 14.4 |
| 2020-10-15 06:20 | 14.6 |
| 2020-10-15 06:30 | 14.8 |
| 2020-10-15 06:40 | 14.9 |
| 2020-10-15 06:50 | 15.1 |
| 2020-10-15 07:00 | 15   |
| 2020-10-15 07:10 | 15.5 |
| 2020-10-15 07:20 | 15.9 |
| 2020-10-15 07:30 | 15.8 |
| 2020-10-15 07:40 | 16   |
| 2020-10-15 07:50 | 16.3 |
| 2020-10-15 08:00 | 16.6 |
| 2020-10-15 08:10 | 17   |
| 2020-10-15 08:20 | 17.5 |
| 2020-10-15 08:30 | 17.9 |
| 2020-10-15 08:40 | 18.6 |
| 2020-10-15 08:50 | 18.9 |
| 2020-10-15 09:00 | 19   |
| 2020-10-15 09:10 | 19.9 |
| 2020-10-15 09:20 | 20.4 |
| 2020-10-15 09:30 | 21.5 |
| 2020-10-15 09:40 | 21.8 |
| 2020-10-15 09:50 | 22.5 |
| 2020-10-15 10:00 | 23.2 |
| 2020-10-15 10:10 | 23.8 |
| 2020-10-15 10:20 | 24.9 |
| 2020-10-15 10:30 | 24.7 |
| 2020-10-15 10:40 | 25.3 |
| 2020-10-15 10:50 | 26.3 |
| 2020-10-15 11:00 | 25.9 |
| 2020-10-15 11:10 | 25.8 |
| 2020-10-15 11:20 | 26.8 |
| 2020-10-15 11:30 | 26.8 |
| 2020-10-15 11:40 | 27.1 |
| 2020-10-15 11:50 | 27.8 |



|                  |      |
|------------------|------|
| 2020-10-15 12:00 | 27.9 |
| 2020-10-15 12:10 | 28.3 |
| 2020-10-15 12:20 | 28.6 |
| 2020-10-15 12:30 | 28.4 |
| 2020-10-15 12:40 | 28.6 |
| 2020-10-15 12:50 | 29.4 |
| 2020-10-15 13:00 | 29.2 |
| 2020-10-15 13:10 | 29.8 |
| 2020-10-15 13:20 | 30.6 |
| 2020-10-15 13:30 | 30.5 |
| 2020-10-15 13:40 | 30.9 |
| 2020-10-15 13:50 | 30.9 |
| 2020-10-15 14:00 | 30.6 |
| 2020-10-15 14:10 | 30.1 |
| 2020-10-15 14:20 | 30.4 |
| 2020-10-15 14:30 | 30.5 |
| 2020-10-15 14:40 | 30.9 |
| 2020-10-15 14:50 | 30.9 |
| 2020-10-15 15:00 | 31.1 |
| 2020-10-15 15:10 | 30.8 |
| 2020-10-15 15:20 | 30.9 |
| 2020-10-15 15:30 | 30.6 |
| 2020-10-15 15:40 | 31.3 |
| 2020-10-15 15:50 | 30.1 |
| 2020-10-15 16:00 | 30.6 |
| 2020-10-15 16:10 | 30.7 |
| 2020-10-15 16:20 | 30.7 |
| 2020-10-15 16:30 | 30.4 |
| 2020-10-15 16:40 | 30.2 |
| 2020-10-15 16:50 | 30.4 |
| 2020-10-15 17:00 | 29.9 |
| 2020-10-15 17:10 | 29.3 |
| 2020-10-15 17:20 | 28.5 |
| 2020-10-15 17:30 | 28.6 |
| 2020-10-15 17:40 | 27.6 |
| 2020-10-15 17:50 | 27.2 |
| 2020-10-15 18:00 | 27.5 |
| 2020-10-15 18:10 | 26.7 |
| 2020-10-15 18:20 | 26   |
| 2020-10-15 18:30 | 25.4 |
| 2020-10-15 18:40 | 24.8 |
| 2020-10-15 18:50 | 24.3 |
| 2020-10-15 19:00 | 23.8 |
| 2020-10-15 19:10 | 23.4 |
| 2020-10-15 19:20 | 23.3 |
| 2020-10-15 19:30 | 23.2 |
| 2020-10-15 19:40 | 22.6 |
| 2020-10-15 19:50 | 22   |
| 2020-10-15 20:00 | 21.8 |
| 2020-10-15 20:10 | 21.6 |



|                  |      |
|------------------|------|
| 2020-10-15 20:20 | 21.4 |
| 2020-10-15 20:30 | 21   |
| 2020-10-15 20:40 | 20.6 |
| 2020-10-15 20:50 | 20.6 |
| 2020-10-15 21:00 | 20.4 |
| 2020-10-15 21:10 | 20.2 |
| 2020-10-15 21:20 | 19.9 |
| 2020-10-15 21:30 | 19.8 |
| 2020-10-15 21:40 | 19.4 |
| 2020-10-15 21:50 | 19.4 |
| 2020-10-15 22:00 | 19.2 |
| 2020-10-15 22:10 | 18.9 |
| 2020-10-15 22:20 | 18.6 |
| 2020-10-15 22:30 | 18.2 |
| 2020-10-15 22:40 | 17.9 |
| 2020-10-15 22:50 | 17.8 |
| 2020-10-15 23:00 | 17.6 |
| 2020-10-15 23:10 | 17.2 |
| 2020-10-15 23:20 | 17.3 |
| 2020-10-15 23:30 | 17.4 |
| 2020-10-15 23:40 | 17.4 |
| 2020-10-15 23:50 | 17.3 |
| 2020-10-16 00:00 | 17.2 |
| 2020-10-16 00:10 | 17.1 |
| 2020-10-16 00:20 | 17   |
| 2020-10-16 00:30 | 16.9 |
| 2020-10-16 00:40 | 16.8 |
| 2020-10-16 00:50 | 16.7 |
| 2020-10-16 01:00 | 16.6 |
| 2020-10-16 01:10 | 16.3 |
| 2020-10-16 01:20 | 16.3 |
| 2020-10-16 01:30 | 16.4 |
| 2020-10-16 01:40 | 16.3 |
| 2020-10-16 01:50 | 15.9 |
| 2020-10-16 02:00 | 15.8 |
| 2020-10-16 02:10 | 15.6 |
| 2020-10-16 02:20 | 15.4 |
| 2020-10-16 02:30 | 15.3 |
| 2020-10-16 02:40 | 15   |
| 2020-10-16 02:50 | 14.9 |
| 2020-10-16 03:00 | 14.8 |
| 2020-10-16 03:10 | 14.7 |
| 2020-10-16 03:20 | 14.6 |
| 2020-10-16 03:30 | 14.5 |
| 2020-10-16 03:40 | 14.3 |
| 2020-10-16 03:50 | 14.1 |
| 2020-10-16 04:00 | 13.9 |
| 2020-10-16 04:10 | 13.8 |
| 2020-10-16 04:20 | 13.5 |
| 2020-10-16 04:30 | 13.3 |



|                  |      |
|------------------|------|
| 2020-10-16 04:40 | 13.3 |
| 2020-10-16 04:50 | 13.1 |
| 2020-10-16 05:00 | 13   |
| 2020-10-16 05:10 | 12.9 |
| 2020-10-16 05:20 | 12.8 |
| 2020-10-16 05:30 | 12.8 |
| 2020-10-16 05:40 | 12.8 |
| 2020-10-16 05:50 | 12.8 |
| 2020-10-16 06:00 | 12.6 |
| 2020-10-16 06:10 | 12.6 |
| 2020-10-16 06:20 | 12.7 |
| 2020-10-16 06:30 | 12.8 |
| 2020-10-16 06:40 | 13   |
| 2020-10-16 06:50 | 13.4 |
| 2020-10-16 07:00 | 14.3 |
| 2020-10-16 07:10 | 14.9 |
| 2020-10-16 07:20 | 15.6 |
| 2020-10-16 07:30 | 15.9 |
| 2020-10-16 07:40 | 16.2 |
| 2020-10-16 07:50 | 17.1 |
| 2020-10-16 08:00 | 17.1 |
| 2020-10-16 08:10 | 17.8 |
| 2020-10-16 08:20 | 17.6 |
| 2020-10-16 08:30 | 18.7 |
| 2020-10-16 08:40 | 19.4 |
| 2020-10-16 08:50 | 20.1 |
| 2020-10-16 09:00 | 19.9 |
| 2020-10-16 09:10 | 19.4 |
| 2020-10-16 09:20 | 19.7 |
| 2020-10-16 09:30 | 20.4 |
| 2020-10-16 09:40 | 21   |
| 2020-10-16 09:50 | 21.3 |
| 2020-10-16 10:00 | 21.2 |
| 2020-10-16 10:10 | 22   |
| 2020-10-16 11:50 | 26.3 |
| 2020-10-16 12:00 | 26.1 |
| 2020-10-16 13:10 | 28.7 |
| 2020-10-16 13:20 | 28   |
| 2020-10-16 13:30 | 28.8 |
| 2020-10-16 13:40 | 28.9 |
| 2020-10-16 13:50 | 29.5 |
| 2020-10-16 14:00 | 29.6 |
| 2020-10-16 14:10 | 29.4 |
| 2020-10-16 14:20 | 29.4 |
| 2020-10-16 14:30 | 28.9 |
| 2020-10-16 14:40 | 29.7 |
| 2020-10-16 14:50 | 29.8 |
| 2020-10-16 15:00 | 30.1 |
| 2020-10-16 15:10 | 30.6 |
| 2020-10-16 15:20 | 29.4 |



|                  |      |
|------------------|------|
| 2020-10-16 15:30 | 29.8 |
| 2020-10-16 15:40 | 28.9 |
| 2020-10-16 15:50 | 29.4 |
| 2020-10-16 16:00 | 29.5 |
| 2020-10-16 16:10 | 29.8 |
| 2020-10-16 16:20 | 28.6 |
| 2020-10-16 16:30 | 28.1 |
| 2020-10-16 16:40 | 28.5 |
| 2020-10-16 16:50 | 28.6 |
| 2020-10-16 17:00 | 28.3 |
| 2020-10-16 17:10 | 28.3 |
| 2020-10-16 17:20 | 28.1 |
| 2020-10-16 17:30 | 27.4 |
| 2020-10-16 17:40 | 27.4 |
| 2020-10-16 17:50 | 26.7 |
| 2020-10-16 18:00 | 26.1 |
| 2020-10-16 18:10 | 25.1 |
| 2020-10-16 18:20 | 24.5 |
| 2020-10-16 18:30 | 23.9 |
| 2020-10-16 18:40 | 23.4 |
| 2020-10-16 18:50 | 23.1 |
| 2020-10-16 19:00 | 22.8 |
| 2020-10-16 19:10 | 22.4 |
| 2020-10-16 19:20 | 22.1 |
| 2020-10-16 19:30 | 21.6 |
| 2020-10-16 19:40 | 21.1 |
| 2020-10-16 19:50 | 20.9 |
| 2020-10-16 20:00 | 20.8 |
| 2020-10-16 20:10 | 20.9 |
| 2020-10-16 20:20 | 20.6 |
| 2020-10-16 20:30 | 20.6 |
| 2020-10-16 20:40 | 20.4 |
| 2020-10-16 20:50 | 20.1 |
| 2020-10-16 21:00 | 19.8 |
| 2020-10-16 21:10 | 19.6 |
| 2020-10-16 21:20 | 19.3 |
| 2020-10-16 21:30 | 19.1 |
| 2020-10-16 21:40 | 18.7 |
| 2020-10-16 21:50 | 18.5 |
| 2020-10-16 22:00 | 18.4 |
| 2020-10-16 22:10 | 18.1 |
| 2020-10-16 22:20 | 17.8 |
| 2020-10-16 22:30 | 17.7 |
| 2020-10-16 22:40 | 17.3 |
| 2020-10-16 22:50 | 17.1 |
| 2020-10-16 23:00 | 16.8 |
| 2020-10-16 23:10 | 16.6 |
| 2020-10-16 23:20 | 16.5 |
| 2020-10-16 23:30 | 16.6 |
| 2020-10-16 23:40 | 16.6 |



|                  |      |
|------------------|------|
| 2020-10-16 23:50 | 16.5 |
| 2020-10-17 00:00 | 16.3 |
| 2020-10-17 00:10 | 16.1 |
| 2020-10-17 00:20 | 15.9 |
| 2020-10-17 00:30 | 15.8 |
| 2020-10-17 00:40 | 15.6 |
| 2020-10-17 00:50 | 15.3 |
| 2020-10-17 01:00 | 15.1 |
| 2020-10-17 01:10 | 14.9 |
| 2020-10-17 01:20 | 14.9 |
| 2020-10-17 01:30 | 14.8 |
| 2020-10-17 01:40 | 14.4 |
| 2020-10-17 01:50 | 14.4 |
| 2020-10-17 02:00 | 14.3 |
| 2020-10-17 02:10 | 14.5 |
| 2020-10-17 02:20 | 14.3 |
| 2020-10-17 02:30 | 14.1 |
| 2020-10-17 02:40 | 13.8 |
| 2020-10-17 02:50 | 13.6 |
| 2020-10-17 03:00 | 13.4 |
| 2020-10-17 03:10 | 13.3 |
| 2020-10-17 03:20 | 13.1 |
| 2020-10-17 03:30 | 12.9 |
| 2020-10-17 03:40 | 12.6 |
| 2020-10-17 03:50 | 12.3 |
| 2020-10-17 04:00 | 12.2 |
| 2020-10-17 04:10 | 12   |
| 2020-10-17 04:20 | 11.7 |
| 2020-10-17 04:30 | 11.7 |
| 2020-10-17 04:40 | 11.8 |
| 2020-10-17 04:50 | 11.6 |
| 2020-10-17 05:00 | 11.4 |
| 2020-10-17 05:10 | 11.4 |
| 2020-10-17 05:20 | 11.3 |
| 2020-10-17 05:30 | 11.1 |
| 2020-10-17 05:40 | 10.9 |
| 2020-10-17 05:50 | 10.8 |
| 2020-10-17 06:00 | 10.8 |
| 2020-10-17 06:10 | 10.8 |
| 2020-10-17 06:20 | 10.9 |
| 2020-10-17 06:30 | 11.1 |
| 2020-10-17 06:40 | 11.3 |
| 2020-10-17 06:50 | 12.1 |
| 2020-10-17 07:00 | 12.9 |
| 2020-10-17 07:10 | 13.7 |
| 2020-10-17 07:20 | 13.6 |
| 2020-10-17 07:30 | 14   |
| 2020-10-17 07:40 | 14.3 |
| 2020-10-17 07:50 | 14.9 |
| 2020-10-17 08:00 | 15.8 |



|                  |      |
|------------------|------|
| 2020-10-17 08:10 | 16.3 |
| 2020-10-17 08:20 | 16.4 |
| 2020-10-17 08:30 | 17.1 |
| 2020-10-17 08:40 | 17.6 |
| 2020-10-17 08:50 | 17.9 |
| 2020-10-17 09:00 | 18.7 |
| 2020-10-17 09:10 | 18.1 |
| 2020-10-17 09:20 | 19.1 |
| 2020-10-17 09:30 | 19.6 |
| 2020-10-17 09:40 | 19.4 |
| 2020-10-17 09:50 | 19.9 |
| 2020-10-17 10:00 | 20.9 |
| 2020-10-17 10:10 | 22.1 |
| 2020-10-17 10:20 | 22.6 |
| 2020-10-17 10:30 | 22.9 |
| 2020-10-17 10:40 | 22.8 |
| 2020-10-17 10:50 | 22.9 |
| 2020-10-17 11:00 | 24.7 |
| 2020-10-17 11:10 | 24.2 |
| 2020-10-17 11:20 | 25.4 |
| 2020-10-17 11:30 | 26.2 |
| 2020-10-17 11:40 | 25.7 |
| 2020-10-17 11:50 | 25.4 |
| 2020-10-17 12:00 | 26.4 |
| 2020-10-17 12:10 | 27.3 |
| 2020-10-17 12:20 | 27.3 |
| 2020-10-17 12:30 | 27.6 |
| 2020-10-17 12:40 | 27.4 |
| 2020-10-17 12:50 | 28.1 |
| 2020-10-17 13:00 | 28.4 |
| 2020-10-17 13:10 | 28.6 |
| 2020-10-17 13:20 | 28.5 |
| 2020-10-17 13:30 | 27.5 |
| 2020-10-17 13:40 | 29.6 |
| 2020-10-17 13:50 | 30   |
| 2020-10-17 14:00 | 29.4 |
| 2020-10-17 14:10 | 29.6 |
| 2020-10-17 14:20 | 28.7 |
| 2020-10-17 14:30 | 28.1 |
| 2020-10-17 14:40 | 28.2 |
| 2020-10-17 14:50 | 28.4 |
| 2020-10-17 15:00 | 27.6 |
| 2020-10-17 15:10 | 27.8 |
| 2020-10-17 15:20 | 28.7 |
| 2020-10-17 15:30 | 27.2 |
| 2020-10-17 15:40 | 27.8 |
| 2020-10-17 15:50 | 27.7 |
| 2020-10-17 16:00 | 26.9 |
| 2020-10-17 16:10 | 26.4 |
| 2020-10-17 16:20 | 26.1 |



|                  |      |
|------------------|------|
| 2020-10-17 16:30 | 25.8 |
| 2020-10-17 16:40 | 25.6 |
| 2020-10-17 16:50 | 25.8 |
| 2020-10-17 17:00 | 25.4 |
| 2020-10-17 17:10 | 25.1 |
| 2020-10-17 17:20 | 24.9 |
| 2020-10-17 17:30 | 24.9 |
| 2020-10-17 17:40 | 24.6 |
| 2020-10-17 17:50 | 24.4 |
| 2020-10-17 18:00 | 24.1 |
| 2020-10-17 18:10 | 23.6 |
| 2020-10-17 18:20 | 23.2 |
| 2020-10-17 18:30 | 22.9 |
| 2020-10-17 18:40 | 22.9 |
| 2020-10-17 18:50 | 22.7 |
| 2020-10-17 19:00 | 22.6 |
| 2020-10-17 19:10 | 22.3 |
| 2020-10-17 19:20 | 22.2 |
| 2020-10-17 19:30 | 22.2 |
| 2020-10-17 19:40 | 21.9 |
| 2020-10-17 19:50 | 21.9 |
| 2020-10-17 20:00 | 21.6 |
| 2020-10-17 20:10 | 21.4 |
| 2020-10-17 20:20 | 21.2 |
| 2020-10-17 20:30 | 20.9 |
| 2020-10-17 20:40 | 20.5 |
| 2020-10-17 20:50 | 20.3 |
| 2020-10-17 21:00 | 20   |
| 2020-10-17 21:10 | 19.8 |
| 2020-10-17 21:20 | 19.8 |
| 2020-10-17 21:30 | 19.5 |
| 2020-10-17 21:40 | 19.3 |
| 2020-10-17 21:50 | 19.3 |
| 2020-10-17 22:00 | 19.1 |
| 2020-10-17 22:10 | 18.9 |
| 2020-10-17 22:20 | 18.8 |
| 2020-10-17 22:30 | 18.6 |
| 2020-10-17 22:40 | 18.6 |
| 2020-10-17 22:50 | 18.3 |
| 2020-10-17 23:00 | 18.3 |
| 2020-10-17 23:10 | 18   |
| 2020-10-17 23:20 | 17.9 |
| 2020-10-17 23:30 | 17.8 |
| 2020-10-17 23:40 | 17.5 |
| 2020-10-17 23:50 | 17.4 |
| 2020-10-18 00:00 | 17.3 |
| 2020-10-18 00:10 | 17.1 |
| 2020-10-18 00:20 | 16.9 |
| 2020-10-18 00:30 | 16.8 |
| 2020-10-18 00:40 | 16.6 |



|                  |      |
|------------------|------|
| 2020-10-18 00:50 | 16.6 |
| 2020-10-18 01:00 | 16.3 |
| 2020-10-18 01:10 | 16   |
| 2020-10-18 01:20 | 15.9 |
| 2020-10-18 01:30 | 15.8 |
| 2020-10-18 01:40 | 15.6 |
| 2020-10-18 01:50 | 15.3 |
| 2020-10-18 02:00 | 15.1 |
| 2020-10-18 02:10 | 15   |
| 2020-10-18 02:20 | 14.9 |
| 2020-10-18 02:30 | 14.8 |
| 2020-10-18 02:40 | 14.6 |
| 2020-10-18 02:50 | 14.4 |
| 2020-10-18 03:00 | 14.1 |
| 2020-10-18 03:10 | 14   |
| 2020-10-18 03:20 | 13.8 |
| 2020-10-18 03:30 | 13.6 |
| 2020-10-18 03:40 | 13.4 |
| 2020-10-18 03:50 | 13.2 |
| 2020-10-18 04:00 | 13.2 |
| 2020-10-18 04:10 | 13.1 |
| 2020-10-18 04:20 | 13   |
| 2020-10-18 04:30 | 12.8 |
| 2020-10-18 04:40 | 12.8 |
| 2020-10-18 04:50 | 12.6 |
| 2020-10-18 05:00 | 12.4 |
| 2020-10-18 05:10 | 12   |
| 2020-10-18 05:20 | 11.9 |
| 2020-10-18 05:30 | 11.9 |
| 2020-10-18 05:50 | 11.9 |
| 2020-10-18 06:00 | 12   |
| 2020-10-18 06:10 | 12.1 |
| 2020-10-18 06:20 | 12.1 |
| 2020-10-18 06:30 | 12.3 |
| 2020-10-18 06:40 | 12.3 |
| 2020-10-18 06:50 | 13.6 |
| 2020-10-18 07:00 | 14.9 |
| 2020-10-18 07:10 | 15.3 |
| 2020-10-18 07:20 | 16.3 |
| 2020-10-18 07:30 | 16.4 |
| 2020-10-18 07:40 | 16.9 |
| 2020-10-18 07:50 | 16.6 |
| 2020-10-18 08:00 | 17.8 |
| 2020-10-18 08:10 | 17.5 |
| 2020-10-18 08:20 | 17.6 |
| 2020-10-18 08:30 | 18   |
| 2020-10-18 08:40 | 18.4 |
| 2020-10-18 08:50 | 19   |
| 2020-10-18 09:00 | 19.3 |
| 2020-10-18 09:10 | 19.5 |



|                  |      |
|------------------|------|
| 2020-10-18 09:20 | 20.1 |
| 2020-10-18 09:30 | 20.4 |
| 2020-10-18 09:40 | 20.6 |
| 2020-10-18 09:50 | 20.9 |
| 2020-10-18 10:00 | 22.1 |
| 2020-10-18 10:10 | 22.4 |
| 2020-10-18 10:20 | 23   |
| 2020-10-18 10:30 | 24.2 |
| 2020-10-18 10:40 | 24.1 |
| 2020-10-18 10:50 | 24.6 |
| 2020-10-18 11:00 | 24.8 |
| 2020-10-18 11:10 | 25.9 |
| 2020-10-18 11:20 | 25.9 |
| 2020-10-18 11:30 | 26.1 |
| 2020-10-18 11:40 | 26.6 |
| 2020-10-18 11:50 | 26.4 |
| 2020-10-18 12:00 | 27.3 |
| 2020-10-18 12:10 | 28.1 |
| 2020-10-18 12:20 | 28.9 |
| 2020-10-18 12:30 | 27.7 |
| 2020-10-18 12:40 | 28.8 |
| 2020-10-18 12:50 | 28.6 |
| 2020-10-18 13:00 | 29.5 |
| 2020-10-18 13:10 | 30.1 |
| 2020-10-18 13:20 | 30.4 |
| 2020-10-18 13:30 | 30.6 |
| 2020-10-18 13:40 | 29.3 |
| 2020-10-18 13:50 | 31.2 |
| 2020-10-18 14:00 | 30.9 |
| 2020-10-18 14:10 | 30.8 |
| 2020-10-18 14:20 | 31.1 |
| 2020-10-18 14:30 | 30.9 |
| 2020-10-18 14:40 | 32.3 |
| 2020-10-18 14:50 | 31.8 |
| 2020-10-18 15:00 | 31.4 |
| 2020-10-18 15:10 | 30.9 |
| 2020-10-18 15:20 | 32   |
| 2020-10-18 15:30 | 30.3 |
| 2020-10-18 15:40 | 31.4 |
| 2020-10-18 15:50 | 31.3 |
| 2020-10-18 16:00 | 31.6 |
| 2020-10-18 16:10 | 32.3 |
| 2020-10-18 16:20 | 31.4 |
| 2020-10-18 16:30 | 30.5 |
| 2020-10-18 16:40 | 30.9 |
| 2020-10-18 16:50 | 31.3 |
| 2020-10-18 17:00 | 30.6 |
| 2020-10-18 17:10 | 29.9 |
| 2020-10-18 17:20 | 29.6 |
| 2020-10-18 17:30 | 28.9 |



|                  |      |
|------------------|------|
| 2020-10-18 17:40 | 28.8 |
| 2020-10-18 17:50 | 28.3 |
| 2020-10-18 18:00 | 27.4 |
| 2020-10-18 18:10 | 26.1 |
| 2020-10-18 18:20 | 25.4 |
| 2020-10-18 18:30 | 24.8 |
| 2020-10-18 18:40 | 24.1 |
| 2020-10-18 18:50 | 23.8 |
| 2020-10-18 19:00 | 23.4 |
| 2020-10-18 19:10 | 23.1 |
| 2020-10-18 19:20 | 22.9 |
| 2020-10-18 19:30 | 22.9 |
| 2020-10-18 19:40 | 22.8 |
| 2020-10-18 19:50 | 22.9 |
| 2020-10-18 20:00 | 23.2 |
| 2020-10-18 20:10 | 22.8 |
| 2020-10-18 20:20 | 22.4 |
| 2020-10-18 20:30 | 22.3 |
| 2020-10-18 20:40 | 22.2 |
| 2020-10-18 20:50 | 21.8 |
| 2020-10-18 21:00 | 21.4 |
| 2020-10-18 21:10 | 21.3 |
| 2020-10-18 21:20 | 20.9 |
| 2020-10-18 21:30 | 20.6 |
| 2020-10-18 21:40 | 20.3 |
| 2020-10-18 21:50 | 20.1 |
| 2020-10-18 22:00 | 19.7 |
| 2020-10-18 22:10 | 19.6 |
| 2020-10-18 22:20 | 19.4 |
| 2020-10-18 22:30 | 19.1 |
| 2020-10-18 22:40 | 19.1 |
| 2020-10-18 22:50 | 18.9 |
| 2020-10-18 23:00 | 18.8 |
| 2020-10-18 23:10 | 18.6 |
| 2020-10-18 23:20 | 18.4 |
| 2020-10-18 23:30 | 18.4 |
| 2020-10-18 23:40 | 18.3 |
| 2020-10-18 23:50 | 18.1 |
| 2020-10-19 00:00 | 18   |
| 2020-10-19 00:10 | 17.8 |
| 2020-10-19 00:20 | 17.6 |
| 2020-10-19 00:30 | 17.4 |
| 2020-10-19 00:40 | 17.4 |
| 2020-10-19 00:50 | 17.2 |
| 2020-10-19 01:00 | 17.1 |
| 2020-10-19 01:10 | 17   |
| 2020-10-19 01:20 | 16.9 |
| 2020-10-19 01:30 | 16.8 |
| 2020-10-19 01:40 | 16.7 |
| 2020-10-19 01:50 | 16.6 |



|                  |      |
|------------------|------|
| 2020-10-19 02:00 | 16.4 |
| 2020-10-19 02:10 | 16.3 |
| 2020-10-19 02:20 | 16.3 |
| 2020-10-19 02:30 | 16.2 |
| 2020-10-19 02:40 | 16.1 |
| 2020-10-19 02:50 | 15.9 |
| 2020-10-19 03:00 | 15.8 |
| 2020-10-19 03:10 | 15.8 |
| 2020-10-19 03:20 | 15.7 |
| 2020-10-19 03:30 | 15.6 |
| 2020-10-19 03:40 | 15.4 |
| 2020-10-19 03:50 | 15.4 |
| 2020-10-19 04:00 | 15.4 |
| 2020-10-19 04:10 | 15.3 |
| 2020-10-19 04:20 | 15.2 |
| 2020-10-19 04:30 | 15.1 |
| 2020-10-19 04:40 | 15   |
| 2020-10-19 04:50 | 14.9 |
| 2020-10-19 05:00 | 14.8 |
| 2020-10-19 05:10 | 14.8 |
| 2020-10-19 05:20 | 14.6 |
| 2020-10-19 05:30 | 14.5 |
| 2020-10-19 05:40 | 14.4 |
| 2020-10-19 05:50 | 14.4 |
| 2020-10-19 06:00 | 14.4 |
| 2020-10-19 06:10 | 14.4 |
| 2020-10-19 06:20 | 14.5 |
| 2020-10-19 06:30 | 14.7 |
| 2020-10-19 06:40 | 15   |
| 2020-10-19 06:50 | 16   |
| 2020-10-19 07:00 | 16.5 |
| 2020-10-19 07:10 | 17.1 |
| 2020-10-19 07:20 | 17.6 |
| 2020-10-19 07:30 | 17.9 |
| 2020-10-19 07:40 | 18.7 |
| 2020-10-19 07:50 | 19.4 |
| 2020-10-19 08:00 | 19.4 |
| 2020-10-19 08:10 | 19.9 |
| 2020-10-19 08:20 | 20.4 |
| 2020-10-19 08:30 | 20.4 |
| 2020-10-19 08:40 | 21.1 |
| 2020-10-19 08:50 | 21.1 |
| 2020-10-19 09:00 | 21.4 |
| 2020-10-19 09:10 | 22.8 |
| 2020-10-19 09:20 | 22.9 |
| 2020-10-19 09:30 | 23.6 |
| 2020-10-19 09:40 | 23.1 |
| 2020-10-19 09:50 | 24.3 |
| 2020-10-19 10:00 | 25.1 |
| 2020-10-19 10:10 | 24.8 |



|                  |      |
|------------------|------|
| 2020-10-19 10:20 | 25.4 |
| 2020-10-19 10:30 | 25.9 |
| 2020-10-19 10:40 | 26.1 |
| 2020-10-19 10:50 | 27.1 |
| 2020-10-19 11:00 | 28.1 |
| 2020-10-19 11:10 | 28.3 |
| 2020-10-19 11:20 | 28.8 |
| 2020-10-19 11:30 | 29.4 |
| 2020-10-19 11:40 | 29.3 |
| 2020-10-19 11:50 | 29.9 |
| 2020-10-19 12:00 | 29.6 |
| 2020-10-19 12:10 | 30.2 |
| 2020-10-19 12:20 | 30.1 |
| 2020-10-19 12:30 | 30.7 |
| 2020-10-19 12:40 | 30.1 |
| 2020-10-19 12:50 | 30.2 |
| 2020-10-19 13:00 | 31.6 |
| 2020-10-19 13:10 | 32.1 |
| 2020-10-19 13:20 | 31.1 |
| 2020-10-19 13:30 | 32.6 |
| 2020-10-19 13:40 | 33.7 |
| 2020-10-19 13:50 | 33.8 |
| 2020-10-19 14:00 | 33.3 |
| 2020-10-19 14:10 | 33.9 |
| 2020-10-19 14:20 | 33.9 |
| 2020-10-19 14:30 | 33.7 |
| 2020-10-19 14:40 | 33.6 |
| 2020-10-19 14:50 | 34.8 |
| 2020-10-19 15:00 | 34.1 |
| 2020-10-19 15:10 | 33.7 |
| 2020-10-19 15:20 | 34.1 |
| 2020-10-19 15:30 | 34.3 |
| 2020-10-19 15:40 | 34.9 |
| 2020-10-19 15:50 | 33.4 |
| 2020-10-19 16:00 | 32.3 |
| 2020-10-19 16:10 | 33.1 |
| 2020-10-19 16:20 | 32.1 |
| 2020-10-19 16:30 | 32.7 |
| 2020-10-19 16:40 | 33.5 |
| 2020-10-19 16:50 | 32.7 |
| 2020-10-19 17:00 | 32.4 |
| 2020-10-19 17:10 | 31.6 |
| 2020-10-19 17:20 | 31.6 |
| 2020-10-19 17:30 | 30.8 |
| 2020-10-19 17:40 | 30.8 |
| 2020-10-19 17:50 | 31.1 |
| 2020-10-19 18:00 | 30.1 |
| 2020-10-19 18:10 | 28.8 |
| 2020-10-19 18:20 | 27.9 |
| 2020-10-19 18:30 | 27.4 |



|                  |      |
|------------------|------|
| 2020-10-19 18:40 | 26.9 |
| 2020-10-19 18:50 | 26.4 |
| 2020-10-19 18:50 | 26.4 |
| 2020-10-19 19:00 | 25.9 |
| 2020-10-19 19:10 | 25.8 |
| 2020-10-19 19:20 | 25.7 |
| 2020-10-19 19:30 | 25.3 |
| 2020-10-19 19:40 | 25.1 |
| 2020-10-19 19:50 | 24.9 |
| 2020-10-19 20:00 | 24.6 |
| 2020-10-19 20:10 | 24.4 |
| 2020-10-19 20:20 | 24.5 |
| 2020-10-19 20:30 | 24.6 |
| 2020-10-19 20:40 | 24.4 |
| 2020-10-19 20:50 | 24.2 |
| 2020-10-19 21:00 | 24   |
| 2020-10-19 21:10 | 23.9 |
| 2020-10-19 21:20 | 24   |
| 2020-10-19 21:30 | 23.8 |
| 2020-10-19 21:40 | 23.6 |
| 2020-10-19 21:50 | 23.3 |
| 2020-10-19 22:00 | 23.2 |
| 2020-10-19 22:10 | 23.2 |
| 2020-10-19 22:20 | 22.8 |
| 2020-10-19 22:30 | 21.9 |
| 2020-10-19 22:40 | 21.3 |
| 2020-10-19 22:50 | 20.8 |
| 2020-10-19 23:00 | 20.6 |
| 2020-10-19 23:10 | 20.4 |
| 2020-10-19 23:20 | 20.3 |
| 2020-10-19 23:30 | 20.1 |
| 2020-10-19 23:40 | 19.7 |
| 2020-10-19 23:50 | 19.3 |
| 2020-10-20 00:00 | 18.8 |
| 2020-10-20 00:10 | 18.3 |
| 2020-10-20 00:20 | 17.8 |
| 2020-10-20 00:30 | 17.7 |
| 2020-10-20 00:40 | 17.7 |
| 2020-10-20 00:50 | 18.4 |
| 2020-10-20 01:00 | 18.8 |
| 2020-10-20 01:10 | 18.8 |
| 2020-10-20 01:20 | 18.6 |
| 2020-10-20 01:30 | 18.6 |
| 2020-10-20 01:40 | 18.5 |
| 2020-10-20 01:50 | 18.6 |
| 2020-10-20 02:00 | 18.6 |
| 2020-10-20 02:10 | 18.6 |
| 2020-10-20 02:20 | 18.7 |
| 2020-10-20 02:30 | 18.6 |
| 2020-10-20 02:40 | 18.4 |



|                  |      |
|------------------|------|
| 2020-10-20 02:50 | 18.4 |
| 2020-10-20 03:00 | 18.3 |
| 2020-10-20 03:10 | 18.1 |
| 2020-10-20 03:20 | 18.1 |
| 2020-10-20 03:30 | 17.9 |
| 2020-10-20 03:40 | 17.9 |
| 2020-10-20 03:50 | 17.8 |
| 2020-10-20 04:00 | 17.8 |
| 2020-10-20 04:10 | 17.8 |
| 2020-10-20 04:20 | 17.8 |
| 2020-10-20 04:30 | 17.8 |
| 2020-10-20 04:40 | 17.8 |
| 2020-10-20 04:50 | 17.6 |
| 2020-10-20 05:00 | 17.5 |
| 2020-10-20 05:10 | 17.4 |
| 2020-10-20 05:20 | 17.3 |
| 2020-10-20 05:30 | 17.3 |
| 2020-10-20 05:40 | 17.3 |
| 2020-10-20 05:50 | 17.3 |
| 2020-10-20 06:00 | 17.3 |
| 2020-10-20 06:10 | 17.3 |
| 2020-10-20 06:20 | 17.4 |
| 2020-10-20 06:30 | 17.6 |
| 2020-10-20 06:40 | 18.1 |
| 2020-10-20 06:50 | 18.8 |
| 2020-10-20 07:00 | 19.4 |
| 2020-10-20 07:10 | 19.8 |
| 2020-10-20 07:20 | 19.9 |
| 2020-10-20 07:30 | 20.3 |
| 2020-10-20 07:40 | 20.9 |
| 2020-10-20 07:50 | 21.5 |
| 2020-10-20 08:00 | 21.9 |
| 2020-10-20 08:10 | 22.9 |
| 2020-10-20 08:20 | 23.8 |
| 2020-10-20 08:30 | 24.1 |
| 2020-10-20 08:40 | 23.3 |
| 2020-10-20 08:50 | 23.3 |
| 2020-10-20 09:00 | 23.8 |
| 2020-10-20 09:10 | 24.9 |
| 2020-10-20 09:20 | 25.8 |
| 2020-10-20 09:30 | 25.6 |
| 2020-10-20 09:40 | 26.1 |
| 2020-10-20 09:50 | 26.1 |
| 2020-10-20 10:00 | 27.1 |
| 2020-10-20 10:10 | 27.6 |
| 2020-10-20 10:20 | 28   |
| 2020-10-20 10:30 | 28.3 |
| 2020-10-20 10:40 | 29.6 |
| 2020-10-20 10:50 | 30.4 |
| 2020-10-20 11:00 | 29.9 |



|                  |      |
|------------------|------|
| 2020-10-20 11:10 | 30.8 |
| 2020-10-20 11:20 | 31.1 |
| 2020-10-20 11:30 | 31.4 |
| 2020-10-20 11:40 | 31.8 |
| 2020-10-20 11:50 | 32.3 |
| 2020-10-20 12:00 | 33.1 |
| 2020-10-20 12:10 | 32.7 |
| 2020-10-20 12:20 | 32.4 |
| 2020-10-20 12:30 | 32.9 |
| 2020-10-20 12:40 | 32.2 |
| 2020-10-20 12:50 | 31.7 |
| 2020-10-20 13:00 | 30.7 |
| 2020-10-20 13:10 | 29.8 |
| 2020-10-20 13:20 | 30.6 |
| 2020-10-20 13:30 | 29.8 |
| 2020-10-20 13:40 | 28.9 |
| 2020-10-20 13:50 | 29.3 |
| 2020-10-20 14:00 | 30.9 |
| 2020-10-20 14:10 | 32.4 |
| 2020-10-20 14:20 | 32.4 |
| 2020-10-20 14:30 | 31.8 |
| 2020-10-20 14:40 | 34.2 |
| 2020-10-20 14:50 | 31.3 |
| 2020-10-20 15:00 | 32.8 |
| 2020-10-20 15:10 | 33.4 |
| 2020-10-20 15:20 | 32.4 |
| 2020-10-20 15:30 | 32.8 |
| 2020-10-20 15:40 | 30.9 |
| 2020-10-20 15:50 | 31.6 |
| 2020-10-20 16:00 | 30.3 |
| 2020-10-20 16:10 | 28.5 |
| 2020-10-20 16:20 | 28.6 |
| 2020-10-20 16:30 | 28.8 |
| 2020-10-20 16:40 | 28.5 |
| 2020-10-20 16:50 | 28.8 |
| 2020-10-20 17:00 | 28.9 |
| 2020-10-20 17:10 | 27.6 |
| 2020-10-20 17:20 | 27.8 |
| 2020-10-20 17:30 | 27.3 |
| 2020-10-20 17:40 | 27.1 |
| 2020-10-20 17:50 | 27.1 |
| 2020-10-20 18:00 | 27.5 |
| 2020-10-20 18:10 | 27.3 |
| 2020-10-20 18:20 | 27.3 |
| 2020-10-20 18:30 | 27.2 |
| 2020-10-20 18:40 | 26.7 |
| 2020-10-20 18:50 | 26.4 |
| 2020-10-20 19:00 | 26.2 |
| 2020-10-20 19:10 | 25.9 |
| 2020-10-20 19:20 | 25.9 |



|                  |      |
|------------------|------|
| 2020-10-20 19:30 | 25.7 |
| 2020-10-20 19:40 | 25.7 |
| 2020-10-20 19:50 | 25.7 |
| 2020-10-20 20:00 | 25.5 |
| 2020-10-20 20:10 | 25.3 |
| 2020-10-20 20:20 | 25.2 |
| 2020-10-20 20:30 | 25   |
| 2020-10-20 20:40 | 24.7 |
| 2020-10-20 20:50 | 24.4 |
| 2020-10-20 21:00 | 24.3 |
| 2020-10-20 21:10 | 24.1 |
| 2020-10-20 21:20 | 23.9 |
| 2020-10-20 21:30 | 23.8 |
| 2020-10-20 21:40 | 23.6 |
| 2020-10-20 21:50 | 23.6 |
| 2020-10-20 22:00 | 23.4 |
| 2020-10-20 22:10 | 23.1 |
| 2020-10-20 22:20 | 22.9 |
| 2020-10-20 22:30 | 22.7 |
| 2020-10-20 22:40 | 22.6 |
| 2020-10-20 22:50 | 22.5 |
| 2020-10-20 23:00 | 22.4 |
| 2020-10-20 23:10 | 22.3 |
| 2020-10-20 23:20 | 22.1 |
| 2020-10-20 23:30 | 22   |
| 2020-10-20 23:40 | 21.9 |
| 2020-10-20 23:50 | 21.8 |
| 2020-10-21 00:00 | 21.6 |
| 2020-10-21 00:10 | 21.5 |
| 2020-10-21 00:20 | 21.5 |
| 2020-10-21 00:30 | 21.4 |
| 2020-10-21 00:40 | 21.1 |
| 2020-10-21 00:50 | 21   |
| 2020-10-21 01:00 | 20.9 |
| 2020-10-21 01:10 | 20.8 |
| 2020-10-21 01:20 | 20.6 |
| 2020-10-21 01:30 | 20.4 |
| 2020-10-21 01:40 | 20.3 |
| 2020-10-21 01:50 | 20.1 |
| 2020-10-21 02:00 | 19.7 |
| 2020-10-21 02:10 | 19.5 |
| 2020-10-21 02:20 | 19.3 |
| 2020-10-21 02:30 | 19.1 |
| 2020-10-21 02:40 | 18.9 |
| 2020-10-21 02:50 | 18.8 |
| 2020-10-21 03:00 | 18.4 |
| 2020-10-21 03:10 | 18.3 |
| 2020-10-21 03:20 | 18   |
| 2020-10-21 03:30 | 17.8 |
| 2020-10-21 03:40 | 17.6 |



|                  |      |
|------------------|------|
| 2020-10-21 03:50 | 17.3 |
| 2020-10-21 04:00 | 17.1 |
| 2020-10-21 04:10 | 16.9 |
| 2020-10-21 04:20 | 16.8 |
| 2020-10-21 04:30 | 16.8 |
| 2020-10-21 04:40 | 16.8 |
| 2020-10-21 04:50 | 16.9 |
| 2020-10-21 05:00 | 16.8 |
| 2020-10-21 05:10 | 16.8 |
| 2020-10-21 05:20 | 16.7 |
| 2020-10-21 05:30 | 16.5 |
| 2020-10-21 05:40 | 16.4 |
| 2020-10-21 05:50 | 16.4 |
| 2020-10-21 06:00 | 16.4 |
| 2020-10-21 06:10 | 16.5 |
| 2020-10-21 06:20 | 16.6 |
| 2020-10-21 06:30 | 16.7 |
| 2020-10-21 06:40 | 16.9 |
| 2020-10-21 06:50 | 16.9 |
| 2020-10-21 07:00 | 16.8 |
| 2020-10-21 07:10 | 17.1 |
| 2020-10-21 07:20 | 17.4 |
| 2020-10-21 07:30 | 18   |
| 2020-10-21 07:40 | 18.1 |
| 2020-10-21 07:50 | 19.1 |
| 2020-10-21 08:00 | 19.1 |
| 2020-10-21 08:10 | 19.8 |
| 2020-10-21 08:20 | 20.6 |
| 2020-10-21 08:30 | 21.6 |
| 2020-10-21 08:40 | 22.6 |
| 2020-10-21 08:50 | 22.9 |
| 2020-10-21 09:00 | 23.2 |
| 2020-10-21 09:10 | 23.6 |
| 2020-10-21 09:20 | 23.8 |
| 2020-10-21 09:30 | 24.5 |
| 2020-10-21 09:40 | 25.4 |
| 2020-10-21 09:50 | 26.1 |
| 2020-10-21 10:00 | 26.6 |
| 2020-10-21 10:10 | 26.4 |
| 2020-10-21 10:20 | 28   |
| 2020-10-21 10:30 | 28.2 |
| 2020-10-21 10:40 | 28.5 |
| 2020-10-21 10:50 | 28.3 |
| 2020-10-21 11:00 | 29.1 |
| 2020-10-21 11:10 | 29.4 |
| 2020-10-21 11:20 | 30   |
| 2020-10-21 11:30 | 30.6 |
| 2020-10-21 11:40 | 31.7 |
| 2020-10-21 11:50 | 32.2 |
| 2020-10-21 12:00 | 32.8 |



|                  |      |
|------------------|------|
| 2020-10-21 12:10 | 32.9 |
| 2020-10-21 12:20 | 32.5 |
| 2020-10-21 12:30 | 32.4 |
| 2020-10-21 12:40 | 34.1 |
| 2020-10-21 12:50 | 32.4 |
| 2020-10-21 13:00 | 32.3 |
| 2020-10-21 13:10 | 33.9 |
| 2020-10-21 13:20 | 32.2 |
| 2020-10-21 13:30 | 32.6 |
| 2020-10-21 13:40 | 33.2 |
| 2020-10-21 13:50 | 32.6 |
| 2020-10-21 14:00 | 33.3 |
| 2020-10-21 14:10 | 31.2 |
| 2020-10-21 14:20 | 30.4 |
| 2020-10-21 14:30 | 31   |
| 2020-10-21 14:40 | 34.9 |
| 2020-10-21 14:50 | 33.2 |
| 2020-10-21 15:00 | 34.1 |
| 2020-10-21 15:10 | 33.7 |
| 2020-10-21 15:20 | 34.3 |
| 2020-10-21 15:30 | 33.2 |
| 2020-10-21 15:40 | 33.1 |
| 2020-10-21 15:50 | 33.3 |
| 2020-10-21 16:00 | 32.7 |
| 2020-10-21 16:10 | 32.4 |
| 2020-10-21 16:20 | 33.4 |
| 2020-10-21 16:30 | 32.5 |
| 2020-10-21 16:40 | 31.6 |
| 2020-10-21 16:50 | 31.8 |
| 2020-10-21 17:00 | 31.6 |
| 2020-10-21 17:10 | 31.1 |
| 2020-10-21 17:20 | 30.1 |
| 2020-10-21 17:30 | 30.6 |
| 2020-10-21 17:40 | 30.1 |
| 2020-10-21 17:50 | 29.6 |
| 2020-10-21 18:00 | 28.9 |
| 2020-10-21 18:10 | 28.2 |
| 2020-10-21 18:20 | 27.6 |
| 2020-10-21 18:30 | 27.1 |
| 2020-10-21 18:40 | 26.7 |
| 2020-10-21 18:50 | 26.3 |
| 2020-10-21 19:00 | 25.9 |
| 2020-10-21 19:10 | 25.6 |
| 2020-10-21 19:20 | 25.3 |
| 2020-10-21 19:30 | 25.1 |
| 2020-10-21 19:40 | 24.8 |
| 2020-10-21 19:50 | 24.5 |
| 2020-10-21 20:00 | 24.3 |
| 2020-10-21 20:10 | 24   |
| 2020-10-21 20:20 | 23.8 |



|                  |      |
|------------------|------|
| 2020-10-21 20:30 | 23.5 |
| 2020-10-21 20:40 | 23.3 |
| 2020-10-21 20:50 | 23.1 |
| 2020-10-21 21:00 | 22.9 |
| 2020-10-21 21:10 | 22.7 |
| 2020-10-21 21:20 | 22.4 |
| 2020-10-21 21:30 | 22.2 |
| 2020-10-21 21:40 | 22   |
| 2020-10-21 21:50 | 21.8 |
| 2020-10-21 22:00 | 21.6 |
| 2020-10-21 22:10 | 21.4 |
| 2020-10-21 22:20 | 21.1 |
| 2020-10-21 22:30 | 20.9 |
| 2020-10-21 22:40 | 20.8 |
| 2020-10-21 22:50 | 20.5 |
| 2020-10-21 23:00 | 20.3 |
| 2020-10-21 23:10 | 20.1 |
| 2020-10-21 23:20 | 20.1 |
| 2020-10-21 23:30 | 19.9 |
| 2020-10-21 23:40 | 20   |
| 2020-10-21 23:50 | 20.2 |
| 2020-10-22 00:00 | 20.3 |
| 2020-10-22 00:10 | 20.1 |
| 2020-10-22 00:20 | 19.9 |
| 2020-10-22 00:30 | 19.8 |
| 2020-10-22 00:40 | 19.6 |
| 2020-10-22 00:50 | 19.4 |
| 2020-10-22 01:00 | 19.3 |
| 2020-10-22 01:10 | 19.1 |
| 2020-10-22 01:20 | 19   |
| 2020-10-22 01:30 | 18.8 |
| 2020-10-22 01:40 | 18.8 |
| 2020-10-22 01:50 | 18.6 |
| 2020-10-22 02:00 | 18.5 |
| 2020-10-22 02:10 | 18.4 |
| 2020-10-22 02:20 | 18.3 |
| 2020-10-22 02:30 | 18.3 |
| 2020-10-22 02:40 | 18.1 |
| 2020-10-22 02:50 | 18.1 |
| 2020-10-22 03:00 | 18.2 |
| 2020-10-22 03:10 | 18   |
| 2020-10-22 03:20 | 17.9 |
| 2020-10-22 03:30 | 17.9 |
| 2020-10-22 03:40 | 17.8 |
| 2020-10-22 03:50 | 17.6 |
| 2020-10-22 04:00 | 17.4 |
| 2020-10-22 04:10 | 17.4 |
| 2020-10-22 04:20 | 17.3 |
| 2020-10-22 04:30 | 17.1 |
| 2020-10-22 04:40 | 17   |



|                  |      |
|------------------|------|
| 2020-10-22 04:50 | 16.9 |
| 2020-10-22 05:00 | 16.8 |
| 2020-10-22 05:10 | 16.6 |
| 2020-10-22 05:20 | 16.4 |
| 2020-10-22 05:30 | 16.3 |
| 2020-10-22 05:40 | 16.3 |
| 2020-10-22 05:50 | 16.3 |
| 2020-10-22 06:00 | 16.3 |
| 2020-10-22 06:10 | 16.3 |
| 2020-10-22 06:20 | 16.4 |
| 2020-10-22 06:30 | 16.7 |
| 2020-10-22 06:40 | 17.6 |
| 2020-10-22 06:50 | 18.1 |
| 2020-10-22 07:00 | 18.7 |
| 2020-10-22 07:10 | 19.3 |
| 2020-10-22 07:20 | 19.3 |
| 2020-10-22 07:30 | 19.9 |
| 2020-10-22 07:40 | 20.3 |
| 2020-10-22 07:50 | 20.4 |
| 2020-10-22 08:00 | 20.8 |
| 2020-10-22 08:10 | 21.4 |
| 2020-10-22 08:20 | 21.4 |
| 2020-10-22 08:30 | 21.9 |
| 2020-10-22 08:40 | 22.1 |
| 2020-10-22 08:50 | 22.1 |
| 2020-10-22 09:00 | 22.2 |
| 2020-10-22 09:10 | 22.6 |
| 2020-10-22 09:20 | 22.9 |
| 2020-10-22 09:30 | 23   |
| 2020-10-22 09:40 | 23.5 |
| 2020-10-22 09:50 | 24.2 |
| 2020-10-22 10:00 | 24.1 |
| 2020-10-22 10:10 | 24.7 |
| 2020-10-22 10:20 | 25.4 |
| 2020-10-22 10:30 | 25.4 |
| 2020-10-22 10:40 | 26.2 |
| 2020-10-22 10:50 | 26.4 |
| 2020-10-22 11:00 | 26.4 |
| 2020-10-22 11:10 | 27   |
| 2020-10-22 11:20 | 27.6 |
| 2020-10-22 11:30 | 28.2 |
| 2020-10-22 11:40 | 28.1 |
| 2020-10-22 11:50 | 27.9 |
| 2020-10-22 12:00 | 28.2 |
| 2020-10-22 12:10 | 29.1 |
| 2020-10-22 12:20 | 29.4 |
| 2020-10-22 12:30 | 28.5 |
| 2020-10-22 12:40 | 29.6 |
| 2020-10-22 12:50 | 30.9 |
| 2020-10-22 13:00 | 30.6 |



|                  |      |
|------------------|------|
| 2020-10-22 13:10 | 30.1 |
| 2020-10-22 13:20 | 30.8 |
| 2020-10-22 13:30 | 30   |
| 2020-10-22 13:40 | 31.4 |
| 2020-10-22 13:50 | 31.8 |
| 2020-10-22 14:00 | 30.9 |
| 2020-10-22 14:10 | 31.3 |
| 2020-10-22 14:20 | 31.4 |
| 2020-10-22 14:30 | 31.3 |
| 2020-10-22 14:40 | 32.4 |
| 2020-10-22 14:50 | 31.9 |
| 2020-10-22 15:00 | 31.3 |
| 2020-10-22 15:10 | 30.3 |
| 2020-10-22 15:20 | 31.2 |
| 2020-10-22 15:30 | 32.4 |
| 2020-10-22 15:40 | 31.3 |
| 2020-10-22 15:50 | 28.9 |
| 2020-10-22 16:00 | 30.4 |
| 2020-10-22 16:10 | 31.6 |
| 2020-10-22 16:20 | 30.7 |
| 2020-10-22 16:30 | 31.9 |
| 2020-10-22 16:40 | 31.1 |
| 2020-10-22 16:50 | 30.9 |
| 2020-10-22 17:00 | 30.7 |
| 2020-10-22 17:10 | 30.8 |
| 2020-10-22 17:20 | 29.8 |
| 2020-10-22 17:30 | 28.7 |
| 2020-10-22 17:40 | 27.9 |
| 2020-10-22 17:50 | 27.6 |
| 2020-10-22 18:00 | 27.5 |
| 2020-10-22 18:10 | 27   |
| 2020-10-22 18:20 | 26.6 |
| 2020-10-22 18:30 | 26.3 |
| 2020-10-22 18:40 | 26   |
| 2020-10-22 18:50 | 25.6 |
| 2020-10-22 19:00 | 25.3 |
| 2020-10-22 19:10 | 25.2 |
| 2020-10-22 19:20 | 24.9 |
| 2020-10-22 19:30 | 24.6 |
| 2020-10-22 19:40 | 24.4 |
| 2020-10-22 19:50 | 24.3 |
| 2020-10-22 20:00 | 23.9 |
| 2020-10-22 20:10 | 23.8 |
| 2020-10-22 20:20 | 23.6 |
| 2020-10-22 20:30 | 23.4 |
| 2020-10-22 20:40 | 23.1 |
| 2020-10-22 20:50 | 22.9 |
| 2020-10-22 21:00 | 22.8 |
| 2020-10-22 21:10 | 22.8 |
| 2020-10-22 21:20 | 22.6 |



|                  |      |
|------------------|------|
| 2020-10-22 21:30 | 22.6 |
| 2020-10-22 21:40 | 22.4 |
| 2020-10-22 21:50 | 22.3 |
| 2020-10-22 22:00 | 22.1 |
| 2020-10-22 22:10 | 21.8 |
| 2020-10-22 22:20 | 21.6 |
| 2020-10-22 22:30 | 21.4 |
| 2020-10-22 22:40 | 21.2 |
| 2020-10-22 22:50 | 21.1 |
| 2020-10-22 23:00 | 20.8 |
| 2020-10-22 23:10 | 20.7 |
| 2020-10-22 23:20 | 20.4 |
| 2020-10-22 23:30 | 20.3 |
| 2020-10-22 23:40 | 20.1 |
| 2020-10-22 23:50 | 19.9 |
| 2020-10-23 00:00 | 19.8 |
| 2020-10-23 00:10 | 19.6 |
| 2020-10-23 00:20 | 19.6 |
| 2020-10-23 00:30 | 19.4 |
| 2020-10-23 00:40 | 19.3 |
| 2020-10-23 00:50 | 19.3 |
| 2020-10-23 01:00 | 19.2 |
| 2020-10-23 01:10 | 19.1 |
| 2020-10-23 01:20 | 18.9 |
| 2020-10-23 01:30 | 18.8 |
| 2020-10-23 01:40 | 18.6 |
| 2020-10-23 01:50 | 18.6 |
| 2020-10-23 02:00 | 18.5 |
| 2020-10-23 02:10 | 18.4 |
| 2020-10-23 02:20 | 18.3 |
| 2020-10-23 02:20 | 18.3 |
| 2020-10-23 02:30 | 18.3 |
| 2020-10-23 02:40 | 18.3 |
| 2020-10-23 02:50 | 18.2 |
| 2020-10-23 03:00 | 18.1 |
| 2020-10-23 03:10 | 18.1 |
| 2020-10-23 03:20 | 17.9 |
| 2020-10-23 03:30 | 17.9 |
| 2020-10-23 03:40 | 17.8 |
| 2020-10-23 03:50 | 17.6 |
| 2020-10-23 04:00 | 17.5 |
| 2020-10-23 04:10 | 17.4 |
| 2020-10-23 04:20 | 17.3 |
| 2020-10-23 04:30 | 17.2 |
| 2020-10-23 04:40 | 17.2 |
| 2020-10-23 04:50 | 17.1 |
| 2020-10-23 05:00 | 17.1 |
| 2020-10-23 05:10 | 17.2 |
| 2020-10-23 05:20 | 17.2 |
| 2020-10-23 05:30 | 17.3 |



|                  |      |
|------------------|------|
| 2020-10-23 05:40 | 17.3 |
| 2020-10-23 05:50 | 17.4 |
| 2020-10-23 06:00 | 17.3 |
| 2020-10-23 06:10 | 17.4 |
| 2020-10-23 06:20 | 17.4 |
| 2020-10-23 06:30 | 17.8 |
| 2020-10-23 06:40 | 18.8 |
| 2020-10-23 06:50 | 19.1 |
| 2020-10-23 07:00 | 18.8 |
| 2020-10-23 07:10 | 18.6 |
| 2020-10-23 07:20 | 19.1 |
| 2020-10-23 07:30 | 19.4 |
| 2020-10-23 07:40 | 20.1 |
| 2020-10-23 07:50 | 20.2 |
| 2020-10-23 08:00 | 20.4 |
| 2020-10-23 08:10 | 20.8 |
| 2020-10-23 08:20 | 21.6 |
| 2020-10-23 08:30 | 21.9 |
| 2020-10-23 08:40 | 21.7 |
| 2020-10-23 08:50 | 21.7 |
| 2020-10-23 09:00 | 22.1 |
| 2020-10-23 09:10 | 22.8 |
| 2020-10-23 09:20 | 22.8 |
| 2020-10-23 09:30 | 22.9 |
| 2020-10-23 09:40 | 23.6 |
| 2020-10-23 09:50 | 23.9 |
| 2020-10-23 10:00 | 24.4 |
| 2020-10-23 10:10 | 23.9 |
| 2020-10-23 10:20 | 24.9 |
| 2020-10-23 10:30 | 24.8 |
| 2020-10-23 10:40 | 25.7 |
| 2020-10-23 10:50 | 26.8 |
| 2020-10-23 11:00 | 27.2 |
| 2020-10-23 11:10 | 26.9 |
| 2020-10-23 11:20 | 27.6 |
| 2020-10-23 11:30 | 28.3 |
| 2020-10-23 11:40 | 27.9 |
| 2020-10-23 11:50 | 28.3 |
| 2020-10-23 12:00 | 29.1 |
| 2020-10-23 12:10 | 29.4 |
| 2020-10-23 12:20 | 29.4 |
| 2020-10-23 12:30 | 29.5 |
| 2020-10-23 12:40 | 30.1 |
| 2020-10-23 12:50 | 30.5 |
| 2020-10-23 13:00 | 30.3 |
| 2020-10-23 13:10 | 30.3 |
| 2020-10-23 13:20 | 31.4 |
| 2020-10-23 13:30 | 30.6 |
| 2020-10-23 13:40 | 31.4 |
| 2020-10-23 13:50 | 30.2 |



|                  |      |
|------------------|------|
| 2020-10-23 14:00 | 31.1 |
| 2020-10-23 14:10 | 32.3 |
| 2020-10-23 14:20 | 31.8 |
| 2020-10-23 14:30 | 30.9 |
| 2020-10-23 14:40 | 30.2 |
| 2020-10-23 14:50 | 29.6 |
| 2020-10-23 15:00 | 30   |
| 2020-10-23 15:10 | 31   |
| 2020-10-23 15:20 | 31.1 |
| 2020-10-23 15:30 | 30.1 |
| 2020-10-23 15:40 | 30.6 |
| 2020-10-23 15:50 | 30.2 |
| 2020-10-23 16:00 | 30.3 |
| 2020-10-23 16:10 | 30.6 |
| 2020-10-23 16:20 | 30.9 |
| 2020-10-23 16:30 | 29.3 |
| 2020-10-23 16:40 | 29.7 |
| 2020-10-23 16:50 | 29.4 |
| 2020-10-23 17:10 | 29.2 |
| 2020-10-23 17:20 | 27.4 |
| 2020-10-23 17:30 | 27.2 |
| 2020-10-23 17:40 | 27.1 |
| 2020-10-23 17:50 | 26.9 |
| 2020-10-23 18:00 | 26.6 |
| 2020-10-23 18:10 | 26.3 |
| 2020-10-23 18:20 | 25.9 |
| 2020-10-23 18:30 | 25.6 |
| 2020-10-23 18:40 | 25.1 |
| 2020-10-23 18:50 | 24.8 |
| 2020-10-23 19:00 | 24.4 |
| 2020-10-23 19:10 | 24.1 |
| 2020-10-23 19:20 | 23.7 |
| 2020-10-23 19:30 | 23.4 |
| 2020-10-23 19:40 | 23.1 |
| 2020-10-23 19:50 | 22.9 |
| 2020-10-23 20:00 | 22.8 |
| 2020-10-23 20:10 | 22.7 |
| 2020-10-23 20:20 | 22.4 |
| 2020-10-23 20:30 | 22.3 |
| 2020-10-23 20:40 | 22.1 |
| 2020-10-23 20:50 | 22.1 |
| 2020-10-23 21:00 | 21.9 |
| 2020-10-23 21:10 | 21.9 |
| 2020-10-23 21:30 | 21.6 |
| 2020-10-23 21:40 | 21.6 |
| 2020-10-23 21:50 | 21.4 |
| 2020-10-23 22:00 | 21.1 |
| 2020-10-23 22:10 | 21.2 |
| 2020-10-23 22:20 | 21.3 |
| 2020-10-23 22:30 | 21.1 |



|                  |      |
|------------------|------|
| 2020-10-23 22:40 | 20.9 |
| 2020-10-23 22:50 | 20.6 |
| 2020-10-23 23:00 | 20.3 |
| 2020-10-23 23:10 | 20.2 |
| 2020-10-23 23:20 | 20.1 |
| 2020-10-23 23:30 | 20.1 |
| 2020-10-23 23:40 | 20   |
| 2020-10-23 23:50 | 19.9 |
| 2020-10-24 00:00 | 19.9 |
| 2020-10-24 00:10 | 19.9 |
| 2020-10-24 00:20 | 19.3 |
| 2020-10-24 00:30 | 19.2 |
| 2020-10-24 00:40 | 19   |
| 2020-10-24 00:50 | 18.8 |
| 2020-10-24 01:00 | 18.7 |
| 2020-10-24 01:10 | 18.7 |
| 2020-10-24 01:20 | 18.7 |
| 2020-10-24 01:30 | 18.6 |
| 2020-10-24 01:40 | 18.5 |
| 2020-10-24 01:50 | 18.3 |
| 2020-10-24 02:00 | 18.2 |
| 2020-10-24 02:10 | 18.1 |
| 2020-10-24 02:20 | 18.1 |
| 2020-10-24 02:30 | 18.1 |
| 2020-10-24 02:40 | 18   |
| 2020-10-24 02:50 | 17.9 |
| 2020-10-24 03:00 | 17.8 |
| 2020-10-24 03:10 | 17.6 |
| 2020-10-24 03:20 | 17.4 |
| 2020-10-24 03:30 | 17.4 |
| 2020-10-24 03:40 | 17.3 |
| 2020-10-24 03:50 | 17.3 |
| 2020-10-24 04:00 | 17.4 |
| 2020-10-24 04:10 | 17.6 |
| 2020-10-24 04:20 | 17.5 |
| 2020-10-24 04:30 | 17.5 |
| 2020-10-24 04:40 | 17.4 |
| 2020-10-24 04:50 | 17.4 |
| 2020-10-24 05:00 | 17.4 |
| 2020-10-24 05:10 | 17.5 |
| 2020-10-24 05:20 | 17.4 |
| 2020-10-24 05:30 | 17.3 |
| 2020-10-24 05:40 | 17.1 |
| 2020-10-24 05:50 | 17.1 |
| 2020-10-24 06:00 | 17.1 |
| 2020-10-24 06:10 | 17.3 |
| 2020-10-24 06:20 | 17.4 |
| 2020-10-24 06:30 | 17.7 |
| 2020-10-24 06:40 | 18   |
| 2020-10-24 06:50 | 18.1 |



|                  |      |
|------------------|------|
| 2020-10-24 07:00 | 18.3 |
| 2020-10-24 07:10 | 18.5 |
| 2020-10-24 07:20 | 18.8 |
| 2020-10-24 07:30 | 19.3 |
| 2020-10-24 07:40 | 19.8 |
| 2020-10-24 07:50 | 20.3 |
| 2020-10-24 08:00 | 20.6 |
| 2020-10-24 08:10 | 21.3 |
| 2020-10-24 08:20 | 22.1 |
| 2020-10-24 08:30 | 22.5 |
| 2020-10-24 08:40 | 23.6 |
| 2020-10-24 08:50 | 23.7 |
| 2020-10-24 09:00 | 23.8 |
| 2020-10-24 09:10 | 24.4 |
| 2020-10-24 09:20 | 26.1 |
| 2020-10-24 09:30 | 26.7 |
| 2020-10-24 09:40 | 27.4 |
| 2020-10-24 09:50 | 27.4 |
| 2020-10-24 10:00 | 27.9 |
| 2020-10-24 10:10 | 27.3 |
| 2020-10-24 10:20 | 28.3 |
| 2020-10-24 10:30 | 28.8 |
| 2020-10-24 10:40 | 28.9 |
| 2020-10-24 10:50 | 29.8 |
| 2020-10-24 11:00 | 29.9 |
| 2020-10-24 11:10 | 30.3 |
| 2020-10-24 11:20 | 30.9 |
| 2020-10-24 11:30 | 29.1 |
| 2020-10-24 11:40 | 27.3 |
| 2020-10-24 11:50 | 24.8 |
| 2020-10-24 12:00 | 23.4 |
| 2020-10-24 12:10 | 24.4 |
| 2020-10-24 12:20 | 26.4 |
| 2020-10-24 12:30 | 28.9 |
| 2020-10-24 12:40 | 27.3 |
| 2020-10-24 12:50 | 26.6 |
| 2020-10-24 13:00 | 24.1 |
| 2020-10-24 13:10 | 22.3 |
| 2020-10-24 13:20 | 22.4 |
| 2020-10-24 13:30 | 21.4 |
| 2020-10-24 13:40 | 20.3 |
| 2020-10-24 13:50 | 19.8 |
| 2020-10-24 14:00 | 18.3 |
| 2020-10-24 14:10 | 18.5 |
| 2020-10-24 14:20 | 20.7 |
| 2020-10-24 14:30 | 21.8 |
| 2020-10-24 14:40 | 23.4 |
| 2020-10-24 14:50 | 23.7 |
| 2020-10-24 15:00 | 23.3 |
| 2020-10-24 15:10 | 22.6 |



|                  |      |
|------------------|------|
| 2020-10-24 15:20 | 22.3 |
| 2020-10-24 15:30 | 22.5 |
| 2020-10-24 15:40 | 22.7 |
| 2020-10-24 15:50 | 23.6 |
| 2020-10-24 16:00 | 23.9 |
| 2020-10-24 16:10 | 25.1 |
| 2020-10-24 16:20 | 26.7 |
| 2020-10-24 16:30 | 26.8 |
| 2020-10-24 16:40 | 25.9 |
| 2020-10-24 16:50 | 25.4 |
| 2020-10-24 17:00 | 24.7 |
| 2020-10-24 17:10 | 24.5 |
| 2020-10-24 17:20 | 23.9 |
| 2020-10-24 17:30 | 23.5 |
| 2020-10-24 17:40 | 23.1 |
| 2020-10-24 17:50 | 22.9 |
| 2020-10-24 18:00 | 23.1 |
| 2020-10-24 18:10 | 21.3 |
| 2020-10-24 18:20 | 20.7 |
| 2020-10-24 18:30 | 20.3 |
| 2020-10-24 18:40 | 18.8 |
| 2020-10-24 18:50 | 18.2 |
| 2020-10-24 19:00 | 17.9 |
| 2020-10-24 19:10 | 17.6 |
| 2020-10-24 19:20 | 17.4 |
| 2020-10-24 19:30 | 17.6 |
| 2020-10-24 19:40 | 17.8 |
| 2020-10-24 19:50 | 18   |
| 2020-10-24 20:00 | 17.9 |
| 2020-10-24 20:10 | 18.1 |
| 2020-10-24 20:20 | 18   |
| 2020-10-24 20:30 | 17.9 |
| 2020-10-24 20:40 | 17.7 |
| 2020-10-24 20:50 | 17.4 |
| 2020-10-24 21:00 | 17.5 |
| 2020-10-24 21:10 | 17.6 |
| 2020-10-24 21:20 | 16.9 |
| 2020-10-24 21:30 | 16.8 |
| 2020-10-24 21:40 | 16.8 |
| 2020-10-24 21:50 | 16.9 |
| 2020-10-24 22:00 | 16.9 |
| 2020-10-24 22:10 | 16.9 |
| 2020-10-24 22:20 | 16.8 |
| 2020-10-24 22:30 | 16.8 |
| 2020-10-24 22:40 | 16.8 |
| 2020-10-24 22:50 | 16.6 |
| 2020-10-24 23:00 | 16.6 |
| 2020-10-24 23:10 | 16.5 |
| 2020-10-24 23:20 | 16.4 |
| 2020-10-24 23:30 | 16.3 |



|                  |      |
|------------------|------|
| 2020-10-24 23:40 | 16.3 |
| 2020-10-24 23:50 | 16.3 |
| 2020-10-25 00:00 | 16.3 |
| 2020-10-25 00:10 | 16.3 |
| 2020-10-25 00:20 | 16.3 |
| 2020-10-25 00:30 | 16.3 |
| 2020-10-25 00:40 | 16.5 |
| 2020-10-25 00:50 | 17   |
| 2020-10-25 01:00 | 16.9 |
| 2020-10-25 01:10 | 16.7 |
| 2020-10-25 01:20 | 16.5 |
| 2020-10-25 01:30 | 16.3 |
| 2020-10-25 01:40 | 16.2 |
| 2020-10-25 01:50 | 16.2 |
| 2020-10-25 02:00 | 16   |
| 2020-10-25 02:10 | 15.9 |
| 2020-10-25 02:20 | 16.1 |
| 2020-10-25 02:30 | 15.9 |
| 2020-10-25 02:40 | 15.7 |
| 2020-10-25 02:50 | 15.7 |
| 2020-10-25 03:00 | 15.8 |
| 2020-10-25 03:10 | 15.6 |
| 2020-10-25 03:20 | 15.6 |
| 2020-10-25 03:30 | 15.4 |
| 2020-10-25 03:40 | 15.4 |
| 2020-10-25 03:50 | 15.3 |
| 2020-10-25 04:00 | 15.2 |
| 2020-10-25 04:10 | 15.3 |
| 2020-10-25 04:20 | 15.2 |
| 2020-10-25 04:30 | 15.2 |
| 2020-10-25 04:40 | 15.3 |
| 2020-10-25 04:50 | 15.2 |
| 2020-10-25 05:00 | 15.2 |
| 2020-10-25 05:10 | 15.1 |
| 2020-10-25 05:20 | 15.1 |
| 2020-10-25 05:30 | 15.1 |
| 2020-10-25 05:40 | 15   |
| 2020-10-25 05:50 | 15.1 |
| 2020-10-25 06:00 | 15.3 |
| 2020-10-25 06:10 | 15.5 |
| 2020-10-25 06:20 | 15.8 |
| 2020-10-25 06:30 | 16.6 |
| 2020-10-25 06:40 | 17.4 |
| 2020-10-25 06:50 | 18   |
| 2020-10-25 07:00 | 18.4 |
| 2020-10-25 07:10 | 18.8 |
| 2020-10-25 07:20 | 18.9 |
| 2020-10-25 07:30 | 19.8 |
| 2020-10-25 07:40 | 19.6 |
| 2020-10-25 07:50 | 20.8 |



|                  |      |
|------------------|------|
| 2020-10-25 08:00 | 20.4 |
| 2020-10-25 08:10 | 20.9 |
| 2020-10-25 08:20 | 21.8 |
| 2020-10-25 08:30 | 21.8 |
| 2020-10-25 08:40 | 22.8 |
| 2020-10-25 08:50 | 23.3 |
| 2020-10-25 09:00 | 23.7 |
| 2020-10-25 09:10 | 24.5 |
| 2020-10-25 09:20 | 25.6 |
| 2020-10-25 09:30 | 25.4 |
| 2020-10-25 09:40 | 25.7 |
| 2020-10-25 09:50 | 24.9 |
| 2020-10-25 10:00 | 25.1 |
| 2020-10-25 10:10 | 26.1 |
| 2020-10-25 10:20 | 26.9 |
| 2020-10-25 10:30 | 27.4 |
| 2020-10-25 10:40 | 28.8 |
| 2020-10-25 10:50 | 28.4 |
| 2020-10-25 11:00 | 28.3 |
| 2020-10-25 11:10 | 29.3 |
| 2020-10-25 11:20 | 28.8 |
| 2020-10-25 11:30 | 30.5 |
| 2020-10-25 11:40 | 30.2 |
| 2020-10-25 11:50 | 30.8 |
| 2020-10-25 12:00 | 31.1 |
| 2020-10-25 12:10 | 31.1 |
| 2020-10-25 12:20 | 30.4 |
| 2020-10-25 12:30 | 31   |
| 2020-10-25 12:40 | 31.3 |
| 2020-10-25 12:50 | 31.6 |
| 2020-10-25 13:00 | 33.1 |
| 2020-10-25 13:10 | 32.3 |
| 2020-10-25 13:20 | 32.3 |
| 2020-10-25 13:30 | 32.9 |
| 2020-10-25 13:40 | 33.9 |
| 2020-10-25 13:50 | 33.1 |
| 2020-10-25 14:00 | 32.8 |
| 2020-10-25 14:10 | 32.9 |
| 2020-10-25 14:20 | 33.3 |
| 2020-10-25 14:30 | 31   |
| 2020-10-25 14:40 | 32.3 |
| 2020-10-25 14:50 | 33.4 |
| 2020-10-25 15:00 | 33.4 |
| 2020-10-25 15:10 | 33.4 |
| 2020-10-25 15:20 | 31.7 |
| 2020-10-25 15:30 | 31.9 |
| 2020-10-25 15:40 | 34.6 |
| 2020-10-25 15:50 | 33.4 |
| 2020-10-25 16:00 | 31.3 |
| 2020-10-25 16:10 | 33.4 |



|                  |      |
|------------------|------|
| 2020-10-25 16:20 | 31.6 |
| 2020-10-25 16:30 | 30.8 |
| 2020-10-25 16:40 | 29.6 |
| 2020-10-25 16:50 | 29.7 |
| 2020-10-25 17:00 | 29.4 |
| 2020-10-25 17:10 | 29.2 |
| 2020-10-25 17:20 | 29.2 |
| 2020-10-25 17:30 | 29.4 |
| 2020-10-25 17:40 | 29.1 |
| 2020-10-25 17:50 | 29.1 |
| 2020-10-25 18:00 | 29.2 |
| 2020-10-25 18:10 | 29.3 |
| 2020-10-25 18:20 | 28.8 |
| 2020-10-25 18:30 | 28.2 |
| 2020-10-25 18:40 | 27.8 |
| 2020-10-25 18:50 | 27.3 |
| 2020-10-25 19:00 | 26.9 |
| 2020-10-25 19:10 | 26.6 |
| 2020-10-25 19:20 | 26.3 |
| 2020-10-25 19:30 | 26.1 |
| 2020-10-25 19:40 | 25.8 |
| 2020-10-25 19:50 | 25.7 |
| 2020-10-25 20:00 | 25.6 |
| 2020-10-25 20:10 | 25.3 |
| 2020-10-25 20:20 | 24.9 |
| 2020-10-25 20:30 | 24.8 |
| 2020-10-25 20:40 | 24.2 |
| 2020-10-25 20:50 | 24.4 |
| 2020-10-25 21:00 | 24.8 |
| 2020-10-25 21:10 | 24.4 |
| 2020-10-25 21:20 | 24   |
| 2020-10-25 21:30 | 23.6 |
| 2020-10-25 21:40 | 23.4 |
| 2020-10-25 21:50 | 23.3 |
| 2020-10-25 22:00 | 23.1 |
| 2020-10-25 22:10 | 22.9 |
| 2020-10-25 22:20 | 22.8 |
| 2020-10-25 22:30 | 22.7 |
| 2020-10-25 22:40 | 22.6 |
| 2020-10-25 22:50 | 22.4 |
| 2020-10-25 23:00 | 22.4 |
| 2020-10-25 23:10 | 22.3 |
| 2020-10-25 23:20 | 21.4 |
| 2020-10-25 23:30 | 21.4 |
| 2020-10-25 23:40 | 21.3 |
| 2020-10-25 23:50 | 21.2 |
| 2020-10-26 00:00 | 21.3 |
| 2020-10-26 00:10 | 21.4 |
| 2020-10-26 00:20 | 21.2 |
| 2020-10-26 00:30 | 21.4 |



|                  |      |
|------------------|------|
| 2020-10-26 00:40 | 21.3 |
| 2020-10-26 00:50 | 21.2 |
| 2020-10-26 01:00 | 21.1 |
| 2020-10-26 01:10 | 21.1 |
| 2020-10-26 01:20 | 20.9 |
| 2020-10-26 01:30 | 20.7 |
| 2020-10-26 01:40 | 20.6 |
| 2020-10-26 01:50 | 20.4 |
| 2020-10-26 02:00 | 20.4 |
| 2020-10-26 02:10 | 20.1 |
| 2020-10-26 02:20 | 19.9 |
| 2020-10-26 02:30 | 19.8 |
| 2020-10-26 02:40 | 19.6 |
| 2020-10-26 02:50 | 19.5 |
| 2020-10-26 03:00 | 19.4 |
| 2020-10-26 03:10 | 19.6 |
| 2020-10-26 03:20 | 19.7 |
| 2020-10-26 03:30 | 19.7 |
| 2020-10-26 03:40 | 19.6 |
| 2020-10-26 03:50 | 19.6 |
| 2020-10-26 04:00 | 19.4 |
| 2020-10-26 04:10 | 19.3 |
| 2020-10-26 04:20 | 19.3 |
| 2020-10-26 04:30 | 19.2 |
| 2020-10-26 04:40 | 19.1 |
| 2020-10-26 04:50 | 19.1 |
| 2020-10-26 05:00 | 19   |
| 2020-10-26 05:10 | 18.9 |
| 2020-10-26 05:20 | 18.9 |
| 2020-10-26 05:30 | 18.8 |
| 2020-10-26 05:40 | 18.8 |
| 2020-10-26 05:50 | 18.7 |
| 2020-10-26 06:00 | 18.7 |
| 2020-10-26 06:10 | 18.8 |
| 2020-10-26 06:20 | 18.8 |
| 2020-10-26 06:30 | 18.8 |
| 2020-10-26 06:40 | 18.9 |
| 2020-10-26 06:50 | 19   |
| 2020-10-26 07:00 | 19.1 |
| 2020-10-26 07:10 | 19.4 |
| 2020-10-26 07:20 | 19.6 |
| 2020-10-26 07:30 | 19.9 |
| 2020-10-26 07:40 | 20   |
| 2020-10-26 07:50 | 20.4 |
| 2020-10-26 08:00 | 20.8 |
| 2020-10-26 08:10 | 20.7 |
| 2020-10-26 08:20 | 20.9 |
| 2020-10-26 08:30 | 21.6 |
| 2020-10-26 08:40 | 22.3 |
| 2020-10-26 08:50 | 22.4 |



|                  |      |
|------------------|------|
| 2020-10-26 09:00 | 23.6 |
| 2020-10-26 09:10 | 24   |
| 2020-10-26 09:20 | 22.1 |
| 2020-10-26 09:30 | 21.4 |
| 2020-10-26 09:40 | 22.1 |
| 2020-10-26 09:50 | 22.1 |
| 2020-10-26 10:00 | 22.5 |
| 2020-10-26 10:10 | 22.4 |
| 2020-10-26 10:20 | 21.9 |
| 2020-10-26 10:30 | 21.8 |
| 2020-10-26 10:40 | 22   |
| 2020-10-26 10:50 | 21.3 |
| 2020-10-26 11:00 | 20.4 |
| 2020-10-26 11:10 | 19.4 |
| 2020-10-26 11:20 | 19.1 |
| 2020-10-26 11:30 | 19.3 |
| 2020-10-26 11:40 | 19.3 |
| 2020-10-26 11:50 | 19.1 |
| 2020-10-26 12:00 | 19.1 |
| 2020-10-26 12:10 | 19.2 |
| 2020-10-26 12:20 | 18.8 |
| 2020-10-26 12:30 | 19.1 |
| 2020-10-26 12:40 | 19.4 |
| 2020-10-26 12:50 | 19.9 |
| 2020-10-26 13:00 | 20.2 |
| 2020-10-26 13:10 | 21.7 |
| 2020-10-26 13:20 | 21.1 |
| 2020-10-26 13:30 | 21   |
| 2020-10-26 13:40 | 20.8 |
| 2020-10-26 13:50 | 21.1 |
| 2020-10-26 14:00 | 21.3 |
| 2020-10-26 14:10 | 21.8 |
| 2020-10-26 14:20 | 22.6 |
| 2020-10-26 14:30 | 22.8 |
| 2020-10-26 14:40 | 24.1 |
| 2020-10-26 14:50 | 24.3 |
| 2020-10-26 15:00 | 22.7 |
| 2020-10-26 15:10 | 22.6 |
| 2020-10-26 15:20 | 23   |
| 2020-10-26 15:30 | 23.1 |
| 2020-10-26 15:40 | 23.4 |
| 2020-10-26 15:50 | 23.1 |
| 2020-10-26 16:00 | 24.3 |
| 2020-10-26 16:10 | 24.6 |
| 2020-10-26 16:20 | 23.9 |
| 2020-10-26 16:30 | 25   |
| 2020-10-26 16:40 | 25.3 |
| 2020-10-26 16:50 | 24.8 |
| 2020-10-26 17:00 | 24.7 |
| 2020-10-26 17:10 | 23.3 |



|                  |      |
|------------------|------|
| 2020-10-26 17:20 | 22.8 |
| 2020-10-26 17:30 | 22.6 |
| 2020-10-26 17:40 | 22.9 |
| 2020-10-26 17:50 | 22.8 |
| 2020-10-26 18:00 | 22.6 |
| 2020-10-26 18:10 | 22.3 |
| 2020-10-26 18:20 | 21.9 |
| 2020-10-26 18:30 | 21.8 |
| 2020-10-26 18:40 | 21.7 |
| 2020-10-26 18:50 | 21.6 |
| 2020-10-26 19:00 | 21.5 |
| 2020-10-26 19:10 | 19.3 |
| 2020-10-26 19:20 | 17.9 |
| 2020-10-26 19:30 | 17.3 |
| 2020-10-26 19:40 | 16.9 |
| 2020-10-26 19:50 | 16.8 |
| 2020-10-26 20:00 | 16.6 |
| 2020-10-26 20:10 | 16.6 |
| 2020-10-26 20:20 | 16.6 |
| 2020-10-26 20:30 | 16.3 |
| 2020-10-26 20:40 | 16.1 |
| 2020-10-26 20:50 | 16.1 |
| 2020-10-26 21:00 | 15.8 |
| 2020-10-26 21:10 | 15.9 |
| 2020-10-26 21:20 | 15.9 |
| 2020-10-26 21:30 | 15.9 |
| 2020-10-26 21:40 | 15.9 |
| 2020-10-26 21:50 | 15.8 |
| 2020-10-26 22:00 | 15.9 |
| 2020-10-26 22:10 | 15.8 |
| 2020-10-26 22:20 | 15.6 |
| 2020-10-26 22:30 | 15.6 |
| 2020-10-26 22:40 | 15.6 |
| 2020-10-26 22:50 | 15.6 |
| 2020-10-26 23:00 | 15.6 |
| 2020-10-26 23:10 | 15.6 |
| 2020-10-26 23:20 | 15.4 |
| 2020-10-26 23:30 | 15.4 |
| 2020-10-26 23:40 | 15.4 |
| 2020-10-26 23:50 | 15.5 |
| 2020-10-27 00:00 | 15.6 |
| 2020-10-27 00:10 | 15.5 |
| 2020-10-27 00:20 | 15.5 |
| 2020-10-27 00:30 | 15.5 |
| 2020-10-27 00:40 | 15.4 |
| 2020-10-27 00:50 | 15.4 |
| 2020-10-27 01:00 | 15.5 |
| 2020-10-27 01:10 | 15.4 |
| 2020-10-27 01:20 | 15.4 |
| 2020-10-27 01:30 | 15.3 |



|                  |      |
|------------------|------|
| 2020-10-27 01:40 | 15.3 |
| 2020-10-27 01:50 | 15.3 |
| 2020-10-27 02:00 | 15.3 |
| 2020-10-27 02:10 | 15.1 |
| 2020-10-27 02:20 | 14.9 |
| 2020-10-27 02:30 | 14.9 |
| 2020-10-27 02:40 | 14.6 |
| 2020-10-27 02:50 | 14.6 |
| 2020-10-27 03:00 | 14.6 |
| 2020-10-27 03:10 | 14.6 |
| 2020-10-27 03:20 | 14.4 |
| 2020-10-27 03:30 | 14.1 |
| 2020-10-27 03:40 | 14.1 |
| 2020-10-27 03:50 | 13.9 |
| 2020-10-27 04:00 | 13.9 |
| 2020-10-27 04:10 | 13.9 |
| 2020-10-27 04:20 | 13.9 |
| 2020-10-27 04:30 | 13.9 |
| 2020-10-27 04:40 | 13.9 |
| 2020-10-27 04:50 | 13.8 |
| 2020-10-27 05:00 | 13.6 |
| 2020-10-27 05:10 | 13.4 |
| 2020-10-27 05:20 | 13.3 |
| 2020-10-27 05:30 | 13.4 |
| 2020-10-27 05:40 | 13.6 |
| 2020-10-27 05:50 | 13.6 |
| 2020-10-27 06:00 | 13.6 |
| 2020-10-27 06:10 | 13.6 |
| 2020-10-27 06:20 | 13.6 |
| 2020-10-27 06:30 | 14   |
| 2020-10-27 06:40 | 14.1 |
| 2020-10-27 06:50 | 14.1 |
| 2020-10-27 07:00 | 14.3 |
| 2020-10-27 07:10 | 14.3 |
| 2020-10-27 07:20 | 14.3 |
| 2020-10-27 07:30 | 14.2 |
| 2020-10-27 07:40 | 14.2 |
| 2020-10-27 07:50 | 14.3 |
| 2020-10-27 08:00 | 14.4 |
| 2020-10-27 08:10 | 14.9 |
| 2020-10-27 08:20 | 14.8 |
| 2020-10-27 08:30 | 15.1 |
| 2020-10-27 08:40 | 15.4 |
| 2020-10-27 08:50 | 15.3 |
| 2020-10-27 09:00 | 15.8 |
| 2020-10-27 09:10 | 15.3 |
| 2020-10-27 09:20 | 15.6 |
| 2020-10-27 09:30 | 15.4 |
| 2020-10-27 09:40 | 17.5 |
| 2020-10-27 09:50 | 17   |



|                  |      |
|------------------|------|
| 2020-10-27 10:00 | 16.9 |
| 2020-10-27 10:10 | 17.1 |
| 2020-10-27 10:20 | 17.6 |
| 2020-10-27 10:30 | 17.8 |
| 2020-10-27 10:40 | 18.1 |
| 2020-10-27 10:50 | 17.3 |
| 2020-10-27 11:00 | 18.4 |
| 2020-10-27 11:10 | 18.1 |
| 2020-10-27 11:20 | 18.9 |
| 2020-10-27 11:30 | 19.1 |
| 2020-10-27 11:40 | 20.1 |
| 2020-10-27 11:50 | 20   |
| 2020-10-27 12:00 | 20.9 |
| 2020-10-27 12:10 | 20   |
| 2020-10-27 12:20 | 19.8 |
| 2020-10-27 12:30 | 19.9 |
| 2020-10-27 12:40 | 20.8 |
| 2020-10-27 12:50 | 20.8 |
| 2020-10-27 13:00 | 21.4 |
| 2020-10-27 13:10 | 22.1 |
| 2020-10-27 13:20 | 22.4 |
| 2020-10-27 13:30 | 22.3 |
| 2020-10-27 13:40 | 22.8 |
| 2020-10-27 13:50 | 23.2 |
| 2020-10-27 14:00 | 22.1 |
| 2020-10-27 14:10 | 23.2 |
| 2020-10-27 14:20 | 23.3 |
| 2020-10-27 14:30 | 21.9 |
| 2020-10-27 14:40 | 24.2 |
| 2020-10-27 14:50 | 23.8 |
| 2020-10-27 15:00 | 24.2 |
| 2020-10-27 15:10 | 23.9 |
| 2020-10-27 15:20 | 25.6 |
| 2020-10-27 15:30 | 24.4 |
| 2020-10-27 15:40 | 23.4 |
| 2020-10-27 15:50 | 23.3 |
| 2020-10-27 16:00 | 22.9 |
| 2020-10-27 16:10 | 23.8 |
| 2020-10-27 16:20 | 23.7 |
| 2020-10-27 16:30 | 22.3 |
| 2020-10-27 16:40 | 23.6 |
| 2020-10-27 16:50 | 24.3 |
| 2020-10-27 17:00 | 23.4 |
| 2020-10-27 17:10 | 24.2 |
| 2020-10-27 17:20 | 23.1 |
| 2020-10-27 17:30 | 23.3 |
| 2020-10-27 17:40 | 22.9 |
| 2020-10-27 17:50 | 22.6 |
| 2020-10-27 18:00 | 22.1 |
| 2020-10-27 18:10 | 21.3 |



|                  |      |
|------------------|------|
| 2020-10-27 18:20 | 20.6 |
| 2020-10-27 18:30 | 20.3 |
| 2020-10-27 18:40 | 19.9 |
| 2020-10-27 18:50 | 19.6 |
| 2020-10-27 19:00 | 19.4 |
| 2020-10-27 19:20 | 19.1 |
| 2020-10-27 19:30 | 18.9 |
| 2020-10-27 19:40 | 18.8 |
| 2020-10-27 19:50 | 18.6 |
| 2020-10-27 20:00 | 18.3 |
| 2020-10-27 20:10 | 18.1 |
| 2020-10-27 20:20 | 18.1 |
| 2020-10-27 20:30 | 17.9 |
| 2020-10-27 20:40 | 17.6 |
| 2020-10-27 20:50 | 17.6 |
| 2020-10-27 21:00 | 17.4 |
| 2020-10-27 21:10 | 17.4 |
| 2020-10-27 21:20 | 17.3 |
| 2020-10-27 21:30 | 17.1 |
| 2020-10-27 21:40 | 17.1 |
| 2020-10-27 21:50 | 17.1 |
| 2020-10-27 22:00 | 17.1 |
| 2020-10-27 22:10 | 16.8 |
| 2020-10-27 22:20 | 16.7 |
| 2020-10-27 22:30 | 16.4 |
| 2020-10-27 22:40 | 16.3 |
| 2020-10-27 22:50 | 15.9 |
| 2020-10-27 23:00 | 15.9 |
| 2020-10-27 23:10 | 15.9 |
| 2020-10-27 23:20 | 15.9 |
| 2020-10-27 23:30 | 15.7 |
| 2020-10-27 23:40 | 15.6 |
| 2020-10-27 23:50 | 15.6 |
| 2020-10-28 00:00 | 15.5 |
| 2020-10-28 00:10 | 15.4 |
| 2020-10-28 00:20 | 15.2 |
| 2020-10-28 00:30 | 15.3 |
| 2020-10-28 00:40 | 15.2 |
| 2020-10-28 00:50 | 15.1 |
| 2020-10-28 01:00 | 15   |
| 2020-10-28 01:10 | 14.9 |
| 2020-10-28 01:20 | 14.8 |
| 2020-10-28 01:30 | 14.7 |
| 2020-10-28 01:40 | 14.3 |
| 2020-10-28 01:50 | 14.1 |
| 2020-10-28 02:00 | 14.4 |
| 2020-10-28 02:10 | 14.4 |
| 2020-10-28 02:20 | 14.3 |
| 2020-10-28 02:30 | 13.9 |
| 2020-10-28 02:40 | 13.8 |



|                  |      |
|------------------|------|
| 2020-10-28 02:50 | 13.7 |
| 2020-10-28 03:00 | 13.6 |
| 2020-10-28 03:10 | 13.4 |
| 2020-10-28 03:20 | 13.1 |
| 2020-10-28 03:30 | 12.7 |
| 2020-10-28 03:40 | 12.6 |
| 2020-10-28 03:50 | 12.6 |
| 2020-10-28 04:00 | 12.5 |
| 2020-10-28 04:10 | 12.4 |
| 2020-10-28 04:20 | 12.7 |
| 2020-10-28 04:30 | 13.3 |
| 2020-10-28 04:40 | 13.6 |
| 2020-10-28 04:50 | 13.2 |
| 2020-10-28 05:00 | 12.4 |
| 2020-10-28 05:10 | 12.3 |
| 2020-10-28 05:20 | 12   |
| 2020-10-28 05:30 | 11.6 |
| 2020-10-28 05:40 | 11.8 |
| 2020-10-28 05:50 | 11.8 |
| 2020-10-28 06:00 | 11.9 |
| 2020-10-28 06:10 | 12.4 |
| 2020-10-28 06:20 | 12.7 |
| 2020-10-28 06:30 | 14.1 |
| 2020-10-28 06:40 | 15.3 |
| 2020-10-28 06:50 | 16.1 |
| 2020-10-28 07:00 | 16.6 |
| 2020-10-28 07:10 | 17.6 |
| 2020-10-28 07:20 | 17.8 |
| 2020-10-28 07:30 | 17.8 |
| 2020-10-28 07:40 | 17.9 |
| 2020-10-28 07:50 | 18.3 |
| 2020-10-28 08:00 | 18.4 |
| 2020-10-28 08:10 | 19.3 |
| 2020-10-28 08:20 | 19.6 |
| 2020-10-28 08:30 | 20.2 |
| 2020-10-28 08:40 | 20.3 |
| 2020-10-28 08:50 | 20.8 |
| 2020-10-28 09:00 | 20.7 |
| 2020-10-28 09:10 | 21.6 |
| 2020-10-28 09:20 | 21.4 |
| 2020-10-28 09:30 | 21.4 |
| 2020-10-28 09:40 | 22.3 |
| 2020-10-28 09:50 | 21.7 |
| 2020-10-28 10:00 | 22.3 |
| 2020-10-28 10:10 | 22.5 |
| 2020-10-28 10:20 | 22.9 |
| 2020-10-28 10:30 | 23.3 |
| 2020-10-28 10:40 | 23.4 |
| 2020-10-28 10:50 | 23.8 |
| 2020-10-28 11:00 | 23.4 |



|                  |      |
|------------------|------|
| 2020-10-28 11:10 | 24.2 |
| 2020-10-28 11:20 | 24.4 |
| 2020-10-28 11:30 | 24.9 |
| 2020-10-28 11:40 | 24.8 |
| 2020-10-28 11:50 | 25.5 |
| 2020-10-28 12:00 | 25.6 |
| 2020-10-28 12:10 | 26.1 |
| 2020-10-28 12:20 | 26.4 |
| 2020-10-28 12:30 | 26.1 |
| 2020-10-28 12:40 | 26.3 |
| 2020-10-28 12:50 | 26.6 |
| 2020-10-28 13:00 | 27.7 |
| 2020-10-28 13:10 | 27.3 |
| 2020-10-28 13:20 | 27.6 |
| 2020-10-28 13:30 | 27.8 |
| 2020-10-28 13:40 | 27.7 |
| 2020-10-28 13:50 | 28   |
| 2020-10-28 14:00 | 30.1 |
| 2020-10-28 14:10 | 27.8 |
| 2020-10-28 14:20 | 28.1 |
| 2020-10-28 14:30 | 28.5 |
| 2020-10-28 14:40 | 29.3 |
| 2020-10-28 14:50 | 29.3 |
| 2020-10-28 15:00 | 29.9 |
| 2020-10-28 15:10 | 29.4 |
| 2020-10-28 15:20 | 29   |
| 2020-10-28 15:30 | 29.9 |
| 2020-10-28 15:40 | 30.1 |
| 2020-10-28 15:50 | 29.4 |
| 2020-10-28 16:00 | 28.8 |
| 2020-10-28 16:10 | 29.7 |
| 2020-10-28 16:20 | 29.4 |
| 2020-10-28 16:30 | 30   |
| 2020-10-28 16:40 | 30   |
| 2020-10-28 16:50 | 30.1 |
| 2020-10-28 17:00 | 29.2 |
| 2020-10-28 17:10 | 29.3 |
| 2020-10-28 17:20 | 29.1 |
| 2020-10-28 17:30 | 28.9 |
| 2020-10-28 17:40 | 28.9 |
| 2020-10-28 17:50 | 29.1 |
| 2020-10-28 18:00 | 28.2 |
| 2020-10-28 18:10 | 27.8 |
| 2020-10-28 18:20 | 26   |
| 2020-10-28 18:30 | 25.3 |
| 2020-10-28 18:40 | 24.8 |
| 2020-10-28 18:50 | 23.9 |
| 2020-10-28 19:00 | 23   |
| 2020-10-28 19:10 | 22.8 |
| 2020-10-28 19:20 | 22.6 |



|                  |      |
|------------------|------|
| 2020-10-28 19:30 | 22.6 |
| 2020-10-28 19:40 | 22.9 |
| 2020-10-28 19:50 | 22.1 |
| 2020-10-28 20:00 | 21   |
| 2020-10-28 20:10 | 21.3 |
| 2020-10-28 20:20 | 20.8 |
| 2020-10-28 20:30 | 20   |
| 2020-10-28 20:40 | 19.9 |
| 2020-10-28 20:50 | 19.9 |
| 2020-10-28 21:00 | 20.8 |
| 2020-10-28 21:10 | 20.6 |
| 2020-10-28 21:20 | 19.8 |
| 2020-10-28 21:30 | 19.9 |
| 2020-10-28 21:30 | 20.1 |
| 2020-10-28 21:40 | 19.6 |
| 2020-10-28 21:50 | 20.2 |
| 2020-10-28 22:00 | 19.1 |
| 2020-10-28 22:10 | 19.8 |
| 2020-10-28 22:20 | 20.4 |
| 2020-10-28 22:30 | 19.4 |
| 2020-10-28 22:40 | 18.4 |
| 2020-10-28 22:50 | 18.4 |
| 2020-10-28 23:00 | 19   |
| 2020-10-28 23:10 | 19.4 |
| 2020-10-28 23:20 | 19.5 |
| 2020-10-28 23:30 | 19.5 |
| 2020-10-28 23:40 | 19.4 |
| 2020-10-28 23:50 | 19.1 |
| 2020-10-29 00:00 | 18.4 |
| 2020-10-29 00:10 | 17.5 |
| 2020-10-29 00:20 | 17.8 |
| 2020-10-29 00:30 | 18.9 |
| 2020-10-29 00:40 | 20.2 |
| 2020-10-29 00:50 | 19.1 |
| 2020-10-29 01:00 | 18.7 |
| 2020-10-29 01:10 | 18.6 |
| 2020-10-29 01:20 | 18.9 |
| 2020-10-29 01:30 | 19.1 |
| 2020-10-29 01:40 | 19.1 |
| 2020-10-29 01:50 | 19.6 |
| 2020-10-29 02:00 | 19.2 |
| 2020-10-29 02:10 | 18.1 |
| 2020-10-29 02:20 | 18.1 |
| 2020-10-29 02:30 | 18.6 |
| 2020-10-29 02:40 | 18.4 |
| 2020-10-29 02:50 | 18.3 |
| 2020-10-29 03:00 | 18   |
| 2020-10-29 03:10 | 17.9 |
| 2020-10-29 03:20 | 18.2 |
| 2020-10-29 03:30 | 17.8 |



|                  |      |
|------------------|------|
| 2020-10-29 03:40 | 17.9 |
| 2020-10-29 03:50 | 18.3 |
| 2020-10-29 04:00 | 17.9 |
| 2020-10-29 04:10 | 17.8 |
| 2020-10-29 04:20 | 17.6 |
| 2020-10-29 04:30 | 17.3 |
| 2020-10-29 04:40 | 17.3 |
| 2020-10-29 04:50 | 16.8 |
| 2020-10-29 05:00 | 16.9 |
| 2020-10-29 05:10 | 16.4 |
| 2020-10-29 05:20 | 16.3 |
| 2020-10-29 05:30 | 15.9 |
| 2020-10-29 05:40 | 15.4 |
| 2020-10-29 05:50 | 15   |
| 2020-10-29 06:00 | 15   |
| 2020-10-29 06:10 | 15.2 |
| 2020-10-29 06:20 | 15.6 |
| 2020-10-29 06:30 | 16.2 |
| 2020-10-29 06:40 | 16.8 |
| 2020-10-29 06:50 | 17.4 |
| 2020-10-29 07:00 | 17.5 |
| 2020-10-29 07:10 | 17.5 |
| 2020-10-29 07:20 | 17.4 |
| 2020-10-29 07:30 | 17.6 |
| 2020-10-29 07:40 | 17.6 |
| 2020-10-29 07:50 | 17.9 |
| 2020-10-29 08:00 | 18.3 |
| 2020-10-29 08:10 | 18.5 |
| 2020-10-29 08:20 | 18.8 |
| 2020-10-29 08:30 | 18.8 |
| 2020-10-29 08:40 | 19.3 |
| 2020-10-29 08:50 | 19.5 |
| 2020-10-29 09:00 | 19.8 |
| 2020-10-29 09:10 | 20.3 |
| 2020-10-29 09:20 | 20.7 |
| 2020-10-29 09:30 | 20.8 |
| 2020-10-29 09:40 | 21.4 |
| 2020-10-29 09:50 | 20.6 |
| 2020-10-29 10:00 | 20.9 |
| 2020-10-29 10:10 | 20.7 |
| 2020-10-29 10:20 | 21.1 |
| 2020-10-29 10:30 | 21.1 |
| 2020-10-29 10:40 | 21.2 |
| 2020-10-29 10:50 | 21.3 |
| 2020-10-29 11:00 | 21.3 |
| 2020-10-29 11:10 | 21.7 |
| 2020-10-29 11:20 | 21.9 |
| 2020-10-29 11:30 | 22   |
| 2020-10-29 11:40 | 22.3 |
| 2020-10-29 11:50 | 22.5 |



|                  |      |
|------------------|------|
| 2020-10-29 12:00 | 22.6 |
| 2020-10-29 12:10 | 22.6 |
| 2020-10-29 12:20 | 22.4 |
| 2020-10-29 12:30 | 23   |
| 2020-10-29 12:40 | 22.9 |
| 2020-10-29 12:50 | 23.4 |
| 2020-10-29 13:00 | 23.4 |
| 2020-10-29 13:10 | 23.3 |
| 2020-10-29 13:20 | 23.1 |
| 2020-10-29 13:20 | 23.3 |
| 2020-10-29 13:30 | 23   |
| 2020-10-29 13:40 | 23.8 |
| 2020-10-29 13:50 | 24.3 |
| 2020-10-29 14:00 | 24   |
| 2020-10-29 14:10 | 23.6 |
| 2020-10-29 14:20 | 23.7 |
| 2020-10-29 14:30 | 24.3 |
| 2020-10-29 14:40 | 24.1 |
| 2020-10-29 14:50 | 24.4 |
| 2020-10-29 15:00 | 24.4 |
| 2020-10-29 15:10 | 24.2 |
| 2020-10-29 15:20 | 24.1 |
| 2020-10-29 15:30 | 23.3 |
| 2020-10-29 15:40 | 23.4 |
| 2020-10-29 15:50 | 22.9 |
| 2020-10-29 16:00 | 23.1 |
| 2020-10-29 16:10 | 22.9 |
| 2020-10-29 16:20 | 22.8 |
| 2020-10-29 16:30 | 22.4 |
| 2020-10-29 16:40 | 22.4 |
| 2020-10-29 16:50 | 22.1 |
| 2020-10-29 17:00 | 21.9 |
| 2020-10-29 17:10 | 21.9 |
| 2020-10-29 17:20 | 21.7 |
| 2020-10-29 17:30 | 21.4 |
| 2020-10-29 17:40 | 21.2 |
| 2020-10-29 17:50 | 20   |
| 2020-10-29 18:00 | 19   |
| 2020-10-29 18:10 | 18.8 |
| 2020-10-29 18:20 | 18.3 |
| 2020-10-29 18:30 | 17.9 |
| 2020-10-29 18:40 | 17.2 |
| 2020-10-29 18:50 | 16.8 |
| 2020-10-29 19:00 | 16.4 |
| 2020-10-29 19:10 | 16.1 |
| 2020-10-29 19:20 | 15.8 |
| 2020-10-29 19:30 | 15.5 |
| 2020-10-29 19:40 | 15.1 |
| 2020-10-29 19:50 | 15.1 |
| 2020-10-29 20:00 | 14.9 |



|                  |      |
|------------------|------|
| 2020-10-29 20:10 | 14.8 |
| 2020-10-29 20:20 | 14.7 |
| 2020-10-29 20:30 | 14.6 |
| 2020-10-29 20:40 | 14.6 |
| 2020-10-29 20:50 | 14.6 |
| 2020-10-29 21:00 | 14.6 |
| 2020-10-29 21:10 | 14.4 |
| 2020-10-29 21:20 | 14.4 |
| 2020-10-29 21:30 | 14.3 |
| 2020-10-29 21:40 | 14.3 |
| 2020-10-29 21:50 | 14.1 |
| 2020-10-29 22:00 | 13.9 |
| 2020-10-29 22:10 | 13.9 |
| 2020-10-29 22:20 | 13.8 |
| 2020-10-29 22:30 | 13.8 |
| 2020-10-29 22:40 | 13.8 |
| 2020-10-29 22:50 | 13.7 |
| 2020-10-29 23:00 | 13.7 |
| 2020-10-29 23:10 | 13.6 |
| 2020-10-29 23:20 | 13.6 |
| 2020-10-29 23:30 | 13.5 |
| 2020-10-29 23:40 | 13.3 |
| 2020-10-29 23:50 | 13.3 |
| 2020-10-30 00:00 | 13.1 |
| 2020-10-30 00:10 | 12.9 |
| 2020-10-30 00:20 | 12.9 |
| 2020-10-30 00:30 | 12.9 |
| 2020-10-30 00:40 | 12.8 |
| 2020-10-30 00:50 | 12.8 |
| 2020-10-30 01:00 | 12.8 |
| 2020-10-30 01:10 | 12.8 |
| 2020-10-30 01:20 | 12.7 |
| 2020-10-30 01:30 | 12.6 |
| 2020-10-30 01:40 | 12.5 |
| 2020-10-30 01:50 | 12.3 |
| 2020-10-30 02:00 | 12.1 |
| 2020-10-30 02:10 | 12.1 |
| 2020-10-30 02:20 | 12   |
| 2020-10-30 02:30 | 11.9 |
| 2020-10-30 02:40 | 11.9 |
| 2020-10-30 02:50 | 11.9 |
| 2020-10-30 03:00 | 11.9 |
| 2020-10-30 03:10 | 11.9 |
| 2020-10-30 03:20 | 11.8 |
| 2020-10-30 03:30 | 11.9 |
| 2020-10-30 03:40 | 11.8 |
| 2020-10-30 03:50 | 11.9 |
| 2020-10-30 04:00 | 11.8 |
| 2020-10-30 04:10 | 11.8 |
| 2020-10-30 04:20 | 11.8 |



|                  |      |
|------------------|------|
| 2020-10-30 04:30 | 11.7 |
| 2020-10-30 04:40 | 11.4 |
| 2020-10-30 04:50 | 11.3 |
| 2020-10-30 05:00 | 11.1 |
| 2020-10-30 05:10 | 11.1 |
| 2020-10-30 05:20 | 11   |
| 2020-10-30 05:30 | 11.1 |
| 2020-10-30 05:40 | 11.1 |
| 2020-10-30 05:50 | 10.9 |
| 2020-10-30 06:00 | 10.8 |
| 2020-10-30 06:10 | 10.8 |
| 2020-10-30 06:20 | 10.9 |
| 2020-10-30 06:30 | 11.1 |
| 2020-10-30 06:40 | 11.2 |
| 2020-10-30 06:50 | 11.3 |
| 2020-10-30 07:00 | 11.4 |
| 2020-10-30 07:10 | 11.6 |
| 2020-10-30 07:20 | 11.8 |
| 2020-10-30 07:30 | 11.9 |
| 2020-10-30 07:40 | 12.2 |
| 2020-10-30 07:50 | 12.4 |
| 2020-10-30 08:00 | 12.7 |
| 2020-10-30 08:10 | 13.2 |
| 2020-10-30 08:20 | 13.5 |
| 2020-10-30 08:30 | 13.7 |
| 2020-10-30 08:50 | 14.3 |
| 2020-10-30 09:00 | 15.1 |
| 2020-10-30 09:10 | 15.4 |
| 2020-10-30 09:20 | 16.3 |
| 2020-10-30 09:30 | 16.6 |
| 2020-10-30 09:40 | 16.2 |
| 2020-10-30 09:50 | 17.3 |
| 2020-10-30 10:00 | 17.3 |
| 2020-10-30 10:10 | 18.1 |
| 2020-10-30 10:20 | 19.4 |
| 2020-10-30 10:30 | 19.4 |
| 2020-10-30 10:40 | 20   |
| 2020-10-30 10:50 | 19.8 |
| 2020-10-30 11:00 | 21.2 |
| 2020-10-30 11:10 | 21.3 |
| 2020-10-30 11:20 | 22.3 |
| 2020-10-30 11:30 | 23.5 |
| 2020-10-30 11:40 | 22.4 |
| 2020-10-30 11:50 | 23.2 |
| 2020-10-30 12:00 | 23.1 |
| 2020-10-30 12:10 | 23.8 |
| 2020-10-30 12:20 | 24.7 |
| 2020-10-30 12:30 | 23.9 |
| 2020-10-30 12:40 | 25.7 |
| 2020-10-30 12:50 | 25   |



|                  |      |
|------------------|------|
| 2020-10-30 13:00 | 24   |
| 2020-10-30 13:10 | 24.7 |
| 2020-10-30 13:20 | 24.4 |
| 2020-10-30 13:30 | 25.6 |
| 2020-10-30 13:40 | 25.4 |
| 2020-10-30 13:50 | 25.7 |
| 2020-10-30 14:00 | 26   |
| 2020-10-30 14:10 | 24.9 |
| 2020-10-30 14:20 | 26.9 |
| 2020-10-30 14:20 | 27.3 |
| 2020-10-30 14:30 | 25.9 |
| 2020-10-30 14:40 | 24.6 |
| 2020-10-30 14:50 | 25.4 |
| 2020-10-30 15:00 | 24.9 |
| 2020-10-30 15:10 | 24.8 |
| 2020-10-30 15:20 | 23.6 |
| 2020-10-30 15:30 | 26.4 |
| 2020-10-30 15:40 | 27.2 |
| 2020-10-30 15:50 | 24.3 |
| 2020-10-30 16:00 | 24.3 |
| 2020-10-30 16:10 | 25.9 |
| 2020-10-30 16:20 | 26.1 |
| 2020-10-30 16:30 | 26.6 |
| 2020-10-30 16:40 | 25.8 |
| 2020-10-30 16:50 | 24   |
| 2020-10-30 17:00 | 23.1 |
| 2020-10-30 17:10 | 24.1 |
| 2020-10-30 17:20 | 24.5 |
| 2020-10-30 17:30 | 24.9 |
| 2020-10-30 17:40 | 24.6 |
| 2020-10-30 17:50 | 24.4 |
| 2020-10-30 18:00 | 23   |
| 2020-10-30 18:10 | 22.6 |
| 2020-10-30 18:20 | 21.8 |
| 2020-10-30 18:30 | 21.3 |
| 2020-10-30 18:40 | 20.9 |
| 2020-10-30 18:50 | 20.6 |
| 2020-10-30 19:00 | 20.4 |
| 2020-10-30 19:10 | 20.2 |
| 2020-10-30 19:20 | 19.9 |
| 2020-10-30 19:30 | 19.7 |
| 2020-10-30 19:40 | 19.4 |
| 2020-10-30 19:50 | 19.3 |
| 2020-10-30 20:00 | 19.2 |
| 2020-10-30 20:10 | 19.2 |
| 2020-10-30 20:20 | 19.1 |
| 2020-10-30 20:30 | 19.1 |
| 2020-10-30 20:40 | 18.9 |
| 2020-10-30 20:50 | 18.4 |
| 2020-10-30 21:00 | 18.3 |



|                  |      |
|------------------|------|
| 2020-10-30 21:10 | 18.1 |
| 2020-10-30 21:20 | 17.9 |
| 2020-10-30 21:30 | 17.9 |
| 2020-10-30 21:40 | 17.7 |
| 2020-10-30 21:50 | 17.4 |
| 2020-10-30 22:00 | 16.9 |
| 2020-10-30 22:10 | 16.6 |
| 2020-10-30 22:20 | 16.6 |
| 2020-10-30 22:30 | 16.5 |
| 2020-10-30 22:40 | 16.5 |
| 2020-10-30 22:50 | 16.5 |
| 2020-10-30 23:00 | 16.3 |
| 2020-10-30 23:10 | 16.2 |
| 2020-10-30 23:20 | 16.1 |
| 2020-10-30 23:30 | 16.1 |
| 2020-10-30 23:40 | 16   |
| 2020-10-30 23:50 | 15.9 |
| 2020-10-31 00:00 | 15.9 |
| 2020-10-31 00:10 | 15.8 |
| 2020-10-31 00:20 | 15.8 |
| 2020-10-31 00:30 | 15.8 |
| 2020-10-31 00:40 | 15.8 |
| 2020-10-31 00:50 | 15.8 |
| 2020-10-31 01:00 | 15.8 |
| 2020-10-31 01:10 | 15.9 |
| 2020-10-31 01:20 | 16.1 |
| 2020-10-31 01:30 | 16.1 |
| 2020-10-31 01:40 | 16.2 |
| 2020-10-31 01:50 | 16.1 |
| 2020-10-31 02:00 | 16   |
| 2020-10-31 02:10 | 15.9 |
| 2020-10-31 02:20 | 15.7 |
| 2020-10-31 02:30 | 15.5 |
| 2020-10-31 02:40 | 15.4 |
| 2020-10-31 02:50 | 15.2 |
| 2020-10-31 03:00 | 14.9 |
| 2020-10-31 03:10 | 14.7 |
| 2020-10-31 03:20 | 14.6 |
| 2020-10-31 03:30 | 14.4 |
| 2020-10-31 03:40 | 14.4 |
| 2020-10-31 03:50 | 14.3 |
| 2020-10-31 04:00 | 14.3 |
| 2020-10-31 04:10 | 14.1 |
| 2020-10-31 04:20 | 13.9 |
| 2020-10-31 04:30 | 13.7 |
| 2020-10-31 04:40 | 13.6 |
| 2020-10-31 04:50 | 13.6 |
| 2020-10-31 05:00 | 13.4 |
| 2020-10-31 05:10 | 13.3 |
| 2020-10-31 05:20 | 13.2 |



|                  |      |
|------------------|------|
| 2020-10-31 05:30 | 13.1 |
| 2020-10-31 05:40 | 13.1 |
| 2020-10-31 05:50 | 13.1 |
| 2020-10-31 06:00 | 13.1 |
| 2020-10-31 06:10 | 13.1 |
| 2020-10-31 06:20 | 13.2 |
| 2020-10-31 06:30 | 13.1 |
| 2020-10-31 06:40 | 13.4 |
| 2020-10-31 06:50 | 14.2 |
| 2020-10-31 07:00 | 13.8 |
| 2020-10-31 07:10 | 15.3 |
| 2020-10-31 07:20 | 15.5 |
| 2020-10-31 07:30 | 15.3 |
| 2020-10-31 07:40 | 15.3 |
| 2020-10-31 07:50 | 16.4 |
| 2020-10-31 08:00 | 15.6 |
| 2020-10-31 08:10 | 15.6 |
| 2020-10-31 08:20 | 16.3 |
| 2020-10-31 08:30 | 17.3 |
| 2020-10-31 08:40 | 18.5 |
| 2020-10-31 08:50 | 17.4 |
| 2020-10-31 09:00 | 17.9 |
| 2020-10-31 09:10 | 17.9 |
| 2020-10-31 09:20 | 18.9 |
| 2020-10-31 09:30 | 21.1 |
| 2020-10-31 09:40 | 18.7 |
| 2020-10-31 09:50 | 18.8 |
| 2020-10-31 10:00 | 17.9 |
| 2020-10-31 10:10 | 18   |
| 2020-10-31 10:20 | 17.6 |
| 2020-10-31 10:30 | 16.6 |
| 2020-10-31 10:40 | 16.4 |
| 2020-10-31 10:50 | 18.2 |
| 2020-10-31 11:00 | 17.6 |
| 2020-10-31 11:10 | 18.4 |
| 2020-10-31 11:20 | 17.9 |
| 2020-10-31 11:30 | 17.4 |
| 2020-10-31 11:40 | 16.6 |
| 2020-10-31 11:50 | 16.6 |
| 2020-10-31 12:00 | 16.4 |
| 2020-10-31 12:10 | 16.4 |
| 2020-10-31 12:20 | 16.4 |
| 2020-10-31 12:30 | 16.6 |
| 2020-10-31 12:40 | 18.3 |
| 2020-10-31 12:50 | 19.3 |
| 2020-10-31 13:00 | 19.9 |
| 2020-10-31 13:10 | 20.9 |
| 2020-10-31 13:20 | 20.6 |
| 2020-10-31 13:30 | 20.6 |
| 2020-10-31 13:40 | 21.8 |



|                  |      |
|------------------|------|
| 2020-10-31 13:50 | 23.5 |
| 2020-10-31 14:00 | 22.4 |
| 2020-10-31 14:10 | 23.1 |
| 2020-10-31 14:20 | 23.6 |
| 2020-10-31 14:30 | 23.9 |
| 2020-10-31 14:40 | 24   |
| 2020-10-31 14:50 | 24.6 |
| 2020-10-31 15:00 | 24.9 |
| 2020-10-31 15:10 | 22.9 |
| 2020-10-31 15:20 | 23.3 |
| 2020-10-31 15:30 | 23.6 |
| 2020-10-31 15:40 | 21.9 |
| 2020-10-31 15:50 | 21.6 |
| 2020-10-31 16:00 | 18.1 |
| 2020-10-31 16:10 | 17.3 |
| 2020-10-31 16:20 | 15.6 |
| 2020-10-31 16:30 | 14.1 |
| 2020-10-31 16:40 | 14.3 |
| 2020-10-31 16:50 | 15   |
| 2020-10-31 17:00 | 16.1 |
| 2020-10-31 17:10 | 16.4 |
| 2020-10-31 17:20 | 15.9 |
| 2020-10-31 17:30 | 16.9 |
| 2020-10-31 17:40 | 17.1 |
| 2020-10-31 17:50 | 17   |
| 2020-10-31 18:00 | 17.4 |
| 2020-10-31 18:10 | 16.2 |
| 2020-10-31 18:20 | 15.4 |
| 2020-10-31 18:30 | 14.9 |
| 2020-10-31 18:40 | 14.6 |
| 2020-10-31 18:50 | 14.3 |
| 2020-10-31 19:00 | 14.1 |
| 2020-10-31 19:10 | 13.8 |
| 2020-10-31 19:20 | 13.9 |
| 2020-10-31 19:30 | 13.7 |
| 2020-10-31 19:40 | 13.4 |
| 2020-10-31 19:50 | 13.2 |
| 2020-10-31 20:00 | 13.1 |
| 2020-10-31 20:10 | 13   |
| 2020-10-31 20:20 | 12.9 |
| 2020-10-31 20:30 | 12.9 |
| 2020-10-31 20:40 | 12.9 |
| 2020-10-31 20:50 | 12.8 |
| 2020-10-31 21:00 | 12.7 |
| 2020-10-31 21:10 | 12.6 |
| 2020-10-31 21:20 | 12.6 |
| 2020-10-31 21:30 | 12.6 |
| 2020-10-31 21:40 | 12.4 |
| 2020-10-31 21:50 | 12.3 |
| 2020-10-31 22:00 | 12.2 |



|                  |      |
|------------------|------|
| 2020-10-31 22:10 | 12.1 |
| 2020-10-31 22:20 | 12.1 |
| 2020-10-31 22:30 | 12   |
| 2020-10-31 22:40 | 11.9 |
| 2020-10-31 22:50 | 11.9 |
| 2020-10-31 23:00 | 11.9 |
| 2020-10-31 23:10 | 11.8 |
| 2020-10-31 23:20 | 11.8 |
| 2020-10-31 23:30 | 11.6 |
| 2020-10-31 23:40 | 11.5 |
| 2020-10-31 23:50 | 11.4 |
| 2020-11-01 00:00 | 11.4 |
| 2020-11-01 00:10 | 11.3 |
| 2020-11-01 00:20 | 10.9 |
| 2020-11-01 00:30 | 10.9 |
| 2020-11-01 00:40 | 10.8 |
| 2020-11-01 00:50 | 10.6 |
| 2020-11-01 01:00 | 10.7 |
| 2020-11-01 01:10 | 10.6 |
| 2020-11-01 01:20 | 10.6 |
| 2020-11-01 01:30 | 10.5 |
| 2020-11-01 01:40 | 10.4 |
| 2020-11-01 01:50 | 10.3 |
| 2020-11-01 02:00 | 10.3 |
| 2020-11-01 02:10 | 10.3 |
| 2020-11-01 02:20 | 10.3 |
| 2020-11-01 02:30 | 10.1 |
| 2020-11-01 02:40 | 10.1 |
| 2020-11-01 02:50 | 10.1 |
| 2020-11-01 03:00 | 10.1 |
| 2020-11-01 03:10 | 10.1 |
| 2020-11-01 03:20 | 10.1 |
| 2020-11-01 03:30 | 10.1 |
| 2020-11-01 03:40 | 10.1 |
| 2020-11-01 03:50 | 10.2 |
| 2020-11-01 04:00 | 10.1 |
| 2020-11-01 04:10 | 9.9  |
| 2020-11-01 04:20 | 9.8  |
| 2020-11-01 04:30 | 9.7  |
| 2020-11-01 04:40 | 9.6  |
| 2020-11-01 04:50 | 9.5  |
| 2020-11-01 05:00 | 9.5  |
| 2020-11-01 05:10 | 9.5  |
| 2020-11-01 05:20 | 9.4  |
| 2020-11-01 05:30 | 9.4  |
| 2020-11-01 05:40 | 9.4  |
| 2020-11-01 05:50 | 9.4  |
| 2020-11-01 06:00 | 9.4  |
| 2020-11-01 06:10 | 9.6  |
| 2020-11-01 06:20 | 10   |



|                  |      |
|------------------|------|
| 2020-11-01 06:30 | 10.3 |
| 2020-11-01 06:40 | 10.9 |
| 2020-11-01 06:50 | 11   |
| 2020-11-01 07:00 | 11.8 |
| 2020-11-01 07:10 | 12.1 |
| 2020-11-01 07:20 | 12.3 |
| 2020-11-01 07:30 | 12.8 |
| 2020-11-01 07:40 | 13.9 |
| 2020-11-01 07:50 | 14.2 |
| 2020-11-01 08:00 | 14.9 |
| 2020-11-01 08:10 | 15.3 |
| 2020-11-01 08:20 | 15.9 |
| 2020-11-01 08:30 | 16.1 |
| 2020-11-01 08:40 | 16.4 |
| 2020-11-01 08:50 | 16.6 |
| 2020-11-01 09:00 | 17.1 |
| 2020-11-01 09:10 | 17.8 |
| 2020-11-01 09:20 | 18.3 |
| 2020-11-01 09:30 | 18.3 |
| 2020-11-01 09:40 | 18.6 |
| 2020-11-01 09:50 | 18.7 |
| 2020-11-01 10:00 | 19.7 |
| 2020-11-01 10:10 | 18.9 |
| 2020-11-01 10:20 | 19.4 |
| 2020-11-01 10:30 | 20.1 |
| 2020-11-01 10:40 | 20.8 |
| 2020-11-01 10:50 | 21   |
| 2020-11-01 11:00 | 21.1 |
| 2020-11-01 11:10 | 21.6 |
| 2020-11-01 11:20 | 21.6 |
| 2020-11-01 11:30 | 23   |
| 2020-11-01 11:40 | 22.4 |
| 2020-11-01 11:50 | 21.6 |
| 2020-11-01 12:00 | 21   |
| 2020-11-01 12:10 | 23.5 |
| 2020-11-01 12:20 | 21.7 |
| 2020-11-01 12:30 | 22.1 |
| 2020-11-01 12:40 | 23.1 |
| 2020-11-01 12:50 | 24.9 |
| 2020-11-01 13:00 | 23.7 |
| 2020-11-01 13:10 | 23.1 |
| 2020-11-01 13:20 | 24.3 |
| 2020-11-01 13:30 | 24.9 |
| 2020-11-01 13:40 | 26.6 |
| 2020-11-01 13:50 | 22.5 |
| 2020-11-01 14:00 | 25.6 |
| 2020-11-01 14:10 | 24.1 |
| 2020-11-01 14:20 | 26.3 |
| 2020-11-01 14:30 | 24.4 |
| 2020-11-01 14:40 | 24.9 |



|                  |      |
|------------------|------|
| 2020-11-01 14:50 | 26.4 |
| 2020-11-01 15:00 | 22.6 |
| 2020-11-01 15:10 | 25.2 |
| 2020-11-01 15:20 | 27.1 |
| 2020-11-01 15:30 | 25.5 |
| 2020-11-01 15:40 | 27.1 |
| 2020-11-01 15:50 | 26.1 |
| 2020-11-01 16:00 | 25.1 |
| 2020-11-01 16:10 | 23   |
| 2020-11-01 16:20 | 26.1 |
| 2020-11-01 16:30 | 25.4 |
| 2020-11-01 16:40 | 24.6 |
| 2020-11-01 16:50 | 25.3 |
| 2020-11-01 17:00 | 24.8 |
| 2020-11-01 17:10 | 24.6 |
| 2020-11-01 17:20 | 25   |
| 2020-11-01 17:30 | 24.3 |
| 2020-11-01 17:40 | 23.9 |
| 2020-11-01 17:50 | 24.1 |
| 2020-11-01 18:00 | 23.3 |
| 2020-11-01 18:10 | 22.4 |
| 2020-11-01 18:20 | 21.6 |
| 2020-11-01 18:30 | 20.9 |
| 2020-11-01 18:40 | 20.4 |
| 2020-11-01 18:50 | 20   |
| 2020-11-01 19:00 | 19.7 |
| 2020-11-01 19:10 | 19.2 |
| 2020-11-01 19:20 | 18.6 |
| 2020-11-01 19:30 | 18.4 |
| 2020-11-01 19:40 | 18.1 |
| 2020-11-01 19:50 | 17.8 |
| 2020-11-01 20:00 | 16.9 |
| 2020-11-01 20:10 | 16.1 |
| 2020-11-01 20:20 | 15.9 |
| 2020-11-01 20:30 | 15.9 |
| 2020-11-01 20:40 | 16.5 |
| 2020-11-01 20:50 | 17.1 |
| 2020-11-01 21:00 | 16.8 |
| 2020-11-01 21:10 | 16.4 |
| 2020-11-01 21:20 | 16.3 |
| 2020-11-01 21:30 | 16.2 |
| 2020-11-01 21:40 | 15.9 |
| 2020-11-01 21:50 | 15.8 |
| 2020-11-01 22:00 | 15.6 |
| 2020-11-01 22:10 | 15.4 |
| 2020-11-01 22:20 | 15.2 |
| 2020-11-01 22:30 | 15   |
| 2020-11-01 22:40 | 14.8 |
| 2020-11-01 22:50 | 14.6 |
| 2020-11-01 23:00 | 14.4 |



|                  |      |
|------------------|------|
| 2020-11-01 23:10 | 14.3 |
| 2020-11-01 23:20 | 14.1 |
| 2020-11-01 23:30 | 13.9 |
| 2020-11-01 23:40 | 13.9 |
| 2020-11-01 23:50 | 13.8 |
| 2020-11-02 00:00 | 13.5 |
| 2020-11-02 00:10 | 13.3 |
| 2020-11-02 00:20 | 13.1 |
| 2020-11-02 00:40 | 12.8 |
| 2020-11-02 00:50 | 12.6 |
| 2020-11-02 01:00 | 12.4 |
| 2020-11-02 01:10 | 12.3 |
| 2020-11-02 01:20 | 12.1 |
| 2020-11-02 01:30 | 11.9 |
| 2020-11-02 01:40 | 11.8 |
| 2020-11-02 01:50 | 11.7 |
| 2020-11-02 02:00 | 11.5 |
| 2020-11-02 02:10 | 11.4 |
| 2020-11-02 02:20 | 11.3 |
| 2020-11-02 02:30 | 11.3 |
| 2020-11-02 02:40 | 11.1 |
| 2020-11-02 02:50 | 11   |
| 2020-11-02 03:00 | 11.1 |
| 2020-11-02 03:10 | 11   |
| 2020-11-02 03:20 | 10.9 |
| 2020-11-02 03:30 | 10.9 |
| 2020-11-02 03:40 | 10.9 |
| 2020-11-02 03:50 | 10.8 |
| 2020-11-02 04:00 | 10.8 |
| 2020-11-02 04:10 | 10.8 |
| 2020-11-02 04:20 | 10.7 |
| 2020-11-02 04:30 | 10.7 |
| 2020-11-02 04:40 | 10.6 |
| 2020-11-02 04:50 | 10.4 |
| 2020-11-02 05:00 | 10.3 |
| 2020-11-02 05:10 | 10.2 |
| 2020-11-02 05:20 | 10.2 |
| 2020-11-02 05:30 | 10.1 |
| 2020-11-02 05:40 | 10.4 |
| 2020-11-02 05:50 | 10.4 |
| 2020-11-02 06:00 | 10.8 |
| 2020-11-02 06:10 | 11.4 |
| 2020-11-02 06:20 | 12.2 |
| 2020-11-02 06:30 | 12.9 |
| 2020-11-02 06:40 | 13.3 |
| 2020-11-02 06:50 | 13.8 |
| 2020-11-02 07:00 | 14   |
| 2020-11-02 07:10 | 14.6 |
| 2020-11-02 07:20 | 14.6 |
| 2020-11-02 07:30 | 14.7 |



|                  |      |
|------------------|------|
| 2020-11-02 07:30 | 14.9 |
| 2020-11-02 07:40 | 15.4 |
| 2020-11-02 07:50 | 16.1 |
| 2020-11-02 08:00 | 16.5 |
| 2020-11-02 08:10 | 16.4 |
| 2020-11-02 08:20 | 16.9 |
| 2020-11-02 08:30 | 17.8 |
| 2020-11-02 08:40 | 18.9 |
| 2020-11-02 08:50 | 18.9 |
| 2020-11-02 09:00 | 19.6 |
| 2020-11-02 09:10 | 19.4 |
| 2020-11-02 09:20 | 20.8 |
| 2020-11-02 09:30 | 21.8 |
| 2020-11-02 09:40 | 22.5 |
| 2020-11-02 09:50 | 22.8 |
| 2020-11-02 10:00 | 22.3 |
| 2020-11-02 10:10 | 21.9 |
| 2020-11-02 10:20 | 21.9 |
| 2020-11-02 10:30 | 22.8 |
| 2020-11-02 10:40 | 21.3 |
| 2020-11-02 10:50 | 23.9 |
| 2020-11-02 11:00 | 24.2 |
| 2020-11-02 11:10 | 24.6 |
| 2020-11-02 11:20 | 24.6 |
| 2020-11-02 11:30 | 25   |
| 2020-11-02 11:40 | 23.9 |
| 2020-11-02 11:50 | 25   |
| 2020-11-02 12:00 | 25.4 |
| 2020-11-02 12:10 | 24.5 |
| 2020-11-02 12:20 | 24   |
| 2020-11-02 12:30 | 25.7 |
| 2020-11-02 12:40 | 25.8 |
| 2020-11-02 12:50 | 26.6 |
| 2020-11-02 13:00 | 27.4 |
| 2020-11-02 13:10 | 26.6 |
| 2020-11-02 13:20 | 24.6 |
| 2020-11-02 13:30 | 27.6 |
| 2020-11-02 13:40 | 26.3 |
| 2020-11-02 13:50 | 24.6 |
| 2020-11-02 14:00 | 24.3 |
| 2020-11-02 14:10 | 24.8 |
| 2020-11-02 14:20 | 27.9 |
| 2020-11-02 14:30 | 30.6 |
| 2020-11-02 14:40 | 27.6 |
| 2020-11-02 14:50 | 25.3 |
| 2020-11-02 15:00 | 24.9 |
| 2020-11-02 15:10 | 24.1 |
| 2020-11-02 15:20 | 26.4 |
| 2020-11-02 15:30 | 24.9 |
| 2020-11-02 15:40 | 24.4 |



|                  |      |
|------------------|------|
| 2020-11-02 15:50 | 24.8 |
| 2020-11-02 16:00 | 25.8 |
| 2020-11-02 16:10 | 25.9 |
| 2020-11-02 16:20 | 25.6 |
| 2020-11-02 16:30 | 25.1 |
| 2020-11-02 16:40 | 25.9 |
| 2020-11-02 16:50 | 24.7 |
| 2020-11-02 17:00 | 23.8 |
| 2020-11-02 17:10 | 23.4 |
| 2020-11-02 17:20 | 23.6 |
| 2020-11-02 17:30 | 23.6 |
| 2020-11-02 17:40 | 23.8 |
| 2020-11-02 17:50 | 23.3 |
| 2020-11-02 18:00 | 24.3 |
| 2020-11-02 18:10 | 23.9 |
| 2020-11-02 18:20 | 22.9 |
| 2020-11-02 18:30 | 22.1 |
| 2020-11-02 18:40 | 21.6 |
| 2020-11-02 18:50 | 21.3 |
| 2020-11-02 19:00 | 20.8 |
| 2020-11-02 19:10 | 20.4 |
| 2020-11-02 19:20 | 19.8 |
| 2020-11-02 19:30 | 20.2 |
| 2020-11-02 19:40 | 20.1 |
| 2020-11-02 19:50 | 19.3 |
| 2020-11-02 20:00 | 19.1 |
| 2020-11-02 20:10 | 19.3 |
| 2020-11-02 20:20 | 18.8 |
| 2020-11-02 20:30 | 18.5 |
| 2020-11-02 20:40 | 18.8 |
| 2020-11-02 20:50 | 18.9 |
| 2020-11-02 21:00 | 19   |
| 2020-11-02 21:10 | 18.9 |
| 2020-11-02 21:20 | 18.6 |
| 2020-11-02 21:30 | 18.3 |
| 2020-11-02 21:40 | 17.8 |
| 2020-11-02 21:50 | 17.6 |
| 2020-11-02 22:00 | 17.3 |
| 2020-11-02 22:10 | 17.1 |
| 2020-11-02 22:20 | 17.1 |
| 2020-11-02 22:30 | 16.8 |
| 2020-11-02 22:40 | 16.4 |
| 2020-11-02 22:50 | 16.2 |
| 2020-11-02 23:00 | 16   |
| 2020-11-02 23:10 | 15.8 |
| 2020-11-02 23:20 | 15.8 |
| 2020-11-02 23:30 | 15.6 |
| 2020-11-02 23:40 | 15.4 |
| 2020-11-02 23:50 | 15.2 |
| 2020-11-03 00:00 | 14.9 |



|                  |      |
|------------------|------|
| 2020-11-03 00:10 | 14.8 |
| 2020-11-03 00:20 | 14.6 |
| 2020-11-03 00:30 | 14.4 |
| 2020-11-03 00:40 | 14.3 |
| 2020-11-03 00:50 | 14.2 |
| 2020-11-03 01:00 | 13.9 |
| 2020-11-03 01:10 | 13.8 |
| 2020-11-03 01:20 | 13.6 |
| 2020-11-03 01:30 | 13.5 |
| 2020-11-03 01:40 | 13.4 |
| 2020-11-03 01:50 | 13.3 |
| 2020-11-03 02:00 | 13.3 |
| 2020-11-03 02:10 | 13.2 |
| 2020-11-03 02:20 | 13   |
| 2020-11-03 02:30 | 12.9 |
| 2020-11-03 02:40 | 12.9 |
| 2020-11-03 02:50 | 12.9 |
| 2020-11-03 03:00 | 12.9 |
| 2020-11-03 03:10 | 12.8 |
| 2020-11-03 03:20 | 12.8 |
| 2020-11-03 03:30 | 12.7 |
| 2020-11-03 03:40 | 12.6 |
| 2020-11-03 03:50 | 12.5 |
| 2020-11-03 04:00 | 12.4 |
| 2020-11-03 04:10 | 12.4 |
| 2020-11-03 04:20 | 12.5 |
| 2020-11-03 04:30 | 12.5 |
| 2020-11-03 04:40 | 12.4 |
| 2020-11-03 04:50 | 12.3 |
| 2020-11-03 05:00 | 12.3 |
| 2020-11-03 05:10 | 12.1 |
| 2020-11-03 05:20 | 12.1 |
| 2020-11-03 05:30 | 12.1 |
| 2020-11-03 05:40 | 12.2 |
| 2020-11-03 05:50 | 12.4 |
| 2020-11-03 06:00 | 12.5 |
| 2020-11-03 06:10 | 13.3 |
| 2020-11-03 06:20 | 13.9 |
| 2020-11-03 06:30 | 14.6 |
| 2020-11-03 06:40 | 13.9 |
| 2020-11-03 06:50 | 14.6 |
| 2020-11-03 07:00 | 15.1 |
| 2020-11-03 07:10 | 15.6 |
| 2020-11-03 07:20 | 15.8 |
| 2020-11-03 07:30 | 15.8 |
| 2020-11-03 07:40 | 16.2 |
| 2020-11-03 07:50 | 16.7 |
| 2020-11-03 08:00 | 17.2 |
| 2020-11-03 08:10 | 17.4 |
| 2020-11-03 08:20 | 18.3 |



|                  |      |
|------------------|------|
| 2020-11-03 08:30 | 18.4 |
| 2020-11-03 08:40 | 18.6 |
| 2020-11-03 08:50 | 20.1 |
| 2020-11-03 09:00 | 20.1 |
| 2020-11-03 09:10 | 20.7 |
| 2020-11-03 09:20 | 21.4 |
| 2020-11-03 09:30 | 22.2 |
| 2020-11-03 09:40 | 21.9 |
| 2020-11-03 09:50 | 22.4 |
| 2020-11-03 10:00 | 23.1 |
| 2020-11-03 10:10 | 22.8 |
| 2020-11-03 10:20 | 23.1 |
| 2020-11-03 10:30 | 23.4 |
| 2020-11-03 10:40 | 24.1 |
| 2020-11-03 10:50 | 24   |
| 2020-11-03 11:00 | 26.4 |
| 2020-11-03 11:10 | 25.5 |
| 2020-11-03 11:20 | 26.4 |
| 2020-11-03 11:30 | 24.2 |
| 2020-11-03 11:40 | 27.8 |
| 2020-11-03 11:50 | 27.2 |
| 2020-11-03 12:00 | 27.4 |
| 2020-11-03 12:10 | 26.3 |
| 2020-11-03 12:20 | 26.1 |
| 2020-11-03 12:30 | 27.9 |
| 2020-11-03 12:40 | 27.4 |
| 2020-11-03 12:50 | 27.3 |
| 2020-11-03 13:00 | 27.4 |
| 2020-11-03 13:10 | 25.3 |
| 2020-11-03 13:20 | 25.8 |
| 2020-11-03 13:30 | 24.4 |
| 2020-11-03 13:40 | 23.9 |
| 2020-11-03 13:50 | 22.5 |
| 2020-11-03 14:00 | 22.8 |
| 2020-11-03 14:10 | 24.8 |
| 2020-11-03 14:20 | 25.3 |
| 2020-11-03 14:30 | 27   |
| 2020-11-03 14:40 | 28.5 |
| 2020-11-03 14:50 | 23.6 |
| 2020-11-03 15:00 | 22   |
| 2020-11-03 15:10 | 26.3 |
| 2020-11-03 15:20 | 26.6 |
| 2020-11-03 15:30 | 27   |
| 2020-11-03 15:40 | 26.1 |
| 2020-11-03 15:50 | 26.9 |
| 2020-11-03 16:00 | 24.6 |
| 2020-11-03 16:10 | 26.1 |
| 2020-11-03 16:20 | 25.3 |
| 2020-11-03 16:30 | 25.8 |
| 2020-11-03 16:40 | 26.6 |



|                  |      |
|------------------|------|
| 2020-11-03 16:50 | 25.9 |
| 2020-11-03 17:00 | 25.8 |
| 2020-11-03 17:10 | 24.5 |
| 2020-11-03 17:20 | 24.6 |
| 2020-11-03 17:30 | 24.4 |
| 2020-11-03 17:40 | 24.9 |
| 2020-11-03 17:50 | 24.3 |
| 2020-11-03 18:00 | 23.9 |
| 2020-11-03 18:10 | 23.1 |
| 2020-11-03 18:20 | 22.3 |
| 2020-11-03 18:30 | 21.4 |
| 2020-11-03 18:40 | 20.9 |
| 2020-11-03 18:50 | 20.5 |
| 2020-11-03 19:00 | 20   |
| 2020-11-03 19:10 | 19.6 |
| 2020-11-03 19:20 | 19.3 |
| 2020-11-03 19:30 | 18.9 |
| 2020-11-03 19:40 | 18.6 |
| 2020-11-03 19:50 | 18.4 |
| 2020-11-03 20:00 | 18.1 |
| 2020-11-03 20:10 | 17.8 |
| 2020-11-03 20:20 | 17.5 |
| 2020-11-03 20:30 | 17.3 |
| 2020-11-03 20:40 | 17.1 |
| 2020-11-03 20:50 | 16.8 |
| 2020-11-03 21:00 | 16.6 |
| 2020-11-03 21:10 | 16.4 |
| 2020-11-03 21:20 | 16.2 |
| 2020-11-03 21:30 | 15.9 |
| 2020-11-03 21:40 | 15.8 |
| 2020-11-03 21:50 | 15.5 |
| 2020-11-03 22:00 | 15.3 |
| 2020-11-03 22:10 | 15.1 |
| 2020-11-03 22:20 | 14.9 |
| 2020-11-03 22:30 | 14.7 |
| 2020-11-03 22:40 | 14.6 |
| 2020-11-03 22:50 | 14.4 |
| 2020-11-03 23:00 | 14.2 |
| 2020-11-03 23:10 | 14.1 |
| 2020-11-03 23:20 | 13.9 |
| 2020-11-03 23:30 | 13.8 |
| 2020-11-03 23:40 | 13.7 |
| 2020-11-03 23:50 | 13.5 |
| 2020-11-04 00:00 | 13.4 |
| 2020-11-04 00:10 | 13.3 |
| 2020-11-04 00:20 | 13.1 |
| 2020-11-04 00:30 | 12.9 |
| 2020-11-04 00:40 | 12.8 |
| 2020-11-04 00:50 | 12.8 |
| 2020-11-04 01:00 | 12.6 |



|                  |      |
|------------------|------|
| 2020-11-04 01:10 | 12.4 |
| 2020-11-04 01:20 | 12.1 |
| 2020-11-04 01:30 | 11.9 |
| 2020-11-04 01:40 | 11.8 |
| 2020-11-04 01:50 | 11.7 |
| 2020-11-04 02:00 | 11.4 |
| 2020-11-04 02:10 | 11.2 |
| 2020-11-04 02:20 | 11   |
| 2020-11-04 02:30 | 10.9 |
| 2020-11-04 02:40 | 10.8 |
| 2020-11-04 02:50 | 10.6 |
| 2020-11-04 03:00 | 10.6 |
| 2020-11-04 03:10 | 10.6 |
| 2020-11-04 03:20 | 10.5 |
| 2020-11-04 03:30 | 10.5 |
| 2020-11-04 03:40 | 10.4 |
| 2020-11-04 03:50 | 10.4 |
| 2020-11-04 04:00 | 10.4 |
| 2020-11-04 04:10 | 10.4 |
| 2020-11-04 04:20 | 10.3 |
| 2020-11-04 04:30 | 10.1 |
| 2020-11-04 04:40 | 9.9  |
| 2020-11-04 04:50 | 9.9  |
| 2020-11-04 05:00 | 9.9  |
| 2020-11-04 05:10 | 9.9  |
| 2020-11-04 05:20 | 9.9  |
| 2020-11-04 05:30 | 9.9  |
| 2020-11-04 05:40 | 9.9  |
| 2020-11-04 05:50 | 9.9  |
| 2020-11-04 06:00 | 9.9  |
| 2020-11-04 06:10 | 10.1 |
| 2020-11-04 06:20 | 10.3 |
| 2020-11-04 06:30 | 10.6 |
| 2020-11-04 06:40 | 11.3 |
| 2020-11-04 06:50 | 12.2 |
| 2020-11-04 07:00 | 12.6 |
| 2020-11-04 07:10 | 13.6 |
| 2020-11-04 07:20 | 13.5 |
| 2020-11-04 07:30 | 14.3 |
| 2020-11-04 07:40 | 14.2 |
| 2020-11-04 07:50 | 15.1 |
| 2020-11-04 08:00 | 14.8 |
| 2020-11-04 08:10 | 15.1 |
| 2020-11-04 08:20 | 15.2 |
| 2020-11-04 08:30 | 15.9 |
| 2020-11-04 08:40 | 16.3 |
| 2020-11-04 08:50 | 16.3 |
| 2020-11-04 09:00 | 16.3 |
| 2020-11-04 09:10 | 16.9 |
| 2020-11-04 09:20 | 17.6 |



|                  |      |
|------------------|------|
| 2020-11-04 09:30 | 17.8 |
| 2020-11-04 09:40 | 18.5 |
| 2020-11-04 09:50 | 18.8 |
| 2020-11-04 10:00 | 19   |
| 2020-11-04 10:10 | 18.7 |
| 2020-11-04 10:20 | 19.2 |
| 2020-11-04 10:30 | 19.4 |
| 2020-11-04 10:40 | 20.4 |
| 2020-11-04 10:50 | 19.3 |
| 2020-11-04 11:00 | 19.5 |
| 2020-11-04 11:10 | 21.3 |
| 2020-11-04 11:20 | 22.3 |
| 2020-11-04 11:30 | 20.6 |
| 2020-11-04 11:40 | 22.4 |
| 2020-11-04 11:50 | 23.1 |
| 2020-11-04 12:00 | 21.1 |
| 2020-11-04 12:10 | 22.7 |
| 2020-11-04 12:20 | 22.1 |
| 2020-11-04 12:30 | 22.1 |
| 2020-11-04 12:40 | 23.4 |
| 2020-11-04 12:50 | 23.8 |
| 2020-11-04 13:00 | 23.2 |
| 2020-11-04 13:10 | 24.3 |
| 2020-11-04 13:20 | 24.9 |
| 2020-11-04 13:30 | 24.7 |
| 2020-11-04 13:40 | 23.1 |
| 2020-11-04 13:50 | 24.6 |
| 2020-11-04 14:00 | 24.7 |
| 2020-11-04 14:10 | 24.4 |
| 2020-11-04 14:20 | 23.6 |
| 2020-11-04 14:30 | 25.4 |
| 2020-11-04 14:40 | 24.8 |
| 2020-11-04 14:50 | 23.8 |
| 2020-11-04 15:00 | 24.5 |
| 2020-11-04 15:10 | 24.7 |
| 2020-11-04 15:20 | 24.8 |
| 2020-11-04 15:30 | 24.2 |
| 2020-11-04 15:40 | 23.7 |
| 2020-11-04 15:50 | 23.9 |
| 2020-11-04 16:00 | 24.3 |
| 2020-11-04 16:10 | 24.3 |
| 2020-11-04 16:20 | 23.9 |
| 2020-11-04 16:30 | 24.1 |
| 2020-11-04 16:40 | 23   |
| 2020-11-04 16:50 | 23.6 |
| 2020-11-04 17:00 | 23.3 |
| 2020-11-04 17:10 | 22.6 |
| 2020-11-04 17:20 | 22.3 |
| 2020-11-04 17:30 | 22.4 |
| 2020-11-04 17:40 | 21.6 |



|                  |      |
|------------------|------|
| 2020-11-04 17:50 | 21.4 |
| 2020-11-04 18:00 | 21.5 |
| 2020-11-04 18:10 | 20.5 |
| 2020-11-04 18:20 | 19.6 |
| 2020-11-04 18:30 | 18.8 |
| 2020-11-04 18:40 | 18.4 |
| 2020-11-04 18:50 | 17.9 |
| 2020-11-04 19:00 | 17.5 |
| 2020-11-04 19:10 | 17   |
| 2020-11-04 19:20 | 16.7 |
| 2020-11-04 19:30 | 16.4 |
| 2020-11-04 19:40 | 16.1 |
| 2020-11-04 19:50 | 15.8 |
| 2020-11-04 20:00 | 15.4 |
| 2020-11-04 20:10 | 15.3 |
| 2020-11-04 20:20 | 14.9 |
| 2020-11-04 20:30 | 14.6 |
| 2020-11-04 20:40 | 14.4 |
| 2020-11-04 20:50 | 14.2 |
| 2020-11-04 21:00 | 14   |
| 2020-11-04 21:10 | 13.8 |
| 2020-11-04 21:20 | 13.6 |
| 2020-11-04 21:30 | 13.4 |
| 2020-11-04 21:40 | 13.3 |
| 2020-11-04 21:50 | 13.1 |
| 2020-11-04 22:00 | 12.9 |
| 2020-11-04 22:10 | 12.7 |
| 2020-11-04 22:20 | 12.6 |
| 2020-11-04 22:30 | 12.4 |
| 2020-11-04 22:40 | 12.2 |
| 2020-11-04 22:50 | 11.9 |
| 2020-11-04 23:00 | 11.8 |
| 2020-11-04 23:10 | 11.5 |
| 2020-11-04 23:20 | 11.4 |
| 2020-11-04 23:30 | 11.1 |
| 2020-11-04 23:40 | 10.9 |
| 2020-11-04 23:50 | 10.8 |
| 2020-11-05 00:00 | 10.6 |
| 2020-11-05 00:10 | 10.4 |
| 2020-11-05 00:20 | 10.3 |
| 2020-11-05 00:30 | 10.2 |
| 2020-11-05 00:40 | 9.9  |
| 2020-11-05 00:50 | 9.7  |
| 2020-11-05 01:00 | 9.6  |
| 2020-11-05 01:10 | 9.6  |
| 2020-11-05 01:20 | 9.5  |
| 2020-11-05 01:30 | 9.4  |
| 2020-11-05 01:40 | 9.2  |
| 2020-11-05 01:50 | 9.1  |
| 2020-11-05 02:00 | 9    |



|                  |      |
|------------------|------|
| 2020-11-05 02:10 | 9    |
| 2020-11-05 02:20 | 8.8  |
| 2020-11-05 02:30 | 8.7  |
| 2020-11-05 02:40 | 8.6  |
| 2020-11-05 02:50 | 8.3  |
| 2020-11-05 03:00 | 8.2  |
| 2020-11-05 03:10 | 7.9  |
| 2020-11-05 03:20 | 7.8  |
| 2020-11-05 03:30 | 7.8  |
| 2020-11-05 03:40 | 7.7  |
| 2020-11-05 03:50 | 7.6  |
| 2020-11-05 04:00 | 7.4  |
| 2020-11-05 04:10 | 7.3  |
| 2020-11-05 04:20 | 7.3  |
| 2020-11-05 04:30 | 7.2  |
| 2020-11-05 04:40 | 7.1  |
| 2020-11-05 04:50 | 6.9  |
| 2020-11-05 05:00 | 6.8  |
| 2020-11-05 05:10 | 6.7  |
| 2020-11-05 05:20 | 6.6  |
| 2020-11-05 05:30 | 6.4  |
| 2020-11-05 05:40 | 6.4  |
| 2020-11-05 05:50 | 6.6  |
| 2020-11-05 06:00 | 6.8  |
| 2020-11-05 06:10 | 7.8  |
| 2020-11-05 06:20 | 8.5  |
| 2020-11-05 06:30 | 9.1  |
| 2020-11-05 06:40 | 9.6  |
| 2020-11-05 06:50 | 9.9  |
| 2020-11-05 07:00 | 10.4 |
| 2020-11-05 07:10 | 10.7 |
| 2020-11-05 07:20 | 10.9 |
| 2020-11-05 07:30 | 11.2 |
| 2020-11-05 07:40 | 11.1 |
| 2020-11-05 07:50 | 12   |
| 2020-11-05 08:00 | 12.8 |
| 2020-11-05 08:10 | 12.9 |
| 2020-11-05 08:20 | 13.4 |
| 2020-11-05 08:30 | 13.9 |
| 2020-11-05 08:40 | 13.9 |
| 2020-11-05 08:50 | 14.4 |
| 2020-11-05 09:00 | 15.3 |
| 2020-11-05 09:10 | 15.8 |
| 2020-11-05 09:20 | 16.6 |
| 2020-11-05 09:30 | 16.4 |
| 2020-11-05 11:30 | 21.8 |
| 2020-11-05 11:40 | 21.6 |
| 2020-11-05 11:50 | 22.4 |
| 2020-11-05 12:00 | 22.6 |
| 2020-11-05 12:10 | 22.8 |



|                  |      |
|------------------|------|
| 2020-11-05 12:20 | 23.2 |
| 2020-11-05 12:30 | 24.3 |
| 2020-11-05 12:40 | 24.6 |
| 2020-11-05 12:50 | 23.6 |
| 2020-11-05 13:00 | 24.6 |
| 2020-11-05 13:10 | 25.6 |
| 2020-11-05 13:20 | 25.8 |
| 2020-11-05 13:30 | 26.4 |
| 2020-11-05 13:40 | 26.7 |
| 2020-11-05 13:50 | 27.4 |
| 2020-11-05 14:00 | 25.3 |
| 2020-11-05 14:10 | 26.4 |
| 2020-11-05 14:20 | 25.9 |
| 2020-11-05 14:30 | 25.9 |
| 2020-11-05 14:40 | 26.1 |
| 2020-11-05 14:50 | 26.1 |
| 2020-11-05 15:00 | 26.3 |
| 2020-11-05 15:10 | 25.2 |
| 2020-11-05 15:20 | 25.3 |
| 2020-11-05 15:30 | 25.4 |
| 2020-11-05 15:40 | 26.3 |
| 2020-11-05 15:50 | 27.5 |
| 2020-11-05 16:00 | 25.8 |
| 2020-11-05 16:10 | 26.3 |
| 2020-11-05 16:20 | 24.6 |
| 2020-11-05 16:30 | 25.4 |
| 2020-11-05 16:40 | 24.4 |
| 2020-11-05 16:50 | 24.8 |
| 2020-11-05 17:00 | 24.4 |
| 2020-11-05 17:10 | 23.9 |
| 2020-11-05 17:20 | 23.9 |
| 2020-11-05 17:30 | 23.4 |
| 2020-11-05 17:40 | 23.4 |
| 2020-11-05 17:50 | 22.6 |
| 2020-11-05 18:00 | 22.3 |
| 2020-11-05 18:10 | 21.6 |
| 2020-11-05 18:20 | 21.1 |
| 2020-11-05 18:30 | 20.6 |
| 2020-11-05 18:40 | 19.9 |
| 2020-11-05 18:50 | 19.4 |
| 2020-11-05 19:00 | 18.9 |
| 2020-11-05 19:10 | 18.7 |
| 2020-11-05 19:20 | 18.4 |
| 2020-11-05 19:30 | 18   |
| 2020-11-05 19:40 | 17.7 |
| 2020-11-05 19:50 | 17.4 |
| 2020-11-05 20:00 | 17.1 |
| 2020-11-05 20:10 | 16.8 |
| 2020-11-05 20:20 | 16.6 |
| 2020-11-05 20:30 | 16.3 |



|                  |      |
|------------------|------|
| 2020-11-05 20:40 | 16.1 |
| 2020-11-05 20:50 | 15.9 |
| 2020-11-05 21:00 | 15.7 |
| 2020-11-05 21:10 | 15.4 |
| 2020-11-05 21:20 | 15.3 |
| 2020-11-05 21:30 | 15.1 |
| 2020-11-05 21:40 | 14.9 |
| 2020-11-05 21:50 | 14.8 |
| 2020-11-05 22:00 | 14.7 |
| 2020-11-05 22:10 | 14.6 |
| 2020-11-05 22:20 | 14.4 |
| 2020-11-05 22:30 | 14.3 |
| 2020-11-05 22:40 | 14.1 |
| 2020-11-05 22:50 | 13.9 |
| 2020-11-05 23:00 | 13.6 |
| 2020-11-05 23:10 | 13.5 |
| 2020-11-05 23:20 | 13.4 |
| 2020-11-05 23:30 | 13.3 |
| 2020-11-05 23:40 | 13.1 |
| 2020-11-06 04:00 | 8.9  |
| 2020-11-06 04:20 | 8.8  |
| 2020-11-06 04:30 | 8.8  |
| 2020-11-06 04:40 | 8.7  |
| 2020-11-06 04:50 | 8.4  |
| 2020-11-06 05:00 | 8.6  |
| 2020-11-06 05:10 | 8.6  |
| 2020-11-06 05:20 | 8.3  |
| 2020-11-06 05:30 | 8.3  |
| 2020-11-06 05:40 | 8.2  |
| 2020-11-06 05:50 | 8.2  |
| 2020-11-06 06:00 | 8.7  |
| 2020-11-06 06:10 | 9.9  |
| 2020-11-06 06:20 | 10.9 |
| 2020-11-06 06:30 | 11.7 |
| 2020-11-06 06:40 | 11.8 |
| 2020-11-06 06:50 | 12.2 |
| 2020-11-06 07:00 | 12.3 |
| 2020-11-06 07:10 | 12.9 |
| 2020-11-06 07:20 | 13.1 |
| 2020-11-06 07:30 | 13.6 |
| 2020-11-06 07:40 | 13.8 |
| 2020-11-06 07:50 | 14.4 |
| 2020-11-06 08:00 | 15.4 |
| 2020-11-06 08:10 | 15.6 |
| 2020-11-06 08:20 | 16.3 |
| 2020-11-06 08:30 | 16.4 |
| 2020-11-06 08:40 | 17.3 |
| 2020-11-06 08:50 | 18   |
| 2020-11-06 09:00 | 19.4 |
| 2020-11-06 09:10 | 19.9 |



|                  |      |
|------------------|------|
| 2020-11-06 09:20 | 20.4 |
| 2020-11-06 09:30 | 20.4 |
| 2020-11-06 09:40 | 20.7 |
| 2020-11-06 09:50 | 21.6 |
| 2020-11-06 10:00 | 21.6 |
| 2020-11-06 10:10 | 21.9 |
| 2020-11-06 10:20 | 22.6 |
| 2020-11-06 10:30 | 23.4 |
| 2020-11-06 10:50 | 23.6 |
| 2020-11-06 11:00 | 24.2 |
| 2020-11-06 11:10 | 25.4 |
| 2020-11-06 11:20 | 24.9 |
| 2020-11-06 11:30 | 26   |
| 2020-11-06 11:40 | 26.4 |
| 2020-11-06 11:50 | 26.1 |
| 2020-11-06 12:00 | 25.7 |
| 2020-11-06 12:10 | 27.1 |
| 2020-11-06 12:20 | 27   |
| 2020-11-06 12:30 | 27.4 |
| 2020-11-06 12:40 | 28.3 |
| 2020-11-06 12:50 | 27.9 |
| 2020-11-06 13:00 | 28.8 |
| 2020-11-06 13:10 | 29.3 |
| 2020-11-06 13:20 | 29.3 |
| 2020-11-06 13:30 | 29.3 |
| 2020-11-06 13:40 | 29.9 |
| 2020-11-06 13:50 | 29.3 |
| 2020-11-06 14:00 | 29.9 |
| 2020-11-06 14:10 | 30.4 |
| 2020-11-06 14:20 | 29.4 |
| 2020-11-06 14:30 | 29.8 |
| 2020-11-06 14:40 | 29.9 |
| 2020-11-06 14:50 | 30.1 |
| 2020-11-06 15:00 | 30.9 |
| 2020-11-06 15:10 | 30.1 |
| 2020-11-06 15:20 | 30.5 |
| 2020-11-06 15:30 | 30.8 |
| 2020-11-06 15:40 | 30.5 |
| 2020-11-06 15:50 | 31.1 |
| 2020-11-06 16:00 | 30.9 |
| 2020-11-06 16:10 | 30.2 |
| 2020-11-06 16:20 | 30.7 |
| 2020-11-06 16:30 | 31.9 |
| 2020-11-06 16:40 | 31.2 |
| 2020-11-06 16:50 | 30.6 |
| 2020-11-06 17:00 | 30.6 |
| 2020-11-06 17:10 | 30.9 |
| 2020-11-06 17:20 | 30.3 |
| 2020-11-06 17:30 | 29.1 |
| 2020-11-06 17:40 | 29.4 |



|                  |      |
|------------------|------|
| 2020-11-06 17:50 | 28.4 |
| 2020-11-06 18:00 | 28.2 |
| 2020-11-06 18:10 | 27.8 |
| 2020-11-06 18:20 | 26.9 |
| 2020-11-06 18:30 | 25.8 |
| 2020-11-06 18:40 | 25.3 |
| 2020-11-06 18:50 | 24.6 |
| 2020-11-06 20:00 | 22.1 |
| 2020-11-06 20:10 | 21.9 |
| 2020-11-06 20:20 | 21.7 |
| 2020-11-06 20:30 | 21.4 |
| 2020-11-06 20:40 | 21.2 |
| 2020-11-06 20:50 | 21.4 |
| 2020-11-06 21:00 | 20.9 |
| 2020-11-06 21:10 | 20.7 |
| 2020-11-06 21:20 | 20.7 |
| 2020-11-06 21:30 | 20.4 |
| 2020-11-06 21:40 | 20.1 |
| 2020-11-06 21:50 | 20.1 |
| 2020-11-06 22:00 | 19.9 |
| 2020-11-06 22:10 | 19.7 |
| 2020-11-06 22:20 | 19.6 |
| 2020-11-06 22:30 | 19.4 |
| 2020-11-06 22:40 | 19.3 |
| 2020-11-06 22:50 | 19.3 |
| 2020-11-06 23:00 | 19.2 |
| 2020-11-06 23:10 | 19   |
| 2020-11-06 23:20 | 18.7 |
| 2020-11-06 23:30 | 18.6 |
| 2020-11-06 23:40 | 18.1 |
| 2020-11-06 23:50 | 18   |
| 2020-11-07 00:00 | 17.9 |
| 2020-11-07 00:10 | 17.9 |
| 2020-11-07 00:20 | 17.8 |
| 2020-11-07 00:30 | 17.6 |
| 2020-11-07 00:40 | 17.4 |
| 2020-11-07 00:50 | 17.2 |
| 2020-11-07 01:00 | 16.9 |
| 2020-11-07 01:10 | 16.5 |
| 2020-11-07 01:20 | 16.3 |
| 2020-11-07 01:30 | 16.1 |
| 2020-11-07 01:40 | 15.8 |
| 2020-11-07 01:50 | 15.7 |
| 2020-11-07 02:00 | 15.6 |
| 2020-11-07 02:10 | 15.4 |
| 2020-11-07 02:20 | 15.3 |
| 2020-11-07 02:30 | 15.3 |
| 2020-11-07 02:40 | 15.1 |
| 2020-11-07 02:50 | 14.9 |
| 2020-11-07 03:00 | 14.8 |



|                  |      |
|------------------|------|
| 2020-11-07 03:10 | 14.6 |
| 2020-11-07 03:20 | 14.4 |
| 2020-11-07 03:30 | 14.3 |
| 2020-11-07 03:40 | 14.1 |
| 2020-11-07 03:50 | 14   |
| 2020-11-07 04:00 | 13.9 |
| 2020-11-07 04:10 | 13.9 |
| 2020-11-07 04:20 | 13.8 |
| 2020-11-07 04:30 | 13.8 |
| 2020-11-07 04:40 | 13.6 |
| 2020-11-07 04:50 | 13.6 |
| 2020-11-07 05:00 | 13.6 |
| 2020-11-07 05:10 | 13.4 |
| 2020-11-07 05:20 | 13.3 |
| 2020-11-07 05:30 | 13.3 |
| 2020-11-07 05:40 | 13.2 |
| 2020-11-07 05:50 | 13.3 |
| 2020-11-07 06:00 | 13.6 |
| 2020-11-07 06:10 | 14.4 |
| 2020-11-07 06:20 | 15.1 |
| 2020-11-07 06:30 | 15.8 |
| 2020-11-07 06:40 | 16.1 |
| 2020-11-07 06:50 | 16   |
| 2020-11-07 07:00 | 16.4 |
| 2020-11-07 07:10 | 16.6 |
| 2020-11-07 07:20 | 16.9 |
| 2020-11-07 07:30 | 17.5 |
| 2020-11-07 07:40 | 17.7 |
| 2020-11-07 07:50 | 18.4 |
| 2020-11-07 08:00 | 18.8 |
| 2020-11-07 08:10 | 19.3 |
| 2020-11-07 08:20 | 20.1 |
| 2020-11-07 08:30 | 19.8 |
| 2020-11-07 08:40 | 20.6 |
| 2020-11-07 08:50 | 20.9 |
| 2020-11-07 09:00 | 21.4 |
| 2020-11-07 09:10 | 22.3 |
| 2020-11-07 09:20 | 22.8 |
| 2020-11-07 09:30 | 23.5 |
| 2020-11-07 09:40 | 24.1 |
| 2020-11-07 09:50 | 23.8 |
| 2020-11-07 10:00 | 25.4 |
| 2020-11-07 10:10 | 25.4 |
| 2020-11-07 10:20 | 26.1 |
| 2020-11-07 10:30 | 25.8 |
| 2020-11-07 10:40 | 26.9 |
| 2020-11-07 10:50 | 26.6 |
| 2020-11-07 11:00 | 27   |
| 2020-11-07 11:10 | 27.9 |
| 2020-11-07 11:20 | 28.3 |



|                  |      |
|------------------|------|
| 2020-11-07 11:30 | 29.6 |
| 2020-11-07 11:40 | 28.6 |
| 2020-11-07 11:50 | 29.9 |
| 2020-11-07 12:00 | 30.4 |
| 2020-11-07 12:10 | 30.9 |
| 2020-11-07 12:20 | 30.8 |
| 2020-11-07 12:30 | 30.6 |
| 2020-11-07 12:40 | 31.6 |
| 2020-11-07 12:50 | 31.8 |
| 2020-11-07 13:00 | 31.4 |
| 2020-11-07 13:10 | 31.8 |
| 2020-11-07 13:20 | 32.4 |
| 2020-11-07 13:30 | 32.1 |
| 2020-11-07 13:40 | 34.6 |
| 2020-11-07 13:50 | 33.6 |
| 2020-11-07 14:00 | 32.9 |
| 2020-11-07 14:10 | 33.8 |
| 2020-11-07 14:20 | 34   |
| 2020-11-07 14:30 | 33.2 |
| 2020-11-07 14:40 | 33.4 |
| 2020-11-07 14:50 | 33.8 |
| 2020-11-07 15:00 | 33.1 |
| 2020-11-07 15:10 | 33   |
| 2020-11-07 15:20 | 33.7 |
| 2020-11-07 15:30 | 32.2 |
| 2020-11-07 15:40 | 34.2 |
| 2020-11-07 15:50 | 35   |
| 2020-11-07 16:00 | 33.6 |
| 2020-11-07 16:10 | 34.7 |
| 2020-11-07 16:20 | 33.3 |
| 2020-11-07 16:30 | 32.9 |
| 2020-11-07 16:40 | 33.4 |
| 2020-11-07 16:50 | 32.7 |
| 2020-11-07 17:00 | 32.9 |
| 2020-11-07 17:10 | 33.1 |
| 2020-11-07 17:20 | 32.1 |
| 2020-11-07 17:30 | 32.1 |
| 2020-11-07 17:40 | 31.9 |
| 2020-11-07 17:50 | 31.8 |
| 2020-11-07 18:00 | 31.7 |
| 2020-11-07 18:10 | 30.6 |
| 2020-11-07 18:20 | 30.2 |
| 2020-11-07 18:30 | 28.9 |
| 2020-11-07 18:40 | 28.1 |
| 2020-11-07 18:50 | 27.3 |
| 2020-11-07 19:00 | 26.4 |
| 2020-11-07 19:10 | 25.9 |
| 2020-11-07 19:20 | 25.4 |
| 2020-11-07 19:30 | 25   |
| 2020-11-07 19:40 | 24.8 |



|                  |      |
|------------------|------|
| 2020-11-07 19:50 | 25.2 |
| 2020-11-07 20:00 | 25.3 |
| 2020-11-07 20:10 | 24.8 |
| 2020-11-07 20:20 | 24.5 |
| 2020-11-07 20:30 | 24   |
| 2020-11-07 20:40 | 24.1 |
| 2020-11-07 20:50 | 23.9 |
| 2020-11-07 21:00 | 23.9 |
| 2020-11-07 21:10 | 23.6 |
| 2020-11-07 21:20 | 23.8 |
| 2020-11-07 21:30 | 24.8 |
| 2020-11-07 21:40 | 24.7 |
| 2020-11-07 21:50 | 24.1 |
| 2020-11-07 22:00 | 23.3 |
| 2020-11-07 22:10 | 22.6 |
| 2020-11-07 22:20 | 21.9 |
| 2020-11-07 22:30 | 21.8 |
| 2020-11-07 22:40 | 22.4 |
| 2020-11-07 22:50 | 22.3 |
| 2020-11-07 23:00 | 21.9 |
| 2020-11-07 23:10 | 21.7 |
| 2020-11-07 23:20 | 21.7 |
| 2020-11-07 23:30 | 21.4 |
| 2020-11-07 23:40 | 21.3 |
| 2020-11-07 23:50 | 21.1 |
| 2020-11-08 00:00 | 20.9 |
| 2020-11-08 00:10 | 20.7 |
| 2020-11-08 00:20 | 20.4 |
| 2020-11-08 00:30 | 20.3 |
| 2020-11-08 00:40 | 20.3 |
| 2020-11-08 00:50 | 20.1 |
| 2020-11-08 01:00 | 19.8 |
| 2020-11-08 01:10 | 19.8 |
| 2020-11-08 01:20 | 19.6 |
| 2020-11-08 01:30 | 19.5 |
| 2020-11-08 01:40 | 19.4 |
| 2020-11-08 01:50 | 19.1 |
| 2020-11-08 02:00 | 18.9 |
| 2020-11-08 02:10 | 18.8 |
| 2020-11-08 02:20 | 18.5 |
| 2020-11-08 02:30 | 18.4 |
| 2020-11-08 02:40 | 18.1 |
| 2020-11-08 02:50 | 17.9 |
| 2020-11-08 03:00 | 17.9 |
| 2020-11-08 03:10 | 17.8 |
| 2020-11-08 03:20 | 17.6 |
| 2020-11-08 03:30 | 17.4 |
| 2020-11-08 03:40 | 17.3 |
| 2020-11-08 03:50 | 17.1 |
| 2020-11-08 04:00 | 16.9 |



|                  |      |
|------------------|------|
| 2020-11-08 04:10 | 16.9 |
| 2020-11-08 04:20 | 16.9 |
| 2020-11-08 04:30 | 16.9 |
| 2020-11-08 04:40 | 16.8 |
| 2020-11-08 04:50 | 16.8 |
| 2020-11-08 05:00 | 16.6 |
| 2020-11-08 05:10 | 16.5 |
| 2020-11-08 05:20 | 16.4 |
| 2020-11-08 05:30 | 16.4 |
| 2020-11-08 05:40 | 16.3 |
| 2020-11-08 05:50 | 16.3 |
| 2020-11-08 06:00 | 16.6 |
| 2020-11-08 06:10 | 17   |
| 2020-11-08 06:20 | 17.5 |
| 2020-11-08 06:30 | 18   |
| 2020-11-08 06:40 | 18.6 |
| 2020-11-08 06:50 | 18.8 |
| 2020-11-08 07:00 | 19.6 |
| 2020-11-08 07:10 | 20   |
| 2020-11-08 07:20 | 20.4 |
| 2020-11-08 07:30 | 20.3 |
| 2020-11-08 07:40 | 20.8 |
| 2020-11-08 07:50 | 20.9 |
| 2020-11-08 08:00 | 21.3 |
| 2020-11-08 08:10 | 21.8 |
| 2020-11-08 08:20 | 22.9 |
| 2020-11-08 08:30 | 23.5 |
| 2020-11-08 08:40 | 24.4 |
| 2020-11-08 08:50 | 24.8 |
| 2020-11-08 09:00 | 25.3 |
| 2020-11-08 09:10 | 25.9 |
| 2020-11-08 09:20 | 26.8 |
| 2020-11-08 09:30 | 26.4 |
| 2020-11-08 09:40 | 27.1 |
| 2020-11-08 09:50 | 28.3 |
| 2020-11-08 10:00 | 28.9 |
| 2020-11-08 10:10 | 30.4 |
| 2020-11-08 10:20 | 30.1 |
| 2020-11-08 10:30 | 32   |
| 2020-11-08 10:40 | 31.8 |
| 2020-11-08 10:50 | 31.4 |
| 2020-11-08 11:00 | 32.1 |
| 2020-11-08 11:10 | 33.1 |
| 2020-11-08 11:20 | 32.4 |
| 2020-11-08 11:30 | 32.4 |
| 2020-11-08 11:40 | 34.3 |
| 2020-11-08 11:50 | 33.8 |
| 2020-11-08 12:00 | 34.5 |
| 2020-11-08 12:10 | 34.3 |
| 2020-11-08 12:20 | 34.2 |



|                  |      |
|------------------|------|
| 2020-11-08 12:30 | 34.4 |
| 2020-11-08 12:40 | 34.9 |
| 2020-11-08 12:50 | 33.7 |
| 2020-11-08 13:00 | 33.9 |
| 2020-11-08 13:10 | 33.7 |
| 2020-11-08 13:20 | 35.4 |
| 2020-11-08 13:30 | 34.2 |
| 2020-11-08 13:40 | 35.1 |
| 2020-11-08 13:50 | 33.8 |
| 2020-11-08 14:00 | 32.6 |
| 2020-11-08 14:10 | 32.9 |
| 2020-11-08 14:20 | 33   |
| 2020-11-08 14:30 | 33.5 |
| 2020-11-08 14:40 | 33   |
| 2020-11-08 14:50 | 33.3 |
| 2020-11-08 15:00 | 32.9 |
| 2020-11-08 15:10 | 32.7 |
| 2020-11-08 15:20 | 32.8 |
| 2020-11-08 15:30 | 33.5 |
| 2020-11-08 15:40 | 32.7 |
| 2020-11-08 15:50 | 32.7 |
| 2020-11-08 16:00 | 32.5 |
| 2020-11-08 16:10 | 32.5 |
| 2020-11-08 16:20 | 32.4 |
| 2020-11-08 16:30 | 32.9 |
| 2020-11-08 16:40 | 31.7 |
| 2020-11-08 16:50 | 31.8 |
| 2020-11-08 17:00 | 32.4 |
| 2020-11-08 17:10 | 32.2 |
| 2020-11-08 17:20 | 31.6 |
| 2020-11-08 17:30 | 31.2 |
| 2020-11-08 17:40 | 30.8 |
| 2020-11-08 17:50 | 30.2 |
| 2020-11-08 18:00 | 29.8 |
| 2020-11-08 18:10 | 29.6 |
| 2020-11-08 18:20 | 29.3 |
| 2020-11-08 18:30 | 28.9 |
| 2020-11-08 18:40 | 28.6 |
| 2020-11-08 18:50 | 28.3 |
| 2020-11-08 19:00 | 28   |
| 2020-11-08 19:10 | 27.6 |
| 2020-11-08 19:20 | 27.5 |
| 2020-11-08 19:30 | 27.3 |
| 2020-11-08 19:50 | 27.3 |
| 2020-11-08 20:00 | 27   |
| 2020-11-08 20:10 | 26.8 |
| 2020-11-08 20:20 | 25.9 |
| 2020-11-08 20:30 | 25.4 |
| 2020-11-08 20:40 | 25   |
| 2020-11-08 20:50 | 24.6 |



|                  |      |
|------------------|------|
| 2020-11-08 21:00 | 24.1 |
| 2020-11-08 21:10 | 23.7 |
| 2020-11-08 21:20 | 23.1 |
| 2020-11-08 21:30 | 22.6 |
| 2020-11-08 21:40 | 22.4 |
| 2020-11-08 21:50 | 22.1 |
| 2020-11-08 22:00 | 21.9 |
| 2020-11-08 22:10 | 21.8 |
| 2020-11-08 22:20 | 21.7 |
| 2020-11-08 22:30 | 21.5 |
| 2020-11-08 22:40 | 21.4 |
| 2020-11-08 22:50 | 21.3 |
| 2020-11-08 23:00 | 21.1 |
| 2020-11-08 23:10 | 21   |
| 2020-11-08 23:20 | 20.9 |
| 2020-11-08 23:30 | 20.8 |
| 2020-11-08 23:40 | 20.6 |
| 2020-11-08 23:50 | 20.4 |
| 2020-11-09 00:00 | 20.4 |
| 2020-11-09 00:10 | 20.3 |
| 2020-11-09 00:20 | 20.2 |
| 2020-11-09 00:30 | 20   |
| 2020-11-09 00:40 | 19.9 |
| 2020-11-09 00:50 | 19.8 |
| 2020-11-09 01:00 | 19.7 |
| 2020-11-09 01:10 | 19.6 |
| 2020-11-09 01:20 | 19.4 |
| 2020-11-09 01:30 | 19.2 |
| 2020-11-09 01:40 | 19.1 |
| 2020-11-09 01:50 | 19   |
| 2020-11-09 02:00 | 18.8 |
| 2020-11-09 02:10 | 18.8 |
| 2020-11-09 02:20 | 18.6 |
| 2020-11-09 02:30 | 18.5 |
| 2020-11-09 02:40 | 18.4 |
| 2020-11-09 02:50 | 18.3 |
| 2020-11-09 03:00 | 18.3 |
| 2020-11-09 03:10 | 18.4 |
| 2020-11-09 03:20 | 18.4 |
| 2020-11-09 03:30 | 18.4 |
| 2020-11-09 03:40 | 18.3 |
| 2020-11-09 03:50 | 17.9 |
| 2020-11-09 04:00 | 17.7 |
| 2020-11-09 04:10 | 17.8 |
| 2020-11-09 04:20 | 17.6 |
| 2020-11-09 04:30 | 17.4 |
| 2020-11-09 04:40 | 17.4 |
| 2020-11-09 04:50 | 17.3 |
| 2020-11-09 05:00 | 17.3 |
| 2020-11-09 05:10 | 17.3 |



|                  |      |
|------------------|------|
| 2020-11-09 05:20 | 17.1 |
| 2020-11-09 05:30 | 17   |
| 2020-11-09 05:40 | 16.9 |
| 2020-11-09 05:50 | 17   |
| 2020-11-09 06:00 | 17   |
| 2020-11-09 06:10 | 17   |
| 2020-11-09 06:20 | 17   |
| 2020-11-09 06:30 | 17.1 |
| 2020-11-09 06:40 | 17.1 |
| 2020-11-09 06:50 | 17.3 |
| 2020-11-09 07:00 | 17.4 |
| 2020-11-09 07:10 | 17.4 |
| 2020-11-09 07:20 | 17.6 |
| 2020-11-09 07:30 | 17.5 |
| 2020-11-09 07:40 | 17.4 |
| 2020-11-09 07:50 | 17.4 |
| 2020-11-09 08:00 | 17.5 |
| 2020-11-09 08:10 | 17.5 |
| 2020-11-09 08:20 | 17.6 |
| 2020-11-09 08:30 | 17.8 |
| 2020-11-09 08:40 | 18   |
| 2020-11-09 08:50 | 18.2 |
| 2020-11-09 09:00 | 18.6 |
| 2020-11-09 09:10 | 18.9 |
| 2020-11-09 09:20 | 19.3 |
| 2020-11-09 09:30 | 19.2 |
| 2020-11-09 09:40 | 19.1 |
| 2020-11-09 09:50 | 19.2 |
| 2020-11-09 10:00 | 19.1 |
| 2020-11-09 10:10 | 18.8 |
| 2020-11-09 10:20 | 18.8 |
| 2020-11-09 10:30 | 18.3 |
| 2020-11-09 10:40 | 18.1 |
| 2020-11-09 10:50 | 17.9 |
| 2020-11-09 11:00 | 17.9 |
| 2020-11-09 11:10 | 17.7 |
| 2020-11-09 11:20 | 17.5 |
| 2020-11-09 11:30 | 17.6 |
| 2020-11-09 11:40 | 17.8 |
| 2020-11-09 11:50 | 17.8 |
| 2020-11-09 12:00 | 18   |
| 2020-11-09 12:10 | 17.8 |
| 2020-11-09 12:20 | 17.8 |
| 2020-11-09 12:30 | 18.1 |
| 2020-11-09 12:40 | 17.8 |
| 2020-11-09 12:50 | 17.8 |
| 2020-11-09 13:00 | 18.2 |
| 2020-11-09 13:10 | 18.1 |
| 2020-11-09 13:20 | 17.9 |
| 2020-11-09 13:30 | 18.1 |



|                  |      |
|------------------|------|
| 2020-11-09 13:40 | 18.2 |
| 2020-11-09 13:50 | 18.4 |
| 2020-11-09 14:00 | 18.4 |
| 2020-11-09 14:10 | 18.3 |
| 2020-11-09 14:20 | 18.5 |
| 2020-11-09 14:30 | 18.6 |
| 2020-11-09 14:40 | 18.6 |
| 2020-11-09 14:50 | 18.6 |
| 2020-11-09 15:00 | 18.7 |
| 2020-11-09 15:10 | 18.8 |
| 2020-11-09 15:20 | 18.6 |
| 2020-11-09 15:30 | 18.7 |
| 2020-11-09 15:40 | 18.8 |
| 2020-11-09 15:50 | 18.7 |
| 2020-11-09 16:00 | 19.1 |
| 2020-11-09 16:10 | 19.4 |
| 2020-11-09 16:20 | 19.6 |
| 2020-11-09 16:30 | 19.8 |
| 2020-11-09 16:40 | 19.9 |
| 2020-11-09 16:50 | 19.8 |
| 2020-11-09 17:00 | 19.6 |
| 2020-11-09 17:10 | 19.6 |
| 2020-11-09 17:20 | 19.8 |
| 2020-11-09 17:30 | 19.5 |
| 2020-11-09 17:40 | 19.1 |
| 2020-11-09 17:50 | 19.1 |
| 2020-11-09 18:00 | 18.8 |
| 2020-11-09 18:10 | 18.7 |
| 2020-11-09 18:20 | 18.5 |
| 2020-11-09 18:30 | 18.4 |
| 2020-11-09 18:40 | 18.3 |
| 2020-11-09 18:50 | 18.3 |
| 2020-11-09 19:00 | 18.2 |
| 2020-11-09 19:10 | 18.1 |
| 2020-11-09 19:20 | 18   |
| 2020-11-09 19:30 | 17.9 |
| 2020-11-09 19:40 | 17.7 |
| 2020-11-09 19:50 | 17.6 |
| 2020-11-09 20:00 | 17.6 |
| 2020-11-09 20:10 | 17.6 |
| 2020-11-09 20:20 | 17.4 |
| 2020-11-09 20:30 | 17.4 |
| 2020-11-09 20:40 | 17.4 |
| 2020-11-09 20:50 | 17.4 |
| 2020-11-09 21:00 | 17.3 |
| 2020-11-09 21:10 | 17.2 |
| 2020-11-09 21:20 | 17.2 |
| 2020-11-09 21:30 | 17.2 |
| 2020-11-09 21:40 | 17.2 |
| 2020-11-09 21:50 | 17.2 |



|                  |      |
|------------------|------|
| 2020-11-09 22:00 | 17.3 |
| 2020-11-09 22:10 | 17.1 |
| 2020-11-09 22:20 | 16.9 |
| 2020-11-09 22:30 | 16.8 |
| 2020-11-09 22:40 | 16.8 |
| 2020-11-09 22:50 | 16.7 |
| 2020-11-09 23:00 | 16.8 |
| 2020-11-09 23:10 | 16.8 |
| 2020-11-09 23:20 | 16.8 |
| 2020-11-09 23:30 | 16.7 |
| 2020-11-09 23:40 | 16.7 |
| 2020-11-09 23:50 | 16.6 |
| 2020-11-10 00:00 | 16.4 |
| 2020-11-10 00:10 | 16.4 |
| 2020-11-10 00:20 | 16.4 |
| 2020-11-10 00:30 | 16.3 |
| 2020-11-10 00:40 | 16.3 |
| 2020-11-10 00:50 | 16.4 |
| 2020-11-10 01:00 | 16.6 |
| 2020-11-10 01:10 | 16.5 |
| 2020-11-10 01:20 | 16.4 |
| 2020-11-10 01:30 | 16.4 |
| 2020-11-10 01:40 | 16.4 |
| 2020-11-10 01:50 | 16.3 |
| 2020-11-10 02:00 | 16.3 |
| 2020-11-10 02:10 | 16.3 |
| 2020-11-10 02:20 | 16.3 |
| 2020-11-10 02:30 | 16.3 |
| 2020-11-10 02:40 | 16.4 |
| 2020-11-10 02:50 | 16.3 |
| 2020-11-10 03:00 | 16.3 |
| 2020-11-10 03:10 | 16.4 |
| 2020-11-10 03:20 | 16.4 |
| 2020-11-10 03:30 | 16.4 |
| 2020-11-10 03:40 | 16.3 |
| 2020-11-10 03:50 | 16.3 |
| 2020-11-10 04:00 | 16.2 |
| 2020-11-10 04:10 | 16.2 |
| 2020-11-10 04:20 | 16.2 |
| 2020-11-10 04:30 | 16.1 |
| 2020-11-10 04:40 | 16.1 |
| 2020-11-10 04:50 | 16   |
| 2020-11-10 05:00 | 16.1 |
| 2020-11-10 05:10 | 16   |
| 2020-11-10 05:20 | 16.1 |
| 2020-11-10 05:30 | 16.1 |
| 2020-11-10 05:40 | 15.9 |
| 2020-11-10 05:50 | 16   |
| 2020-11-10 06:00 | 16.1 |
| 2020-11-10 06:10 | 16.2 |



|                  |      |
|------------------|------|
| 2020-11-10 06:20 | 16.3 |
| 2020-11-10 06:30 | 16.4 |
| 2020-11-10 06:40 | 16.4 |
| 2020-11-10 06:50 | 16.8 |
| 2020-11-10 07:00 | 16.8 |
| 2020-11-10 07:10 | 17.3 |
| 2020-11-10 07:20 | 18   |
| 2020-11-10 07:30 | 17.9 |
| 2020-11-10 07:40 | 18.8 |
| 2020-11-10 07:50 | 19.3 |
| 2020-11-10 08:00 | 20.3 |
| 2020-11-10 08:10 | 19.9 |
| 2020-11-10 08:20 | 20.4 |
| 2020-11-10 08:30 | 21.9 |
| 2020-11-10 08:40 | 22.3 |
| 2020-11-10 08:50 | 22.9 |
| 2020-11-10 09:00 | 23.9 |
| 2020-11-10 09:10 | 24.5 |
| 2020-11-10 09:20 | 24.2 |
| 2020-11-10 09:30 | 24.1 |
| 2020-11-10 09:40 | 24.1 |
| 2020-11-10 09:50 | 24.6 |
| 2020-11-10 10:00 | 25.3 |
| 2020-11-10 10:10 | 26.1 |
| 2020-11-10 10:20 | 24.1 |
| 2020-11-10 10:30 | 23.1 |
| 2020-11-10 10:40 | 25.4 |
| 2020-11-10 10:50 | 26.1 |
| 2020-11-10 11:00 | 27.1 |
| 2020-11-10 11:10 | 24.7 |
| 2020-11-10 11:20 | 24.1 |
| 2020-11-10 11:30 | 23.9 |
| 2020-11-10 11:40 | 24.1 |
| 2020-11-10 11:50 | 27.4 |
| 2020-11-10 12:00 | 26.3 |
| 2020-11-10 12:10 | 26.6 |
| 2020-11-10 12:20 | 27.2 |
| 2020-11-10 12:30 | 27.8 |
| 2020-11-10 12:40 | 28.6 |
| 2020-11-10 12:50 | 28.4 |
| 2020-11-10 13:00 | 29.6 |
| 2020-11-10 13:10 | 28.8 |
| 2020-11-10 13:20 | 27.4 |
| 2020-11-10 13:30 | 27.9 |
| 2020-11-10 13:40 | 27.8 |
| 2020-11-10 13:50 | 27.9 |
| 2020-11-10 14:00 | 27.4 |
| 2020-11-10 14:10 | 29.7 |
| 2020-11-10 14:30 | 30.6 |
| 2020-11-10 14:40 | 27.9 |



|                  |      |
|------------------|------|
| 2020-11-10 14:50 | 28.8 |
| 2020-11-10 15:00 | 29   |
| 2020-11-10 15:10 | 29.9 |
| 2020-11-10 15:20 | 28.3 |
| 2020-11-10 15:30 | 28.7 |
| 2020-11-10 15:40 | 29.2 |
| 2020-11-10 15:50 | 27.6 |
| 2020-11-10 16:00 | 28.3 |
| 2020-11-10 16:10 | 28.8 |
| 2020-11-10 16:20 | 28.7 |
| 2020-11-10 16:30 | 28.3 |
| 2020-11-10 16:40 | 28.3 |
| 2020-11-10 16:50 | 27.9 |
| 2020-11-10 17:00 | 28.2 |
| 2020-11-10 17:00 | 28.2 |
| 2020-11-10 17:10 | 27.1 |
| 2020-11-10 17:20 | 26.6 |
| 2020-11-10 17:30 | 26.4 |
| 2020-11-10 17:40 | 26.8 |
| 2020-11-10 17:50 | 26.9 |
| 2020-11-10 18:00 | 25.9 |
| 2020-11-10 18:10 | 25.5 |
| 2020-11-10 18:20 | 25.3 |
| 2020-11-10 18:30 | 24.9 |
| 2020-11-10 18:40 | 24.6 |
| 2020-11-10 18:50 | 24.4 |
| 2020-11-10 19:00 | 24.2 |
| 2020-11-10 19:10 | 24.1 |
| 2020-11-10 19:20 | 23.9 |
| 2020-11-10 19:30 | 23.8 |
| 2020-11-10 19:40 | 23.8 |
| 2020-11-10 19:50 | 23.6 |
| 2020-11-10 20:00 | 23.4 |
| 2020-11-10 20:10 | 23.1 |
| 2020-11-10 20:20 | 22.9 |
| 2020-11-10 20:30 | 22.7 |
| 2020-11-10 20:40 | 22.5 |
| 2020-11-10 20:50 | 22.3 |
| 2020-11-10 21:00 | 22.2 |
| 2020-11-10 21:10 | 22.2 |
| 2020-11-10 21:20 | 22   |
| 2020-11-10 21:30 | 21.9 |
| 2020-11-10 21:40 | 21.6 |
| 2020-11-10 21:50 | 21.6 |
| 2020-11-10 22:00 | 21.6 |
| 2020-11-10 22:10 | 21.4 |
| 2020-11-10 22:20 | 21.3 |
| 2020-11-10 22:30 | 21.4 |
| 2020-11-10 22:40 | 21.4 |
| 2020-11-10 22:50 | 21.4 |



|                  |      |
|------------------|------|
| 2020-11-10 23:00 | 21.3 |
| 2020-11-10 23:10 | 21.4 |
| 2020-11-10 23:20 | 21.5 |
| 2020-11-10 23:30 | 21.3 |
| 2020-11-10 23:40 | 21   |
| 2020-11-10 23:50 | 20.8 |
| 2020-11-11 00:00 | 20.4 |
| 2020-11-11 00:10 | 20.3 |
| 2020-11-11 00:20 | 20.1 |
| 2020-11-11 00:30 | 20.2 |
| 2020-11-11 00:40 | 20.1 |
| 2020-11-11 00:50 | 19.9 |
| 2020-11-11 01:00 | 19.7 |
| 2020-11-11 01:10 | 19.8 |
| 2020-11-11 01:20 | 19.8 |
| 2020-11-11 01:30 | 19.7 |
| 2020-11-11 01:40 | 19.6 |
| 2020-11-11 01:50 | 19.8 |
| 2020-11-11 02:00 | 19.9 |
| 2020-11-11 02:10 | 19.7 |
| 2020-11-11 02:20 | 19.5 |
| 2020-11-11 02:30 | 19.5 |
| 2020-11-11 02:40 | 19.4 |
| 2020-11-11 02:50 | 19.1 |
| 2020-11-11 03:00 | 19.1 |
| 2020-11-11 03:10 | 18.9 |
| 2020-11-11 03:20 | 18.8 |
| 2020-11-11 03:30 | 18.9 |
| 2020-11-11 03:40 | 18.8 |
| 2020-11-11 03:50 | 18.7 |
| 2020-11-11 04:00 | 18.6 |
| 2020-11-11 04:10 | 18.7 |
| 2020-11-11 04:20 | 18.7 |
| 2020-11-11 04:30 | 18.8 |
| 2020-11-11 04:40 | 18.8 |
| 2020-11-11 04:50 | 18.8 |
| 2020-11-11 05:00 | 18.8 |
| 2020-11-11 05:10 | 18.7 |
| 2020-11-11 05:20 | 18.6 |
| 2020-11-11 05:30 | 18.4 |
| 2020-11-11 05:40 | 18.4 |
| 2020-11-11 05:50 | 18.4 |
| 2020-11-11 06:00 | 18.4 |
| 2020-11-11 06:10 | 18.4 |
| 2020-11-11 06:20 | 18.5 |
| 2020-11-11 06:30 | 18.6 |
| 2020-11-11 06:40 | 18.8 |
| 2020-11-11 06:50 | 18.9 |
| 2020-11-11 07:00 | 19.1 |
| 2020-11-11 07:10 | 19.4 |



|                  |      |
|------------------|------|
| 2020-11-11 07:20 | 19.8 |
| 2020-11-11 07:30 | 20.7 |
| 2020-11-11 07:40 | 22.1 |
| 2020-11-11 07:50 | 22.5 |
| 2020-11-11 08:00 | 22.4 |
| 2020-11-11 08:10 | 23.4 |
| 2020-11-11 08:20 | 22.9 |
| 2020-11-11 08:30 | 23.5 |
| 2020-11-11 08:40 | 24.1 |
| 2020-11-11 08:50 | 23.7 |
| 2020-11-11 09:00 | 23.9 |
| 2020-11-11 09:10 | 24.4 |
| 2020-11-11 09:20 | 23.4 |
| 2020-11-11 09:30 | 23.6 |
| 2020-11-11 09:40 | 23.9 |
| 2020-11-11 09:50 | 23.4 |
| 2020-11-11 10:00 | 24.1 |
| 2020-11-11 10:10 | 23.7 |
| 2020-11-11 10:20 | 23.4 |
| 2020-11-11 10:30 | 24.8 |
| 2020-11-11 10:40 | 25.2 |
| 2020-11-11 10:50 | 25.9 |
| 2020-11-11 11:00 | 26.3 |
| 2020-11-11 11:10 | 26.3 |
| 2020-11-11 11:20 | 27.3 |
| 2020-11-11 11:30 | 27.6 |
| 2020-11-11 11:40 | 28.8 |
| 2020-11-11 11:50 | 28.4 |
| 2020-11-11 12:00 | 28.9 |
| 2020-11-11 12:10 | 29.4 |
| 2020-11-11 12:20 | 27.8 |
| 2020-11-11 12:30 | 28.6 |
| 2020-11-11 12:40 | 29.8 |
| 2020-11-11 12:50 | 29.9 |
| 2020-11-11 13:00 | 28.8 |
| 2020-11-11 13:10 | 28.3 |
| 2020-11-11 13:20 | 29.4 |
| 2020-11-11 13:30 | 27.1 |
| 2020-11-11 13:40 | 26.6 |
| 2020-11-11 13:50 | 25.1 |
| 2020-11-11 14:00 | 22.5 |
| 2020-11-11 14:10 | 23.3 |
| 2020-11-11 14:20 | 23.4 |
| 2020-11-11 14:30 | 21.3 |
| 2020-11-11 14:40 | 19.7 |
| 2020-11-11 14:50 | 18.3 |
| 2020-11-11 15:00 | 18.2 |
| 2020-11-11 15:10 | 17.8 |
| 2020-11-11 15:20 | 17.6 |
| 2020-11-11 15:30 | 17.2 |



|                  |      |
|------------------|------|
| 2020-11-11 15:40 | 17.9 |
| 2020-11-11 15:50 | 17.8 |
| 2020-11-11 16:00 | 19.3 |
| 2020-11-11 16:10 | 21.3 |
| 2020-11-11 16:20 | 22.3 |
| 2020-11-11 16:30 | 21.4 |
| 2020-11-11 16:40 | 21.1 |
| 2020-11-11 16:50 | 20.8 |
| 2020-11-11 17:00 | 20.6 |
| 2020-11-11 17:10 | 20.6 |
| 2020-11-11 17:20 | 20.8 |
| 2020-11-11 17:30 | 20.8 |
| 2020-11-11 17:40 | 20.6 |
| 2020-11-11 17:50 | 20.4 |
| 2020-11-11 18:00 | 20.3 |
| 2020-11-11 18:10 | 20.4 |
| 2020-11-11 18:20 | 20.7 |
| 2020-11-11 18:30 | 20.6 |
| 2020-11-11 18:40 | 20.4 |
| 2020-11-11 18:50 | 20.2 |
| 2020-11-11 19:00 | 19.8 |
| 2020-11-11 19:10 | 20   |
| 2020-11-11 19:20 | 19.8 |
| 2020-11-11 19:30 | 19.4 |
| 2020-11-11 19:40 | 19.4 |
| 2020-11-11 19:50 | 19.5 |
| 2020-11-11 20:00 | 19.5 |
| 2020-11-11 20:10 | 19.3 |
| 2020-11-11 20:20 | 19.2 |
| 2020-11-11 20:30 | 19.1 |
| 2020-11-11 20:40 | 19.1 |
| 2020-11-11 20:50 | 18.9 |
| 2020-11-11 21:00 | 18.6 |
| 2020-11-11 21:10 | 18.3 |
| 2020-11-11 21:20 | 18.3 |
| 2020-11-11 21:30 | 18.3 |
| 2020-11-11 21:40 | 18.2 |
| 2020-11-11 22:00 | 18.3 |
| 2020-11-11 22:10 | 18.3 |
| 2020-11-11 22:20 | 18.3 |
| 2020-11-11 22:30 | 18.3 |
| 2020-11-11 22:40 | 18.2 |
| 2020-11-11 22:50 | 18   |
| 2020-11-11 23:00 | 18   |
| 2020-11-11 23:10 | 18   |
| 2020-11-11 23:20 | 17.9 |
| 2020-11-11 23:30 | 17.8 |
| 2020-11-11 23:40 | 17.6 |
| 2020-11-11 23:50 | 17.4 |
| 2020-11-12 00:00 | 17.2 |



|                  |      |
|------------------|------|
| 2020-11-12 00:10 | 17.1 |
| 2020-11-12 00:20 | 17.1 |
| 2020-11-12 00:30 | 16.9 |
| 2020-11-12 00:40 | 17   |
| 2020-11-12 00:50 | 16.9 |
| 2020-11-12 01:00 | 16.8 |
| 2020-11-12 01:10 | 16.6 |
| 2020-11-12 01:20 | 16.8 |
| 2020-11-12 01:30 | 16.5 |
| 2020-11-12 01:40 | 16.5 |
| 2020-11-12 01:50 | 16.6 |
| 2020-11-12 02:00 | 16.4 |
| 2020-11-12 02:10 | 16.4 |
| 2020-11-12 02:20 | 16.3 |
| 2020-11-12 02:30 | 16.3 |
| 2020-11-12 02:40 | 16.1 |
| 2020-11-12 02:50 | 15.9 |
| 2020-11-12 03:00 | 15.9 |
| 2020-11-12 03:10 | 15.9 |
| 2020-11-12 03:20 | 15.9 |
| 2020-11-12 03:30 | 15.8 |
| 2020-11-12 03:40 | 15.9 |
| 2020-11-12 03:50 | 15.6 |
| 2020-11-12 04:00 | 15.7 |
| 2020-11-12 04:10 | 15.9 |
| 2020-11-12 04:20 | 15.9 |
| 2020-11-12 04:30 | 16.3 |
| 2020-11-12 04:40 | 16.3 |
| 2020-11-12 04:50 | 16.1 |
| 2020-11-12 05:00 | 15.9 |
| 2020-11-12 05:10 | 15.7 |
| 2020-11-12 05:20 | 15.6 |
| 2020-11-12 05:30 | 15.4 |
| 2020-11-12 05:40 | 15.3 |
| 2020-11-12 05:50 | 15.3 |
| 2020-11-12 06:00 | 15.4 |
| 2020-11-12 06:10 | 15.6 |
| 2020-11-12 06:20 | 15.7 |
| 2020-11-12 06:30 | 15.8 |
| 2020-11-12 06:40 | 16.1 |
| 2020-11-12 06:50 | 16.2 |
| 2020-11-12 07:00 | 16.4 |
| 2020-11-12 07:10 | 16.6 |
| 2020-11-12 07:20 | 17.1 |
| 2020-11-12 07:30 | 16.9 |
| 2020-11-12 07:40 | 17.3 |
| 2020-11-12 07:50 | 18.1 |
| 2020-11-12 08:00 | 17.8 |
| 2020-11-12 08:10 | 18.1 |
| 2020-11-12 08:20 | 19.1 |



|                  |      |
|------------------|------|
| 2020-11-12 08:30 | 20.1 |
| 2020-11-12 08:40 | 19.8 |
| 2020-11-12 08:50 | 20.3 |
| 2020-11-12 09:00 | 20.6 |
| 2020-11-12 09:10 | 21.1 |
| 2020-11-12 09:20 | 22.6 |
| 2020-11-12 09:30 | 23.5 |
| 2020-11-12 09:40 | 24   |
| 2020-11-12 09:50 | 24.1 |
| 2020-11-12 10:00 | 24.5 |
| 2020-11-12 10:10 | 25.3 |
| 2020-11-12 10:20 | 26.1 |
| 2020-11-12 10:30 | 25.6 |
| 2020-11-12 10:40 | 25.7 |
| 2020-11-12 10:50 | 27.1 |
| 2020-11-12 11:00 | 28.6 |
| 2020-11-12 11:10 | 28.4 |
| 2020-11-12 11:20 | 27.2 |
| 2020-11-12 11:30 | 27.6 |
| 2020-11-12 11:40 | 25.6 |
| 2020-11-12 11:50 | 24.8 |
| 2020-11-12 12:00 | 21.9 |
| 2020-11-12 12:10 | 21.4 |
| 2020-11-12 12:20 | 21.8 |
| 2020-11-12 12:30 | 21.9 |
| 2020-11-12 12:40 | 22.3 |
| 2020-11-12 12:50 | 21.5 |
| 2020-11-12 13:00 | 20.4 |
| 2020-11-12 13:10 | 20.6 |
| 2020-11-12 13:20 | 20.6 |
| 2020-11-12 13:30 | 20.8 |
| 2020-11-12 13:40 | 20.6 |
| 2020-11-12 13:50 | 20.4 |
| 2020-11-12 14:00 | 21.4 |
| 2020-11-12 14:10 | 21.8 |
| 2020-11-12 14:20 | 22.3 |
| 2020-11-12 14:30 | 22.5 |
| 2020-11-12 14:40 | 24.1 |
| 2020-11-12 14:50 | 25.4 |
| 2020-11-12 15:00 | 25.6 |
| 2020-11-12 15:10 | 25.4 |
| 2020-11-12 15:20 | 24.3 |
| 2020-11-12 15:30 | 23.8 |
| 2020-11-12 15:40 | 23.3 |
| 2020-11-12 15:50 | 23.4 |
| 2020-11-12 16:00 | 23   |
| 2020-11-12 16:10 | 22.9 |
| 2020-11-12 16:20 | 25   |
| 2020-11-12 16:30 | 24.4 |
| 2020-11-12 16:40 | 25.3 |



|                  |      |
|------------------|------|
| 2020-11-12 16:50 | 25.1 |
| 2020-11-12 17:00 | 25.4 |
| 2020-11-12 17:10 | 25.6 |
| 2020-11-12 17:20 | 26.8 |
| 2020-11-12 17:30 | 26.8 |
| 2020-11-12 17:40 | 27.2 |
| 2020-11-12 17:50 | 25.3 |
| 2020-11-12 18:00 | 23.7 |
| 2020-11-12 18:10 | 22.9 |
| 2020-11-12 18:20 | 22.4 |
| 2020-11-12 18:30 | 21.8 |
| 2020-11-12 18:40 | 21.3 |
| 2020-11-12 18:50 | 20.9 |
| 2020-11-12 19:00 | 20.7 |
| 2020-11-12 19:10 | 20.5 |
| 2020-11-12 19:20 | 20.4 |
| 2020-11-12 19:30 | 20.3 |
| 2020-11-12 19:40 | 20.3 |
| 2020-11-12 19:50 | 20.3 |
| 2020-11-12 20:00 | 20.3 |
| 2020-11-12 20:10 | 20.2 |
| 2020-11-12 20:20 | 20   |
| 2020-11-12 20:30 | 19.9 |
| 2020-11-12 20:40 | 19.8 |
| 2020-11-12 20:40 | 19.8 |
| 2020-11-12 20:50 | 19.6 |
| 2020-11-12 21:00 | 19.4 |
| 2020-11-12 21:10 | 19.3 |
| 2020-11-12 21:20 | 19.2 |
| 2020-11-12 21:30 | 18.9 |
| 2020-11-12 21:40 | 18.7 |
| 2020-11-12 21:50 | 18.5 |
| 2020-11-12 22:00 | 18.5 |
| 2020-11-12 22:10 | 18.4 |
| 2020-11-12 22:20 | 18.4 |
| 2020-11-12 22:30 | 17.8 |
| 2020-11-12 22:40 | 17.6 |
| 2020-11-12 22:50 | 17.8 |
| 2020-11-12 23:00 | 17.9 |
| 2020-11-12 23:10 | 18.1 |
| 2020-11-12 23:20 | 18.1 |
| 2020-11-12 23:30 | 17.9 |
| 2020-11-12 23:40 | 17.8 |
| 2020-11-12 23:50 | 17.6 |
| 2020-11-13 00:00 | 17.1 |
| 2020-11-13 00:10 | 16.9 |
| 2020-11-13 00:20 | 16.9 |
| 2020-11-13 00:30 | 16.9 |
| 2020-11-13 00:40 | 17.1 |
| 2020-11-13 00:50 | 16.9 |



|                  |      |
|------------------|------|
| 2020-11-13 01:00 | 16.9 |
| 2020-11-13 01:10 | 16.8 |
| 2020-11-13 01:20 | 16.7 |
| 2020-11-13 01:30 | 16.5 |
| 2020-11-13 01:40 | 16.5 |
| 2020-11-13 01:50 | 16.3 |
| 2020-11-13 02:00 | 16.4 |
| 2020-11-13 02:10 | 16.2 |
| 2020-11-13 02:20 | 16   |
| 2020-11-13 02:30 | 15.8 |
| 2020-11-13 02:40 | 15.8 |
| 2020-11-13 02:50 | 15.8 |
| 2020-11-13 03:00 | 15.6 |
| 2020-11-13 03:10 | 15.6 |
| 2020-11-13 03:20 | 15.2 |
| 2020-11-13 03:30 | 15.3 |
| 2020-11-13 03:40 | 15.6 |
| 2020-11-13 03:50 | 15.6 |
| 2020-11-13 04:00 | 15.4 |
| 2020-11-13 04:10 | 15.3 |
| 2020-11-13 04:20 | 15.6 |
| 2020-11-13 04:30 | 15.4 |
| 2020-11-13 04:40 | 14.8 |
| 2020-11-13 04:50 | 14.4 |
| 2020-11-13 05:00 | 14.4 |
| 2020-11-13 05:10 | 14.4 |
| 2020-11-13 05:20 | 14.3 |
| 2020-11-13 05:30 | 14.4 |
| 2020-11-13 05:40 | 14.6 |
| 2020-11-13 05:50 | 14.6 |
| 2020-11-13 06:00 | 14.9 |
| 2020-11-13 06:10 | 15.6 |
| 2020-11-13 06:20 | 16.6 |
| 2020-11-13 06:30 | 18.1 |
| 2020-11-13 06:40 | 18.6 |
| 2020-11-13 06:50 | 18.4 |
| 2020-11-13 07:00 | 19.1 |
| 2020-11-13 07:10 | 19.9 |
| 2020-11-13 07:20 | 20.5 |
| 2020-11-13 07:30 | 21.4 |
| 2020-11-13 07:40 | 22.1 |
| 2020-11-13 07:50 | 22.7 |
| 2020-11-13 08:00 | 22.9 |
| 2020-11-13 08:10 | 23.2 |
| 2020-11-13 08:20 | 24.9 |
| 2020-11-13 08:30 | 24.8 |
| 2020-11-13 08:40 | 25.5 |
| 2020-11-13 08:50 | 26.1 |
| 2020-11-13 09:00 | 27.8 |
| 2020-11-13 09:10 | 27.6 |



|                  |      |
|------------------|------|
| 2020-11-13 09:20 | 24.8 |
| 2020-11-13 09:30 | 26.9 |
| 2020-11-13 09:40 | 27   |
| 2020-11-13 09:50 | 25.1 |
| 2020-11-13 10:00 | 28.1 |
| 2020-11-13 10:10 | 28.6 |
| 2020-11-13 10:20 | 26.4 |
| 2020-11-13 10:30 | 27.8 |
| 2020-11-13 10:40 | 27.1 |
| 2020-11-13 10:50 | 27.8 |
| 2020-11-13 11:00 | 28.3 |
| 2020-11-13 11:10 | 28.6 |
| 2020-11-13 11:20 | 28.8 |
| 2020-11-13 11:30 | 29.6 |
| 2020-11-13 11:40 | 28.9 |
| 2020-11-13 11:50 | 30.7 |
| 2020-11-13 12:00 | 29.9 |
| 2020-11-13 12:10 | 30.4 |
| 2020-11-13 12:20 | 30.8 |
| 2020-11-13 12:30 | 31.1 |
| 2020-11-13 12:40 | 28.1 |
| 2020-11-13 12:50 | 30.9 |
| 2020-11-13 13:00 | 29   |
| 2020-11-13 13:10 | 31.4 |
| 2020-11-13 13:20 | 29.3 |
| 2020-11-13 13:30 | 30   |
| 2020-11-13 13:40 | 32.1 |
| 2020-11-13 13:50 | 30.1 |
| 2020-11-13 14:00 | 30.4 |
| 2020-11-13 14:10 | 31.2 |
| 2020-11-13 14:20 | 30.8 |
| 2020-11-13 14:30 | 32.3 |
| 2020-11-13 14:40 | 31.2 |
| 2020-11-13 14:50 | 30.8 |
| 2020-11-13 15:00 | 29.2 |
| 2020-11-13 15:10 | 31.8 |
| 2020-11-13 15:20 | 32.3 |
| 2020-11-13 15:30 | 34.8 |
| 2020-11-13 15:40 | 31.6 |
| 2020-11-13 15:50 | 32.3 |
| 2020-11-13 16:00 | 31.9 |
| 2020-11-13 16:00 | 31.9 |
| 2020-11-13 16:10 | 31.3 |
| 2020-11-13 16:20 | 29.8 |
| 2020-11-13 16:30 | 31.3 |
| 2020-11-13 16:40 | 30.8 |
| 2020-11-13 16:50 | 29.1 |
| 2020-11-13 17:00 | 29.3 |
| 2020-11-13 17:10 | 27.9 |
| 2020-11-13 17:20 | 27.5 |



|                  |      |
|------------------|------|
| 2020-11-13 17:30 | 27.4 |
| 2020-11-13 17:40 | 27.3 |
| 2020-11-13 17:50 | 27.2 |
| 2020-11-13 18:00 | 27.5 |
| 2020-11-13 18:10 | 28   |
| 2020-11-13 18:20 | 27.4 |
| 2020-11-13 18:30 | 26.9 |
| 2020-11-13 18:40 | 26.4 |
| 2020-11-13 18:50 | 25.9 |
| 2020-11-13 19:00 | 25.4 |
| 2020-11-13 19:10 | 25   |
| 2020-11-13 19:20 | 24.8 |
| 2020-11-13 19:30 | 24.6 |
| 2020-11-13 19:40 | 24.4 |
| 2020-11-13 19:50 | 24.2 |
| 2020-11-13 20:00 | 23.9 |
| 2020-11-13 20:10 | 23.9 |
| 2020-11-13 20:20 | 23.7 |
| 2020-11-13 20:30 | 23.6 |
| 2020-11-13 20:40 | 23.5 |
| 2020-11-13 20:50 | 23.6 |
| 2020-11-13 21:00 | 23.6 |
| 2020-11-13 21:10 | 23.1 |
| 2020-11-13 21:20 | 22.9 |
| 2020-11-13 21:30 | 22.8 |
| 2020-11-13 21:40 | 22.7 |
| 2020-11-13 21:50 | 22.3 |
| 2020-11-13 22:00 | 22.3 |
| 2020-11-13 22:10 | 21.8 |
| 2020-11-13 22:20 | 21.8 |
| 2020-11-13 22:30 | 21.4 |
| 2020-11-13 22:40 | 21.1 |
| 2020-11-13 22:50 | 21   |
| 2020-11-13 23:00 | 20.6 |
| 2020-11-13 23:10 | 20.6 |
| 2020-11-13 23:20 | 20.6 |
| 2020-11-13 23:30 | 20.4 |
| 2020-11-13 23:40 | 20.1 |
| 2020-11-13 23:50 | 19.9 |
| 2020-11-14 00:00 | 20   |
| 2020-11-14 00:10 | 19.9 |
| 2020-11-14 00:20 | 19.6 |
| 2020-11-14 00:30 | 19.4 |
| 2020-11-14 00:40 | 19.1 |
| 2020-11-14 00:50 | 19.1 |
| 2020-11-14 01:00 | 19   |
| 2020-11-14 01:10 | 18.9 |
| 2020-11-14 01:20 | 18.8 |
| 2020-11-14 01:30 | 18.6 |
| 2020-11-14 01:40 | 18.6 |



|                  |      |
|------------------|------|
| 2020-11-14 01:50 | 18.4 |
| 2020-11-14 02:00 | 18.1 |
| 2020-11-14 02:10 | 17.8 |
| 2020-11-14 02:20 | 17.3 |
| 2020-11-14 02:30 | 17.8 |
| 2020-11-14 02:40 | 17.6 |
| 2020-11-14 02:50 | 17.3 |
| 2020-11-14 03:00 | 17.3 |
| 2020-11-14 03:10 | 16.7 |
| 2020-11-14 03:20 | 16.5 |
| 2020-11-14 03:30 | 16.7 |
| 2020-11-14 03:40 | 16.8 |
| 2020-11-14 03:50 | 16.8 |
| 2020-11-14 04:00 | 16.8 |
| 2020-11-14 04:10 | 16.8 |
| 2020-11-14 04:20 | 17.1 |
| 2020-11-14 04:30 | 17.3 |
| 2020-11-14 04:40 | 17.1 |
| 2020-11-14 04:50 | 16.9 |
| 2020-11-14 05:00 | 16.8 |
| 2020-11-14 05:10 | 16.8 |
| 2020-11-14 05:20 | 16.8 |
| 2020-11-14 05:30 | 16.8 |
| 2020-11-14 05:40 | 16.9 |
| 2020-11-14 05:50 | 17   |
| 2020-11-14 06:00 | 17.3 |
| 2020-11-14 06:10 | 17.9 |
| 2020-11-14 06:20 | 18.5 |
| 2020-11-14 06:30 | 19.1 |
| 2020-11-14 06:40 | 19.6 |
| 2020-11-14 06:50 | 20.2 |
| 2020-11-14 07:00 | 20.7 |
| 2020-11-14 07:10 | 21.2 |
| 2020-11-14 07:20 | 21.6 |
| 2020-11-14 07:30 | 22.2 |
| 2020-11-14 07:40 | 23   |
| 2020-11-14 07:50 | 23.4 |
| 2020-11-14 08:00 | 24.3 |
| 2020-11-14 08:10 | 24.3 |
| 2020-11-14 08:20 | 24.1 |
| 2020-11-14 08:30 | 24.9 |
| 2020-11-14 08:40 | 25.3 |
| 2020-11-14 08:50 | 25.4 |
| 2020-11-14 09:00 | 25.6 |
| 2020-11-14 09:10 | 25.9 |
| 2020-11-14 09:20 | 25.3 |
| 2020-11-14 09:30 | 26.1 |
| 2020-11-14 09:40 | 26.9 |
| 2020-11-14 09:50 | 27.4 |
| 2020-11-14 10:00 | 27.2 |



|                  |      |
|------------------|------|
| 2020-11-14 10:10 | 28.2 |
| 2020-11-14 10:20 | 28.3 |
| 2020-11-14 10:30 | 28.4 |
| 2020-11-14 10:40 | 29.8 |
| 2020-11-14 10:50 | 30.2 |
| 2020-11-14 11:00 | 30.4 |
| 2020-11-14 11:10 | 32.1 |
| 2020-11-14 11:20 | 31.5 |
| 2020-11-14 11:30 | 31.8 |
| 2020-11-14 11:40 | 32.9 |
| 2020-11-14 11:50 | 32.4 |
| 2020-11-14 12:00 | 31.5 |
| 2020-11-14 12:10 | 31.3 |
| 2020-11-14 12:20 | 32.6 |
| 2020-11-14 12:30 | 33.7 |
| 2020-11-14 12:40 | 33.3 |
| 2020-11-14 12:50 | 34.3 |
| 2020-11-14 13:00 | 33.4 |
| 2020-11-14 13:10 | 34.1 |
| 2020-11-14 13:20 | 34.4 |
| 2020-11-14 13:30 | 34.2 |
| 2020-11-14 13:40 | 34.3 |
| 2020-11-14 13:50 | 32.9 |
| 2020-11-14 14:00 | 34.4 |
| 2020-11-14 14:10 | 34.3 |
| 2020-11-14 14:20 | 33.6 |
| 2020-11-14 14:30 | 34.8 |
| 2020-11-14 14:40 | 34.3 |
| 2020-11-14 14:50 | 35.4 |
| 2020-11-14 15:00 | 35.8 |
| 2020-11-14 15:10 | 35.9 |
| 2020-11-14 15:20 | 33.5 |
| 2020-11-14 15:30 | 34.8 |
| 2020-11-14 15:40 | 34.1 |
| 2020-11-14 15:50 | 35   |
| 2020-11-14 16:00 | 35.5 |
| 2020-11-14 16:10 | 34.5 |
| 2020-11-14 16:20 | 34.3 |
| 2020-11-14 16:30 | 33.2 |
| 2020-11-14 16:40 | 32.9 |
| 2020-11-14 16:50 | 34   |
| 2020-11-14 17:00 | 34.4 |
| 2020-11-14 17:10 | 33.9 |
| 2020-11-14 17:20 | 32.3 |
| 2020-11-14 17:30 | 33.6 |
| 2020-11-14 17:40 | 34.8 |
| 2020-11-14 17:50 | 33.7 |
| 2020-11-14 18:00 | 32.8 |
| 2020-11-14 18:10 | 31.6 |
| 2020-11-14 18:20 | 31   |



|                  |      |
|------------------|------|
| 2020-11-14 18:30 | 30.1 |
| 2020-11-14 18:40 | 29.4 |
| 2020-11-14 18:50 | 28.9 |
| 2020-11-14 19:00 | 28.3 |
| 2020-11-14 19:10 | 27.8 |
| 2020-11-14 19:20 | 27.6 |
| 2020-11-14 19:30 | 27.2 |
| 2020-11-14 19:40 | 27.1 |
| 2020-11-14 19:50 | 27   |
| 2020-11-14 20:00 | 26.3 |
| 2020-11-14 20:10 | 26.3 |
| 2020-11-14 20:20 | 25.9 |
| 2020-11-14 20:30 | 25.4 |
| 2020-11-14 20:40 | 26.1 |
| 2020-11-14 20:50 | 25.9 |
| 2020-11-14 21:00 | 25.4 |
| 2020-11-14 21:10 | 25.4 |
| 2020-11-14 21:20 | 25.8 |
| 2020-11-14 21:30 | 25.9 |
| 2020-11-14 21:40 | 26.3 |
| 2020-11-14 21:50 | 26.7 |
| 2020-11-14 22:00 | 26.4 |
| 2020-11-14 22:10 | 25.9 |
| 2020-11-14 22:20 | 25.1 |
| 2020-11-14 22:30 | 24.9 |
| 2020-11-14 22:40 | 25.9 |
| 2020-11-14 22:50 | 26.4 |
| 2020-11-14 23:00 | 25.4 |
| 2020-11-14 23:10 | 25.4 |
| 2020-11-14 23:20 | 25.6 |
| 2020-11-14 23:30 | 25.6 |
| 2020-11-14 23:40 | 25.6 |
| 2020-11-14 23:50 | 25.2 |
| 2020-11-15 00:00 | 25.5 |
| 2020-11-15 00:10 | 25.4 |
| 2020-11-15 00:20 | 25.4 |
| 2020-11-15 00:30 | 25.6 |
| 2020-11-15 00:40 | 25.7 |
| 2020-11-15 00:50 | 25.5 |
| 2020-11-15 01:00 | 25.4 |
| 2020-11-15 01:10 | 25.4 |
| 2020-11-15 01:20 | 25.9 |
| 2020-11-15 01:30 | 25.8 |
| 2020-11-15 01:40 | 25.4 |
| 2020-11-15 01:50 | 25.6 |
| 2020-11-15 02:00 | 25.6 |
| 2020-11-15 02:10 | 25.2 |
| 2020-11-15 02:20 | 25.1 |
| 2020-11-15 02:30 | 24.8 |
| 2020-11-15 02:40 | 24.2 |



|                  |      |
|------------------|------|
| 2020-11-15 02:50 | 24.2 |
| 2020-11-15 03:00 | 24.1 |
| 2020-11-15 03:10 | 23.8 |
| 2020-11-15 03:20 | 23.6 |
| 2020-11-15 03:30 | 23.5 |
| 2020-11-15 03:40 | 23.1 |
| 2020-11-15 03:50 | 22.7 |
| 2020-11-15 04:00 | 22.5 |
| 2020-11-15 04:10 | 22.3 |
| 2020-11-15 04:20 | 22.3 |
| 2020-11-15 04:30 | 22.3 |
| 2020-11-15 04:40 | 22.2 |
| 2020-11-15 04:50 | 22   |
| 2020-11-15 05:00 | 21.9 |
| 2020-11-15 05:10 | 21.7 |
| 2020-11-15 05:20 | 21.4 |
| 2020-11-15 05:30 | 21.3 |
| 2020-11-15 05:40 | 21.1 |
| 2020-11-15 05:50 | 21.3 |
| 2020-11-15 06:00 | 21.7 |
| 2020-11-15 06:10 | 22.1 |
| 2020-11-15 06:20 | 22.1 |
| 2020-11-15 06:30 | 22.3 |
| 2020-11-15 06:40 | 22.5 |
| 2020-11-15 06:50 | 22.6 |
| 2020-11-15 07:00 | 22.9 |
| 2020-11-15 07:10 | 23.1 |
| 2020-11-15 07:20 | 23.6 |
| 2020-11-15 07:30 | 24.3 |
| 2020-11-15 07:40 | 25.3 |
| 2020-11-15 07:50 | 25.1 |
| 2020-11-15 08:00 | 26.4 |
| 2020-11-15 08:10 | 26.7 |
| 2020-11-15 08:20 | 26.6 |
| 2020-11-15 08:30 | 26.9 |
| 2020-11-15 08:40 | 27.1 |
| 2020-11-15 08:50 | 26.4 |
| 2020-11-15 09:00 | 27.1 |
| 2020-11-15 09:10 | 27.9 |
| 2020-11-15 09:20 | 27   |
| 2020-11-15 09:30 | 27.1 |
| 2020-11-15 09:40 | 27.3 |
| 2020-11-15 09:50 | 26.9 |
| 2020-11-15 10:00 | 27.9 |
| 2020-11-15 10:10 | 28.6 |
| 2020-11-15 10:20 | 27.9 |
| 2020-11-15 10:30 | 27.4 |
| 2020-11-15 10:40 | 27.1 |
| 2020-11-15 10:50 | 27.4 |
| 2020-11-15 11:00 | 27.7 |



|                  |      |
|------------------|------|
| 2020-11-15 11:10 | 28.9 |
| 2020-11-15 11:20 | 28.9 |
| 2020-11-15 11:30 | 28.3 |
| 2020-11-15 11:40 | 28   |
| 2020-11-15 11:50 | 27.9 |
| 2020-11-15 12:00 | 28.4 |
| 2020-11-15 12:10 | 29.7 |
| 2020-11-15 12:20 | 29.3 |
| 2020-11-15 12:30 | 30.3 |
| 2020-11-15 12:40 | 30.7 |
| 2020-11-15 12:50 | 30.2 |
| 2020-11-15 13:00 | 30.3 |
| 2020-11-15 13:10 | 31.3 |
| 2020-11-15 13:20 | 30   |
| 2020-11-15 13:30 | 30.1 |
| 2020-11-15 13:40 | 30.1 |
| 2020-11-15 13:50 | 28.9 |
| 2020-11-15 14:00 | 29.2 |
| 2020-11-15 14:10 | 29.1 |
| 2020-11-15 14:20 | 28.9 |
| 2020-11-15 14:30 | 28   |
| 2020-11-15 14:40 | 28.3 |
| 2020-11-15 14:50 | 27.6 |
| 2020-11-15 15:00 | 27.6 |
| 2020-11-15 15:10 | 27.2 |
| 2020-11-15 15:20 | 26.8 |
| 2020-11-15 15:30 | 26.6 |
| 2020-11-15 15:40 | 26.5 |
| 2020-11-15 15:50 | 26.4 |
| 2020-11-15 16:00 | 26.3 |
| 2020-11-15 16:10 | 26.1 |
| 2020-11-15 16:20 | 26.3 |
| 2020-11-15 16:30 | 26.2 |
| 2020-11-15 16:40 | 26.1 |
| 2020-11-15 16:50 | 26.4 |
| 2020-11-15 17:00 | 26.6 |
| 2020-11-15 17:10 | 26.3 |
| 2020-11-15 17:20 | 25.9 |
| 2020-11-15 17:30 | 25.3 |
| 2020-11-15 17:40 | 24   |
| 2020-11-15 17:50 | 23.4 |
| 2020-11-15 18:00 | 23.6 |
| 2020-11-15 18:10 | 23.3 |
| 2020-11-15 18:20 | 23.1 |
| 2020-11-15 18:30 | 22.9 |
| 2020-11-15 18:40 | 22.8 |
| 2020-11-15 18:50 | 22.6 |
| 2020-11-15 19:00 | 22.6 |
| 2020-11-15 19:10 | 22.6 |
| 2020-11-15 19:20 | 22.4 |



|                  |      |
|------------------|------|
| 2020-11-15 19:30 | 22.2 |
| 2020-11-15 19:40 | 22.1 |
| 2020-11-15 19:50 | 22.1 |
| 2020-11-15 20:00 | 21.8 |
| 2020-11-15 20:10 | 21.6 |
| 2020-11-15 20:20 | 21.5 |
| 2020-11-15 20:30 | 21.4 |
| 2020-11-15 20:40 | 21.4 |
| 2020-11-15 20:50 | 21.4 |
| 2020-11-15 21:00 | 21.6 |
| 2020-11-15 21:10 | 21.6 |
| 2020-11-15 21:20 | 21.3 |
| 2020-11-15 21:30 | 21.3 |
| 2020-11-15 21:40 | 21.1 |
| 2020-11-15 21:50 | 21   |
| 2020-11-15 22:00 | 20.9 |
| 2020-11-15 22:10 | 20.9 |
| 2020-11-15 22:20 | 20.9 |
| 2020-11-15 22:30 | 21   |
| 2020-11-15 22:40 | 21.1 |
| 2020-11-15 22:50 | 21   |
| 2020-11-15 23:00 | 20.9 |
| 2020-11-15 23:10 | 20.7 |
| 2020-11-15 23:20 | 20.4 |
| 2020-11-15 23:30 | 20.4 |
| 2020-11-15 23:40 | 20.2 |
| 2020-11-15 23:50 | 19.6 |
| 2020-11-16 00:00 | 19.2 |
| 2020-11-16 00:10 | 19.1 |
| 2020-11-16 00:20 | 19.1 |
| 2020-11-16 00:30 | 19.1 |
| 2020-11-16 00:40 | 18.9 |
| 2020-11-16 00:50 | 19.1 |
| 2020-11-16 01:00 | 18.9 |
| 2020-11-16 01:10 | 18.6 |
| 2020-11-16 01:20 | 18.3 |
| 2020-11-16 01:30 | 18.5 |
| 2020-11-16 01:40 | 18.7 |
| 2020-11-16 01:50 | 18.7 |
| 2020-11-16 02:00 | 18.4 |
| 2020-11-16 02:10 | 18.1 |
| 2020-11-16 02:20 | 18.1 |
| 2020-11-16 02:30 | 18.1 |
| 2020-11-16 02:40 | 18   |
| 2020-11-16 02:50 | 18   |
| 2020-11-16 03:00 | 18.3 |
| 2020-11-16 03:10 | 18.3 |
| 2020-11-16 03:20 | 18.4 |
| 2020-11-16 03:30 | 18.2 |
| 2020-11-16 03:40 | 17.9 |



|                  |      |
|------------------|------|
| 2020-11-16 03:50 | 18.2 |
| 2020-11-16 04:00 | 18.3 |
| 2020-11-16 04:10 | 18.4 |
| 2020-11-16 04:20 | 18.4 |
| 2020-11-16 04:30 | 18.3 |
| 2020-11-16 04:40 | 18.3 |
| 2020-11-16 04:50 | 18.3 |
| 2020-11-16 05:00 | 18.4 |
| 2020-11-16 05:10 | 18.4 |
| 2020-11-16 05:20 | 18.1 |
| 2020-11-16 05:30 | 18.1 |
| 2020-11-16 05:40 | 17.9 |
| 2020-11-16 05:50 | 18.1 |
| 2020-11-16 06:00 | 18.3 |
| 2020-11-16 06:10 | 18.6 |
| 2020-11-16 06:20 | 18.9 |
| 2020-11-16 06:30 | 19.1 |
| 2020-11-16 06:40 | 19.3 |
| 2020-11-16 06:50 | 20.1 |
| 2020-11-16 07:00 | 20.7 |
| 2020-11-16 07:10 | 21.2 |
| 2020-11-16 07:20 | 20.9 |
| 2020-11-16 07:30 | 20.4 |
| 2020-11-16 07:40 | 20.6 |
| 2020-11-16 07:50 | 20.7 |
| 2020-11-16 08:00 | 21.3 |
| 2020-11-16 08:10 | 21.8 |
| 2020-11-16 08:20 | 21.8 |
| 2020-11-16 08:30 | 22.2 |
| 2020-11-16 08:40 | 22.8 |
| 2020-11-16 08:50 | 23.4 |
| 2020-11-16 09:00 | 24.4 |
| 2020-11-16 09:10 | 24.3 |
| 2020-11-16 09:20 | 25.3 |
| 2020-11-16 09:30 | 26.1 |
| 2020-11-16 09:40 | 26.8 |
| 2020-11-16 09:50 | 26.9 |
| 2020-11-16 10:00 | 25.4 |
| 2020-11-16 10:10 | 25.8 |
| 2020-11-16 10:20 | 26.4 |
| 2020-11-16 10:30 | 25.6 |
| 2020-11-16 10:40 | 25.4 |
| 2020-11-16 10:50 | 27.7 |
| 2020-11-16 11:00 | 28.3 |
| 2020-11-16 11:10 | 29.4 |
| 2020-11-16 11:20 | 28   |
| 2020-11-16 11:30 | 27.4 |
| 2020-11-16 11:40 | 29   |
| 2020-11-16 11:50 | 28.9 |
| 2020-11-16 12:00 | 29.1 |



|                  |      |
|------------------|------|
| 2020-11-16 12:10 | 28.6 |
| 2020-11-16 12:20 | 28.8 |
| 2020-11-16 12:30 | 28.6 |
| 2020-11-16 12:40 | 29.9 |
| 2020-11-16 12:50 | 30.8 |
| 2020-11-16 13:00 | 28.5 |
| 2020-11-16 13:10 | 30.9 |
| 2020-11-16 13:20 | 30.6 |
| 2020-11-16 13:30 | 31.9 |
| 2020-11-16 13:40 | 31.6 |
| 2020-11-16 13:50 | 31.4 |
| 2020-11-16 14:00 | 31.3 |
| 2020-11-16 14:10 | 31.5 |
| 2020-11-16 14:20 | 29.1 |
| 2020-11-16 14:30 | 29.3 |
| 2020-11-16 14:40 | 29.1 |
| 2020-11-16 14:50 | 28.3 |
| 2020-11-16 15:00 | 26.2 |
| 2020-11-16 15:10 | 22.6 |
| 2020-11-16 15:20 | 22.5 |
| 2020-11-16 15:30 | 20.7 |
| 2020-11-16 15:40 | 19.9 |
| 2020-11-16 15:50 | 19.3 |
| 2020-11-16 16:00 | 18.9 |
| 2020-11-16 16:10 | 19.4 |
| 2020-11-16 16:20 | 19.3 |
| 2020-11-16 16:30 | 19.4 |
| 2020-11-16 16:40 | 19.3 |
| 2020-11-16 16:50 | 19.5 |
| 2020-11-16 17:00 | 19.9 |
| 2020-11-16 17:10 | 19.6 |
| 2020-11-16 17:20 | 19.4 |
| 2020-11-16 17:30 | 19.8 |
| 2020-11-16 17:40 | 20.2 |
| 2020-11-16 17:50 | 20.4 |
| 2020-11-16 18:00 | 19.8 |
| 2020-11-16 18:10 | 19.6 |
| 2020-11-16 18:20 | 19.8 |
| 2020-11-16 18:30 | 19.3 |
| 2020-11-16 18:40 | 18.9 |
| 2020-11-16 18:50 | 18.8 |
| 2020-11-16 19:00 | 18.7 |
| 2020-11-16 19:10 | 18.5 |
| 2020-11-16 19:20 | 18.4 |
| 2020-11-16 19:30 | 18.3 |
| 2020-11-16 19:40 | 18.3 |
| 2020-11-16 19:50 | 18.3 |
| 2020-11-16 20:00 | 18.3 |
| 2020-11-16 20:10 | 18.1 |
| 2020-11-16 20:20 | 18.1 |



|                  |      |
|------------------|------|
| 2020-11-16 20:30 | 18.3 |
| 2020-11-16 20:40 | 18.3 |
| 2020-11-16 20:50 | 18.4 |
| 2020-11-16 21:00 | 18.3 |
| 2020-11-16 21:10 | 18.2 |
| 2020-11-16 21:20 | 18.1 |
| 2020-11-16 21:30 | 18.2 |
| 2020-11-16 21:40 | 18   |
| 2020-11-16 21:50 | 17.9 |
| 2020-11-16 22:00 | 17.9 |
| 2020-11-16 22:10 | 17.7 |
| 2020-11-16 22:20 | 17.6 |
| 2020-11-16 22:30 | 17.6 |
| 2020-11-16 22:40 | 17.4 |
| 2020-11-16 22:50 | 17.4 |
| 2020-11-16 23:00 | 17.4 |
| 2020-11-16 23:10 | 17.2 |
| 2020-11-16 23:20 | 17.1 |
| 2020-11-16 23:30 | 16.9 |
| 2020-11-16 23:40 | 16.7 |
| 2020-11-16 23:50 | 16.6 |
| 2020-11-17 00:00 | 16.4 |
| 2020-11-17 00:10 | 16.3 |
| 2020-11-17 00:20 | 16.1 |
| 2020-11-17 00:30 | 15.9 |
| 2020-11-17 00:40 | 15.8 |
| 2020-11-17 00:50 | 15.6 |
| 2020-11-17 01:00 | 15.6 |
| 2020-11-17 01:10 | 15.4 |
| 2020-11-17 01:20 | 15.3 |
| 2020-11-17 01:30 | 15.2 |
| 2020-11-17 01:40 | 15.1 |
| 2020-11-17 01:50 | 15   |
| 2020-11-17 02:00 | 14.9 |
| 2020-11-17 02:10 | 14.8 |
| 2020-11-17 02:20 | 14.7 |
| 2020-11-17 02:30 | 14.6 |
| 2020-11-17 02:40 | 14.6 |
| 2020-11-17 02:50 | 14.8 |
| 2020-11-17 03:00 | 14.9 |
| 2020-11-17 03:10 | 14.7 |
| 2020-11-17 03:20 | 14.4 |
| 2020-11-17 03:30 | 14.3 |
| 2020-11-17 03:40 | 14.3 |
| 2020-11-17 03:50 | 14.2 |
| 2020-11-17 04:00 | 14   |
| 2020-11-17 04:10 | 13.9 |
| 2020-11-17 04:20 | 13.8 |
| 2020-11-17 04:30 | 13.6 |
| 2020-11-17 04:40 | 13.6 |



|                  |      |
|------------------|------|
| 2020-11-17 04:50 | 13.4 |
| 2020-11-17 05:00 | 13.3 |
| 2020-11-17 05:10 | 13.4 |
| 2020-11-17 05:20 | 13.4 |
| 2020-11-17 05:30 | 13.6 |
| 2020-11-17 05:40 | 13.6 |
| 2020-11-17 05:50 | 13.6 |
| 2020-11-17 06:00 | 13.6 |
| 2020-11-17 06:10 | 13.9 |
| 2020-11-17 06:20 | 14.1 |
| 2020-11-17 06:30 | 14.5 |
| 2020-11-17 06:40 | 14.9 |
| 2020-11-17 06:50 | 15.5 |
| 2020-11-17 07:00 | 15.9 |
| 2020-11-17 07:10 | 16.2 |
| 2020-11-17 07:20 | 16.6 |
| 2020-11-17 07:30 | 16.4 |
| 2020-11-17 07:40 | 16.2 |
| 2020-11-17 07:50 | 17.7 |
| 2020-11-17 08:00 | 16.4 |
| 2020-11-17 08:10 | 16.4 |
| 2020-11-17 08:20 | 17.6 |
| 2020-11-17 08:30 | 18.8 |
| 2020-11-17 08:40 | 18.7 |
| 2020-11-17 08:50 | 19.2 |
| 2020-11-17 09:00 | 19   |
| 2020-11-17 09:10 | 20.3 |
| 2020-11-17 09:20 | 21.2 |
| 2020-11-17 09:30 | 21.3 |
| 2020-11-17 09:40 | 21.6 |
| 2020-11-17 09:50 | 21.9 |
| 2020-11-17 10:00 | 21.9 |
| 2020-11-17 10:10 | 22.5 |
| 2020-11-17 10:20 | 23.4 |
| 2020-11-17 10:30 | 23.3 |
| 2020-11-17 10:40 | 22.9 |
| 2020-11-17 10:50 | 23.9 |
| 2020-11-17 11:00 | 23.6 |
| 2020-11-17 11:10 | 24.5 |
| 2020-11-17 11:20 | 25.2 |
| 2020-11-17 11:30 | 24.9 |
| 2020-11-17 11:40 | 26.6 |
| 2020-11-17 11:50 | 25.6 |
| 2020-11-17 12:00 | 25.3 |
| 2020-11-17 12:10 | 26.4 |
| 2020-11-17 12:20 | 25.8 |
| 2020-11-17 12:30 | 26.6 |
| 2020-11-17 12:40 | 27.5 |
| 2020-11-17 12:50 | 27.3 |
| 2020-11-17 13:00 | 27.4 |



|                  |      |
|------------------|------|
| 2020-11-17 13:10 | 28.3 |
| 2020-11-17 13:20 | 28.8 |
| 2020-11-17 13:30 | 29.2 |
| 2020-11-17 13:40 | 29.8 |
| 2020-11-17 13:50 | 27.9 |
| 2020-11-17 14:00 | 28.3 |
| 2020-11-17 14:10 | 28.6 |
| 2020-11-17 14:20 | 29.1 |
| 2020-11-17 14:30 | 29.6 |
| 2020-11-17 14:40 | 29.2 |
| 2020-11-17 14:50 | 29   |
| 2020-11-17 15:00 | 29.6 |
| 2020-11-17 15:10 | 29.4 |
| 2020-11-17 15:20 | 30.1 |
| 2020-11-17 15:30 | 29.1 |
| 2020-11-17 15:40 | 29.3 |
| 2020-11-17 15:50 | 28.7 |
| 2020-11-17 16:00 | 29.4 |
| 2020-11-17 16:10 | 29.6 |
| 2020-11-17 16:20 | 29.3 |
| 2020-11-17 16:30 | 28.6 |
| 2020-11-17 16:40 | 29.4 |
| 2020-11-17 16:50 | 28.4 |
| 2020-11-17 17:00 | 29   |
| 2020-11-17 17:10 | 27.6 |
| 2020-11-17 17:20 | 26.9 |
| 2020-11-17 17:30 | 26.3 |
| 2020-11-17 17:40 | 26.3 |
| 2020-11-17 17:50 | 25.6 |
| 2020-11-17 18:00 | 25   |
| 2020-11-17 18:10 | 24.8 |
| 2020-11-17 18:20 | 23.8 |
| 2020-11-17 18:30 | 23.1 |
| 2020-11-17 18:40 | 22.2 |
| 2020-11-17 18:50 | 21.8 |
| 2020-11-17 19:00 | 21.4 |
| 2020-11-17 19:10 | 21   |
| 2020-11-17 19:20 | 20.8 |
| 2020-11-17 19:30 | 20.4 |
| 2020-11-17 19:40 | 20.1 |
| 2020-11-17 19:50 | 19.8 |
| 2020-11-17 20:00 | 19.6 |
| 2020-11-17 20:10 | 19.2 |
| 2020-11-17 20:20 | 18.9 |
| 2020-11-17 20:30 | 18.6 |
| 2020-11-17 20:40 | 18.3 |
| 2020-11-17 20:50 | 17.9 |
| 2020-11-17 21:00 | 17.7 |
| 2020-11-17 21:10 | 17.4 |
| 2020-11-17 21:20 | 17.2 |



|                  |      |
|------------------|------|
| 2020-11-17 21:30 | 16.9 |
| 2020-11-17 21:40 | 16.8 |
| 2020-11-17 21:50 | 16.6 |
| 2020-11-17 22:00 | 16.4 |
| 2020-11-17 22:10 | 16.2 |
| 2020-11-17 22:20 | 16.1 |
| 2020-11-17 22:30 | 16   |
| 2020-11-17 22:40 | 15.8 |
| 2020-11-17 22:50 | 15.6 |
| 2020-11-17 23:00 | 15.4 |
| 2020-11-17 23:10 | 15.3 |
| 2020-11-17 23:20 | 15.1 |
| 2020-11-17 23:30 | 14.9 |
| 2020-11-17 23:40 | 14.8 |
| 2020-11-17 23:50 | 14.6 |
| 2020-11-18 00:00 | 14.5 |
| 2020-11-18 00:10 | 14.3 |
| 2020-11-18 00:20 | 14.1 |
| 2020-11-18 00:30 | 13.9 |
| 2020-11-18 00:40 | 13.8 |
| 2020-11-18 00:50 | 13.6 |
| 2020-11-18 01:00 | 13.6 |
| 2020-11-18 01:10 | 13.4 |
| 2020-11-18 01:20 | 13.4 |
| 2020-11-18 01:30 | 13.3 |
| 2020-11-18 01:40 | 13.1 |
| 2020-11-18 01:50 | 13.1 |
| 2020-11-18 02:00 | 13   |
| 2020-11-18 02:10 | 13.1 |
| 2020-11-18 02:20 | 12.9 |
| 2020-11-18 02:30 | 12.7 |
| 2020-11-18 02:40 | 12.8 |
| 2020-11-18 02:50 | 12.9 |
| 2020-11-18 03:00 | 12.9 |
| 2020-11-18 03:10 | 12.8 |
| 2020-11-18 03:20 | 12.8 |
| 2020-11-18 03:30 | 12.7 |
| 2020-11-18 03:40 | 12.6 |
| 2020-11-18 03:50 | 12.5 |
| 2020-11-18 04:00 | 12.6 |
| 2020-11-18 04:10 | 12.6 |
| 2020-11-18 04:20 | 12.6 |
| 2020-11-18 04:30 | 12.6 |
| 2020-11-18 04:40 | 12.4 |
| 2020-11-18 04:50 | 12.4 |
| 2020-11-18 05:00 | 12.4 |
| 2020-11-18 05:10 | 12.5 |
| 2020-11-18 05:20 | 12.5 |
| 2020-11-18 05:30 | 12.5 |
| 2020-11-18 05:40 | 12.6 |



|                  |      |
|------------------|------|
| 2020-11-18 05:50 | 12.6 |
| 2020-11-18 06:00 | 12.7 |
| 2020-11-18 06:10 | 12.7 |
| 2020-11-18 06:20 | 12.8 |
| 2020-11-18 06:30 | 12.9 |
| 2020-11-18 06:40 | 13   |
| 2020-11-18 06:50 | 13.4 |
| 2020-11-18 07:00 | 13.4 |
| 2020-11-18 07:10 | 13.6 |
| 2020-11-18 07:20 | 13.7 |
| 2020-11-18 07:30 | 13.9 |
| 2020-11-18 07:40 | 14.3 |
| 2020-11-18 07:50 | 14.8 |
| 2020-11-18 08:00 | 15.1 |
| 2020-11-18 08:10 | 15.6 |
| 2020-11-18 08:20 | 15.8 |
| 2020-11-18 08:30 | 16.4 |
| 2020-11-18 08:40 | 16.6 |
| 2020-11-18 08:50 | 16.8 |
| 2020-11-18 09:00 | 17.1 |
| 2020-11-18 09:10 | 17.6 |
| 2020-11-18 09:20 | 18.4 |
| 2020-11-18 09:30 | 19.5 |
| 2020-11-18 09:40 | 20.3 |
| 2020-11-18 09:50 | 21.2 |
| 2020-11-18 10:00 | 21.2 |
| 2020-11-18 10:10 | 20.9 |
| 2020-11-18 10:20 | 21.9 |
| 2020-11-18 10:30 | 22.1 |
| 2020-11-18 10:40 | 22.6 |
| 2020-11-18 10:50 | 22.3 |
| 2020-11-18 11:00 | 23.6 |
| 2020-11-18 11:10 | 23.5 |
| 2020-11-18 11:20 | 23.1 |
| 2020-11-18 11:30 | 23.6 |
| 2020-11-18 11:40 | 23.7 |
| 2020-11-18 11:50 | 22.8 |
| 2020-11-18 12:00 | 23   |
| 2020-11-18 12:10 | 22   |
| 2020-11-18 12:20 | 22.4 |
| 2020-11-18 12:30 | 22.4 |
| 2020-11-18 12:40 | 22.6 |
| 2020-11-18 12:50 | 23.3 |
| 2020-11-18 13:00 | 22.6 |
| 2020-11-18 13:10 | 22.3 |
| 2020-11-18 13:20 | 22.9 |
| 2020-11-18 13:30 | 22.9 |
| 2020-11-18 13:40 | 22.9 |
| 2020-11-18 13:50 | 22.5 |
| 2020-11-18 14:00 | 22.9 |



|                  |      |
|------------------|------|
| 2020-11-18 14:10 | 24.6 |
| 2020-11-18 14:20 | 24.1 |
| 2020-11-18 14:30 | 24.6 |
| 2020-11-18 14:40 | 24.3 |
| 2020-11-18 14:50 | 23.6 |
| 2020-11-18 15:00 | 23.3 |
| 2020-11-18 15:10 | 22.7 |
| 2020-11-18 15:20 | 22.8 |
| 2020-11-18 15:30 | 22.6 |
| 2020-11-18 15:40 | 22.4 |
| 2020-11-18 15:50 | 22.2 |
| 2020-11-18 16:00 | 22.2 |
| 2020-11-18 16:10 | 22.2 |
| 2020-11-18 16:20 | 21.9 |
| 2020-11-18 16:30 | 21.9 |
| 2020-11-18 16:40 | 21.8 |
| 2020-11-18 16:50 | 21.6 |
| 2020-11-18 17:00 | 21.4 |
| 2020-11-18 17:10 | 21.3 |
| 2020-11-18 17:20 | 20.9 |
| 2020-11-18 17:30 | 20.3 |
| 2020-11-18 17:50 | 19.8 |
| 2020-11-18 18:00 | 19.6 |
| 2020-11-18 18:10 | 19.4 |
| 2020-11-18 18:20 | 19.3 |
| 2020-11-18 18:30 | 19.1 |
| 2020-11-18 18:40 | 18.9 |
| 2020-11-18 18:50 | 18.8 |
| 2020-11-18 19:00 | 18.7 |
| 2020-11-18 19:10 | 18.6 |
| 2020-11-18 19:20 | 18.5 |
| 2020-11-18 19:30 | 18.5 |
| 2020-11-18 19:40 | 18.4 |
| 2020-11-18 19:50 | 18.2 |
| 2020-11-18 20:00 | 18.2 |
| 2020-11-18 20:10 | 18.2 |
| 2020-11-18 20:20 | 18.2 |
| 2020-11-18 20:30 | 18.1 |
| 2020-11-18 20:40 | 16.8 |
| 2020-11-18 20:50 | 16.3 |
| 2020-11-18 21:00 | 15.9 |
| 2020-11-18 21:10 | 15.9 |
| 2020-11-18 21:20 | 15.6 |
| 2020-11-18 21:30 | 15.5 |
| 2020-11-18 21:40 | 15.3 |
| 2020-11-18 21:50 | 15.3 |
| 2020-11-18 22:00 | 15.3 |
| 2020-11-18 22:10 | 15.1 |
| 2020-11-18 22:20 | 14.9 |
| 2020-11-18 22:30 | 14.8 |



|                  |      |
|------------------|------|
| 2020-11-18 22:40 | 14.8 |
| 2020-11-18 22:50 | 14.8 |
| 2020-11-18 23:00 | 14.6 |
| 2020-11-18 23:10 | 14.5 |
| 2020-11-18 23:20 | 14.4 |
| 2020-11-18 23:30 | 14.4 |
| 2020-11-18 23:40 | 14.3 |
| 2020-11-18 23:50 | 14.4 |
| 2020-11-19 00:00 | 14.3 |
| 2020-11-19 00:10 | 14.3 |
| 2020-11-19 00:20 | 14.3 |
| 2020-11-19 00:30 | 14.3 |
| 2020-11-19 00:40 | 14.3 |
| 2020-11-19 00:50 | 14.2 |
| 2020-11-19 01:00 | 14.3 |
| 2020-11-19 01:10 | 14.3 |
| 2020-11-19 01:20 | 14.2 |
| 2020-11-19 01:30 | 14.2 |
| 2020-11-19 01:40 | 14.1 |
| 2020-11-19 01:50 | 14.1 |
| 2020-11-19 02:00 | 14.1 |
| 2020-11-19 02:10 | 14.1 |
| 2020-11-19 02:20 | 14.1 |
| 2020-11-19 02:30 | 13.9 |
| 2020-11-19 02:40 | 14   |
| 2020-11-19 02:50 | 13.9 |
| 2020-11-19 03:00 | 13.9 |
| 2020-11-19 03:10 | 13.8 |
| 2020-11-19 03:20 | 13.4 |
| 2020-11-19 03:30 | 13.5 |
| 2020-11-19 03:40 | 13.4 |
| 2020-11-19 03:50 | 13.3 |
| 2020-11-19 04:00 | 13.2 |
| 2020-11-19 04:10 | 13.1 |
| 2020-11-19 04:20 | 12.9 |
| 2020-11-19 04:30 | 13.1 |
| 2020-11-19 04:40 | 13.1 |
| 2020-11-19 04:50 | 13.3 |
| 2020-11-19 05:00 | 13.1 |
| 2020-11-19 05:10 | 13.2 |
| 2020-11-19 05:20 | 13.1 |
| 2020-11-19 05:30 | 13.2 |
| 2020-11-19 05:40 | 13.3 |
| 2020-11-19 05:50 | 13.3 |
| 2020-11-19 06:00 | 13.6 |
| 2020-11-19 06:10 | 14.1 |
| 2020-11-19 06:20 | 14.5 |
| 2020-11-19 06:30 | 14.6 |
| 2020-11-19 06:40 | 14.3 |
| 2020-11-19 06:50 | 14.6 |



|                  |      |
|------------------|------|
| 2020-11-19 07:00 | 15.5 |
| 2020-11-19 07:10 | 16.3 |
| 2020-11-19 07:20 | 15.9 |
| 2020-11-19 07:30 | 15.9 |
| 2020-11-19 07:40 | 15.6 |
| 2020-11-19 07:50 | 16.1 |
| 2020-11-19 08:00 | 16.7 |
| 2020-11-19 08:10 | 18   |
| 2020-11-19 08:20 | 18.1 |
| 2020-11-19 08:30 | 18.1 |
| 2020-11-19 08:40 | 19.1 |
| 2020-11-19 08:50 | 19.3 |
| 2020-11-19 09:00 | 19.6 |
| 2020-11-19 09:10 | 20.4 |
| 2020-11-19 09:20 | 19.1 |
| 2020-11-19 09:30 | 20.1 |
| 2020-11-19 09:40 | 21.7 |
| 2020-11-19 09:50 | 21.4 |
| 2020-11-19 10:00 | 22.3 |
| 2020-11-19 10:10 | 20.4 |
| 2020-11-19 10:20 | 21.8 |
| 2020-11-19 10:30 | 20.1 |
| 2020-11-19 10:40 | 21.6 |
| 2020-11-19 10:50 | 20.5 |
| 2020-11-19 11:00 | 21   |
| 2020-11-19 11:10 | 22.4 |
| 2020-11-19 11:20 | 23.5 |
| 2020-11-19 11:30 | 24.1 |
| 2020-11-19 11:40 | 24.8 |
| 2020-11-19 11:50 | 23.9 |
| 2020-11-19 12:00 | 25.1 |
| 2020-11-19 12:10 | 23.8 |
| 2020-11-19 12:20 | 25.1 |
| 2020-11-19 12:30 | 24.4 |
| 2020-11-19 12:40 | 26.4 |
| 2020-11-19 12:50 | 25.9 |
| 2020-11-19 13:00 | 24.1 |
| 2020-11-19 13:10 | 26.1 |
| 2020-11-19 13:20 | 26.3 |
| 2020-11-19 13:30 | 25.5 |
| 2020-11-19 13:40 | 24.6 |
| 2020-11-19 13:50 | 26.2 |
| 2020-11-19 14:00 | 27   |
| 2020-11-19 14:10 | 27.4 |
| 2020-11-19 14:20 | 27.6 |
| 2020-11-19 14:30 | 26   |
| 2020-11-19 14:40 | 26.2 |
| 2020-11-19 14:50 | 26.7 |
| 2020-11-19 15:00 | 26.2 |
| 2020-11-19 15:10 | 26.6 |



|                  |      |
|------------------|------|
| 2020-11-19 15:20 | 25.1 |
| 2020-11-19 15:30 | 25.3 |
| 2020-11-19 15:40 | 26.4 |
| 2020-11-19 15:50 | 25.4 |
| 2020-11-19 16:00 | 26.4 |
| 2020-11-19 16:10 | 27.1 |
| 2020-11-19 16:20 | 25.9 |
| 2020-11-19 16:30 | 26.4 |
| 2020-11-19 16:40 | 26.8 |
| 2020-11-19 16:50 | 26.6 |
| 2020-11-19 17:00 | 26.4 |
| 2020-11-19 17:10 | 26.2 |
| 2020-11-19 17:20 | 25.9 |
| 2020-11-19 17:30 | 25.3 |
| 2020-11-19 17:40 | 24.9 |
| 2020-11-19 17:50 | 24.6 |
| 2020-11-19 18:00 | 23.6 |
| 2020-11-19 18:10 | 23.3 |
| 2020-11-19 18:20 | 23.3 |
| 2020-11-19 18:30 | 22.8 |
| 2020-11-19 18:40 | 22.1 |
| 2020-11-19 18:50 | 21.6 |
| 2020-11-19 19:00 | 21.3 |
| 2020-11-19 19:10 | 20.8 |
| 2020-11-19 19:20 | 20.4 |
| 2020-11-19 19:30 | 20.1 |
| 2020-11-19 19:40 | 19.8 |
| 2020-11-19 19:50 | 19.4 |
| 2020-11-19 20:00 | 19.3 |
| 2020-11-19 20:10 | 19   |
| 2020-11-19 20:20 | 18.8 |
| 2020-11-19 20:30 | 18.5 |
| 2020-11-19 20:40 | 18.3 |
| 2020-11-19 20:50 | 18   |
| 2020-11-19 21:00 | 17.9 |
| 2020-11-19 21:10 | 17.7 |
| 2020-11-19 21:20 | 17.4 |
| 2020-11-19 21:30 | 17.3 |
| 2020-11-19 21:40 | 17.1 |
| 2020-11-19 21:50 | 16.9 |
| 2020-11-19 22:00 | 16.7 |
| 2020-11-19 22:10 | 16.5 |
| 2020-11-19 22:30 | 16.3 |
| 2020-11-19 22:40 | 16   |
| 2020-11-19 22:50 | 15.9 |
| 2020-11-19 23:00 | 15.8 |
| 2020-11-19 23:10 | 15.7 |
| 2020-11-19 23:20 | 15.6 |
| 2020-11-19 23:30 | 15.4 |
| 2020-11-19 23:40 | 15.3 |



|                  |      |
|------------------|------|
| 2020-11-19 23:50 | 15.3 |
| 2020-11-20 00:00 | 15.1 |
| 2020-11-20 00:10 | 14.9 |
| 2020-11-20 00:20 | 14.8 |
| 2020-11-20 00:30 | 14.7 |
| 2020-11-20 00:40 | 14.6 |
| 2020-11-20 00:50 | 14.4 |
| 2020-11-20 01:00 | 14.1 |
| 2020-11-20 01:10 | 14   |
| 2020-11-20 01:20 | 13.8 |
| 2020-11-20 01:30 | 13.8 |
| 2020-11-20 01:40 | 13.7 |
| 2020-11-20 01:50 | 13.4 |
| 2020-11-20 02:00 | 13.3 |
| 2020-11-20 02:10 | 13.3 |
| 2020-11-20 02:20 | 13.1 |
| 2020-11-20 02:30 | 12.9 |
| 2020-11-20 02:40 | 12.8 |
| 2020-11-20 02:50 | 12.6 |
| 2020-11-20 03:00 | 12.4 |
| 2020-11-20 03:10 | 12.2 |
| 2020-11-20 03:20 | 12.3 |
| 2020-11-20 03:30 | 12.4 |
| 2020-11-20 03:40 | 12.3 |
| 2020-11-20 03:50 | 12.4 |
| 2020-11-20 04:00 | 12.3 |
| 2020-11-20 04:10 | 12.3 |
| 2020-11-20 04:20 | 12.2 |
| 2020-11-20 04:30 | 12.1 |
| 2020-11-20 04:40 | 12.1 |
| 2020-11-20 04:50 | 12.1 |
| 2020-11-20 05:00 | 11.9 |
| 2020-11-20 05:10 | 12   |
| 2020-11-20 05:20 | 11.9 |
| 2020-11-20 05:30 | 11.9 |
| 2020-11-20 05:40 | 11.9 |
| 2020-11-20 05:50 | 12   |
| 2020-11-20 06:00 | 12.4 |
| 2020-11-20 06:10 | 13.4 |
| 2020-11-20 06:20 | 14.2 |
| 2020-11-20 06:30 | 14.3 |
| 2020-11-20 06:40 | 14.5 |
| 2020-11-20 06:50 | 14.8 |
| 2020-11-20 07:00 | 15.4 |
| 2020-11-20 07:10 | 15.4 |
| 2020-11-20 07:20 | 16.1 |
| 2020-11-20 07:30 | 16.6 |
| 2020-11-20 07:40 | 17.3 |
| 2020-11-20 07:50 | 17.5 |
| 2020-11-20 08:00 | 18.1 |



|                  |      |
|------------------|------|
| 2020-11-20 08:10 | 18.2 |
| 2020-11-20 08:20 | 18.9 |
| 2020-11-20 08:30 | 19.4 |
| 2020-11-20 08:40 | 19.8 |
| 2020-11-20 08:50 | 20.3 |
| 2020-11-20 09:00 | 20.9 |
| 2020-11-20 09:10 | 20.6 |
| 2020-11-20 09:20 | 21.5 |
| 2020-11-20 09:30 | 22.8 |
| 2020-11-20 09:40 | 22.8 |
| 2020-11-20 09:50 | 22.6 |
| 2020-11-20 10:00 | 22.9 |
| 2020-11-20 10:10 | 23.4 |
| 2020-11-20 10:20 | 24.4 |
| 2020-11-20 10:30 | 24.4 |
| 2020-11-20 10:40 | 25.9 |
| 2020-11-20 10:50 | 26.9 |
| 2020-11-20 11:00 | 26.1 |
| 2020-11-20 11:10 | 25.6 |
| 2020-11-20 11:20 | 24.5 |
| 2020-11-20 11:30 | 24.4 |
| 2020-11-20 11:40 | 26   |
| 2020-11-20 11:50 | 26.8 |
| 2020-11-20 12:00 | 26.9 |
| 2020-11-20 12:10 | 28.3 |
| 2020-11-20 12:20 | 28.4 |
| 2020-11-20 12:30 | 26.3 |
| 2020-11-20 12:40 | 26.2 |
| 2020-11-20 12:50 | 25.4 |
| 2020-11-20 13:00 | 27.1 |
| 2020-11-20 13:10 | 27.5 |
| 2020-11-20 13:20 | 27.8 |
| 2020-11-20 13:30 | 25.1 |
| 2020-11-20 13:40 | 25.4 |
| 2020-11-20 13:50 | 27   |
| 2020-11-20 14:00 | 27.9 |
| 2020-11-20 14:10 | 29.7 |
| 2020-11-20 14:20 | 25.8 |
| 2020-11-20 14:30 | 25.8 |
| 2020-11-20 14:40 | 24.1 |
| 2020-11-20 14:50 | 23.6 |
| 2020-11-20 15:00 | 26.6 |
| 2020-11-20 15:10 | 26.4 |
| 2020-11-20 15:20 | 26.9 |
| 2020-11-20 15:30 | 24.8 |
| 2020-11-20 15:40 | 23.9 |
| 2020-11-20 15:50 | 23.4 |
| 2020-11-20 16:00 | 22.9 |
| 2020-11-20 16:10 | 23.3 |
| 2020-11-20 16:20 | 23.6 |



|                  |      |
|------------------|------|
| 2020-11-20 16:30 | 24.4 |
| 2020-11-20 16:40 | 25.7 |
| 2020-11-20 16:50 | 24.3 |
| 2020-11-20 17:00 | 24.9 |
| 2020-11-20 17:10 | 25   |
| 2020-11-20 17:20 | 24.8 |
| 2020-11-20 17:30 | 24.4 |
| 2020-11-20 17:40 | 23.3 |
| 2020-11-20 17:50 | 22.7 |
| 2020-11-20 18:00 | 22.3 |
| 2020-11-20 18:10 | 21.9 |
| 2020-11-20 18:20 | 21.6 |
| 2020-11-20 18:30 | 21.8 |
| 2020-11-20 18:40 | 21.3 |
| 2020-11-20 18:50 | 20.8 |
| 2020-11-20 19:00 | 20.3 |
| 2020-11-20 19:10 | 19.7 |
| 2020-11-20 19:20 | 19.3 |
| 2020-11-20 19:30 | 19   |
| 2020-11-20 19:40 | 18.8 |
| 2020-11-20 19:50 | 18.8 |
| 2020-11-20 20:00 | 18.5 |
| 2020-11-20 20:10 | 18.4 |
| 2020-11-20 20:20 | 18.3 |
| 2020-11-20 20:30 | 18   |
| 2020-11-20 20:40 | 17.6 |
| 2020-11-20 20:50 | 17.2 |
| 2020-11-20 21:00 | 17   |
| 2020-11-20 21:10 | 16.8 |
| 2020-11-20 21:20 | 16.7 |
| 2020-11-20 21:30 | 16.4 |
| 2020-11-20 21:40 | 16.3 |
| 2020-11-20 21:50 | 16.1 |
| 2020-11-20 22:00 | 15.9 |
| 2020-11-20 22:10 | 15.8 |
| 2020-11-20 22:20 | 15.7 |
| 2020-11-20 22:30 | 15.6 |
| 2020-11-20 22:40 | 15.4 |
| 2020-11-20 22:50 | 15.2 |
| 2020-11-20 23:00 | 15.1 |
| 2020-11-20 23:10 | 15   |
| 2020-11-20 23:20 | 15.1 |
| 2020-11-20 23:30 | 15   |
| 2020-11-20 23:40 | 14.9 |
| 2020-11-20 23:50 | 14.9 |
| 2020-11-21 00:00 | 14.8 |
| 2020-11-21 00:10 | 14.6 |
| 2020-11-21 00:20 | 14.4 |
| 2020-11-21 00:30 | 14.3 |
| 2020-11-21 00:40 | 14.2 |



|                  |      |
|------------------|------|
| 2020-11-21 00:50 | 14.1 |
| 2020-11-21 01:00 | 14.1 |
| 2020-11-21 01:10 | 14.3 |
| 2020-11-21 01:20 | 14.2 |
| 2020-11-21 01:30 | 14.1 |
| 2020-11-21 01:40 | 14.1 |
| 2020-11-21 01:50 | 14.2 |
| 2020-11-21 02:00 | 14.1 |
| 2020-11-21 02:10 | 14   |
| 2020-11-21 02:20 | 14   |
| 2020-11-21 02:30 | 14   |
| 2020-11-21 02:40 | 13.9 |
| 2020-11-21 02:50 | 13.9 |
| 2020-11-21 03:00 | 13.8 |
| 2020-11-21 03:10 | 13.6 |
| 2020-11-21 03:20 | 13.5 |
| 2020-11-21 03:30 | 13.3 |
| 2020-11-21 03:40 | 13.2 |
| 2020-11-21 03:50 | 13.2 |
| 2020-11-21 04:00 | 13.1 |
| 2020-11-21 04:10 | 12.9 |
| 2020-11-21 04:20 | 12.8 |
| 2020-11-21 04:30 | 12.7 |
| 2020-11-21 04:40 | 12.6 |
| 2020-11-21 04:50 | 12.6 |
| 2020-11-21 05:00 | 12.5 |
| 2020-11-21 05:10 | 12.4 |
| 2020-11-21 05:20 | 12.4 |
| 2020-11-21 05:30 | 12.4 |
| 2020-11-21 05:40 | 12.6 |
| 2020-11-21 05:50 | 12.6 |
| 2020-11-21 06:00 | 13.1 |
| 2020-11-21 06:10 | 14   |
| 2020-11-21 06:20 | 14.6 |
| 2020-11-21 06:30 | 15.3 |
| 2020-11-21 06:40 | 15.3 |
| 2020-11-21 06:50 | 15.8 |
| 2020-11-21 07:00 | 16.1 |
| 2020-11-21 07:10 | 16.6 |
| 2020-11-21 07:20 | 17.3 |
| 2020-11-21 07:30 | 17.6 |
| 2020-11-21 07:40 | 17.8 |
| 2020-11-21 07:50 | 17.6 |
| 2020-11-21 08:00 | 18.4 |
| 2020-11-21 08:10 | 19.1 |
| 2020-11-21 08:20 | 19.4 |
| 2020-11-21 08:30 | 19.8 |
| 2020-11-21 08:40 | 20.3 |
| 2020-11-21 08:50 | 21.4 |
| 2020-11-21 09:00 | 21.5 |



|                  |      |
|------------------|------|
| 2020-11-21 09:10 | 22.4 |
| 2020-11-21 09:20 | 23   |
| 2020-11-21 09:30 | 23.6 |
| 2020-11-21 09:40 | 22.6 |
| 2020-11-21 09:50 | 22.6 |
| 2020-11-21 10:00 | 24.1 |
| 2020-11-21 10:10 | 24   |
| 2020-11-21 10:20 | 25.3 |
| 2020-11-21 10:30 | 24.9 |
| 2020-11-21 10:40 | 25.8 |
| 2020-11-21 10:50 | 26.4 |
| 2020-11-21 11:00 | 26.2 |
| 2020-11-21 11:10 | 28.8 |
| 2020-11-21 11:20 | 27.3 |
| 2020-11-21 11:30 | 27.8 |
| 2020-11-21 11:40 | 27.1 |
| 2020-11-21 11:50 | 25.6 |
| 2020-11-21 12:00 | 25.6 |
| 2020-11-21 12:10 | 28.3 |
| 2020-11-21 12:20 | 26.1 |
| 2020-11-21 12:30 | 25.2 |
| 2020-11-21 12:50 | 26.6 |
| 2020-11-21 13:10 | 29.6 |
| 2020-11-21 13:20 | 30.7 |
| 2020-11-21 13:30 | 30   |
| 2020-11-21 13:40 | 30.3 |
| 2020-11-21 13:50 | 27.4 |
| 2020-11-21 14:00 | 29.9 |
| 2020-11-21 14:10 | 28.2 |
| 2020-11-21 14:20 | 27.8 |
| 2020-11-21 14:30 | 29.4 |
| 2020-11-21 14:40 | 31.6 |
| 2020-11-21 14:50 | 30.8 |
| 2020-11-21 15:00 | 29.8 |
| 2020-11-21 15:10 | 27.8 |
| 2020-11-21 15:20 | 30.9 |
| 2020-11-21 15:30 | 30.9 |
| 2020-11-21 15:40 | 31.7 |
| 2020-11-21 15:50 | 31.8 |
| 2020-11-21 16:00 | 30.6 |
| 2020-11-21 16:10 | 30.5 |
| 2020-11-21 16:20 | 29.9 |
| 2020-11-21 16:30 | 29.2 |
| 2020-11-21 16:40 | 27.4 |
| 2020-11-21 16:50 | 28   |
| 2020-11-21 17:00 | 29.8 |
| 2020-11-21 17:10 | 29.9 |
| 2020-11-21 17:20 | 29.7 |
| 2020-11-21 17:30 | 30.6 |
| 2020-11-21 17:40 | 30   |



|                  |      |
|------------------|------|
| 2020-11-21 17:50 | 28.6 |
| 2020-11-21 18:00 | 27.8 |
| 2020-11-21 18:10 | 26.8 |
| 2020-11-21 18:20 | 27.3 |
| 2020-11-21 18:30 | 27   |
| 2020-11-21 18:40 | 26.3 |
| 2020-11-21 18:50 | 25.4 |
| 2020-11-21 19:10 | 24.6 |
| 2020-11-21 19:20 | 24.3 |
| 2020-11-21 19:30 | 23.9 |
| 2020-11-21 19:40 | 23.6 |
| 2020-11-21 19:50 | 23.3 |
| 2020-11-21 20:00 | 23.1 |
| 2020-11-21 20:10 | 22.9 |
| 2020-11-21 20:20 | 22.5 |
| 2020-11-21 20:30 | 22   |
| 2020-11-21 20:40 | 21.6 |
| 2020-11-21 20:50 | 21.6 |
| 2020-11-21 21:00 | 20.9 |
| 2020-11-21 21:10 | 20.4 |
| 2020-11-21 21:30 | 19.8 |
| 2020-11-21 21:40 | 19.6 |
| 2020-11-21 21:50 | 19.4 |
| 2020-11-21 22:00 | 19.2 |
| 2020-11-21 22:10 | 19.1 |
| 2020-11-21 22:20 | 18.8 |
| 2020-11-21 22:30 | 18.7 |
| 2020-11-21 22:40 | 18.6 |
| 2020-11-21 22:50 | 18.3 |
| 2020-11-21 23:00 | 18.1 |
| 2020-11-21 23:10 | 17.9 |
| 2020-11-21 23:20 | 17.8 |
| 2020-11-21 23:30 | 17.5 |
| 2020-11-21 23:40 | 17.4 |
| 2020-11-21 23:50 | 17.2 |
| 2020-11-22 00:00 | 17.1 |
| 2020-11-22 00:10 | 16.8 |
| 2020-11-22 00:20 | 16.8 |
| 2020-11-22 00:30 | 16.5 |
| 2020-11-22 00:40 | 16.3 |
| 2020-11-22 00:50 | 16.1 |
| 2020-11-22 01:00 | 15.9 |
| 2020-11-22 01:10 | 15.8 |
| 2020-11-22 01:20 | 15.7 |
| 2020-11-22 01:30 | 15.4 |
| 2020-11-22 01:40 | 15.3 |
| 2020-11-22 01:50 | 15.1 |
| 2020-11-22 02:00 | 15   |
| 2020-11-22 02:10 | 14.9 |
| 2020-11-22 02:20 | 14.9 |



|                  |      |
|------------------|------|
| 2020-11-22 02:30 | 14.8 |
| 2020-11-22 02:40 | 14.7 |
| 2020-11-22 02:50 | 14.6 |
| 2020-11-22 03:00 | 14.4 |
| 2020-11-22 03:10 | 14.3 |
| 2020-11-22 03:20 | 14.3 |
| 2020-11-22 03:30 | 14.2 |
| 2020-11-22 03:40 | 14.1 |
| 2020-11-22 03:50 | 14.1 |
| 2020-11-22 04:00 | 14   |
| 2020-11-22 04:10 | 14.1 |
| 2020-11-22 04:20 | 14.1 |
| 2020-11-22 04:30 | 14.1 |
| 2020-11-22 04:40 | 14.1 |
| 2020-11-22 04:50 | 13.9 |
| 2020-11-22 05:00 | 13.9 |
| 2020-11-22 05:10 | 13.8 |
| 2020-11-22 05:20 | 13.8 |
| 2020-11-22 05:30 | 13.8 |
| 2020-11-22 05:40 | 13.9 |
| 2020-11-22 05:50 | 14   |
| 2020-11-22 06:00 | 14.4 |
| 2020-11-22 06:10 | 15.3 |
| 2020-11-22 06:20 | 15.9 |
| 2020-11-22 06:30 | 16.4 |
| 2020-11-22 06:40 | 16.9 |
| 2020-11-22 06:50 | 17.4 |
| 2020-11-22 07:00 | 17.9 |
| 2020-11-22 07:10 | 18.4 |
| 2020-11-22 07:20 | 19.1 |
| 2020-11-22 07:30 | 19.7 |
| 2020-11-22 07:40 | 19.4 |
| 2020-11-22 07:50 | 19.4 |
| 2020-11-22 08:00 | 20.1 |
| 2020-11-22 08:10 | 20.3 |
| 2020-11-22 08:20 | 20.9 |
| 2020-11-22 08:30 | 21.6 |
| 2020-11-22 08:40 | 21.7 |
| 2020-11-22 08:50 | 22.4 |
| 2020-11-22 09:00 | 22   |
| 2020-11-22 09:10 | 22.9 |
| 2020-11-22 09:20 | 23.3 |
| 2020-11-22 09:30 | 23.6 |
| 2020-11-22 09:40 | 24.2 |
| 2020-11-22 09:50 | 25.3 |
| 2020-11-22 10:00 | 25.3 |
| 2020-11-22 10:10 | 26   |
| 2020-11-22 10:20 | 26.1 |
| 2020-11-22 10:30 | 26.6 |
| 2020-11-22 10:40 | 27.7 |



|                  |      |
|------------------|------|
| 2020-11-22 10:50 | 27.6 |
| 2020-11-22 11:00 | 28.4 |
| 2020-11-22 11:10 | 28.8 |
| 2020-11-22 11:20 | 28.8 |
| 2020-11-22 11:30 | 27.8 |
| 2020-11-22 11:40 | 28.8 |
| 2020-11-22 11:50 | 29.3 |
| 2020-11-22 12:00 | 30.7 |
| 2020-11-22 12:10 | 29.6 |
| 2020-11-22 12:20 | 29.6 |
| 2020-11-22 12:30 | 30.6 |
| 2020-11-22 12:40 | 30.1 |
| 2020-11-22 12:50 | 29.6 |
| 2020-11-22 13:00 | 31.1 |
| 2020-11-22 13:10 | 32.8 |
| 2020-11-22 13:20 | 33.5 |
| 2020-11-22 13:30 | 29.3 |
| 2020-11-22 13:40 | 30.8 |
| 2020-11-22 13:50 | 31.6 |
| 2020-11-22 14:00 | 31.3 |
| 2020-11-22 14:10 | 31.9 |
| 2020-11-22 14:20 | 33.7 |
| 2020-11-22 14:30 | 32.4 |
| 2020-11-22 14:40 | 31.2 |
| 2020-11-22 14:50 | 29.4 |
| 2020-11-22 15:00 | 28.8 |
| 2020-11-22 15:10 | 29.1 |
| 2020-11-22 15:20 | 29.7 |
| 2020-11-22 15:30 | 29.7 |
| 2020-11-22 15:40 | 28.8 |
| 2020-11-22 15:50 | 29.1 |
| 2020-11-22 16:00 | 31.1 |
| 2020-11-22 16:10 | 31.9 |
| 2020-11-22 16:20 | 30   |
| 2020-11-22 16:30 | 29.7 |
| 2020-11-22 16:40 | 28.5 |
| 2020-11-22 16:50 | 28.2 |
| 2020-11-22 17:00 | 27.8 |
| 2020-11-22 17:10 | 29.3 |
| 2020-11-22 17:20 | 31.6 |
| 2020-11-22 17:30 | 32.8 |
| 2020-11-22 17:40 | 32.4 |
| 2020-11-22 17:50 | 31.7 |
| 2020-11-22 18:00 | 31.4 |
| 2020-11-22 18:10 | 30.1 |
| 2020-11-22 18:20 | 29.4 |
| 2020-11-22 18:30 | 28.4 |
| 2020-11-22 18:40 | 27.4 |
| 2020-11-22 18:50 | 26.7 |
| 2020-11-22 19:00 | 26.2 |



|                  |      |
|------------------|------|
| 2020-11-22 19:10 | 25.9 |
| 2020-11-22 19:20 | 25.3 |
| 2020-11-22 19:30 | 25.3 |
| 2020-11-22 19:40 | 24.7 |
| 2020-11-22 19:50 | 24.1 |
| 2020-11-22 20:00 | 23.7 |
| 2020-11-22 20:10 | 23.6 |
| 2020-11-22 20:20 | 23.3 |
| 2020-11-22 20:30 | 23.1 |
| 2020-11-22 20:40 | 22.9 |
| 2020-11-22 20:50 | 22.8 |
| 2020-11-22 21:00 | 22.7 |
| 2020-11-22 21:10 | 22.6 |
| 2020-11-22 21:20 | 22.3 |
| 2020-11-22 21:30 | 21.8 |
| 2020-11-22 21:40 | 21.6 |
| 2020-11-22 21:50 | 21.4 |
| 2020-11-22 22:00 | 21.3 |
| 2020-11-22 22:10 | 21.2 |
| 2020-11-22 22:20 | 20.8 |
| 2020-11-22 22:30 | 20.6 |
| 2020-11-22 22:40 | 20.4 |
| 2020-11-22 22:50 | 20.2 |
| 2020-11-22 23:00 | 20   |
| 2020-11-22 23:10 | 19.7 |
| 2020-11-22 23:20 | 19.6 |
| 2020-11-22 23:30 | 19.6 |
| 2020-11-22 23:40 | 19.4 |
| 2020-11-22 23:50 | 19.3 |
| 2020-11-23 00:00 | 19.3 |
| 2020-11-23 00:10 | 19.1 |
| 2020-11-23 00:20 | 19.1 |
| 2020-11-23 00:30 | 18.9 |
| 2020-11-23 00:40 | 18.7 |
| 2020-11-23 00:50 | 18.6 |
| 2020-11-23 01:10 | 18.3 |
| 2020-11-23 01:20 | 18.1 |
| 2020-11-23 01:30 | 18.1 |
| 2020-11-23 01:40 | 17.9 |
| 2020-11-23 01:50 | 17.8 |
| 2020-11-23 02:00 | 17.6 |
| 2020-11-23 02:10 | 17.5 |
| 2020-11-23 02:20 | 17.3 |
| 2020-11-23 02:30 | 17.3 |
| 2020-11-23 02:40 | 17.1 |
| 2020-11-23 02:50 | 17   |
| 2020-11-23 03:00 | 16.9 |
| 2020-11-23 03:10 | 16.9 |
| 2020-11-23 03:20 | 16.8 |
| 2020-11-23 03:30 | 16.7 |



|                  |      |
|------------------|------|
| 2020-11-23 03:40 | 16.6 |
| 2020-11-23 03:50 | 16.6 |
| 2020-11-23 04:00 | 16.5 |
| 2020-11-23 04:10 | 16.5 |
| 2020-11-23 04:20 | 16.4 |
| 2020-11-23 04:30 | 16.4 |
| 2020-11-23 04:40 | 16.4 |
| 2020-11-23 04:50 | 16.3 |
| 2020-11-23 05:00 | 16.1 |
| 2020-11-23 05:10 | 16   |
| 2020-11-23 05:20 | 15.9 |
| 2020-11-23 05:30 | 15.8 |
| 2020-11-23 05:40 | 15.8 |
| 2020-11-23 05:50 | 15.8 |
| 2020-11-23 06:00 | 16.3 |
| 2020-11-23 06:10 | 16.9 |
| 2020-11-23 06:20 | 17.4 |
| 2020-11-23 06:30 | 17.9 |
| 2020-11-23 06:40 | 18.5 |
| 2020-11-23 06:50 | 19   |
| 2020-11-23 07:00 | 19.6 |
| 2020-11-23 07:10 | 19.9 |
| 2020-11-23 07:20 | 20   |
| 2020-11-23 07:30 | 20.1 |
| 2020-11-23 07:40 | 20.8 |
| 2020-11-23 07:50 | 20.7 |
| 2020-11-23 08:00 | 21.3 |
| 2020-11-23 08:10 | 21.4 |
| 2020-11-23 08:20 | 22.1 |
| 2020-11-23 08:30 | 22.8 |
| 2020-11-23 08:40 | 22.2 |
| 2020-11-23 08:50 | 22.8 |
| 2020-11-23 09:00 | 23.6 |
| 2020-11-23 09:10 | 23.7 |
| 2020-11-23 09:20 | 24.3 |
| 2020-11-23 09:30 | 24.6 |
| 2020-11-23 09:40 | 24.9 |
| 2020-11-23 09:50 | 26   |
| 2020-11-23 10:00 | 25.9 |
| 2020-11-23 10:10 | 25.8 |
| 2020-11-23 10:20 | 26.3 |
| 2020-11-23 10:30 | 27.1 |
| 2020-11-23 10:40 | 27.6 |
| 2020-11-23 10:50 | 27.3 |
| 2020-11-23 11:00 | 27.9 |
| 2020-11-23 11:10 | 28.8 |
| 2020-11-23 11:20 | 29.3 |
| 2020-11-23 11:30 | 29.6 |
| 2020-11-23 11:40 | 29.8 |
| 2020-11-23 11:50 | 29.1 |



|                  |      |
|------------------|------|
| 2020-11-23 12:00 | 30.3 |
| 2020-11-23 12:10 | 30.1 |
| 2020-11-23 12:20 | 31.3 |
| 2020-11-23 12:30 | 31.8 |
| 2020-11-23 12:40 | 32.4 |
| 2020-11-23 12:50 | 32.3 |
| 2020-11-23 13:00 | 31.9 |
| 2020-11-23 13:10 | 32.9 |
| 2020-11-23 13:20 | 32.8 |
| 2020-11-23 13:30 | 32.6 |
| 2020-11-23 13:40 | 30.1 |
| 2020-11-23 13:50 | 32.4 |
| 2020-11-23 14:00 | 33.1 |
| 2020-11-23 14:10 | 31.6 |
| 2020-11-23 14:20 | 32.7 |
| 2020-11-23 14:30 | 33.3 |
| 2020-11-23 14:40 | 32.9 |
| 2020-11-23 14:50 | 34.3 |
| 2020-11-23 15:00 | 34   |
| 2020-11-23 15:10 | 32.8 |
| 2020-11-23 15:20 | 34.1 |
| 2020-11-23 15:30 | 31   |
| 2020-11-23 15:40 | 32.3 |
| 2020-11-23 15:50 | 33.3 |
| 2020-11-23 16:00 | 32.9 |
| 2020-11-23 16:10 | 33.6 |
| 2020-11-23 16:20 | 33.1 |
| 2020-11-23 16:30 | 34.2 |
| 2020-11-23 16:40 | 33.1 |
| 2020-11-23 16:50 | 33.1 |
| 2020-11-23 17:00 | 33.9 |
| 2020-11-23 17:10 | 33.3 |
| 2020-11-23 17:20 | 32.6 |
| 2020-11-23 17:30 | 32.4 |
| 2020-11-23 17:40 | 32.4 |
| 2020-11-23 17:50 | 32.7 |
| 2020-11-23 18:00 | 31.6 |
| 2020-11-23 18:10 | 31.5 |
| 2020-11-23 18:20 | 30.3 |
| 2020-11-23 18:30 | 29.7 |
| 2020-11-23 18:40 | 28.8 |
| 2020-11-23 18:50 | 28.1 |
| 2020-11-23 19:00 | 27.6 |
| 2020-11-23 19:10 | 27.3 |
| 2020-11-23 19:20 | 26.7 |
| 2020-11-23 19:30 | 26.2 |
| 2020-11-23 19:40 | 26.1 |
| 2020-11-23 19:50 | 25.8 |
| 2020-11-23 20:00 | 25.3 |
| 2020-11-23 20:10 | 25.3 |



|                  |      |
|------------------|------|
| 2020-11-23 20:20 | 25.3 |
| 2020-11-23 20:30 | 24.9 |
| 2020-11-23 20:40 | 24.7 |
| 2020-11-23 20:50 | 24.4 |
| 2020-11-23 21:00 | 23.9 |
| 2020-11-23 21:10 | 23.7 |
| 2020-11-23 21:20 | 23.9 |
| 2020-11-23 21:30 | 23.8 |
| 2020-11-23 21:40 | 23.5 |
| 2020-11-23 21:50 | 22.9 |
| 2020-11-23 22:00 | 22.4 |
| 2020-11-23 22:10 | 22.3 |
| 2020-11-23 22:20 | 22.4 |
| 2020-11-23 22:30 | 22.6 |
| 2020-11-23 22:40 | 22.3 |
| 2020-11-23 22:50 | 22.4 |
| 2020-11-23 23:00 | 21.9 |
| 2020-11-23 23:10 | 21.9 |
| 2020-11-23 23:20 | 21.8 |
| 2020-11-23 23:30 | 21.6 |
| 2020-11-23 23:40 | 21.4 |
| 2020-11-23 23:50 | 21.3 |
| 2020-11-24 00:00 | 21.1 |
| 2020-11-24 00:10 | 20.9 |
| 2020-11-24 00:20 | 20.8 |
| 2020-11-24 00:30 | 20.6 |
| 2020-11-24 00:40 | 20.2 |
| 2020-11-24 00:50 | 20   |
| 2020-11-24 01:00 | 19.8 |
| 2020-11-24 01:10 | 19.6 |
| 2020-11-24 01:20 | 19.3 |
| 2020-11-24 01:30 | 19.2 |
| 2020-11-24 01:40 | 18.9 |
| 2020-11-24 01:50 | 19.1 |
| 2020-11-24 02:00 | 19   |
| 2020-11-24 02:10 | 19.1 |
| 2020-11-24 02:20 | 18.9 |
| 2020-11-24 02:30 | 18.6 |
| 2020-11-24 02:40 | 18.4 |
| 2020-11-24 02:50 | 18.5 |
| 2020-11-24 03:00 | 18.6 |
| 2020-11-24 03:00 | 18.6 |
| 2020-11-24 03:10 | 18.4 |
| 2020-11-24 03:20 | 18.1 |
| 2020-11-24 03:30 | 17.8 |
| 2020-11-24 03:40 | 17.8 |
| 2020-11-24 03:50 | 17.5 |
| 2020-11-24 04:00 | 17.3 |
| 2020-11-24 04:10 | 17.2 |
| 2020-11-24 04:20 | 16.9 |



|                  |      |
|------------------|------|
| 2020-11-24 04:30 | 16.8 |
| 2020-11-24 04:40 | 16.6 |
| 2020-11-24 04:50 | 16.4 |
| 2020-11-24 05:00 | 16.3 |
| 2020-11-24 05:10 | 16.1 |
| 2020-11-24 05:20 | 16   |
| 2020-11-24 05:30 | 15.9 |
| 2020-11-24 05:40 | 15.9 |
| 2020-11-24 05:50 | 15.9 |
| 2020-11-24 06:00 | 16.5 |
| 2020-11-24 06:10 | 17.3 |
| 2020-11-24 06:20 | 17.9 |
| 2020-11-24 06:30 | 18.6 |
| 2020-11-24 06:40 | 18.6 |
| 2020-11-24 06:50 | 18.8 |
| 2020-11-24 07:00 | 18.9 |
| 2020-11-24 07:10 | 19.3 |
| 2020-11-24 07:20 | 19.7 |
| 2020-11-24 07:30 | 20   |
| 2020-11-24 07:40 | 20.4 |
| 2020-11-24 07:50 | 20.5 |
| 2020-11-24 08:00 | 20.7 |
| 2020-11-24 08:10 | 21.4 |
| 2020-11-24 08:20 | 21.8 |
| 2020-11-24 08:30 | 21.9 |
| 2020-11-24 08:40 | 22.2 |
| 2020-11-24 08:50 | 22.3 |
| 2020-11-24 09:00 | 22.8 |
| 2020-11-24 09:10 | 23.3 |
| 2020-11-24 09:20 | 24.1 |
| 2020-11-24 09:30 | 23.9 |
| 2020-11-24 09:40 | 24   |
| 2020-11-24 09:50 | 25.1 |
| 2020-11-24 10:00 | 24.8 |
| 2020-11-24 10:10 | 26   |
| 2020-11-24 10:20 | 26.7 |
| 2020-11-24 10:30 | 27.1 |
| 2020-11-24 10:40 | 28.1 |
| 2020-11-24 10:50 | 27.4 |
| 2020-11-24 11:00 | 28.8 |
| 2020-11-24 11:00 | 28.8 |
| 2020-11-24 11:10 | 28.8 |
| 2020-11-24 11:20 | 29.6 |
| 2020-11-24 11:20 | 29.7 |
| 2020-11-24 11:30 | 29.8 |
| 2020-11-24 11:40 | 30.6 |
| 2020-11-24 11:50 | 30.4 |
| 2020-11-24 12:00 | 31.3 |
| 2020-11-24 12:10 | 31.7 |
| 2020-11-24 12:20 | 32.1 |



|                  |      |
|------------------|------|
| 2020-11-24 12:30 | 31.9 |
| 2020-11-24 12:40 | 32.4 |
| 2020-11-24 12:50 | 33.3 |
| 2020-11-24 13:00 | 32.8 |
| 2020-11-24 13:10 | 33.1 |
| 2020-11-24 13:20 | 33.8 |
| 2020-11-24 13:30 | 32.8 |
| 2020-11-24 13:40 | 33   |
| 2020-11-24 13:50 | 33.4 |
| 2020-11-24 14:00 | 34   |
| 2020-11-24 14:10 | 35.2 |
| 2020-11-24 14:20 | 34.8 |
| 2020-11-24 14:30 | 34.6 |
| 2020-11-24 14:40 | 35.2 |
| 2020-11-24 14:50 | 34.6 |
| 2020-11-24 15:00 | 35.5 |
| 2020-11-24 15:10 | 33.8 |
| 2020-11-24 15:20 | 34.8 |
| 2020-11-24 15:30 | 34.4 |
| 2020-11-24 15:40 | 34.9 |
| 2020-11-24 15:50 | 34.8 |
| 2020-11-24 16:00 | 34.1 |
| 2020-11-24 16:10 | 33.9 |
| 2020-11-24 16:20 | 34.1 |
| 2020-11-24 16:30 | 34.1 |
| 2020-11-24 16:40 | 34.1 |
| 2020-11-24 16:50 | 34.2 |
| 2020-11-24 17:00 | 33.9 |
| 2020-11-24 17:10 | 34.4 |
| 2020-11-24 17:20 | 33.9 |
| 2020-11-24 17:30 | 32.9 |
| 2020-11-24 17:40 | 34.2 |
| 2020-11-24 17:50 | 32.4 |
| 2020-11-24 18:00 | 32.6 |
| 2020-11-24 18:10 | 32.7 |
| 2020-11-24 18:20 | 31.9 |
| 2020-11-24 18:30 | 31.4 |
| 2020-11-24 18:40 | 30.6 |
| 2020-11-24 18:50 | 29.5 |
| 2020-11-24 19:00 | 28.9 |
| 2020-11-24 19:10 | 28.4 |
| 2020-11-24 19:20 | 28   |
| 2020-11-24 19:30 | 27.6 |
| 2020-11-24 19:40 | 27.9 |
| 2020-11-24 19:50 | 27.8 |
| 2020-11-24 20:00 | 27.7 |
| 2020-11-24 20:10 | 27.4 |
| 2020-11-24 20:20 | 26.9 |
| 2020-11-24 20:30 | 26.9 |
| 2020-11-24 20:40 | 26.8 |



|                  |      |
|------------------|------|
| 2020-11-24 20:50 | 26.5 |
| 2020-11-24 21:00 | 26.4 |
| 2020-11-24 21:10 | 26.4 |
| 2020-11-24 21:20 | 26   |
| 2020-11-24 21:30 | 25.8 |
| 2020-11-24 21:40 | 25.8 |
| 2020-11-24 21:50 | 25.8 |
| 2020-11-24 22:10 | 24.8 |
| 2020-11-24 22:20 | 24.9 |
| 2020-11-24 22:30 | 24.3 |
| 2020-11-24 22:40 | 24.2 |
| 2020-11-24 22:50 | 24.9 |
| 2020-11-24 23:00 | 24.6 |
| 2020-11-24 23:10 | 24.5 |
| 2020-11-24 23:20 | 23.9 |
| 2020-11-24 23:30 | 23.6 |
| 2020-11-24 23:40 | 23.5 |
| 2020-11-24 23:50 | 22.8 |
| 2020-11-25 00:00 | 22.1 |
| 2020-11-25 00:10 | 22   |
| 2020-11-25 00:20 | 22.1 |
| 2020-11-25 00:30 | 21.6 |
| 2020-11-25 00:40 | 21.8 |
| 2020-11-25 00:50 | 21.8 |
| 2020-11-25 01:00 | 21   |
| 2020-11-25 01:10 | 20.4 |
| 2020-11-25 01:20 | 20.9 |
| 2020-11-25 01:30 | 21.4 |
| 2020-11-25 01:40 | 21.4 |
| 2020-11-25 01:50 | 21.4 |
| 2020-11-25 02:00 | 21.5 |
| 2020-11-25 02:10 | 21.3 |
| 2020-11-25 02:20 | 21.1 |
| 2020-11-25 02:30 | 20.9 |
| 2020-11-25 02:40 | 20.6 |
| 2020-11-25 02:50 | 20.3 |
| 2020-11-25 03:00 | 19.9 |
| 2020-11-25 03:10 | 19.8 |
| 2020-11-25 03:20 | 19.6 |
| 2020-11-25 03:30 | 19.6 |
| 2020-11-25 03:40 | 19.4 |
| 2020-11-25 03:50 | 19.3 |
| 2020-11-25 04:00 | 19   |
| 2020-11-25 04:20 | 18.8 |
| 2020-11-25 04:30 | 18.7 |
| 2020-11-25 04:40 | 18.5 |
| 2020-11-25 04:50 | 18.4 |
| 2020-11-25 05:00 | 18.3 |
| 2020-11-25 05:10 | 18.2 |
| 2020-11-25 05:20 | 18.2 |



|                  |      |
|------------------|------|
| 2020-11-25 05:30 | 18.1 |
| 2020-11-25 05:40 | 18.1 |
| 2020-11-25 05:50 | 18.2 |
| 2020-11-25 06:00 | 18.5 |
| 2020-11-25 06:10 | 18.8 |
| 2020-11-25 06:20 | 18.8 |
| 2020-11-25 06:30 | 19.4 |
| 2020-11-25 06:40 | 19.9 |
| 2020-11-25 06:50 | 20.3 |
| 2020-11-25 07:00 | 20.6 |
| 2020-11-25 07:10 | 21   |
| 2020-11-25 07:20 | 21.3 |
| 2020-11-25 07:30 | 21.8 |
| 2020-11-25 07:40 | 22.2 |
| 2020-11-25 07:50 | 22.8 |
| 2020-11-25 08:00 | 23.8 |
| 2020-11-25 08:10 | 24.5 |
| 2020-11-25 08:20 | 25.1 |
| 2020-11-25 08:30 | 25.9 |
| 2020-11-25 08:40 | 26.3 |
| 2020-11-25 08:50 | 26.2 |
| 2020-11-25 09:00 | 26.9 |
| 2020-11-25 09:10 | 27.8 |
| 2020-11-25 09:20 | 26.8 |
| 2020-11-25 09:30 | 27.8 |
| 2020-11-25 09:40 | 27.6 |
| 2020-11-25 09:50 | 29.1 |
| 2020-11-25 10:00 | 28.4 |
| 2020-11-25 10:10 | 29.6 |
| 2020-11-25 10:20 | 28.6 |
| 2020-11-25 10:30 | 30.4 |
| 2020-11-25 10:40 | 30.4 |
| 2020-11-25 10:50 | 30.3 |
| 2020-11-25 11:00 | 31.6 |
| 2020-11-25 11:10 | 31.9 |
| 2020-11-25 11:20 | 31.8 |
| 2020-11-25 11:30 | 31.8 |
| 2020-11-25 11:40 | 32.6 |
| 2020-11-25 11:50 | 32.8 |
| 2020-11-25 12:00 | 32.8 |
| 2020-11-25 12:10 | 33.6 |
| 2020-11-25 12:20 | 33.9 |
| 2020-11-25 12:30 | 33.3 |
| 2020-11-25 12:40 | 33.6 |
| 2020-11-25 12:50 | 33.6 |
| 2020-11-25 13:00 | 33.7 |
| 2020-11-25 13:10 | 35.9 |
| 2020-11-25 13:20 | 35.9 |
| 2020-11-25 13:30 | 34.4 |
| 2020-11-25 13:40 | 33.8 |



|                  |      |
|------------------|------|
| 2020-11-25 13:50 | 33.3 |
| 2020-11-25 14:00 | 34.7 |
| 2020-11-25 14:10 | 34.1 |
| 2020-11-25 14:20 | 33.8 |
| 2020-11-25 14:30 | 33   |
| 2020-11-25 14:40 | 34.6 |
| 2020-11-25 14:50 | 35.3 |
| 2020-11-25 15:00 | 37.8 |
| 2020-11-25 15:10 | 36.3 |
| 2020-11-25 15:20 | 35.4 |
| 2020-11-25 15:30 | 36.3 |
| 2020-11-25 15:40 | 35.8 |
| 2020-11-25 15:50 | 35.8 |
| 2020-11-25 16:00 | 37.3 |
| 2020-11-25 16:10 | 35.9 |
| 2020-11-25 16:20 | 35.4 |
| 2020-11-25 16:30 | 35   |
| 2020-11-25 16:40 | 34.4 |
| 2020-11-25 16:50 | 34.2 |
| 2020-11-25 17:00 | 35.2 |
| 2020-11-25 17:10 | 35.2 |
| 2020-11-25 17:20 | 34.3 |
| 2020-11-25 17:30 | 32.9 |
| 2020-11-25 17:40 | 33.6 |
| 2020-11-25 17:50 | 33.4 |
| 2020-11-25 18:00 | 33.4 |
| 2020-11-25 18:10 | 33.4 |
| 2020-11-25 18:20 | 33.3 |
| 2020-11-25 18:30 | 32.3 |
| 2020-11-25 18:40 | 31.4 |
| 2020-11-25 18:50 | 31.1 |
| 2020-11-25 19:00 | 30.6 |
| 2020-11-25 19:10 | 30.4 |
| 2020-11-25 19:20 | 30.2 |
| 2020-11-25 19:30 | 30.1 |
| 2020-11-25 19:40 | 30.1 |
| 2020-11-25 19:50 | 29.9 |
| 2020-11-25 20:00 | 29.9 |
| 2020-11-25 20:10 | 29.9 |
| 2020-11-25 20:20 | 29.4 |
| 2020-11-25 20:30 | 29.3 |
| 2020-11-25 20:40 | 29.4 |
| 2020-11-25 20:50 | 29.4 |
| 2020-11-25 21:00 | 29.5 |
| 2020-11-25 21:10 | 29.6 |
| 2020-11-25 21:20 | 24.7 |
| 2020-11-25 21:30 | 21   |
| 2020-11-25 21:40 | 20   |
| 2020-11-25 21:50 | 19.4 |
| 2020-11-25 22:00 | 19.2 |



|                  |      |
|------------------|------|
| 2020-11-25 22:10 | 19.1 |
| 2020-11-25 22:20 | 19.1 |
| 2020-11-25 22:30 | 18.9 |
| 2020-11-25 22:40 | 19.1 |
| 2020-11-25 22:50 | 19   |
| 2020-11-25 23:00 | 19   |
| 2020-11-25 23:10 | 19   |
| 2020-11-25 23:20 | 19   |
| 2020-11-25 23:30 | 19.1 |
| 2020-11-25 23:40 | 19.1 |
| 2020-11-25 23:50 | 19.2 |
| 2020-11-26 00:00 | 19.1 |
| 2020-11-26 00:10 | 19.2 |
| 2020-11-26 00:20 | 19.1 |
| 2020-11-26 00:30 | 19.1 |
| 2020-11-26 00:40 | 19   |
| 2020-11-26 00:50 | 19   |
| 2020-11-26 01:00 | 19.1 |
| 2020-11-26 01:10 | 19.2 |
| 2020-11-26 01:20 | 19.2 |
| 2020-11-26 01:30 | 19.3 |
| 2020-11-26 01:40 | 19.2 |
| 2020-11-26 01:50 | 19.2 |
| 2020-11-26 02:00 | 19.3 |
| 2020-11-26 02:10 | 19.3 |
| 2020-11-26 02:20 | 19.3 |
| 2020-11-26 02:30 | 19.2 |
| 2020-11-26 02:40 | 19.2 |
| 2020-11-26 02:50 | 19.3 |
| 2020-11-26 03:00 | 19.2 |
| 2020-11-26 03:10 | 18.9 |
| 2020-11-26 03:20 | 18.5 |
| 2020-11-26 03:30 | 18.4 |
| 2020-11-26 03:40 | 18.3 |
| 2020-11-26 03:50 | 18.3 |
| 2020-11-26 04:00 | 18.2 |
| 2020-11-26 04:10 | 18.2 |
| 2020-11-26 04:20 | 18.2 |
| 2020-11-26 04:30 | 18.2 |
| 2020-11-26 04:40 | 18.2 |
| 2020-11-26 04:50 | 18.1 |
| 2020-11-26 05:00 | 18.1 |
| 2020-11-26 05:10 | 17.9 |
| 2020-11-26 05:20 | 17.9 |
| 2020-11-26 05:30 | 17.8 |
| 2020-11-26 05:40 | 17.8 |
| 2020-11-26 05:50 | 17.7 |
| 2020-11-26 06:00 | 17.8 |
| 2020-11-26 06:10 | 17.9 |
| 2020-11-26 06:20 | 17.9 |



|                  |      |
|------------------|------|
| 2020-11-26 06:30 | 18.3 |
| 2020-11-26 06:40 | 18.8 |
| 2020-11-26 06:50 | 19.1 |
| 2020-11-26 07:00 | 19.3 |
| 2020-11-26 07:10 | 19.3 |
| 2020-11-26 07:20 | 19.1 |
| 2020-11-26 07:30 | 19.1 |
| 2020-11-26 07:40 | 19.1 |
| 2020-11-26 07:50 | 18.8 |
| 2020-11-26 08:00 | 18.9 |
| 2020-11-26 08:10 | 19   |
| 2020-11-26 08:20 | 18.9 |
| 2020-11-26 08:30 | 19   |
| 2020-11-26 08:40 | 19.1 |
| 2020-11-26 08:50 | 19.4 |
| 2020-11-26 09:00 | 19.6 |
| 2020-11-26 09:10 | 19.6 |
| 2020-11-26 09:20 | 19.9 |
| 2020-11-26 09:30 | 20.6 |
| 2020-11-26 09:40 | 20.7 |
| 2020-11-26 09:50 | 21.6 |
| 2020-11-26 10:00 | 21.8 |
| 2020-11-26 10:10 | 22.1 |
| 2020-11-26 10:20 | 23   |
| 2020-11-26 10:30 | 23.6 |
| 2020-11-26 10:40 | 24.3 |
| 2020-11-26 10:50 | 24.1 |
| 2020-11-26 11:00 | 23   |
| 2020-11-26 11:10 | 22.7 |
| 2020-11-26 11:20 | 22.7 |
| 2020-11-26 11:30 | 22.8 |
| 2020-11-26 11:40 | 22.4 |
| 2020-11-26 11:50 | 22.3 |
| 2020-11-26 12:00 | 22.5 |
| 2020-11-26 12:10 | 23.3 |
| 2020-11-26 12:20 | 25.4 |
| 2020-11-26 12:30 | 24.9 |
| 2020-11-26 12:40 | 24.4 |
| 2020-11-26 12:50 | 24.4 |
| 2020-11-26 13:00 | 23.4 |
| 2020-11-26 13:10 | 23.4 |
| 2020-11-26 13:20 | 23.9 |
| 2020-11-26 13:30 | 24.1 |
| 2020-11-26 13:40 | 23.7 |
| 2020-11-26 13:50 | 23.8 |
| 2020-11-26 14:00 | 24.7 |
| 2020-11-26 14:10 | 24.6 |
| 2020-11-26 14:20 | 24.6 |
| 2020-11-26 14:30 | 24.6 |
| 2020-11-26 14:40 | 25.3 |



|                  |      |
|------------------|------|
| 2020-11-26 14:50 | 25.4 |
| 2020-11-26 15:00 | 25.6 |
| 2020-11-26 15:10 | 25.9 |
| 2020-11-26 15:20 | 24.8 |
| 2020-11-26 15:30 | 24.9 |
| 2020-11-26 15:40 | 24.6 |
| 2020-11-26 15:50 | 24.8 |
| 2020-11-26 16:00 | 24.4 |
| 2020-11-26 16:10 | 24.7 |
| 2020-11-26 16:20 | 23.8 |
| 2020-11-26 16:30 | 23.8 |
| 2020-11-26 16:40 | 23.1 |
| 2020-11-26 16:50 | 23.1 |
| 2020-11-26 17:00 | 22.3 |
| 2020-11-26 17:10 | 22.3 |
| 2020-11-26 17:20 | 21.6 |
| 2020-11-26 17:30 | 21.7 |
| 2020-11-26 17:40 | 21.6 |
| 2020-11-26 17:50 | 21.4 |
| 2020-11-26 18:00 | 21.1 |
| 2020-11-26 18:10 | 20.9 |
| 2020-11-26 18:20 | 20.9 |
| 2020-11-26 18:30 | 20.8 |
| 2020-11-26 18:40 | 20.6 |
| 2020-11-26 18:50 | 20.3 |
| 2020-11-26 19:00 | 20.2 |
| 2020-11-26 19:10 | 20.2 |
| 2020-11-26 19:20 | 20.1 |
| 2020-11-26 19:30 | 20.1 |
| 2020-11-26 19:40 | 20   |
| 2020-11-26 19:50 | 20.1 |
| 2020-11-26 20:00 | 19.9 |
| 2020-11-26 20:10 | 19.9 |
| 2020-11-26 20:20 | 20   |
| 2020-11-26 20:30 | 19.8 |
| 2020-11-26 20:40 | 19.8 |
| 2020-11-26 20:50 | 19.9 |
| 2020-11-26 21:00 | 19.8 |
| 2020-11-26 21:10 | 19.8 |
| 2020-11-26 21:20 | 19.7 |
| 2020-11-26 21:30 | 19.8 |
| 2020-11-26 21:40 | 19.6 |
| 2020-11-26 21:50 | 19.3 |
| 2020-11-26 22:00 | 19.3 |
| 2020-11-26 22:10 | 19.4 |
| 2020-11-26 22:20 | 19.4 |
| 2020-11-26 22:30 | 19.3 |
| 2020-11-26 22:40 | 19.4 |
| 2020-11-26 22:50 | 19.3 |
| 2020-11-26 23:00 | 19.3 |



|                  |      |
|------------------|------|
| 2020-11-26 23:10 | 19.3 |
| 2020-11-26 23:20 | 19.3 |
| 2020-11-26 23:30 | 19.3 |
| 2020-11-26 23:40 | 19.2 |
| 2020-11-26 23:50 | 19.2 |
| 2020-11-27 00:00 | 19.2 |
| 2020-11-27 00:10 | 19.2 |
| 2020-11-27 00:20 | 19.2 |
| 2020-11-27 00:30 | 19.1 |
| 2020-11-27 00:40 | 18.9 |
| 2020-11-27 00:50 | 18.8 |
| 2020-11-27 01:00 | 18.8 |
| 2020-11-27 01:10 | 18.7 |
| 2020-11-27 01:20 | 18.7 |
| 2020-11-27 01:30 | 18.6 |
| 2020-11-27 01:40 | 18.6 |
| 2020-11-27 01:50 | 18.6 |
| 2020-11-27 02:00 | 18.7 |
| 2020-11-27 02:10 | 18.8 |
| 2020-11-27 02:20 | 18.9 |
| 2020-11-27 02:30 | 18.9 |
| 2020-11-27 02:40 | 19.1 |
| 2020-11-27 02:50 | 19.2 |
| 2020-11-27 03:00 | 19.3 |
| 2020-11-27 03:10 | 19.3 |
| 2020-11-27 03:20 | 19.3 |
| 2020-11-27 03:30 | 19.3 |
| 2020-11-27 03:40 | 19.3 |
| 2020-11-27 03:50 | 19.3 |
| 2020-11-27 04:00 | 19.3 |
| 2020-11-27 04:10 | 19.3 |
| 2020-11-27 04:20 | 19.3 |
| 2020-11-27 04:30 | 19.3 |
| 2020-11-27 04:40 | 19.2 |
| 2020-11-27 04:50 | 19.1 |
| 2020-11-27 05:00 | 19   |
| 2020-11-27 05:10 | 19   |
| 2020-11-27 05:20 | 18.9 |
| 2020-11-27 05:30 | 18.9 |
| 2020-11-27 05:40 | 18.8 |
| 2020-11-27 05:50 | 18.8 |
| 2020-11-27 06:00 | 18.9 |
| 2020-11-27 06:10 | 19.1 |
| 2020-11-27 06:20 | 19.2 |
| 2020-11-27 06:30 | 19.3 |
| 2020-11-27 06:40 | 19.4 |
| 2020-11-27 06:50 | 19.6 |
| 2020-11-27 07:00 | 19.8 |
| 2020-11-27 07:10 | 20.1 |
| 2020-11-27 07:20 | 20.3 |



|                  |      |
|------------------|------|
| 2020-11-27 07:30 | 20.5 |
| 2020-11-27 07:40 | 20.9 |
| 2020-11-27 07:50 | 20.9 |
| 2020-11-27 08:00 | 21.2 |
| 2020-11-27 08:10 | 21.6 |
| 2020-11-27 08:20 | 21.8 |
| 2020-11-27 08:30 | 21.8 |
| 2020-11-27 08:40 | 21.7 |
| 2020-11-27 08:50 | 22.1 |
| 2020-11-27 09:00 | 22.7 |
| 2020-11-27 09:10 | 23.8 |
| 2020-11-27 09:20 | 23.4 |
| 2020-11-27 09:30 | 23.6 |
| 2020-11-27 09:40 | 23.6 |
| 2020-11-27 09:50 | 24.3 |
| 2020-11-27 10:00 | 24.9 |
| 2020-11-27 10:10 | 25.1 |
| 2020-11-27 10:20 | 27.2 |
| 2020-11-27 10:30 | 25.1 |
| 2020-11-27 10:40 | 25.4 |
| 2020-11-27 10:50 | 24.6 |
| 2020-11-27 11:00 | 23.9 |
| 2020-11-27 11:10 | 24.1 |
| 2020-11-27 11:20 | 24.8 |
| 2020-11-27 11:30 | 26.3 |
| 2020-11-27 11:40 | 26.9 |
| 2020-11-27 11:50 | 27.1 |
| 2020-11-27 12:00 | 27.6 |
| 2020-11-27 12:10 | 27.2 |
| 2020-11-27 12:20 | 27.8 |
| 2020-11-27 12:30 | 28.4 |
| 2020-11-27 12:40 | 29.4 |
| 2020-11-27 12:50 | 28.1 |
| 2020-11-27 13:00 | 27.9 |
| 2020-11-27 13:10 | 27.6 |
| 2020-11-27 13:20 | 28.3 |
| 2020-11-27 13:30 | 28.7 |
| 2020-11-27 13:40 | 29.2 |
| 2020-11-27 13:50 | 28.9 |
| 2020-11-27 14:00 | 28.6 |
| 2020-11-27 14:10 | 29.2 |
| 2020-11-27 14:20 | 28.9 |
| 2020-11-27 14:30 | 31.1 |
| 2020-11-27 14:40 | 29.5 |
| 2020-11-27 14:50 | 30.5 |
| 2020-11-27 15:00 | 30.2 |
| 2020-11-27 15:10 | 29.9 |
| 2020-11-27 15:20 | 29.6 |
| 2020-11-27 15:30 | 29   |
| 2020-11-27 15:40 | 28.9 |



|                  |      |
|------------------|------|
| 2020-11-27 15:50 | 29.7 |
| 2020-11-27 16:00 | 28.4 |
| 2020-11-27 16:10 | 27.9 |
| 2020-11-27 16:20 | 26.1 |
| 2020-11-27 16:30 | 25.4 |
| 2020-11-27 16:40 | 25.2 |
| 2020-11-27 16:50 | 24.8 |
| 2020-11-27 17:00 | 24.3 |
| 2020-11-27 17:10 | 24.4 |
| 2020-11-27 17:20 | 24.1 |
| 2020-11-27 17:30 | 23.7 |
| 2020-11-27 17:40 | 23.8 |
| 2020-11-27 17:50 | 23.8 |
| 2020-11-27 18:00 | 23.6 |
| 2020-11-27 18:10 | 23.4 |
| 2020-11-27 18:20 | 23.4 |
| 2020-11-27 18:30 | 23.2 |
| 2020-11-27 18:40 | 23.2 |
| 2020-11-27 18:50 | 23.1 |
| 2020-11-27 19:00 | 23   |
| 2020-11-27 19:10 | 22.9 |
| 2020-11-27 19:20 | 22.7 |
| 2020-11-27 19:30 | 22.4 |
| 2020-11-27 19:40 | 22.1 |
| 2020-11-27 19:50 | 21.8 |
| 2020-11-27 20:00 | 21.6 |
| 2020-11-27 20:10 | 21.4 |
| 2020-11-27 20:20 | 21.3 |
| 2020-11-27 20:30 | 21.3 |
| 2020-11-27 20:40 | 21.1 |
| 2020-11-27 20:50 | 21.1 |
| 2020-11-27 21:00 | 20.9 |
| 2020-11-27 21:10 | 20.8 |
| 2020-11-27 21:20 | 20.6 |
| 2020-11-27 21:30 | 20.4 |
| 2020-11-27 21:40 | 20.3 |
| 2020-11-27 21:50 | 20.2 |
| 2020-11-27 22:00 | 20.1 |
| 2020-11-27 22:10 | 19.9 |
| 2020-11-27 22:20 | 19.9 |
| 2020-11-27 22:30 | 19.8 |
| 2020-11-27 22:40 | 19.7 |
| 2020-11-27 22:50 | 19.7 |
| 2020-11-27 23:00 | 19.6 |
| 2020-11-27 23:10 | 19.5 |
| 2020-11-27 23:20 | 19.4 |
| 2020-11-27 23:30 | 19.3 |
| 2020-11-27 23:40 | 19.2 |
| 2020-11-27 23:50 | 19.1 |
| 2020-11-28 00:00 | 19.1 |



|                  |      |
|------------------|------|
| 2020-11-28 00:10 | 19   |
| 2020-11-28 00:20 | 19   |
| 2020-11-28 00:30 | 19.1 |
| 2020-11-28 00:40 | 19   |
| 2020-11-28 00:50 | 18.9 |
| 2020-11-28 01:00 | 18.9 |
| 2020-11-28 01:10 | 18.8 |
| 2020-11-28 01:20 | 18.7 |
| 2020-11-28 01:30 | 18.7 |
| 2020-11-28 01:40 | 18.6 |
| 2020-11-28 01:50 | 18.6 |
| 2020-11-28 02:00 | 18.5 |
| 2020-11-28 02:10 | 18.5 |
| 2020-11-28 02:20 | 18.4 |
| 2020-11-28 02:30 | 18.3 |
| 2020-11-28 02:40 | 18.2 |
| 2020-11-28 02:50 | 18.1 |
| 2020-11-28 03:00 | 18.1 |
| 2020-11-28 03:10 | 18.1 |
| 2020-11-28 03:20 | 18.1 |
| 2020-11-28 03:30 | 18.1 |
| 2020-11-28 03:40 | 18.1 |
| 2020-11-28 03:50 | 17.9 |
| 2020-11-28 04:00 | 17.9 |
| 2020-11-28 04:10 | 17.9 |
| 2020-11-28 04:20 | 17.8 |
| 2020-11-28 04:30 | 17.9 |
| 2020-11-28 04:40 | 17.9 |
| 2020-11-28 04:50 | 17.8 |
| 2020-11-28 05:00 | 17.8 |
| 2020-11-28 05:10 | 17.8 |
| 2020-11-28 05:20 | 17.7 |
| 2020-11-28 05:30 | 17.6 |
| 2020-11-28 05:40 | 17.6 |
| 2020-11-28 05:50 | 17.8 |
| 2020-11-28 06:00 | 18   |
| 2020-11-28 06:10 | 18.4 |
| 2020-11-28 06:20 | 18.8 |
| 2020-11-28 06:30 | 19.3 |
| 2020-11-28 06:40 | 19.7 |
| 2020-11-28 06:50 | 19.8 |
| 2020-11-28 07:00 | 20.3 |
| 2020-11-28 07:10 | 20.5 |
| 2020-11-28 07:20 | 21.1 |
| 2020-11-28 07:30 | 21.8 |
| 2020-11-28 07:40 | 22   |
| 2020-11-28 07:50 | 22.2 |
| 2020-11-28 08:00 | 22.6 |
| 2020-11-28 08:10 | 24.1 |
| 2020-11-28 08:20 | 24.3 |



|                  |      |
|------------------|------|
| 2020-11-28 08:30 | 24.3 |
| 2020-11-28 08:40 | 25.3 |
| 2020-11-28 08:50 | 25.6 |
| 2020-11-28 09:00 | 26.1 |
| 2020-11-28 09:10 | 27.6 |
| 2020-11-28 09:20 | 26.9 |
| 2020-11-28 09:30 | 27.3 |
| 2020-11-28 09:40 | 27.8 |
| 2020-11-28 09:50 | 28.3 |
| 2020-11-28 10:00 | 28.6 |
| 2020-11-28 10:10 | 29.1 |
| 2020-11-28 10:20 | 29.8 |
| 2020-11-28 10:30 | 29.3 |
| 2020-11-28 10:40 | 30.5 |
| 2020-11-28 10:50 | 30.3 |
| 2020-11-28 11:00 | 30.9 |
| 2020-11-28 11:10 | 31.6 |
| 2020-11-28 11:20 | 31.9 |
| 2020-11-28 11:30 | 32.2 |
| 2020-11-28 11:40 | 31.4 |
| 2020-11-28 11:50 | 30.9 |
| 2020-11-28 12:00 | 31.6 |
| 2020-11-28 12:10 | 30.9 |
| 2020-11-28 12:20 | 30.6 |
| 2020-11-28 12:30 | 32.6 |
| 2020-11-28 12:40 | 31.9 |
| 2020-11-28 12:50 | 32.7 |
| 2020-11-28 13:00 | 32.4 |
| 2020-11-28 13:10 | 31.7 |
| 2020-11-28 13:20 | 31   |
| 2020-11-28 13:30 | 31.1 |
| 2020-11-28 13:40 | 30.2 |
| 2020-11-28 13:50 | 26.4 |
| 2020-11-28 14:00 | 23.3 |
| 2020-11-28 14:10 | 24.1 |
| 2020-11-28 14:20 | 23.8 |
| 2020-11-28 14:30 | 23.9 |
| 2020-11-28 14:40 | 22.8 |
| 2020-11-28 14:50 | 21.7 |
| 2020-11-28 15:00 | 21.7 |
| 2020-11-28 15:10 | 22.1 |
| 2020-11-28 15:20 | 22.6 |
| 2020-11-28 15:30 | 23.4 |
| 2020-11-28 15:40 | 25.6 |
| 2020-11-28 15:50 | 25.9 |
| 2020-11-28 16:00 | 26.1 |
| 2020-11-28 16:10 | 26.3 |
| 2020-11-28 16:30 | 27.3 |
| 2020-11-28 16:40 | 26.5 |
| 2020-11-28 16:50 | 26.1 |



|                  |      |
|------------------|------|
| 2020-11-28 17:00 | 25.8 |
| 2020-11-28 17:10 | 25.8 |
| 2020-11-28 17:20 | 26.8 |
| 2020-11-28 17:30 | 27.1 |
| 2020-11-28 17:40 | 27.7 |
| 2020-11-28 17:50 | 27.6 |
| 2020-11-28 18:00 | 27   |
| 2020-11-28 18:10 | 25.8 |
| 2020-11-28 18:20 | 25.9 |
| 2020-11-28 18:30 | 25.1 |
| 2020-11-28 18:40 | 23.9 |
| 2020-11-28 18:50 | 24.2 |
| 2020-11-28 19:00 | 23.9 |
| 2020-11-28 19:10 | 23.6 |
| 2020-11-28 19:20 | 23.4 |
| 2020-11-28 19:30 | 23   |
| 2020-11-28 19:40 | 22.6 |
| 2020-11-28 19:50 | 22.4 |
| 2020-11-28 20:00 | 22.2 |
| 2020-11-28 20:10 | 22.1 |
| 2020-11-28 20:20 | 21.9 |
| 2020-11-28 20:30 | 22.1 |
| 2020-11-28 20:40 | 22.1 |
| 2020-11-28 20:50 | 21.8 |
| 2020-11-28 21:00 | 21.6 |
| 2020-11-28 21:10 | 21.3 |
| 2020-11-28 21:20 | 21.3 |
| 2020-11-28 21:30 | 20.9 |
| 2020-11-28 21:40 | 20.9 |
| 2020-11-28 21:50 | 20.8 |
| 2020-11-28 22:00 | 20.8 |
| 2020-11-28 22:10 | 20.6 |
| 2020-11-28 22:20 | 20.4 |
| 2020-11-28 22:30 | 20.4 |
| 2020-11-28 22:40 | 20.3 |
| 2020-11-28 22:50 | 20.1 |
| 2020-11-28 23:00 | 20.1 |
| 2020-11-28 23:10 | 20.1 |
| 2020-11-28 23:20 | 20   |
| 2020-11-28 23:30 | 20.1 |
| 2020-11-28 23:40 | 20   |
| 2020-11-28 23:50 | 19.9 |
| 2020-11-29 00:00 | 20   |
| 2020-11-29 00:10 | 20.1 |
| 2020-11-29 00:20 | 20.1 |
| 2020-11-29 00:30 | 20.1 |
| 2020-11-29 00:40 | 20.2 |
| 2020-11-29 00:50 | 20.4 |
| 2020-11-29 01:00 | 20.7 |
| 2020-11-29 01:10 | 20.9 |



|                  |      |
|------------------|------|
| 2020-11-29 01:20 | 21   |
| 2020-11-29 01:30 | 21   |
| 2020-11-29 01:40 | 20.9 |
| 2020-11-29 01:50 | 20.9 |
| 2020-11-29 02:00 | 21.1 |
| 2020-11-29 02:10 | 21.1 |
| 2020-11-29 02:20 | 21.4 |
| 2020-11-29 02:40 | 19.1 |
| 2020-11-29 02:50 | 18.8 |
| 2020-11-29 03:00 | 18.6 |
| 2020-11-29 03:10 | 18   |
| 2020-11-29 03:20 | 17.7 |
| 2020-11-29 03:30 | 17.6 |
| 2020-11-29 03:40 | 17.4 |
| 2020-11-29 03:50 | 17.6 |
| 2020-11-29 04:00 | 17.5 |
| 2020-11-29 04:10 | 17.4 |
| 2020-11-29 04:20 | 17.5 |
| 2020-11-29 04:30 | 17.4 |
| 2020-11-29 04:40 | 17.4 |
| 2020-11-29 04:50 | 17.5 |
| 2020-11-29 05:00 | 17.6 |
| 2020-11-29 05:10 | 17.4 |
| 2020-11-29 05:20 | 17.6 |
| 2020-11-29 05:30 | 17.4 |
| 2020-11-29 05:40 | 17.5 |
| 2020-11-29 05:50 | 17.4 |
| 2020-11-29 06:00 | 17.4 |
| 2020-11-29 06:10 | 17.5 |
| 2020-11-29 06:20 | 17.4 |
| 2020-11-29 06:30 | 17.6 |
| 2020-11-29 06:40 | 17.6 |
| 2020-11-29 06:50 | 17.5 |
| 2020-11-29 07:00 | 17.6 |
| 2020-11-29 07:10 | 17.6 |
| 2020-11-29 07:20 | 17.6 |
| 2020-11-29 07:30 | 17.6 |
| 2020-11-29 07:40 | 17.7 |
| 2020-11-29 07:50 | 17.6 |
| 2020-11-29 08:00 | 17.6 |
| 2020-11-29 08:10 | 17.5 |
| 2020-11-29 08:20 | 17.4 |
| 2020-11-29 08:30 | 17.6 |
| 2020-11-29 08:40 | 17.5 |
| 2020-11-29 08:50 | 17.5 |
| 2020-11-29 09:00 | 17.4 |
| 2020-11-29 09:10 | 17.4 |
| 2020-11-29 09:20 | 17.4 |
| 2020-11-29 09:30 | 17.4 |
| 2020-11-29 09:40 | 17.4 |



|                  |      |
|------------------|------|
| 2020-11-29 09:50 | 17.3 |
| 2020-11-29 10:00 | 17.3 |
| 2020-11-29 10:10 | 17.3 |
| 2020-11-29 10:20 | 17.2 |
| 2020-11-29 10:30 | 17.1 |
| 2020-11-29 10:40 | 17.1 |
| 2020-11-29 10:50 | 17.2 |
| 2020-11-29 11:00 | 17.2 |
| 2020-11-29 11:10 | 17.2 |
| 2020-11-29 11:20 | 17.1 |
| 2020-11-29 11:30 | 17.2 |
| 2020-11-29 11:40 | 17.3 |
| 2020-11-29 11:50 | 17.4 |
| 2020-11-29 12:00 | 17.4 |
| 2020-11-29 12:10 | 17.5 |
| 2020-11-29 12:20 | 17.4 |
| 2020-11-29 12:30 | 17.5 |
| 2020-11-29 12:40 | 17.5 |
| 2020-11-29 12:50 | 17.5 |
| 2020-11-29 13:00 | 17.5 |
| 2020-11-29 13:10 | 17.6 |
| 2020-11-29 13:20 | 17.8 |
| 2020-11-29 13:30 | 17.5 |
| 2020-11-29 13:40 | 17.5 |
| 2020-11-29 13:50 | 17.6 |
| 2020-11-29 14:00 | 17.5 |
| 2020-11-29 14:10 | 17.4 |
| 2020-11-29 14:20 | 17.5 |
| 2020-11-29 14:30 | 17.3 |
| 2020-11-29 14:40 | 17.3 |
| 2020-11-29 14:50 | 17.3 |
| 2020-11-29 15:00 | 17.2 |
| 2020-11-29 15:10 | 17.3 |
| 2020-11-29 15:20 | 17.3 |
| 2020-11-29 15:30 | 17.4 |
| 2020-11-29 15:40 | 17.4 |
| 2020-11-29 15:50 | 17.4 |
| 2020-11-29 16:00 | 17.6 |
| 2020-11-29 16:10 | 17.6 |
| 2020-11-29 16:20 | 17.7 |
| 2020-11-29 16:30 | 17.8 |
| 2020-11-29 16:40 | 17.9 |
| 2020-11-29 16:50 | 17.9 |
| 2020-11-29 17:00 | 17.8 |
| 2020-11-29 17:10 | 17.9 |
| 2020-11-29 17:20 | 17.9 |
| 2020-11-29 17:30 | 17.9 |
| 2020-11-29 17:40 | 18   |
| 2020-11-29 17:50 | 18.1 |
| 2020-11-29 18:00 | 18   |



|                  |      |
|------------------|------|
| 2020-11-29 18:10 | 18.3 |
| 2020-11-29 18:20 | 18.4 |
| 2020-11-29 18:30 | 18.3 |
| 2020-11-29 18:40 | 18.2 |
| 2020-11-29 18:50 | 18.1 |
| 2020-11-29 19:00 | 18   |
| 2020-11-29 19:10 | 18   |
| 2020-11-29 19:20 | 17.9 |
| 2020-11-29 19:30 | 17.9 |
| 2020-11-29 19:40 | 17.7 |
| 2020-11-29 19:50 | 17.6 |
| 2020-11-29 20:00 | 18.1 |
| 2020-11-29 20:10 | 18.3 |
| 2020-11-29 20:20 | 18.1 |
| 2020-11-29 20:30 | 18.2 |
| 2020-11-29 20:40 | 18.1 |
| 2020-11-29 20:50 | 17.8 |
| 2020-11-29 21:00 | 17.7 |
| 2020-11-29 21:10 | 17.9 |
| 2020-11-29 21:20 | 18.1 |
| 2020-11-29 21:30 | 17.8 |
| 2020-11-29 21:40 | 17.8 |
| 2020-11-29 21:50 | 17.8 |
| 2020-11-29 22:00 | 17.8 |
| 2020-11-29 22:10 | 17.8 |
| 2020-11-29 22:20 | 18   |
| 2020-11-29 22:30 | 18.2 |
| 2020-11-29 22:40 | 18.4 |
| 2020-11-29 22:50 | 18.7 |
| 2020-11-29 23:00 | 18.6 |
| 2020-11-29 23:10 | 18.4 |
| 2020-11-29 23:20 | 18.6 |
| 2020-11-29 23:30 | 18.5 |
| 2020-11-29 23:40 | 18.3 |
| 2020-11-29 23:50 | 17.9 |
| 2020-11-30 00:00 | 17.6 |
| 2020-11-30 00:10 | 17.6 |
| 2020-11-30 00:20 | 17.6 |
| 2020-11-30 00:30 | 17.6 |
| 2020-11-30 00:40 | 17.4 |
| 2020-11-30 00:50 | 17.1 |
| 2020-11-30 01:00 | 16.9 |
| 2020-11-30 01:10 | 16.8 |
| 2020-11-30 01:20 | 16.8 |
| 2020-11-30 01:30 | 16.8 |
| 2020-11-30 01:40 | 16.8 |
| 2020-11-30 01:50 | 16.7 |
| 2020-11-30 02:00 | 16.5 |
| 2020-11-30 02:10 | 16.5 |
| 2020-11-30 02:20 | 16.4 |



|                  |      |
|------------------|------|
| 2020-11-30 02:30 | 16.4 |
| 2020-11-30 02:40 | 16.3 |
| 2020-11-30 02:50 | 16.3 |
| 2020-11-30 03:00 | 16.3 |
| 2020-11-30 03:10 | 16.2 |
| 2020-11-30 03:20 | 16.1 |
| 2020-11-30 03:30 | 16.2 |
| 2020-11-30 03:40 | 16.1 |
| 2020-11-30 03:50 | 16.1 |
| 2020-11-30 04:00 | 16.1 |
| 2020-11-30 04:10 | 15.9 |
| 2020-11-30 04:20 | 15.9 |
| 2020-11-30 04:30 | 15.9 |
| 2020-11-30 04:40 | 15.8 |
| 2020-11-30 04:50 | 15.6 |
| 2020-11-30 05:00 | 15.8 |
| 2020-11-30 05:10 | 15.8 |
| 2020-11-30 05:20 | 15.9 |
| 2020-11-30 05:30 | 15.8 |
| 2020-11-30 05:40 | 15.8 |
| 2020-11-30 05:50 | 15.8 |
| 2020-11-30 06:00 | 15.8 |
| 2020-11-30 06:10 | 15.9 |
| 2020-11-30 06:20 | 16   |
| 2020-11-30 06:30 | 16.1 |
| 2020-11-30 06:40 | 16.4 |
| 2020-11-30 06:50 | 17.6 |
| 2020-11-30 07:00 | 17.4 |
| 2020-11-30 07:10 | 17.9 |
| 2020-11-30 07:20 | 19   |
| 2020-11-30 07:30 | 19.1 |
| 2020-11-30 07:40 | 20   |
| 2020-11-30 07:50 | 21.4 |
| 2020-11-30 08:00 | 21.5 |
| 2020-11-30 08:10 | 21.4 |
| 2020-11-30 08:20 | 20.9 |
| 2020-11-30 08:30 | 21.6 |
| 2020-11-30 08:40 | 22.3 |
| 2020-11-30 08:50 | 22   |
| 2020-11-30 09:00 | 21.6 |
| 2020-11-30 09:10 | 21.2 |
| 2020-11-30 09:20 | 21.1 |
| 2020-11-30 09:30 | 21.5 |
| 2020-11-30 09:40 | 22.1 |
| 2020-11-30 09:50 | 22.2 |
| 2020-11-30 10:00 | 22.1 |
| 2020-11-30 10:10 | 22.1 |
| 2020-11-30 10:20 | 21.8 |
| 2020-11-30 10:30 | 22.1 |
| 2020-11-30 10:40 | 22.6 |



|                  |      |
|------------------|------|
| 2020-11-30 10:50 | 22.6 |
| 2020-11-30 11:00 | 21.9 |
| 2020-11-30 11:10 | 21.8 |
| 2020-11-30 11:20 | 21.8 |
| 2020-11-30 11:30 | 22   |
| 2020-11-30 11:40 | 22.6 |
| 2020-11-30 11:50 | 22.6 |
| 2020-11-30 12:00 | 22.6 |
| 2020-11-30 12:10 | 22.6 |
| 2020-11-30 12:20 | 22.4 |
| 2020-11-30 12:30 | 22.6 |
| 2020-11-30 12:40 | 23.7 |
| 2020-11-30 12:50 | 23.4 |
| 2020-11-30 13:00 | 22.3 |
| 2020-11-30 13:10 | 21.9 |
| 2020-11-30 13:20 | 21.8 |
| 2020-11-30 13:30 | 21.6 |
| 2020-11-30 13:40 | 21.3 |
| 2020-11-30 13:50 | 21.2 |
| 2020-11-30 14:00 | 21.3 |
| 2020-11-30 14:10 | 20.9 |
| 2020-11-30 14:20 | 21.1 |
| 2020-11-30 14:30 | 20.9 |
| 2020-11-30 14:40 | 20.8 |
| 2020-11-30 14:50 | 20.3 |
| 2020-11-30 15:00 | 19.6 |
| 2020-11-30 15:10 | 19.8 |
| 2020-11-30 15:20 | 19.7 |
| 2020-11-30 15:30 | 19.9 |
| 2020-11-30 15:40 | 20.2 |
| 2020-11-30 15:50 | 20.2 |
| 2020-11-30 16:00 | 20.3 |
| 2020-11-30 16:10 | 20.8 |
| 2020-11-30 16:20 | 21.5 |
| 2020-11-30 16:30 | 21.9 |
| 2020-11-30 16:40 | 21.4 |
| 2020-11-30 16:50 | 21.1 |
| 2020-11-30 17:00 | 21.1 |
| 2020-11-30 17:10 | 21.4 |
| 2020-11-30 17:20 | 20.6 |
| 2020-11-30 17:30 | 20.4 |
| 2020-11-30 17:40 | 20.5 |
| 2020-11-30 17:50 | 20.4 |
| 2020-11-30 18:00 | 20.3 |
| 2020-11-30 18:10 | 20.2 |
| 2020-11-30 18:20 | 20.3 |
| 2020-11-30 18:30 | 20.3 |
| 2020-11-30 18:30 | 20.3 |
| 2020-11-30 18:40 | 20.3 |
| 2020-11-30 18:50 | 20.3 |



|                  |      |
|------------------|------|
| 2020-11-30 19:00 | 20.2 |
| 2020-11-30 19:10 | 20   |
| 2020-11-30 19:20 | 19.9 |
| 2020-11-30 19:30 | 19.9 |
| 2020-11-30 19:40 | 19.6 |
| 2020-11-30 19:50 | 19.6 |
| 2020-11-30 20:00 | 19.6 |
| 2020-11-30 20:10 | 19.4 |
| 2020-11-30 20:20 | 19.4 |
| 2020-11-30 20:30 | 19.3 |
| 2020-11-30 20:40 | 19.3 |
| 2020-11-30 20:50 | 19.2 |
| 2020-11-30 21:00 | 19.2 |
| 2020-11-30 21:10 | 19.3 |
| 2020-11-30 21:20 | 19.4 |
| 2020-11-30 21:30 | 19.4 |
| 2020-11-30 21:40 | 19.2 |
| 2020-11-30 21:50 | 19.2 |
| 2020-11-30 22:00 | 19.1 |
| 2020-11-30 22:10 | 19   |
| 2020-11-30 22:20 | 18.9 |
| 2020-11-30 22:30 | 19   |
| 2020-11-30 22:40 | 18.8 |
| 2020-11-30 22:50 | 18.9 |
| 2020-11-30 23:00 | 18.9 |
| 2020-11-30 23:10 | 18.9 |
| 2020-11-30 23:20 | 18.7 |
| 2020-11-30 23:30 | 18.4 |
| 2020-11-30 23:40 | 18.3 |
| 2020-11-30 23:50 | 18.3 |



120/Nov)

rainfall (mm)

0  
0  
0  
0  
0  
4.5  
37  
0.7  
0  
0  
0  
0  
0  
0.3  
0  
8.9  
2.7  
0.3  
0.3  
0  
0  
0  
0  
0  
0  
0  
7.5  
1.4  
0  
0  
0  
0  
0  
0  
0  
0  
0  
1.4  
0.3  
0.3  
0  
0  
0  
0  
0  
0  
0  
0



0  
0  
0  
0  
0  
7.5  
0  
9.6  
0.3  
0  
0  
0  
3.4  
0.3  
0  
0  
0  
0  
0  
0  
0  
9.6  
0  
14.7  
0.7  
0  
0  
0  
1  
0  
0.7  
0  
0  
0  
0  
0  
0  
2.1  
0.3  
0  
5.1  
74.1  
1
